# Supplementary material for: Association of variation in the sugarcane transcriptome with sugar content
Source: BMC Genomics. 2017 Nov 25;18:909. doi: 10.1186/s12864-017-4302-5 (PMC5702190; doi:10.1186/s12864-017-4302-5)
Supplement: Supplementary file 3 — List of DEGs in the SUGIT, HST VS HSB. Table S8 List of DEGs in the SUGIT, LST VS LSB. Table S9 List of DEGs in the SUGIT, HST VS HSB. (XLSX 3817 kb) [file 12864_2017_4302_MOESM3_ESM.xlsx]

## Sheet: Table S7
	TABLE S7. Complete list of DEGs in the SUGIT, HSB VS LSB
	Feature ID	Fold Change (original values)	Weighted proportions difference	FDR p-value correction	B9	B14	B4	B5	B6	B7	B13	B2	B19	B20	B16	B1	B10	B18
	c100002f2p32242	-6.16	6.04e-05	0.000172	11.58	61.11	41.37	53.99	74.4	88.16	47.21	3.08	3.19	10.95	5.63	15.53	7.64	15.28
	c100005f1p01020	-6.39	9.75e-06	0.000623	1.59	9.85	12.36	6.77	13.47	11.16	5.08	0.56	0.22	1.97	0.21	2.79	0.72	2.97
	c100009f2p13578	-6.7	1.73e-05	6.01e-05	2.72	19.82	20.61	10.26	20.53	15.21	16.86	1.38	1.31	2.13	1.85	4.04	1.26	3.84
	c100015f1p02099	-7.6	4.86e-05	4.79e-05	4.59	47.67	57.01	44.85	35.26	52.97	49.48	2.68	0.79	3.96	5.68	8.29	1.78	15.2
	c100020f5p01726	-5.33	3.87e-06	0.00556	1.28	3.41	5.18	3.72	4.6	3.84	3.14	0.44	0.19	0.53	0.47	1.58	0.29	1.22
	c100029f1p41343	-11.45	7.88e-06	0.0049	0.48	9.78	12.1	3.41	9.73	6.45	2.58	0.62	0.08	0.67	0.39	1.53	0.09	0.5
	c100038f2p13475	-5.42	2.19e-05	8.14e-05	5.45	26.29	14.95	30.71	26.41	19.46	18.16	1.33	1.77	4.07	3.26	7.02	3.11	5.54
	c100040f1p61370	-6.34	7.32e-06	0.00288	1.41	13.14	6	7.59	8.09	4.53	4.46	0.37	0.57	1.6	0.71	3.07	0.36	0.45
	c100042f1p01711	-7.31	1.08e-05	0.00454	1.34	15.19	8.01	8.77	18.85	6.13	6.9	1.37	0.39	0.44	0.26	2.85	0.63	2.97
	c100070f6p1742	-6.68	1.43e-05	0.000828	2.97	14.7	13.6	11.11	16.29	22.48	6.55	0.73	0.45	1.63	1.4	5.45	1.17	2.28
	c100100f2p11858	-8.4	4.15e-06	0.00161	0.25	1.87	4.51	3.97	4.14	4.75	5.09	0.27	0.06	0.94	0.08	0.36	0.22	1
	c100105f2p11237	-5.96	7.34e-06	0.00165	0.97	4.06	9.68	8.15	10.19	8.48	4.38	0.54	0.72	1.53	0.78	3.08	0.5	0.54
	c100110f2p02906	-7.44	2.97e-05	0.000121	4.9	22.91	33.63	30.92	18.74	30.59	36.12	2.19	0.42	3.21	2.33	13.86	1.1	0.78
	c100122f2p2934	-7.15	3.24e-05	0.0019	4.33	19.29	43.38	17.44	43.42	23.62	45.5	2.78	0.6	3.81	1.59	12.3	1.02	5.44
	c100141f1p11970	-4.8	1e-05	0.00054	2.59	12.98	14.29	8.64	7.98	7.08	13.41	0.74	1.29	0.8	2.36	5.2	1.02	2.56
	c100160f5p11467	-5.14	5.72e-06	0.00103	1.88	7.56	4.42	7.1	6.18	7.52	2.27	0.6	0.46	0.72	1.93	1.63	0.65	1.19
	c1001f7p11291	-4.57	7.38e-06	0.00173	2.13	5.64	7.37	9.06	12.59	8.44	4.52	0.88	1.04	3.46	0.69	1.47	1.03	2.31
	c100204f3p3721	-5.91	1.91e-05	7.01e-05	7.27	28.14	23.22	17.17	9.27	15.7	19.09	2.38	1.24	2	3.51	7.23	1.5	2.42
	c10021f4p2714	-6.47	1.86e-05	7.13e-05	6.05	15.54	10.31	25.96	20.66	14.89	20.64	1.29	1.25	1.91	0.42	7.53	0.99	4.25
	c100253f1p2976	-4.72	6.55e-06	0.00251	0.65	9.48	3.8	8.42	8.04	5.87	7.46	0.81	0.68	0.84	1.21	3.01	1.05	1.66
	c10026f1p1825	-5.15	3.36e-06	0.01	0.22	3.57	2.8	4.59	1.68	4.18	5.06	0.05	0.41	0.64	0.27	1.5	0.05	1.37
	c100274f2p01134	-5.89	8.81e-06	5.81e-05	2.26	10.21	7.74	8.44	6.32	12.01	7.82	0.92	0.2	1.93	1.37	2.04	0.73	2.12
	c10027f1p02271	-5.4	5.04e-06	0.00144	0.67	5.73	5.43	4.41	4.8	5.7	6.12	0.63	0.36	0.73	0.82	1.86	0.46	1.23
	c1002f2p01118	-6.82	4.15e-06	0.00814	0.49	3.25	8.11	3.02	4.05	3.08	3.1	0.15	0.1	0.07	0.73	1.4	0.41	0.83
	c100307f1p11661	-7.89	1.36e-05	0.00643	1.33	18.25	11.61	8.02	25.09	8.02	8.83	0.48	0.68	1.79	2.39	3.1	0.33	1.52
	c100320f7p51113	-7.73	4.12e-06	0.00779	0.99	2.34	4.54	4.26	7.7	1.61	2.87	0.38	0	0.95	0.47	1.04	0.07	0.23
	c100350f3p0760	-6.08	9e-06	0.00033	2.29	6.13	11.34	12.75	4.95	9.4	9.1	1.86	1.03	0.69	0.78	2.06	1.03	1.75
	c100388f2p0568	-9.16	5.06e-06	0.000397	1.62	7.01	2.54	3.45	5.54	3.64	5.62	0.66	0.2	0.4	0.26	0.15	0.73	0.81
	c100406f2p31108	-6.98	3.66e-06	0.00689	0.5	2.5	5.73	3.42	1.36	5.35	3.01	0.34	0.1	0.07	0.2	1.49	0.19	0.74
	c100423f1p01700	-5.22	5.05e-05	0.000175	12.24	47.94	71.82	59.95	59.55	54.97	25.21	8.23	3.04	9.35	6.73	18.83	4.66	12.69
	c100432f1p01520	-5.27	5.03e-05	0.00101	10.08	66.71	68.52	48.11	48.93	67.8	19.35	3.71	4.71	5.62	9.68	17.32	5.79	15.73
	c10044f1p3574	-5.35	2.55e-05	0.000241	4.96	15.41	36.96	29.47	30.53	23.09	25.19	2.99	0.2	4.22	2.98	9.08	3.26	8.24
	c100456f1p01113	-4	2.83e-05	0.00112	7.9	44.05	40.19	24.04	28.84	26.33	31.3	2.05	2.03	5.07	7.07	20.57	2.71	11.15
	c10045f1p01604	-7.18	4.51e-06	0.00134	0.8	3.93	3.94	3.61	7.14	3.31	4.72	0.17	0.07	0.61	0.3	0.94	0.3	1.44
	c100462f2p01443	-5.57	6.69e-06	0.00243	0.83	3.37	6.32	7.01	10.95	6.33	7.73	0.87	0	0.89	1.24	2.36	0.84	1.43
	c100497f2p21462	-5.83	4.2e-06	0.00717	0.87	3.87	4.98	0.78	6.91	4.57	4.23	0.2	0.23	1.08	0.45	1.23	0.03	1.29
	c100522f2p0575	-10.44	3.53e-05	3.52e-05	6.05	20.73	38.02	45.26	26.44	26.32	38.31	1.45	3.49	1.97	1.29	3.58	2.31	5.17
	c10052f1p01650	-4.25	1.69e-05	0.01	2.29	20.19	18.99	30.44	5.51	21.35	19.9	1.98	0.14	4.23	0.59	7.07	3.13	10.82
	c100540f12p4916	-15.94	2.43e-06	0.01	0.5	1.51	4.73	1.85	2.2	1.96	0.3	0.09	0.12	0	0.24	0.36	0	0
	c100542f1p21375	-5.29	1.28e-05	7.99e-05	2.53	13.84	16.97	12.67	13.54	13.32	9.79	0.85	0.98	2.8	1.73	5.88	0.36	3.02
	c10055f1p11014	-5.99	1.62e-05	0.00239	1.99	11.29	13.24	10.21	24.99	15.66	24.81	1.28	1.88	4.11	2.5	3.18	0.98	3.14
	c100578f1p01469	-5.21	4e-06	0.00509	1.26	4.28	4.85	5.99	3.11	1.42	5.34	0.26	0.31	0.83	0.66	1.93	0.48	0.56
	c100587f3p4872	-6.8	5.3e-05	0.00155	7.48	67.21	68.69	49.58	79.67	28.49	27.1	4.9	1.03	4	6.92	18.5	3.96	8.96
	c10062f1p31864	-4.21	3.64e-06	0.01	0.78	4.24	3.69	5.33	3.08	3.67	4.88	0.38	0.12	0.68	1.03	1.1	0.33	2.46
	c100644f2p01267	-4.36	0.000212	0.000474	41.14	288.56	212.12	169.22	217.19	322.85	226.55	18.58	18.18	70.3	41.83	86.62	24.47	78.53
	c100649f3p01284	-8.03	3.01e-06	0.00816	0.57	1.75	3.36	1.94	3.23	3.86	3.24	0.62	0.17	0.29	0.12	0.51	0.16	0.36
	c100653f4p5676	-7.92	9.79e-05	0.01	2.18	97.72	197.29	83.07	50.73	54.11	107.55	9.98	3.81	17.03	11.34	14.19	4.24	14.22
	c10069f1p11655	-6.27	1.49e-05	6.72e-05	3.23	15.42	22.44	13.14	13.81	11.61	12.87	1.19	0.41	1.88	1.89	5.15	1.18	3.05
	c100710f3p12051	-6	1.11e-05	0.00839	1.61	14.26	4.35	6.82	8.22	15.92	18.4	1.35	0.49	2.69	0.98	1.97	0.91	3.2
	c100711f2p22172	-5.49	1.02e-05	0.000346	0.72	11.48	8.03	9.24	11.94	10.54	13.36	1.41	0.36	2.3	1.88	3.08	1.28	1.58
	c100726f1p13258	-8.14	9.28e-06	0.000489	1.26	8.35	8.27	6.35	9.26	6.4	14.66	1.72	0.07	1.48	0.57	0.35	0.52	1.99
	c100743f3p61633	-5.64	2.05e-05	0.00388	3.21	25.8	16.53	20.01	25.09	32.71	7.66	0.51	0.27	3.52	3.42	9.67	2.06	3.75
	c100756f1p0740	6.91	-2.71e-06	0.01	1.37	0	0	0.46	0	0	0	4.43	1.52	1.64	1.41	0.9	1.63	1.11
	c10076f2p01209	-5.48	5.46e-05	0.000409	14.05	29.66	72.17	61.67	83.15	43.24	49.17	4.78	5.37	2.94	6.65	20.78	5.57	18.31
	c100776f10p31162	-9.61	1.02e-05	0.00111	0.47	14.18	7.58	3.96	11.39	11.76	9.33	0.65	0	1.56	0.58	1.21	0.64	1.46
	c100797f2p41702	-6.61	4.21e-06	0.01	0.65	2.55	4.83	4.21	3.55	1.62	8.24	0.76	0.07	0.62	0.31	1.12	0.07	0.94
	c10083f1p11298	-5.53	5.2e-06	0.00131	1.41	2.93	5.87	5.19	8.61	4.45	4.37	0.48	0.26	1.45	0.06	2.6	0.77	0.32
	c10084f1p01043	-9.57	4.47e-06	0.00541	1.23	2.66	7.47	4.6	3.86	0.53	5.19	0.2	0.11	0.07	0.71	0.08	0.96	0.54
	c10089f1p0857	-5.19	5.31e-06	0.00368	0.64	9.09	6.39	5.44	5.29	3.86	3.73	1.07	0.13	0.79	1.74	1.16	0.48	1.26
	c100957f5p01477	-7.6	4.05e-06	0.00592	0.68	6.22	6.45	2.34	2.22	3.08	2.92	0.37	0	0.87	0.15	0.73	0.37	0.66
	c10095f1p01128	-5.2	3.5e-06	0.00902	1.22	3.23	3.58	3.48	5.03	2.08	4.31	0.52	0.2	0.27	0.13	1.69	0.33	1.28
	c100f7p41259	-6.33	3.08e-06	0.0087	3.5	1.38	0.34	5	1.8	3.62	2.65	0.53	0	0.78	0.35	0.53	0.33	0.37
	c101006f17p01143	-7.28	8.42e-06	0.00825	0.56	4.55	13.01	11.36	9.82	2.05	9.61	0.62	0.1	1.86	0.65	1.74	0.73	1.3
	c101027f56p71017	-3.93	4.86e-06	0.00697	2.44	9.03	6.24	2.26	4.33	6.51	3.82	0.62	1.32	0.37	2.41	2.76	0.57	0.76
	c10103f1p01884	-8.75	3.18e-06	0.006	0.49	3.5	5.52	2.98	2.28	1.9	2.14	0.13	0.18	0.52	0.4	0.53	0.07	0.33
	c101043f2p01794	-6.23	4.97e-06	0.00107	0.26	3.57	4.82	6.48	5.48	6.23	4.41	0.68	0.12	0.76	0.41	1.75	0.49	0.8
	c101048f13p0946	-7.65	1.36e-05	0.0005	0.97	13.01	7.63	12.94	11.06	16.93	18.37	0.71	0.71	1.04	1.34	2.19	2.37	2.23
	c101055f6p21349	-7.25	3.56e-06	0.00739	0.41	5.38	5.65	2.6	3.07	2.45	1.64	0.19	0.17	0.28	0.05	0.92	0.68	0.65
	c101079f16p21533	-9.57	4.07e-05	0.00139	2.94	40.92	45.45	34.27	29.18	64.43	18.76	1.58	2.26	6.62	3.15	6.15	1.33	3.55
	c101081f50p71323	-6.13	1.78e-05	0.01	2.43	13.11	16.8	13.6	37.74	14.5	14.19	0.57	0.68	1.43	2.36	5.44	0.66	7.19
	c1010f18p1841	-6.97	1.57e-05	0.000946	2.19	11.75	26.43	17.94	15.29	11.16	11.41	1.39	0.8	0.63	1.77	5.02	0.4	3.79
	c101105f6p21295	-6.4	3.15e-06	0.00965	0.78	2.41	3.9	2.77	2.73	1.28	5.8	0.36	0.09	0.41	0.69	0.83	0.39	0.32
	c101117f29p101106	-6.36	1.93e-05	0.000416	1.91	22.57	14.62	27.53	14.36	22.47	16.72	0.15	1.42	4.93	3.3	3.07	0.86	5.16
	c10112f2p01065	-11.75	9.07e-06	0.00377	0.09	11.41	13.29	5.34	4.98	4.41	11.63	0.31	0.11	0.36	0.56	1.48	0.43	1.11
	c101141f22p51223	-6.35	2.69e-05	0.000913	3.38	19.99	41.19	19.31	30.82	20.32	32.85	2.06	1.01	2.72	1.16	12.58	2.01	4.92
	c101188f34p2982	-5.33	4.97e-05	0.00779	9.17	36.2	95.39	70.83	34.28	28.39	51.67	6.44	1.03	5.55	6.07	24.17	5.8	12.14
	c101194f14p41022	-5.78	0.000329	8.17e-05	46.68	348.97	310	298.23	455.6	390.89	256.54	38.94	14.8	65.58	45.02	62.8	32.87	104.8
	c101201f11p3843	-5.64	1.78e-05	0.00368	4.25	13.78	21.92	33.15	15.11	9.66	16.33	0.99	0.4	3.59	1.24	8.24	2.07	3.72
	c101202f8p71083	-12.47	1.1e-05	0.00502	2.2	5.75	21.8	6.48	9.64	6.1	9.86	0.81	0.31	0.35	0.89	1.75	0.23	0.62
	c10120f2p01016	-5.01	1.19e-05	0.000345	2.97	17.63	11.15	10.18	14.79	13.22	8.56	1.88	0.66	0.67	1.82	6.06	0.57	4.02
	c101218f1p41203	-9.19	8.45e-06	0.000311	0.53	6.62	10.79	8.04	10.89	6.65	5.2	0.49	0.19	0.82	0.37	1.1	0.93	1.41
	c101240f9p2984	-12.21	8.42e-06	0.00219	0.65	7.39	2.49	8.24	5.89	8.97	13.13	0.13	0.23	1.15	0.6	1.01	0.08	0.63
	c101247f2p0656	-7.98	1.46e-05	0.00332	1.96	9.26	12.34	10.64	27.72	10.33	14.64	0.51	1.03	2.66	1.82	1.26	0.63	2.98
	c101265f10p31917	-5.09	9.69e-06	0.000222	1.58	12.57	13.4	8.75	8.81	9.86	8.19	1.2	0.58	1.54	1.16	3.92	1.15	2.84
	c101271f64p201580	-7.65	9.72e-06	0.000871	0.7	11.52	7.39	8.56	9.41	5.94	14.42	0.32	0.07	3.5	0.09	1.52	0.58	1.5
	c101283f7p21262	-6.83	3.28e-06	0.00793	0.36	2.47	4.57	5.46	1.8	3.06	1.98	0.23	0.18	0.36	1.12	0.52	0.07	0.41
	c101293f12p5741	-3.79	5.9e-05	0.01	18.73	78.85	55.9	72.68	33.18	53.28	118.38	7.86	1.81	10.94	8.24	45.32	5.22	34.26
	c101361f2p11288	-10.37	3.04e-06	0.00569	0.86	3.23	3.03	3.41	2.94	3.75	0.22	0.62	0.17	0.12	0.29	0.06	0.26	0.16
	c1013f3p01270	-4.79	5.22e-06	0.00169	0.87	6.14	5.68	4.95	7.25	5.65	4.82	1.06	0.09	1.01	0.76	1.95	0.52	1.98
	c10142f1p01361	-5.35	3.89e-06	0.00538	0.95	2.42	3.82	4.92	3.61	3.14	6.44	0.43	0.33	1	0.38	1.76	0.37	0.45
	c10145f1p0743	-5.47	4.14e-05	6.9e-05	7.18	33.6	44.68	38.79	43.61	51.28	47.71	2.71	1.96	6.12	5.21	18.92	3.52	10.38
	c101461f22p4777	-6.17	3.78e-05	0.00691	7.57	20.31	71.89	52.94	22.88	38.55	23.44	3.13	1.87	2.73	6.8	10.43	3.8	9.72
	c10146f2p01179	-5.91	1.46e-05	1.86e-05	3.43	17.94	16.53	12.57	12.51	11.94	16.04	1.53	0.67	1.61	1.71	4.56	1.3	4.01
	c101491f22p71227	-5.53	9.23e-05	5.88e-05	20.17	130.96	78.64	92.27	80.93	100.1	90.49	9.53	1.74	8.9	11.96	28.87	7.46	38.95
	c101507f7p61447	-6.17	3.28e-06	0.0085	1.02	1.68	3.09	4.77	4.62	2.67	2.69	0.17	0	0.68	0.87	0.63	0.4	0.57
	c101526f4p21405	-5.24	1.04e-05	0.00644	2.02	9.73	4.51	12.25	18.54	14.12	6.62	1.9	1.19	1.56	1.53	4.58	0.71	1.46
	c101543f8p61560	-5.69	7.44e-06	0.00753	1.59	6	5.09	6.02	15.35	6.46	6.86	0.67	0	1.16	0.57	2.28	0.51	3.13
	c101557f127p301196	-4.04	1.53e-05	0.00392	3.46	12.17	17.85	25.49	21.28	9.46	19.63	0.91	0.75	4.94	4.23	9.12	1.74	5.41
	c10155f1p01627	-5.11	1.32e-05	0.000398	2.6	13.53	8.61	14.68	20.77	11.71	14.35	1.47	0.62	2.51	1.78	4.27	1.79	4.42
	c101604f26p51370	-5.67	1.69e-05	0.000747	3.34	10.09	13.02	20.32	27.33	19.28	14.46	1.71	1.14	1.82	2.55	3.79	2.78	5.23
	c101612f40p31092	-5	1.69e-05	0.000374	5.3	9.84	21.39	14.67	24.57	17.93	17.04	0.73	0.2	3.26	2.93	9.61	0.8	4.61
	c10166f1p0777	-8.27	1.45e-05	0.0025	2.37	7.36	18.2	18.29	20.77	4.62	14.13	0.38	0.43	2.34	0.57	1.06	0.48	5.09
	c10170f1p31528	-6.1	6.08e-06	0.000677	0.42	6.24	6.61	4.07	8.33	5.06	6.82	0.16	0.37	1.09	0.83	1.95	0.65	1.11
	c10180f3p0975	-4.99	7.14e-06	0.000251	1.23	7.87	6.7	6.98	10.15	7.55	6.03	1.17	0.81	0.86	1.08	2.39	1.16	1.86
	c10181f1p0714	-6.39	7.01e-06	0.00121	1.93	7.03	3.84	8.14	4.76	11.58	5.64	0.76	0.31	0.95	1.25	1.85	0.87	0.72
	c10186f1p1777	-7.24	8.24e-06	0.00384	0.83	6.25	15.6	6.88	8.11	6.04	6.08	0.92	0.29	0.29	0.96	2.55	0.21	1.65
	c10195f1p2454	-6.16	1.87e-05	0.00232	3.24	14.51	33.06	15.05	24.16	18.85	9.19	2.21	0.74	2	0.98	4.55	3.57	5.09
	c10197f1p01061	-5.12	3.1e-05	3.56e-05	5.5	36.01	29.7	33.35	37.27	28.54	33.29	3.8	1.47	5.03	5.29	13.62	3.54	7.02
	c101f14p0972	-4.59	1.73e-05	0.000788	3.5	19.78	10.83	22.67	16.33	20.15	24.15	2.32	0.69	2.49	1.68	8.08	2.35	7.98
	c10212f1p41219	-5.92	8.65e-06	0.01	1.36	17.35	5.09	9.93	6.83	6.68	7.41	0.17	0.55	1.55	1.4	4.68	0.58	0.3
	c10216f4p01113	-5.02	1.6e-05	0.000995	2.39	14.15	17.35	23.91	9.84	17.58	20.45	1.16	0.9	3.4	2.6	7.34	1.27	4.38
	c10217f1p01163	-4.1	1.04e-05	6.33e-05	3.2	12.66	9.92	10.05	12.42	12.07	12.16	1.03	0.67	2.57	1.58	5.55	1.55	4.71
	c10218f8p01271	-5.18	4.52e-05	3.15e-05	11.07	33.83	48.38	55.73	59.42	46.92	40.91	4.55	3.17	8.04	8.32	13.73	4.09	15.33
	c10219f1p0569	-7.76	7.19e-05	0.000232	9.21	54.54	76.1	105.47	46.98	82.24	56.19	6.85	0.59	12.51	7.46	7.99	6.94	13.19
	c102214f10p134694	-6.23	7.6e-05	0.00065	7.31	94.4	103.06	96.09	77.13	64.5	37.29	5.48	1.12	14.64	10.39	20.96	5.64	18.82
	c10223f5p21650	-5.29	1.2e-05	0.00257	1.39	19.11	7.43	7.34	13.82	15.38	13.39	0.53	0.75	2.94	2.93	3.51	0.73	3.33
	c102317f5p84057	-8.95	1.76e-05	0.0066	4.32	35.74	11.09	7.47	15.31	14.28	14.48	0.95	0.03	0.19	2.09	1.83	0.61	5.77
	c10232f4p0830	-4.85	1.26e-05	0.00712	3.33	7.34	19.55	8.26	8.54	21.53	15.13	2.99	0.41	0.64	3.78	6.2	0.8	2.42
	c10236f1p01125	-4.76	3.94e-06	0.01	0.57	2.61	3.32	3.84	2.79	5.5	7.39	0.3	0.2	1.61	0.33	1.32	0.07	1.64
	c1023f8p31320	-6.18	2.95e-06	0.01	0.28	4.2	4.37	1.74	1.72	3.66	2.63	0.29	0.17	0	0.51	1.13	0.22	0.7
	c10243f3p12078	-4.51	7.6e-06	0.000729	1.24	8.82	6.86	9.35	11.44	6.69	6.87	0.2	0.75	2.04	1.5	2.46	0.68	3.75
	c10247f1p01407	-10.89	4.76e-06	0.01	0.72	8.69	7.03	3.34	1.26	3.06	2.79	0.21	0	0.87	0.11	0.47	0.3	0.52
	c102521f3p24764	-6.4	6.53e-06	0.00045	0.93	6.62	9.5	5.09	6.77	5.09	5.89	0.32	0.21	0.65	0.27	3.42	0.42	0.95
	c102543f5p04681	-5.6	0.000523	0.0001	76.03	662.38	580.02	455.41	404.57	675.03	514.96	45.85	32.81	75.22	73.17	148.79	48.97	177.01
	c102576f3p04898	-6.53	4.15e-06	0.00282	0.49	4.88	5.48	2.93	5.64	1.72	4.03	0.38	0.07	0.42	0.35	1.35	0.25	1.03
	c10257f1p0812	-5.75	5.44e-06	0.00641	1.36	5.55	5.87	3.25	1.86	7.65	8.73	1.39	0	2.8	0.28	0	0.36	1.14
	c102652f3p34730	-4.64	5.5e-06	0.00137	1.09	6.74	6.44	5.42	4.74	5.57	7.52	0.62	0.47	1.15	0.77	2.59	0.65	1.84
	c10266f1p0645	-5.62	4.08e-06	0.00916	0.57	1.07	5.36	4.08	6.25	5.34	3.01	0.13	0.35	0.59	0.35	0.9	0.51	1.75
	c102675f4p04392	-5.79	3.02e-06	0.01	0.9	0.95	3.09	3.45	4.33	3.05	3.42	0.32	0.15	0.45	0.2	1.02	0.42	0.75
	c102703f4p43974	-4.31	3.23e-05	0.00118	4.74	38.18	21.97	36.55	47.62	43.28	33.55	4.56	1.61	8.5	3.47	15.8	4.99	13.46
	c102719f3p34746	-6.47	5.19e-06	0.000758	0.48	4.88	5.76	4.18	7.15	4.14	5.89	0.46	0.09	0.19	0.66	2.53	0.48	0.6
	c10272f14p21141	-3.66	1.7e-05	0.000322	4.51	22.34	20.37	12.57	22.87	24.2	19.98	3.01	3.53	6.64	5.02	8.12	2.95	5.36
	c102759f4p14238	-7.83	1e-05	6.98e-05	0.98	8.79	10.89	7.69	9.43	8.73	12.69	0.37	0.61	0.61	0.65	3.32	0.31	1.7
	c10279f1p01763	-8.47	4.87e-06	0.000871	0.57	5.4	5.23	4.37	6.93	3.36	2.28	0.55	0.06	0.34	0.04	1.92	0.12	0.29
	c10280f2p01162	-5.93	8.47e-06	0.0015	1.26	8.79	14.26	7.38	9.86	6.4	5.25	0.94	0.1	1.76	1.09	2.98	0.43	1.68
	c102827f3p24728	-9.19	2.81e-06	0.01	0	4.58	2.38	2.7	0.43	3.71	2.29	0.61	0.02	0.05	0.69	0.03	0.17	0.17
	c10282f1p3823	-6.99	7.62e-06	0.00494	1.79	5.7	4.21	13.33	11.04	5.37	4.57	0.61	0.14	0.92	1.63	2.21	0.25	0.81
	c102857f3p34329	-5.38	9.39e-06	0.000756	1.93	7.97	14.44	5.44	11.56	7.84	11.21	0.79	0.72	1.61	1.01	2.71	1.27	3.1
	c102863f3p14212	-4.56	1.77e-05	7.6e-05	6	15.49	17.95	16.73	28.14	15.08	21.03	2.05	1.99	3.17	3.24	8.1	2.56	5.29
	c102864f3p34562	-6.38	3.08e-05	0.000254	6.06	20.42	49.27	35.05	23.58	30.35	26.85	5.82	1.96	2.74	3.39	9.51	1.98	4.61
	c10288f1p21436	-8.24	4.21e-06	0.0033	0.83	6.64	2.61	3.67	5.09	1.25	4.36	0.32	0	0.42	0.1	0.98	0.32	0.82
	c10289f1p01175	-5.17	3.43e-06	0.00997	1.12	1.4	4.2	4.93	4.39	2.9	3.6	0.54	0.54	0.31	0.48	0.94	0.3	1.25
	c102910f3p24861	-11.69	6.48e-06	0.00181	0.47	5.41	3.5	9.41	7.85	6.86	2.68	0.73	0.16	0.39	0.34	0.66	0.3	0.52
	c102924f2p04613	-7.18	7.97e-06	0.000508	1.09	10.47	7.34	4.6	10.53	8.54	5.26	0.72	0.46	0.54	0.95	1.97	0.56	1.47
	c102942f3p34716	-4.91	3.34e-05	0.000113	9.39	46.62	25.83	26.47	45.42	28.16	40.5	3.51	3.02	4.43	6.77	11.17	3.66	12.73
	c102944f3p24452	-5.64	4.81e-06	0.00569	1.22	3.62	4.41	4.35	5.69	2.2	8.84	0.4	0.55	0.48	0.4	2.3	0.36	0.88
	c102953f3p14928	-5.57	4.29e-06	0.00473	0.06	3.16	6.82	3.48	3.65	4.34	5.61	0.33	0.36	0.92	0.23	1.37	0.68	0.97
	c102992f3p14970	-5.26	1.27e-05	0.000843	3.59	17.85	13.47	10.31	20.38	9.69	7.58	1.7	1.37	1.39	1.68	5.61	0.79	3.22
	c102997f3p14444	-6.45	6.68e-06	0.000242	0.7	7.53	8.22	7.87	5.87	4.47	6.04	0.53	0.25	0.72	0.79	2.07	0.59	1.38
	c10299f3p21942	-6.28	7.9e-06	0.000316	0.9	6.24	9.87	8.14	10.57	5.61	7.37	0.75	1.04	1.68	0.46	1.74	0.6	1.48
	c1029f3p31483	-4.59	6.24e-06	0.0076	1.3	3.15	6.61	5.97	4.84	10.7	9.46	1.02	0.15	0.97	2.26	2.06	1.34	1.35
	c10300f1p0949	-5.75	3.94e-06	0.004	1.06	3.65	5.17	6.05	4.38	1.16	3.07	0.13	0.24	0.16	0.24	2	0.26	1.24
	c103021f3p51268	-6.33	8.22e-06	0.00661	1.01	9.3	1.25	7.15	11.63	8.27	12.17	0.26	1.15	0.66	1.64	1.11	0.33	2.88
	c10302f2p01117	-4.43	8.19e-06	0.01	2.55	5.9	5.04	9.75	11.4	5.31	16.18	0.19	0.9	5.36	1.8	0.96	0.37	3.08
	c103045f3p24368	-5.7	3.88e-06	0.00493	0.19	5.63	3.4	2.32	4.09	4.73	4.61	0.12	0.41	0.47	0.68	1.91	0.1	0.68
	c10305f1p01028	-7.64	3.47e-06	0.0047	0.54	4.72	3.51	1.78	2.94	3.76	3.65	0.2	0.11	0.15	0.22	1.13	0.28	0.65
	c10308f1p0868	-7.92	2.77e-06	0.01	0.32	2.6	2.49	2.18	4.21	3.02	1.76	0.1	0.13	0.35	0.26	0.95	0.19	0.12
	c103108f3p04635	-6.7	6.35e-06	0.000159	1.19	6.16	7.96	3.99	7.63	4.64	6.68	0.47	0.53	0.73	0.91	1.19	0.69	1.17
	c10313f1p1576	-6.77	1.22e-05	0.00014	2.71	9.62	11.76	7.5	18.57	11.72	12.29	1.09	0.39	1.44	2.45	1	1.73	2.85
	c103161f2p14697	-6.1	6.23e-06	0.00027	0.9	6.24	6.97	5.26	7.16	6.37	6.45	0.62	0.5	0.76	0.55	2.34	0.53	1.15
	c103170f2p24973	-5.92	5.68e-06	0.000723	0.87	6.66	7.98	4.56	5.43	3.3	6.49	0.4	0.47	1.02	0.39	2.25	0.58	0.85
	c103182f2p04832	-6.86	1.1e-05	0.01	0.83	7.33	22.76	12.36	10.15	7.52	6.66	0.86	0.21	1.42	1.23	2.94	0.37	2.83
	c103185f2p05045	-4.26	3.75e-06	0.01	0.87	3.39	5.19	3.45	5.36	3.82	4.37	0.62	0.33	0.73	0.59	2.12	0.59	1.22
	c103193f2p14846	-5.81	8.16e-06	0.00012	1.95	6.15	8.09	6.9	12.19	7.83	7.82	0.74	0.51	1.16	0.83	2.49	0.87	2.17
	c1031f2p0948	-5.01	3.53e-05	0.00581	10.28	52.12	40.5	35.11	19.28	59.12	15.98	1.68	1.77	9.99	3.93	18.76	2.02	8.24
	c103201f2p31651	-10.67	1.83e-05	1.66e-05	1.95	21.08	15.19	13.96	18.76	17.04	15.47	1.75	0.07	0.96	1.89	2.5	1.16	1.37
	c103234f2p14673	-6.05	5.54e-06	0.00646	0.49	7.72	6.36	3.85	2.24	5.08	8.77	0.55	0.07	1.18	0.14	1.79	0.74	1.23
	c103260f2p15053	-5.85	3.83e-06	0.00498	0.42	3.57	4.63	3.97	3.77	4.1	4.02	0.56	0.2	0.6	0.29	1.34	0.41	0.77
	c103273f2p04834	-6.07	1.17e-05	7.58e-05	2.24	12.08	11.46	12.81	15.17	12.19	6.87	0.83	0.67	1.71	1.14	3.47	1.25	2.93
	c103292f2p14517	-5.47	5.13e-06	0.00124	0.97	4.41	5.96	4.77	6.16	5.15	5.9	0.49	0.45	0.65	0.81	1.63	0.65	1.42
	c103298f2p24534	-4.23	4.07e-06	0.00814	0.79	5.73	4.14	3.77	5.7	3.93	4.75	0.47	0.27	0.82	0.98	2.13	0.43	1.7
	c103299f2p24448	-6.12	5.37e-06	0.000677	1.03	3.35	4.96	4.53	6.52	6.55	6.78	0.46	0.28	0.95	0.67	1.43	0.49	1.24
	c1032f8p01164	-6.5	3.93e-06	0.00755	0.87	3.43	2.73	4.94	7.26	2.13	2.51	0.22	0	0.13	0.51	1.63	0.25	0.93
	c103335f2p14442	-5.51	1.34e-05	0.000109	2.28	11.31	17.8	12.48	17.05	10.87	13.95	1.01	1.08	1.96	2.01	5.16	0.76	3.59
	c10339f3p11419	-6.11	3.95e-05	0.000166	8.48	56.17	21.96	38.07	51.68	36.55	34.95	2.18	1.42	4.75	6.66	11.3	3.25	11
	c103420f2p04334	-7.63	2.65e-06	0.01	0.19	4.2	1.96	2.59	1.48	1.72	3.88	0.29	0.23	0.3	0.27	0.27	0.18	0.56
	c103422f2p34255	-5.92	3.34e-06	0.00863	0.8	1.75	4.2	2.67	4.03	2.11	5.65	0.32	0.26	0.43	0.28	1.3	0.36	0.63
	c103427f2p04512	-6.49	1.88e-05	0.000354	3.42	12.75	26.91	13.63	26.89	17.85	14.68	2.02	1.19	1.81	1.57	5.29	2.22	3.8
	c10342f22p51462	-3.97	2.27e-05	0.01	2.75	22.87	35.52	29.67	37.28	16.99	19.66	1.17	0.91	6.33	1.32	12.43	1.87	17.47
	c103454f2p04410	-9.24	3.69e-06	0.00264	0.75	3.38	4.65	3.13	3.77	1.57	4.32	0.11	0.33	0.53	0.19	0.49	0.31	0.37
	c103458f2p14999	-4.79	4.41e-06	0.00411	0.68	3.94	5.95	4.53	4.77	3.68	6.37	0.8	0.33	0.71	0.86	2.27	0.39	0.88
	c103470f2p04979	-10.38	2.52e-06	0.01	0.17	4.28	0.99	2.28	2.94	2.44	1.45	0.13	0.09	0.12	0.03	0.3	0.38	0.35
	c103480f2p14871	-5.86	3.68e-06	0.00594	0.68	2.31	5.9	3.01	4.84	3.85	2.91	0.45	0.25	0.48	0.34	1.19	0.41	0.9
	c103481f2p45028	-6.76	3.61e-06	0.00864	0.62	2.07	6.55	2.19	2.08	4.09	4.15	0.12	0.22	0.32	0.3	1.81	0.18	0.28
	c103497f2p14193	-7.49	1.14e-05	4.13e-05	1.47	11.72	9.27	13.07	11.52	8.02	12.57	0.22	1.55	0.56	1.1	1.87	2.21	1.53
	c103508f2p14475	-6.24	4.58e-06	0.00171	0.86	4.29	6.76	4.12	3.85	3.75	5.21	0.57	0.45	0.59	0.66	1.25	0.32	0.78
	c103515f2p05044	-6.68	3.84e-06	0.00375	0.49	4.25	3.25	3.44	4.59	4.67	3.05	0.22	0.27	0.97	0.71	0.72	0.24	0.43
	c103519f1p31631	-5.96	7.08e-06	0.01	2.26	0.21	4.96	7.6	10.83	7.28	11.09	0.31	0.14	0.79	0.46	3.2	0.48	2.05
	c103565f2p03872	-5.4	1.12e-05	0.000238	2.8	14.28	16.77	12.05	7.29	9.91	9.08	1.42	0.95	1.74	2.54	3.44	0.93	2.35
	c103576f2p14884	-5.6	9.4e-06	5.81e-05	1.9	9.92	10.58	6.73	11.92	9.25	9.11	1.14	0.71	1.81	1.11	3.23	1.04	1.59
	c103590f2p25026	-7.12	3.51e-06	0.00515	0.66	2.48	5.41	2.99	3.73	3.15	3.04	0.43	0.2	0.35	0.38	0.3	0.48	0.88
	c10359f1p11107	-6.52	1.06e-05	0.0048	2.73	5.62	9.62	5.18	14.2	18.9	8.77	1.21	0.4	1.36	0.13	2.91	0.67	3.29
	c103601f2p04500	-6.76	4.19e-06	0.01	1.21	8.17	1.8	1.26	3.84	4.76	4.26	0.17	0.02	0.96	0.36	1.95	0.13	0.15
	c10360f1p01165	-6.32	4.28e-06	0.00256	0.32	5.8	2.97	3.6	4.44	2.84	6.21	0.65	0.1	0.39	0.77	1.06	0.43	0.75
	c103616f2p04265	-5.21	1.08e-05	0.0045	3.17	5.85	9.48	7.96	18.3	10.03	15.22	0.77	0.16	3.32	0.87	7	1.19	0.13
	c103617f2p24033	3.89	-5.13e-05	2.29e-05	39.47	5.33	1.29	7.6	0.09	9.93	8.04	41.14	41.98	42.12	41.87	35.78	39.99	36.08
	c103629f2p24878	-5.79	8.21e-06	5.1e-05	1.6	7.21	9.58	8.5	9.64	7.44	8.52	0.76	0.73	1.82	0.79	2.48	0.64	1.85
	c103635f2p04655	-8.07	3.39e-06	0.00479	0.49	3.42	1.7	2.16	5.01	4.21	3.13	0.09	0.1	0.39	0.35	0.62	0.24	0.71
	c103644f2p04593	-6.27	7.45e-06	0.000131	1.28	7.89	5.78	6.67	10.21	5.77	8.08	0.57	0.56	1.19	1.09	1.93	0.47	1.49
	c10364f1p01326	-5.51	1.11e-05	0.000141	1.73	8.23	12.72	9.78	10.73	13.1	14.55	0.76	0.59	1.65	1.23	3.99	1.38	3.25
	c103650f2p04493	-5.12	4.53e-06	0.00294	0.55	2.74	5.17	5.15	4.79	4.67	6.92	0.62	0.25	0.62	0.48	2.39	0.41	1.09
	c103668f2p14307	-4.31	1.64e-05	0.000114	4.09	17.93	19.81	13.26	21.19	17.38	19.95	2.28	0.81	3.23	3.19	9.22	2.29	5.31
	c10366f1p01215	-6.81	3.35e-06	0.00688	0.3	3	3.33	3.68	4.98	2.05	3.43	0.45	0.09	0.06	0.55	0.75	0.17	0.97
	c103677f2p05020	-9.41	1.21e-05	0.000869	1.11	9.11	17.72	10.61	15.03	11.63	4.82	0.66	0.4	1.83	0.55	2.49	0.17	1.35
	c103678f2p34345	-5.26	5.5e-06	0.01	0.74	2.79	7.93	5.63	8.52	1.87	8.28	0.39	0.8	0.54	0.7	2.11	0.68	1.58
	c103698f2p04431	-9.5	2.86e-06	0.00847	0.19	0.9	3.09	2.93	4.6	2.64	2.35	0.12	0.28	0.38	0.13	0.41	0.16	0.28
	c1036f10p31007	-4.52	1.55e-05	0.000813	3.56	16.18	19.35	19.55	23.41	16.45	7.32	2.41	2	3.84	2.37	6.24	1.57	5
	c103704f2p14756	-5.25	8.43e-06	0.01	1.18	6.19	5.46	6.11	17.08	10.09	8.82	0.9	0.68	1.24	1.61	3.86	0.98	1.2
	c103705f2p24614	-9.88	4.76e-06	0.01	0.46	9.32	5	5.29	2.29	1.94	2.89	0.15	0	0.11	0.23	1.65	0.26	0.36
	c103713f2p04399	-4.56	6.41e-06	0.01	0.73	9.99	5.93	4.64	8.78	10.33	3.09	0.76	0.25	0.91	1.47	3.08	0.95	2.11
	c103714f2p15266	-5.89	3.64e-06	0.01	2.23	0.95	4.66	3.94	6.17	0.97	3.67	0.42	0	0.23	0.14	2.78	0.17	0.1
	c103717f2p14794	-7.63	4.64e-06	0.00286	1.04	5.47	6.81	2.88	3.21	1.73	6.27	0.41	0.3	0.46	0.56	0.9	0.3	0.67
	c103733f2p34857	-6.97	5e-06	0.00483	1.04	3.06	4.15	5.74	8.91	2.15	5.05	0.76	0.05	0.3	0.46	1.14	0.6	1.02
	c103734f2p04532	-5.41	1.28e-05	4.75e-05	2.53	9.82	16.06	12.61	15.53	11.92	13.6	1.35	0.84	2.69	1.87	4.65	1.18	2.59
	c103744f3p41242	-6.88	1.47e-05	2.89e-05	2.07	17.87	14.06	13.13	12.49	14.67	14.89	1.38	0.81	0.43	1.98	2.33	0.74	5.3
	c103753f1p04614	-6.61	3.73e-06	0.00456	0.3	5.26	4.35	3.08	3.99	1.52	4.82	0.4	0.17	0.48	0.32	0.99	0.5	0.68
	c10375f1p11205	-4.79	8.41e-06	0.00182	3.73	4.16	15.65	7.34	9.29	8.8	7.02	0.38	0.46	1.25	1.6	3.56	0.76	3.66
	c103767f1p04715	-5.88	9.32e-06	6.33e-05	2.14	13.09	7.44	7.31	9.01	9.8	9.34	0.66	0.55	2.2	1.77	1.44	0.99	2.29
	c10376f1p01090	-5.29	1.84e-05	0.00547	2.53	21.95	32.71	11.48	14.81	25.83	11.35	2.42	0.92	3.68	1.91	6.91	1.53	5.42
	c103771f1p05034	-6.6	6.82e-06	0.000427	0.77	4.75	6.33	5.8	10.1	7.04	6.64	0.53	0.33	0.99	0.58	1.82	0.89	1.13
	c103773f1p0713	-3.63	1.26e-05	0.00188	2.44	13.54	13.69	22.27	16.71	14.05	11.83	2.28	0.94	5.18	5.3	6.34	2.44	3.58
	c103776f1p22633	-4.7	1.61e-05	0.00171	2.48	11.45	17.92	19.8	26.66	19.02	11.61	1.57	0.98	2.42	3.62	7.41	3.39	3.8
	c103780f1p04892	-8.53	6.75e-06	0.00132	1.05	8.78	10.11	2.47	5.48	5.52	5.88	0.57	0.16	0.36	0.73	1.6	0.28	0.9
	c103797f1p24616	-7.2	0.000101	0.000205	11.5	57.91	93.01	110.41	128.61	128.41	85.89	6.42	2.11	13.19	8.7	26.28	6.26	22.57
	c103806f1p04811	-4.13	4.7e-06	0.00634	0.92	5	8.74	5.71	3.64	4.49	4.16	0.51	0.07	1.16	0.44	2.6	0.8	2.31
	c10380f1p11039	-7.17	5.98e-06	0.000263	0.53	6.84	5.13	6.57	6.06	3.45	6.95	0.16	0.22	0.8	0.57	1.67	0.4	1.14
	c103811f1p04411	-7.55	4.13e-06	0.01	0.12	4.15	3.68	7.2	2.42	1.4	5.62	0.18	0.48	0.33	0.19	0.52	0.55	1.01
	c103815f1p14439	-5.93	3.98e-05	0.00258	11.05	65.61	15.22	37.77	56.21	44.85	20.98	1.92	2.71	4.44	7.74	7.72	6.3	11.63
	c103830f1p04814	-5.6	5.83e-06	0.000544	0.84	6.29	7.99	5.95	5.33	5.95	5.36	0.75	0.3	1.08	0.62	2.13	0.65	1.22
	c103842f1p24783	-5.22	3.38e-06	0.01	0.82	2.34	3.9	3.19	6.26	3.01	2.72	0.44	0.07	0.55	0.57	1.94	0.24	0.45
	c103844f1p24415	-6.55	3.26e-06	0.00811	0.44	3.33	3.16	2.6	3.93	3.34	3.45	0.2	0.23	0.34	0.37	1.2	0.29	0.46
	c103855f1p24419	-4.04	4.72e-05	3.63e-05	16.12	52.88	45.42	48.35	52.6	62.96	56.71	6.5	4.61	12.82	6.49	17.67	6.92	27.98
	c103875f1p04793	-4.71	4.66e-06	0.00333	0.74	5.45	6.17	3.86	6.44	4.91	4.31	0.51	0.62	1.3	0.69	1.4	0.85	1.39
	c103881f1p04329	-5.9	5.55e-06	0.000607	1.51	4.87	7.22	5.48	4.55	7.6	3.87	0.81	0.36	0.43	0.53	1.98	0.68	1.15
	c10388f1p01080	-6.12	3.04e-06	0.01	0.25	2.56	5.34	2.44	2.45	2.04	4.24	0.23	0	0.21	0.14	1.61	0.5	0.48
	c103890f1p25121	-6.86	4.35e-06	0.00183	1.31	2.7	6.44	2.33	6	3.82	4.15	0.79	0.74	0.41	0.52	0.63	0.31	0.49
	c103891f1p25126	-4.86	8.73e-06	0.000726	2.02	11.9	12.13	4.89	9.73	6.81	10.3	0.93	0.74	1.05	2.32	3.14	0.87	2.84
	c10389f1p01175	-5.1	3.58e-06	0.00867	0.62	3.07	4.51	4.4	3.62	5.47	1.99	0.49	0.09	0.7	0.44	1.81	0.32	0.78
	c103901f1p03946	-5.16	2.41e-05	3.15e-05	5.66	20.45	30.36	21.8	24.13	24.58	30.47	3.18	1.64	4.36	2.59	10.19	2.88	5.65
	c10391f7p2705	-6.56	9.96e-05	2.85e-05	23.01	80.68	116.57	124.02	90.59	70.09	109.13	3.02	3.01	9.53	10.43	27.38	4.29	35.98
	c103928f1p05072	-5.87	6.17e-06	0.000501	1.27	5.34	6.33	4.8	9.39	7.03	4.26	0.71	0.49	0.52	0.88	1.86	0.7	1.38
	c10393f1p0713	-8.25	2.92e-06	0.00907	0.25	4.02	1.97	2.86	2.58	2.64	3.03	0.17	0.15	0.1	0	0.68	0.23	0.77
	c103947f1p14534	3.55	-0.000144	0.000138	136.61	18.17	4.48	21.8	1.88	24.64	20.98	118.81	115.95	126.51	121.69	107.52	121.4	99.52
	c103949f1p34375	-4.05	7.15e-06	0.00775	1.18	3.96	10.69	8.84	6.31	7.32	12.36	1.08	0.59	1.68	1.57	3.63	1.42	2.53
	c103958f3p111766	-4.02	9.3e-06	0.00515	2.08	14.82	12.17	7.2	10.99	9.06	9.52	1.14	0.76	1.33	1.1	2.9	0.59	8.55
	c103973f1p1951	-4.76	4.88e-06	0.01	0.89	6.88	6.96	5.15	6.76	5.18	0.75	0.67	0.48	0.41	1.28	2.22	0.85	0.94
	c103975f1p03930	-4.93	2.73e-05	0.00153	5.02	21.01	24.14	21.06	43.03	40.07	27.18	2.74	1.07	7.55	3.57	12.66	2.34	6.91
	c103993f1p04019	-5.16	4.18e-06	0.00439	0.96	5.01	6.43	3.59	4.36	4.12	3.18	0.6	0.39	0.79	0.67	1.11	0.58	1.22
	c104008f1p24656	-4.75	5.1e-06	0.00194	1.14	3.93	5.5	5.07	7.75	6.15	4.97	0.81	0.34	0.78	0.92	1.63	0.81	1.98
	c104018f1p04770	-4.21	8.8e-06	0.00563	0.98	9.56	8.14	5.09	14.85	10.47	12.6	0.95	1.29	2.39	2.6	4.37	0.63	2.43
	c104032f1p05410	-3.37	1.11e-05	0.00486	3.28	17.32	17.07	14.09	13.87	10.86	9.55	1.16	1.01	2.36	2.29	7.94	1.75	9.02
	c104050f1p04723	-5.99	0.000449	0.000189	62.99	660.32	506.82	468.53	419.75	383.57	349.34	32.2	33.19	49.65	26.02	202.75	35.12	96.75
	c104051f1p04543	-5.58	5.65e-06	0.00308	0.62	8.37	7.28	2.35	4.93	6.21	6.1	0.47	0.54	0.84	1.61	1.64	0.48	0.84
	c104058f1p04835	-7.43	7.24e-06	0.00107	1.06	4.62	10.17	8.97	5.97	3.56	8.77	0.58	0.23	0.98	0.47	2.31	0.31	0.93
	c104060f1p05047	-5.48	1.17e-05	0.0016	1.49	16.45	18.44	9.01	12.99	8.12	9.53	0.61	0.47	2.3	1.4	3.82	0.86	4.43
	c104066f1p04677	-7.48	5.46e-06	0.01	0.33	3.31	3.98	5.17	10.71	6.1	2.98	0.21	0.26	0.56	0.51	1.19	0.45	1.17
	c104076f1p04675	-6.33	3.89e-06	0.00383	0.83	3.52	3.12	3.34	5.7	3.07	4.72	0.35	0.07	0.82	0.56	0.82	0.37	0.85
	c104078f1p05002	-6.06	0.00046	0.000135	74.96	491.05	528.1	421.94	461.39	636.19	285.3	31.57	18.38	75.98	48.7	153.76	34.43	115.2
	c104079f1p04739	-4.64	3.76e-06	0.00862	0.91	4.13	2.25	4.21	5.32	5.21	3.49	0.18	0.26	0.64	0.33	1.85	0.85	1.4
	c104080f1p04569	-5.86	4.74e-06	0.00165	0.7	6.02	5.38	3.43	5.06	4.01	5.73	0.34	0.44	0.53	0.61	1.17	0.45	1.65
	c104083f1p04536	-6.37	2.95e-06	0.01	0.4	2.37	4.29	2.11	4.11	2.82	2.45	0.31	0.15	0.4	0.46	0.62	0.34	0.63
	c104091f1p05164	-5.12	4.28e-06	0.00384	1.41	3.83	7.04	2.87	4.83	4.65	3.63	0.71	0.5	0.19	0.37	2.11	0.44	1.18
	c10409f1p1667	-6.17	4.23e-06	0.00262	1.1	6.5	3.03	2.64	6.05	3.93	3.33	0.31	0	0.57	0.89	0.99	0.31	1.23
	c104109f1p04483	-6.29	3.35e-06	0.00803	0.47	3.39	4.94	3.64	4.93	1.23	2.57	0.59	0.17	0.1	0.13	1.29	0.25	0.83
	c10410f2p21173	-7.05	6.66e-06	0.00149	1.33	2.96	7.26	9.23	4.51	9.41	5.21	0.79	0.1	0.84	1.08	2.12	0.18	0.57
	c10411f1p11458	-4.85	6.53e-06	0.000865	1.58	5.71	4.65	7.75	6.92	5.78	10.49	0.75	0.54	1.82	0.71	3.46	0.23	1.34
	c104129f1p04763	-9.87	8.35e-06	0.000488	0.37	7.99	4.71	7.65	9.73	11.24	5.84	0.64	0.14	0.61	0.41	0.46	0.36	2.18
	c10415f1p01094	-6.1	3.7e-06	0.01	0.92	3.33	4.75	2.78	2.65	6.94	1.52	0.15	0.51	0	0.48	2.12	0.49	0
	c104166f1p04674	-6.32	4.38e-06	0.0021	0.54	2.79	4.31	4.56	5.08	4.47	5.6	0.31	0.19	0.6	0.54	1.4	0.32	0.97
	c10417f1p01236	-6.59	2.27e-05	4.36e-05	5.07	25.59	27.98	19.97	24.13	24.18	12.74	0.58	0.73	1.97	2.23	7.51	2.06	6.13
	c1041f15p31253	-4.62	9.29e-06	0.00112	1.98	8.85	13.7	8.52	14.58	6.71	8.31	0.57	0.71	3.32	1.78	2.97	0.56	3.65
	c104207f1p04456	-5.82	6.06e-06	0.000761	1.07	3.76	9.26	5.82	6.51	4.72	6.71	0.47	0.5	0.71	0.45	2.85	0.54	0.99
	c104213f1p04763	-5.56	3.07e-06	0.01	0.71	1.86	3.06	3.77	3.18	3.97	3.18	0.15	0.16	0.7	0.63	0.97	0.23	0.71
	c104214f1p24501	-5.69	6.46e-06	0.000254	1.07	6	6.4	6.77	6.17	7	8.03	0.71	0.35	1.24	0.99	1.9	0.59	1.53
	c104222f1p04327	-6.43	1.06e-05	4.81e-05	1.39	8.39	13.14	11.26	9.89	10.1	10.65	0.9	0.64	1.2	0.43	3.74	0.86	2.31
	c104237f1p04708	-4.73	4.1e-06	0.00583	1.11	4.49	5.39	4.5	4.18	3.99	4.1	0.25	0.5	1.01	0.93	1.93	0.35	0.89
	c104247f1p14418	-5.17	1.7e-05	0.000247	2.49	14.19	22.16	14.47	24.63	15.92	17.57	2.02	1.16	3.78	2.05	6.26	1.72	4.53
	c104268f1p134359	-3.99	0.000178	0.01	32.38	252.54	318.19	220.03	295.1	88.98	100.1	28.39	15.8	24.26	41.85	76.98	61.22	78.99
	c10426f8p1661	-10.2	6.02e-06	0.0047	1.25	3.4	6.98	4.39	5.33	2.09	10.71	0.25	0.34	0.69	0.34	0.87	0.31	0.54
	c104303f1p04581	-4.89	7.37e-06	0.000189	1.68	7.22	8.05	7.51	6.82	6.14	10.82	0.95	0.39	1.68	1.12	2.76	1	1.97
	c104314f1p04949	-5.11	4.05e-06	0.0047	1.06	4.4	3.9	3.26	7.17	2	4.4	0.52	0.23	0.14	1.5	1.53	0.79	0.41
	c104315f1p34513	-10.96	2.68e-06	0.00941	0.22	2.34	2.72	1.83	3.66	3.09	1.48	0.06	0.02	0.18	0.08	0.71	0.25	0.08
	c104321f1p04746	-5.84	3.42e-06	0.00797	0.66	2.9	3.39	3.81	3.37	3.57	4.08	0.37	0.12	0.48	0.27	1.17	0.39	0.93
	c104333f1p04426	-6.25	1.09e-05	0.000376	1.56	14.19	12.08	7.94	12.8	5.96	12.92	0.87	0.81	1.37	0.56	3.37	1.15	2.67
	c104345f1p34840	-5.11	1.14e-05	3.37e-05	2.88	10.72	14.55	8.81	13.12	10.95	12.81	1.3	0.81	2.37	1.17	3.97	1.78	3.04
	c10437f1p01030	-7.31	4.45e-06	0.00297	0.51	1.34	6.55	3.59	4.6	4.43	5.38	0.7	0	0.08	0.41	1.83	0.14	0.45
	c104390f1p84746	-5.69	3.33e-05	0.01	8.03	24.17	31.74	38.69	13.3	62.83	31.21	0.66	1.77	4.69	0.93	5.94	2.45	20.44
	c10440f1p0585	-4.31	2.57e-05	0.00294	4.71	13.93	30.59	27.76	41.6	35.16	25.43	3.72	1.15	4.53	3.82	15.27	4.33	8.79
	c104412f1p14309	-4.94	3.41e-06	0.01	1	2.49	3.35	3.55	4.71	3.68	3.9	0.41	0.13	0.63	0.31	1.86	0.35	0.91
	c104433f1p21538	-5.17	6.66e-06	0.0011	0.9	8.12	8.45	8.09	4.18	4.85	8.41	0.6	0.29	0.79	1.26	2.9	0.27	2.21
	c104438f1p14564	-5.06	6.58e-06	0.00174	3.46	3.83	4.23	9.02	5.16	6.07	10.86	0.48	0.1	0.25	0.67	3.75	0.51	2.68
	c104441f1p04929	-5.04	3.65e-06	0.0084	0.55	3.28	4.91	3.38	4.57	3.87	3.82	0.57	0.11	0.63	0.49	1.7	0.46	0.88
	c104445f1p04301	-4.84	1.12e-05	7.28e-05	2.45	9.16	13.52	9.66	13.79	12.67	13.12	1.93	1.56	1.51	2	4.22	1.43	2.72
	c104451f3p45392	-5.74	8.67e-06	0.00188	2.2	7.49	11.27	9.36	13.19	8.96	2.32	0.52	1.04	2.01	1.12	2.53	0.19	2.14
	c104455f1p04585	-5.7	6.49e-06	0.00025	1.24	6.17	7.95	5.79	8.54	6.6	5.45	0.66	0.48	0.89	0.93	1.91	0.94	1.5
	c104460f1p14569	-8.24	7.02e-06	5.99e-05	1.16	5.63	8.87	5.81	5.57	8.25	5.4	0.59	0.36	0.78	0.43	1.25	0.54	0.99
	c10446f4p0469	-6.38	3.92e-05	4.88e-05	7.63	36.89	31.63	44.34	49.36	26.73	47.03	2.58	1.67	6.28	9.66	2.82	3.27	11.92
	c104512f1p22265	-4.33	9.98e-06	0.000609	2.52	8.8	6.37	12.06	13.47	14.25	11.04	1.2	0.94	2.91	2	4.45	0.99	3.33
	c104521f1p04943	-5.21	1.31e-05	0.01	1.71	6.77	22.42	11.19	13.11	22	8.6	1.97	0.52	0.57	1.45	7.68	0.47	3.82
	c10453f4p0916	-4.49	7.57e-06	0.00263	1.5	9.64	6.61	8.85	12.92	5.72	6.37	0.37	0.24	0.99	1.3	3.79	1.27	3.53
	c104542f1p04368	-4.85	3.66e-06	0.00882	0.52	5.41	6.04	3.93	3.19	2.12	2.83	0.8	0.33	1.16	0.52	1.12	0.19	0.84
	c104561f1p34697	-6.06	2.93e-05	0.000196	6.58	30.4	41.3	23.97	36.91	28.45	16.55	3.13	1.59	2.68	1.14	13.41	3.43	4.97
	c104565f1p04828	-8.26	4.54e-06	0.000993	0.52	3.83	4.25	4.67	6.03	4.96	2.71	0.21	0.1	0.62	0.32	0.64	0.47	0.9
	c104568f1p04296	-5.02	5.4e-06	0.00162	0.98	3.67	7.05	7.67	6.87	3.73	5.14	0.75	0.36	1.06	0.45	2.66	0.67	1.04
	c104571f1p04261	-7.2	1.08e-05	0.000805	0.58	15.77	9.03	5.86	10.16	11.97	11.64	0.45	0.33	1.03	0.74	2.73	0.89	2.87
	c104573f1p04319	-5.82	3.88e-06	0.0047	0.66	3.36	5.13	3.16	4.69	3.86	3.92	0.37	0.26	0.3	0.62	1.76	0.28	0.68
	c104596f1p05051	-6.05	3.33e-06	0.00974	0.74	0.89	5.85	2.87	4.28	2.84	3.05	0.42	0.11	0.45	0.07	1.18	0.29	0.87
	c104610f1p04906	-5.42	8.02e-06	7.38e-05	1.79	7	9.21	7.54	10.57	6.29	8.52	0.67	0.51	1.25	1.09	2.65	1.39	1.82
	c104631f1p14600	-4.88	1.15e-05	0.0007	2	8.31	14.44	11.41	18.38	11.82	10.51	1.57	0.93	2.08	1.07	4.83	1.12	4.14
	c104666f1p24647	-5.44	4.54e-06	0.00245	1.02	5.64	5.09	3.99	4.58	5.44	3.7	0.34	0.28	0.87	0.3	1.42	0.65	1.55
	c104667f1p04903	-4.53	4.61e-06	0.00379	1.33	6.12	5.8	4.86	6.1	4.14	3.43	0.48	0.3	0.83	1.4	1.81	0.52	1.69
	c104669f1p24425	-6.88	4.8e-06	0.00769	0.58	1.56	6.25	7.2	3.68	3.01	6.71	0.32	0.55	0.7	0.25	1.58	0.16	0.66
	c104670f1p04681	-5.69	6.95e-06	0.000192	1.57	8.6	8.14	5.85	9.05	5.47	4.85	0.74	0.1	0.89	0.7	2.84	0.84	1.55
	c104687f1p14780	-6.06	1.57e-05	7.53e-05	2.6	20.26	17.71	11.8	17.28	11.08	17.29	1.36	1.05	2.39	1.67	4.82	1.58	3.29
	c10468f1p01021	-5.04	6.94e-06	0.00163	1.35	10.69	6.64	4.5	8.88	4.73	8.57	1.02	0.44	1.41	0.87	1.62	0.98	2.67
	c104691f1p15302	-10.76	9.92e-06	0.000135	0.53	6.8	12.28	8.36	8.09	12.03	7.89	0.77	0.25	1.47	0.35	0.93	0.62	0.82
	c104699f1p04723	-5.17	4.1e-06	0.00462	0.81	3.76	5.51	4.39	3.1	4.15	5.31	0.49	0.26	0.81	0.34	1.81	0.41	1.12
	c1046f5p0835	-5.08	1.78e-05	0.000161	2.1	14.99	21.83	19.82	17.25	18.73	22.36	1.46	1.08	5.27	2.41	6.95	1.5	4.38
	c104703f1p05232	-4.61	5.33e-06	0.00168	1.29	6.85	7.02	6.62	6.47	5.09	3.17	0.64	0.45	0.49	0.76	2.8	0.65	2.14
	c104705f1p45092	-5.04	1.43e-05	0.000656	3.33	15.6	13.24	13.17	24.91	12.28	11.66	1.58	0.66	1.84	2.26	6.48	2.2	3.67
	c104708f1p45111	-4.87	0.000106	0.000287	23.76	129.62	113.23	96.33	80.31	161.45	105.59	12.73	4.33	15.15	17.75	45.35	9.66	41.01
	c104721f1p04616	-5.82	3.49e-06	0.00761	0.8	3.27	3.69	3.03	5.9	2.6	3.07	0.5	0.29	0.67	0.56	0.86	0.45	0.5
	c104723f1p03272	-5.07	7.54e-06	0.00205	1.7	7.95	5.57	7.92	13.05	8.56	4.49	0.87	0.81	1.6	1.33	2.78	0.48	1.85
	c104729f1p14768	-4.92	7.6e-06	0.000121	1.71	8.29	5.18	8.46	8.11	8.25	9.55	1.09	0.42	1.23	1.12	2.97	0.96	2.26
	c104734f1p04829	-5.34	3.46e-06	0.01	0.46	1.29	3.97	2.59	6.18	4.59	3.1	0.55	0.28	0.75	0.78	0.41	0.39	0.99
	c104739f1p04443	-5.98	4.16e-06	0.00729	0.37	2.07	4.54	2.34	4.17	6.02	6.32	0.4	0.5	0.43	0.22	1.41	0.25	1.11
	c104742f1p05105	-6.15	1.33e-05	0.000108	1.63	16.36	10.79	16.32	10.14	14.26	12.77	0.39	0.46	2.12	1.95	3.11	1.43	3.93
	c10475f1p01519	-6.72	4.57e-06	0.00476	0.36	6.49	3.6	3.38	6.38	1.9	5.66	0.69	0.81	0.1	0.78	0.54	0.3	0.91
	c104766f1p05124	-4.45	6.09e-06	0.000861	1.78	7.27	6.23	5.14	8.7	5.79	7.22	0.73	0.66	1.45	1.18	2.53	0.86	2.05
	c104770f1p94534	-6.24	3.97e-05	0.000128	5.63	36.57	50.81	52.57	39.27	39.55	24.42	2.8	1.68	6.63	5.63	11.07	3.77	8.31
	c104794f1p11857	-4.95	3.84e-06	0.00685	1.78	4.86	2.25	3.24	1.56	4.39	6.89	0.7	0.18	0.33	0.36	2.05	0.38	1.05
	c104805f1p04463	-9.05	2.98e-06	0.0088	0.36	2.21	3.62	3.37	4.74	2.34	0.42	0.49	0.03	0.11	0.09	0.94	0.14	0.11
	c104814f1p05276	-6.6	3.45e-06	0.00621	0.83	2.73	4.01	3.01	4.27	2.09	4.46	0.16	0.37	0.78	0.48	0.75	0.22	0.48
	c104829f1p04955	-5.35	5.58e-06	0.01	1.15	4.7	10.34	5.09	4.21	1.87	8.69	0.82	0.09	1.46	0.53	2.56	0.4	0.88
	c104848f1p05403	-5.56	3.69e-06	0.00652	0.65	2.3	5.84	4.69	3.45	2.45	4.51	0.56	0.13	0.44	0.28	1.68	0.45	0.74
	c104865f1p04608	-4.89	3.85e-06	0.00716	0.77	4.26	4.69	3.07	3.77	4.67	4.58	0.46	0.48	1.03	0.42	1.32	0.53	1.05
	c10486f1p0606	-5.32	8.08e-05	4.68e-05	17.84	98.95	82.61	66.32	65.32	86.27	108.38	5.86	3.13	22.05	12.86	21.49	8.34	25.02
	c104911f1p04413	-6.76	1.99e-05	0.00484	4.04	25.45	5.3	15.12	31.9	27.05	13.19	1.28	1.24	0.89	1.7	4.87	1.72	6.34
	c104927f1p14232	-4.5	9.67e-06	0.00198	4.86	7.32	10.59	11.27	8.54	16.94	5.74	1.61	0.26	0.75	1.56	6.91	0.92	2.49
	c10492f1p01619	-5.58	3.65e-06	0.00668	1.08	5.88	3.65	2.21	3.65	1.96	5.06	0.39	0.07	0.7	0.64	1.68	0.15	0.57
	c104939f1p04452	-7.12	4.1e-06	0.00233	0.43	3.77	3.17	4.69	4.46	4.61	3.89	0.46	0.18	0.48	0.3	0.65	0.48	0.98
	c104940f1p35178	-5.24	1.87e-05	0.00508	3.76	23.78	30.86	16.24	16.27	5.28	27.23	1.79	1.9	3.32	4.14	7.64	2.5	2.24
	c104973f1p14834	-9.7	2.87e-06	0.00808	0.4	1.22	3.87	3.04	3.72	2.48	1.89	0.16	0.05	0.14	0.15	0.77	0.11	0.33
	c104998f1p05051	-4.54	4.01e-06	0.00714	1.16	4.83	5.85	3.61	4.69	3.74	3.71	0.54	0.27	0.88	0.43	2.47	0.49	1.01
	c105001f1p04545	-6.82	3.1e-06	0.00915	0.46	2.61	2.08	2.88	3.66	5.04	2.22	0.31	0.02	0.46	0.39	0.65	0.25	0.69
	c105034f1p04220	-5.26	5.27e-06	0.00116	1.25	6.36	5.7	5.25	4.69	7.04	4.17	0.66	0.41	0.63	0.57	2.02	0.74	1.52
	c105036f1p05103	-5.82	1.51e-05	0.000235	2.52	15.94	22.29	9.28	13.31	14.52	17.71	1.22	1.53	1.7	3.29	4.8	1.19	2.69
	c105044f1p24618	-5.13	1.12e-05	0.00124	1.27	11.79	15.88	12.65	16.17	7.35	8.4	1.58	0.7	1.87	1.35	3.76	1.93	3.14
	c105094f1p15067	4.17	-0.00352	5.53e-05	2539.95	333.05	97.7	475.08	57.45	560.85	408.68	3417.05	3222.47	2460.22	2631.95	1848.76	3026.33	2066.12
	c105105f1p04618	-8.18	3.11e-06	0.01	0.99	1.72	4.64	5.14	2.85	2.26	0.45	0.04	0.07	0.54	0.03	0.8	0.03	0.7
	c10510f6p11086	-6.33	1.21e-05	0.003	2.96	14.5	12.47	18.16	6.84	3.93	16.48	0.85	0	1.32	0.62	5.09	1.57	2.46
	c10512f3p51148	-4.82	2.79e-05	0.00383	5.44	33.68	41.36	17.39	32.62	41.72	15.26	3.79	0.49	1.65	3.57	15.27	4.16	9.94
	c105144f1p05176	-6.14	3.36e-06	0.00804	0.47	2.78	3.11	3.15	4.46	2.43	4.79	0.36	0.2	0.34	0.43	1.15	0.23	0.74
	c105149f1p04488	-5.05	5.54e-06	0.000958	1.88	5.64	7.11	3.95	6.57	7.17	4.24	0.44	0.15	0.78	1.54	2.17	0.68	1.48
	c105163f1p04784	-6.52	5.7e-06	0.000557	1.44	3.12	6.19	3.44	8.33	5.83	6.28	0.76	0.21	0.59	0.65	1.33	0.71	1.05
	c105170f2p05055	-5.27	3.85e-06	0.00601	0.56	3.88	4.34	2.31	4.11	5.27	4.76	0.44	0.13	0.97	0.97	0.69	0.26	1.32
	c105171f1p25266	-6.39	1.03e-05	0.000134	1.38	8.42	12.95	13.47	9.4	9.9	7.94	0.74	0.38	1.26	1.6	3.31	0.61	2.04
	c105190f1p04365	-5.32	5.79e-06	0.000623	1.49	4.5	5.09	6.02	6.72	8.2	5.56	0.62	0.61	1.08	0.77	2.11	0.52	1.36
	c105208f1p04928	-6.56	1.55e-05	0.01	0.65	22.46	14.71	27.47	10.68	6.36	14.34	1.3	1.79	0.41	2.21	1.55	0.6	6.89
	c105213f1p94440	-5.6	4.11e-05	0.000174	8.22	32.52	43.35	33.84	64.23	46.35	35.6	3.71	2.26	6.36	4.25	15.22	5.46	9.89
	c105227f1p34618	-4.42	3.98e-06	0.00789	1.15	3.68	5.63	3.52	4.89	3.62	5.15	0.53	0.49	0.82	1.13	1.79	0.41	1.09
	c10522f1p0837	-7.89	2.83e-06	0.01	0.45	2.79	3.75	1.17	2.81	2.22	3.78	0.1	0	0.19	0.28	0.92	0.15	0.51
	c105238f1p04228	-5.68	3.1e-06	0.01	0.6	3.65	3.26	2	5.9	2.62	1.42	0.39	0.2	0.36	0.34	1.22	0.33	0.59
	c105246f1p54986	-5.74	1.03e-05	0.00202	0.98	16.79	7.93	7.43	13.62	8.74	9.95	0.87	1.12	1.11	1	4.77	0.95	1.58
	c10524f1p0633	-3.58	1.1e-05	0.000907	5.37	15.06	8.89	8.23	12.35	11.99	19.77	1.06	1.59	2.27	3.41	5.75	3.94	4.79
	c105260f1p04146	-5.01	4.47e-06	0.00327	1.31	5.29	4.51	4.01	4.79	4.35	5.42	0.62	0.27	0.9	0.74	1.62	0.66	1.11
	c105268f1p04337	-5.85	4.26e-06	0.00287	1.07	5.03	4.55	3.58	4	3.18	5.71	0.35	0.08	0.86	0.56	0.98	0.67	1.13
	c10529f1p01633	-4.41	4.69e-06	0.00367	1.18	4.44	5.01	6.68	4.46	4.54	6.1	0.46	0.27	0.69	0.77	2.82	0.51	1.82
	c1052f6p01255	-5.25	7.09e-06	0.000248	2.86	5.53	4.83	6.95	9.95	7.37	8.64	0.8	0.27	0.3	0.36	3.82	1.39	1.84
	c105302f1p11278	-6.91	1.22e-05	0.01	0.65	14.9	21.31	6.29	6.11	7.87	18.14	0.36	0.96	1.72	3.32	2.26	0.88	1.41
	c105310f1p34405	-6.6	3.17e-06	0.00883	0.73	2.24	2.23	3.73	3.97	2.85	3.78	0.33	0.13	0.15	0.49	1.18	0.35	0.33
	c105315f1p04970	-5.53	3.81e-06	0.00585	0.53	3.86	5.86	3.19	4.29	3.35	3.71	0.38	0.42	0.56	0.61	1.32	0.4	0.8
	c105327f1p04760	-5.79	4.94e-06	0.00221	0.73	3.59	8.27	3.65	4.01	5.25	5.35	0.47	0.21	0.65	0.69	2.01	0.24	1.06
	c105346f1p44268	-5.62	3.76e-06	0.01	0.47	6.96	4.61	2.97	4.77	1.96	2.11	0.93	0.16	0.83	0.43	1.37	0.07	0.46
	c10534f4p21253	-6.04	1.13e-05	2.75e-05	4.11	15.64	7.72	8.05	13.18	10.14	11.09	0.64	0.72	2.3	1.49	2.64	1.63	2.17
	c105371f1p04769	-5.1	3.93e-06	0.00597	0.46	5.76	3.92	3.3	3.43	5.34	3.92	0.53	0.49	1.08	0.51	1.23	0.5	0.78
	c10537f1p0783	-14.01	9.01e-06	0.01	0.7	5.54	12.53	2.68	16.91	6.88	4.79	0.59	0.14	0.19	0.29	0.85	0.53	0.98
	c105402f1p05092	-6.09	3.02e-06	0.01	0.5	2.65	3.74	2.18	3.93	3.25	2.88	0.36	0.27	0.34	0.54	0.82	0.21	0.61
	c105411f1p14488	-3.78	8.91e-06	0.00452	1.57	14.39	9.6	8.84	6.79	12.96	10.92	1.14	1.22	2.53	1.23	4.53	0.52	6.04
	c105412f1p11948	-6.02	1.3e-05	3.96e-05	2.03	15.11	12.8	11.17	14.61	10.47	15.11	1.61	1.15	2.29	0.73	4.58	0.7	2.45
	c105419f1p04533	-5.27	4.16e-06	0.00427	0.63	5.22	5.83	2.78	4.71	4	4.31	0.38	0.34	1.03	0.51	1.29	0.54	1.13
	c10544f1p31582	-4.39	1.69e-05	0.00345	5.23	13.26	15.88	15.87	28.53	28.18	9.67	1.62	1.42	5.36	5.37	2.46	4.36	5.98
	c105457f1p25036	-6	8.02e-06	0.00185	1.33	13.72	7.84	5.52	8.5	4.71	8.6	0.61	0.24	0.95	1.67	2.51	0.81	1.58
	c10545f1p0597	-5.88	3.41e-05	2.85e-05	8.01	21.2	44.49	35.7	36.54	33.06	36.56	2.32	2.63	3.81	5.61	11.64	3.27	7.4
	c105483f1p04359	-5.53	0.000502	1.85e-05	88.02	567.34	557.01	510.76	513.57	538.76	468.79	47.55	26.11	69.75	71.38	144.22	42.75	184.94
	c1054f6p0581	-7.02	1.15e-05	0.00101	0.95	10.74	18.14	9.08	6.73	10.45	13.64	0.65	0.58	1.04	2.18	2.85	0.43	2.21
	c105508f1p04207	-6.09	3.53e-06	0.00666	0.33	3.65	4.61	4.7	1.67	3.72	3.75	0.27	0.24	0.86	0.86	0.23	0.7	0.52
	c10552f5p51023	-6.14	8.81e-06	5.74e-05	1.53	9.32	9.31	9.66	9.61	9.31	5.71	0.78	0.55	0.74	0.66	3.64	0.65	1.86
	c105539f1p01469	-18.23	4.87e-06	0.000385	0.06	6.49	5.01	4.05	3.77	4.41	2.18	0.31	0.3	0.1	0.3	0.06	0.03	0.31
	c105547f1p04585	-7.64	3.73e-06	0.00337	0.63	2.82	4.05	2.6	4.88	3.22	4.24	0.35	0.17	0.29	0.2	0.99	0.31	0.62
	c10558f1p01790	-4.69	4.24e-06	0.00525	1.08	4.74	6.12	4.23	6.34	2.54	3.88	0.49	0.19	0.72	0.71	2.17	0.72	1.18
	c105594f1p04909	-4.89	4.07e-06	0.00535	1.08	2.84	3.41	5.69	4.2	5.33	4.58	0.47	0.41	0.95	0.3	2.24	0.66	0.52
	c10559f1p0624	-6.86	6.21e-05	0.000626	13.7	103.36	39.09	63.75	78.8	40.93	42.77	5.71	4.13	10.32	6.92	11.93	6.06	10.71
	c105600f1p13863	-5.38	7.22e-06	0.000311	1.36	6.33	6.54	6.2	10.73	6.39	8.52	1.05	0.52	0.96	0.87	1.56	1.06	2.54
	c105605f1p1939	-8.03	1.07e-05	0.00731	0.2	7.39	20.29	6.84	12.35	9.7	6.81	0.94	0.24	0.56	1.35	2.38	0.27	2.19
	c10560f1p1622	-5.21	8.95e-06	0.00444	0.3	10.59	10.67	10.99	14.19	5.1	6.93	0.74	0.36	1.46	1.08	4.26	0.4	2.97
	c105619f1p04361	-5	9.6e-06	0.00102	1.53	8.68	15.74	7.95	11.21	8.17	10.08	1.02	0.44	1.23	1.21	5.16	1.23	2.4
	c10561f4p21050	-7.95	1.35e-05	1.06e-05	2.54	15.34	13.73	10.69	13.2	12.74	10.98	0.28	0.64	2.02	0.85	3.93	1.07	1.17
	c105646f1p04525	-5.31	6.57e-05	0.00169	12.6	81.5	117.88	68.09	69.14	44.69	39.16	8.11	3.89	18.22	6.85	19.28	6.33	18.92
	c105658f2p04280	-7.71	3.18e-06	0.00691	0.51	3.96	2.26	5.59	2.56	2.09	2.11	0.2	0.05	0.46	0.38	0.39	0.09	0.91
	c105662f1p05067	-6.06	7.01e-06	0.00126	1.32	11.97	6.78	4.76	7.58	5.77	5.43	0.37	0.46	0.88	1.89	1.63	0.47	1.49
	c10566f2p51656	-5.1	2.26e-05	0.01	2.83	24.49	16.03	16.82	44.97	30.82	13.84	2.96	1.49	3.61	2.65	9.98	3.71	4.99
	c105677f1p06976	-5.96	3.63e-06	0.00601	0.55	3.7	4.03	2.74	4.09	4.79	3.11	0.47	0.22	0.53	0.21	1.42	0.24	0.77
	c10568f1p01372	-4.63	8.06e-06	0.000361	1.6	9.07	6.39	10.02	11.45	6.92	8.48	0.85	0.73	1.54	1.84	3.3	1.18	2.2
	c105698f1p05134	-8.36	2.32e-05	0.00207	2.71	37.35	17.42	20.97	32.39	15.66	11.27	1.4	0.39	0.84	2.64	5.79	1.22	4.19
	c1056f7p0825	-4.12	7.85e-06	0.00536	1.45	7.78	8.75	6.15	10.24	7.86	12.81	0.56	0.27	1.84	0.99	6.72	0.86	2.12
	c105705f1p04702	-4.57	4.49e-06	0.00418	0.66	6.12	4.42	2.63	4.64	6.58	5.68	0.32	0.1	1.13	0.92	1.6	0.42	2.25
	c105721f1p14382	-6.16	4.64e-06	0.00435	0.98	2.96	5.66	2.85	5.4	7.83	2.85	0.36	0.23	1.07	0.24	1.38	0.5	0.86
	c105723f1p41781	-3.88	8.39e-06	0.00424	1.96	5.84	9.96	15.03	11.18	7.13	9.75	0.89	1.07	3.14	4.64	1.53	0.61	3.81
	c105725f1p24393	-5.12	4.15e-06	0.00461	0.58	5.06	5.12	3.21	4.76	3.12	5.69	0.33	0.35	0.68	0.4	1.55	0.42	1.63
	c105745f1p04561	-5.84	3.59e-06	0.00666	0.63	6.44	3.36	2.51	3.63	2.82	3.64	0.21	0.59	0.42	0.51	1.22	0.3	0.7
	c10574f1p01432	-8.59	4.07e-06	0.00169	0.45	3.13	1.91	5.22	4.56	4.03	4.64	0.06	0.47	0.21	0.16	1.09	0.23	0.57
	c105758f1p05026	-4.94	4.12e-06	0.00514	0.98	3.98	4.74	4.65	4.98	2.95	5.25	0.46	0.51	0.81	0.59	1.52	0.39	1.29
	c105769f1p25159	-4.23	4.17e-05	0.000223	10.53	57.99	52.8	34.23	48.18	37.02	52.9	4.18	3.41	6.49	10.99	25.05	6.28	13
	c105775f1p24863	-6.36	1.03e-05	6.59e-05	1.81	10.96	12.89	6.58	9.16	11.59	10.53	0.88	1.03	1.1	1.07	3.5	0.8	1.6
	c105784f1p04552	-5.64	1.11e-05	3.06e-05	2.36	10.98	9.78	9.01	13.98	12.35	11.16	1.06	0.55	1.69	1.66	3.29	0.98	3.11
	c10579f1p11638	-5.41	1.17e-05	5.85e-05	3.02	12.44	11.76	8.85	15.65	14.27	8.88	1.02	0.34	3.18	1.77	3.27	1.01	3.25
	c105802f1p05014	-5.21	4.2e-06	0.00383	0.62	3.37	7.32	3.19	3.85	3.85	4.76	0.52	0.16	0.7	0.56	1.62	0.54	1.07
	c105816f1p04466	-8.83	3e-06	0.00751	0.28	3.21	3.85	2.15	2.75	2.28	3.16	0.16	0.05	0.15	0.1	0.84	0.17	0.54
	c10581f1p1542	-5.71	1.79e-05	0.00012	4.4	20.44	27.38	15.95	13.24	19.57	12.8	1.7	1.24	4.32	2.74	4.87	2.22	2.84
	c105830f1p03125	-5.52	1.83e-05	0.000807	2.29	11.2	16.81	21.47	27.87	18.15	20.01	1.69	0.9	3.46	1.02	7.91	1.54	4.82
	c105835f1p06933	-5.41	4.21e-06	0.00369	0.7	4.24	5.68	4.89	3.12	3.49	5.3	0.36	0.23	0.46	0.44	2.18	0.32	1.09
	c10583f13p0614	-3.76	2.87e-05	0.0058	4.93	39.75	17.37	28.38	43.87	45.79	32.1	1.02	4.01	7.76	9.69	16	3.18	14.71
	c105877f1p25103	-4.35	5.59e-06	0.0016	1.01	4.55	7.48	6.06	7.47	5.08	7.59	1.36	0.44	1.64	0.71	2.7	0.6	1.56
	c105886f1p15165	-7.04	9.63e-06	0.01	2.37	14	2.89	4.02	14.33	15.58	4.97	0.21	0.37	2.18	1.89	0.97	0.82	1.82
	c10591f2p01055	-5.64	3.52e-06	0.00785	0.61	3.78	4.78	1.86	4.66	2.75	4.34	0.16	0.53	0.5	0.71	1.02	0.39	0.73
	c105920f1p04770	-5.03	6.85e-06	0.000283	1.44	5.68	7.01	6.63	10.17	7.58	5.91	0.79	0.17	1.43	1.02	2.67	0.84	1.92
	c105939f1p04118	-4.64	4.21e-06	0.00536	1.25	7.03	3.56	4.93	4.5	3.69	3.72	0.32	0.49	0.98	0.74	1.77	0.42	1.46
	c10593f1p1547	-4.74	2.38e-05	0.00335	4.03	15.21	39.58	17.44	25.12	36.34	23.38	2.22	1.43	3.88	6.94	10.13	2.36	7.05
	c105957f1p04729	-5.74	3.79e-06	0.0055	0.27	4.84	5.47	4.4	2.48	2.42	4.53	0.2	0.05	0.93	0.16	1.54	0.3	1.09
	c105962f1p54618	-5.19	4.91e-06	0.00187	1.13	8.07	5.25	3.6	5.41	3.71	5.27	0.58	0.49	0.67	0.73	2.19	0.59	1.01
	c105969f1p14534	-4	4.1e-06	0.00893	1.32	4.36	4.41	4.54	4.1	5.24	5.46	0.47	0.53	1.22	1.17	2.12	0.64	1.2
	c105972f1p44974	-3.89	4.8e-05	0.01	8.14	84.6	42.49	28.54	62.83	41.95	83.28	5.39	2.35	21.36	12.09	22.91	4.79	21.47
	c105981f1p04554	-6.94	4.47e-06	0.0025	0.36	3.99	6.74	2.35	5.89	3.6	3.89	0.28	0.44	0.54	0.34	0.7	0.34	1.22
	c105997f1p35010	-5.28	9.37e-06	4.22e-05	2.14	10.95	11.25	7.86	10.53	9.6	7.87	0.85	0.4	1.86	1.04	4.19	0.93	2.13
	c105999f1p04748	-5.51	6.61e-06	0.00179	1.67	6.92	5.42	4.28	11.13	8.31	4.37	0.55	0.5	1.31	1.71	1.78	0.61	1.18
	c106006f1p04404	-6.1	3.31e-06	0.00849	0.5	1.14	3.67	4.68	3.72	3.67	3.44	0.39	0.08	0.64	0.24	0.99	0.27	0.8
	c106011f1p14703	-6.93	1.05e-05	3.76e-05	1.73	7.68	10.86	8.32	12.67	11.47	10.75	1.22	0.5	0.77	1.06	2.82	0.84	1.96
	c106026f1p05075	-4.7	1.21e-05	0.000731	2.12	15.68	9.74	15.45	11.18	9.12	17.91	1.5	0.79	2.5	2.45	4.6	1.63	3.8
	c106034f1p1790	-4.6	2.91e-05	0.01	5.82	29.63	45.86	23.55	26.81	12.76	55.08	3.45	1.98	5.85	4.62	16.33	2.74	8.39
	c10604f1p0627	-6.43	1.35e-05	0.00348	5.72	10.51	17.26	11.76	19.51	18.27	0.22	1.34	0.71	2.9	0.24	4.75	1.79	1.23
	c10609f1p01456	-8.96	8.51e-06	0.00284	0.51	5.12	10.21	12.36	9.79	2.75	8.78	0.37	0.08	0.31	0.66	2.39	0.51	1.2
	c106103f1p04375	-7.9	2.9e-06	0.01	0.06	3.35	3.05	2.89	2.44	2.7	2.94	0.18	0.05	0.24	0.39	0.64	0.18	0.53
	c106107f1p04600	-6.02	7.64e-06	0.00097	1.85	4.73	8.6	5.19	10.1	11.51	5.48	0.44	0.61	0.59	1.05	2.2	0.92	2.08
	c106121f1p04342	-5.52	3.29e-06	0.01	0.67	2.81	3.72	4.57	3.97	1.99	3.59	0.26	0.38	0.78	0.31	1.25	0.2	0.69
	c106127f1p14964	-7.32	4.51e-06	0.00134	0.25	1.74	5.26	4.45	5.29	5.28	4.41	0.28	0.44	1.02	0.34	0.6	0.24	0.73
	c106128f1p14295	-5.07	1.05e-05	0.00081	2.48	8.44	8.9	9.04	10.39	11.37	18.15	1.11	0.29	3	1.61	4.35	1.58	1.64
	c106153f1p24480	-4.93	9.07e-05	0.000214	16.07	135.44	82.76	77.03	119.07	84.03	92.92	6.07	5.8	17.94	13.68	30.32	12.69	36.72
	c106163f1p14470	-5	9.08e-06	0.000463	1.19	9.16	8.33	11.13	10.06	6.83	12.83	0.89	1	2.65	1.73	2.75	0.69	2.21
	c10616f1p0634	-6.95	5.54e-06	0.00216	0.15	4.4	6.41	7.95	4.6	3.07	6.84	0.2	0.18	0.72	0.71	0.39	1.06	1.55
	c106208f1p05221	-5.97	9.38e-06	9.36e-05	1.68	9.97	11.85	5.87	10.11	10.38	8.53	0.77	0.71	0.79	1.69	3.32	0.72	1.78
	c10620f2p01090	-5.37	6.18e-06	0.01	1.77	11.45	0.66	5.34	6.94	5.57	7.91	0.19	0.1	0.69	0.96	2.81	1.26	1.37
	c106215f1p14350	3.97	-0.00196	2.83e-05	1531.64	221.23	33.05	261.57	7.02	353.33	265.51	1695.59	1696.32	1434.96	1526.79	1270.28	1696.85	1288.38
	c106225f1p04846	-6.91	4.48e-06	0.00152	0.53	3.88	5.75	4.17	3.77	5.14	4.25	0.32	0.02	0.9	0.11	1.34	0.28	1.02
	c106237f1p25211	-5.48	1.13e-05	3.76e-05	2.37	11.08	13.2	8.18	12.01	12.84	12.26	0.71	0.62	1.32	1.8	3.69	1.03	3.97
	c106243f1p05278	-5.17	5.54e-06	0.00183	1.08	8.03	8.3	5.17	5.13	3.42	4.71	0.93	0.68	1.07	0.54	1.22	0.77	1.73
	c106256f1p14139	-6.07	5.91e-06	0.000998	0.94	4.87	9.58	5.26	6.57	4.15	5.19	0.47	0.33	0.92	0.45	2	0.43	1.42
	c106296f3p5829	-4.27	8.76e-05	0.0021	15.3	96.42	149.91	105.69	69.81	113.23	66.74	12.43	7.03	23.2	10.87	48.29	9.33	33.23
	c10629f1p0532	-9.78	5.72e-06	0.000964	0.52	5.54	9.22	4.71	4.98	4.15	3.4	0.24	0.21	0.43	0.14	1.55	0.08	0.68
	c106306f1p52120	-5.43	5.32e-06	0.01	1	9.73	1.84	4.88	5.59	3.84	7.15	0.65	0.21	0.96	0.46	1.76	0.63	1.6
	c106308f1p04384	-5.33	7e-06	0.000254	2.16	8.04	8.39	4.07	7.84	9.37	4.78	0.48	0.79	1.03	0.77	2.45	0.87	1.99
	c106319f1p04908	-6.97	6.38e-06	0.00728	0.75	5.29	5.02	4.25	6.36	4.46	12.41	0.63	0.14	0.94	0.53	1.68	0.21	1.4
	c106332f1p04394	-7.19	3.82e-06	0.00339	0.48	3.32	6.24	1.9	3.21	4.57	3.6	0.29	0.3	0.22	0.47	1.1	0.33	0.53
	c106339f1p04694	-7.22	3.62e-06	0.00424	0.45	4.98	2.58	3.89	2.71	2.82	4.61	0.22	0.02	0.76	0.52	0.74	0.14	0.65
	c106341f1p41935	-5.29	4.88e-06	0.00179	1.28	7.14	4.6	5.85	4.73	4.62	3.72	0.5	0.4	0.82	0.77	1.53	0.6	1.43
	c106355f1p24514	-5.79	3.47e-06	0.00774	0.71	2.3	5.91	4.24	2.32	3.27	3.45	0.32	0.12	0.72	0.44	1.19	0.41	0.63
	c10635f2p0499	-6.57	4.3e-05	9.23e-05	5.88	42.31	52.54	32.75	59.26	38.37	35.31	1.51	2.24	5.6	5.36	10.42	2.49	12.95
	c106364f1p05426	-5.64	3.37e-06	0.00932	0.39	3.84	4.74	3.13	4.11	4.02	1.54	0.13	0.09	0.44	0.9	1.53	0.05	0.73
	c106366f1p05056	-3.99	4.05e-06	0.00951	1.09	5.5	3.2	4.92	3.5	4.4	6.58	0.95	0.33	0.63	0.89	2.57	0.67	1.28
	c106375f1p04771	-5.38	4.29e-06	0.0034	1.08	5.41	4.26	3.19	4.83	4.91	4.22	0.43	0.4	0.89	0.76	1.52	0.36	0.83
	c106381f1p24360	-6.29	4.5e-06	0.00186	0.46	4.3	4.44	4.33	4.92	4.94	4.85	0.52	0.28	0.75	0.36	1.46	0.5	0.63
	c106385f1p04653	-5.04	5.96e-06	0.000572	1.01	5.23	6.91	6.78	7.74	7.11	3.81	0.61	0.31	1.18	1.49	1.99	0.55	1.53
	c106393f1p04594	-5.4	4.42e-06	0.00278	1.49	4.09	3.63	3.56	6.42	5.2	4.19	0.25	0.32	0.39	0.89	1.7	0.59	1.16
	c106404f1p14574	-6.68	6.25e-06	0.00106	0.9	3.44	8.03	4.77	9	6.96	4.85	0.61	0.59	0.51	0.83	1.34	0.13	1.68
	c106409f1p11646	-6.35	4.76e-06	0.00235	1.28	6.29	7.42	5.44	3.13	3.09	2.44	0.05	0.2	0.82	0.27	1.65	0.55	1.03
	c10640f2p0904	-7.74	1.42e-05	0.000308	2.64	9.78	15.97	19.83	10.32	8.09	17.84	0.09	0.74	3.6	2.14	1.92	0.37	2.05
	c106418f1p02248	-4.66	8.38e-06	0.000123	1.59	7.63	10.2	9.3	10.09	7.43	9.58	1.42	0.65	1.62	1.79	3.02	1.15	2.35
	c106419f1p14407	-6.13	3.91e-06	0.00404	0.82	4.03	4.18	4.16	4.53	3.21	3.74	0.59	0.18	0.7	0.38	1.12	0.42	0.64
	c10641f1p0655	-5.05	3.28e-06	0.01	1.4	3.17	4.83	3.6	2.11	4.41	2.12	0.64	0.68	0.58	0.68	0.63	0.38	0.7
	c106447f1p02305	-5.29	4.97e-06	0.0016	1.39	5.86	3.69	5.69	5.57	4.49	5.66	0.36	0.39	0.89	0.81	1.94	0.58	1.16
	c106449f1p04370	-7.85	2.62e-06	0.01	0.14	1.89	3.6	2.11	2.64	2.46	2.91	0.19	0	0.37	0.08	0.74	0.24	0.39
	c106455f1p04394	-9.51	2.64e-06	0.01	0.31	2.49	4.28	0.97	1.61	2.27	3.45	0.19	0.03	0.22	0.19	0.64	0.11	0.23
	c106460f1p34030	-5.8	3.37e-06	0.00897	0.73	4.94	4.14	2.41	3.9	2.46	3.06	0.6	0.55	0.26	0.24	1.17	0.35	0.56
	c106514f1p03941	-5.32	2.85e-05	2.16e-05	5.04	29.5	30.09	27.7	34.57	25.9	32.92	2.42	2.7	5.7	4.8	8.48	3.28	7.51
	c106520f1p43906	-5.17	1.33e-05	9.06e-05	2.84	14.4	14.53	8.14	17.07	13.75	15.56	1.58	0.97	2.86	1.98	3.93	1.42	3.93
	c106527f1p01115	-4.44	3.9e-06	0.00959	1.64	3.88	2.84	4.84	5.98	4.94	2.74	0.67	0.6	0.34	0.4	3.11	0.33	0.6
	c10652f1p01118	-6.17	1.21e-05	0.000135	1.73	15.82	10.2	13.07	14.21	7.78	12.19	1.05	0.5	2.3	1.27	3.26	0.71	3.08
	c106533f1p14958	-5.68	4.77e-06	0.0017	0.61	4.65	4.51	3.06	5.46	5.89	6.46	0.31	0.36	1.24	0.33	0.99	0.76	1.4
	c106539f1p14890	-5.72	3.92e-06	0.00459	0.56	4.88	3.5	5.56	3.19	2.64	4.87	0.36	0.18	0.62	0.68	1.13	0.27	1.16
	c10655f3p21398	-6.77	1.63e-05	0.00408	1.45	13.14	28.89	17.12	12.71	7.7	19.68	1.89	0.4	0.43	1.65	5.56	0.86	4.08
	c106563f1p44491	-5.37	9.54e-06	0.000118	2.72	7.76	13.76	7.14	12.33	8.36	8.95	1.28	0.65	1.42	1.04	2.49	1.1	3.39
	c106570f1p04774	-6.2	3.73e-06	0.0049	0.49	3.37	3.7	6.44	2.79	3.68	3.01	0.33	0.32	0.33	0.23	1.08	0.66	0.84
	c10657f1p0810	-7.22	6.17e-06	0.000182	2.27	3.21	8.92	5.1	7.32	5.97	3.78	0.67	0	0.94	0.46	2.04	0	0.95
	c106586f1p04736	-11.48	2.5e-06	0.01	0.41	0.99	3.25	3.63	3.1	0.96	1.87	0.24	0	0.05	0.08	0.56	0.22	0.1
	c106595f1p14835	-4.55	5.58e-06	0.0028	1.21	4.68	5.18	9.12	7.93	3.9	5.45	0.88	0.48	1.19	0.78	2.37	0.54	1.98
	c10659f5p01362	-5.22	1.45e-05	0.000592	2.42	18.93	14.38	16.6	20.41	12.84	8.86	1.5	0.16	2.33	1.36	6.54	1.52	4.67
	c106601f1p04495	-5.23	3.69e-06	0.0073	0.96	4.67	4.98	3.6	3.23	3.26	3.53	0.48	0.25	0.57	0.3	1.51	0.38	1.14
	c106604f1p14711	-11.58	3.4e-06	0.00844	0.6	4.61	5.14	2.68	0.24	3.75	1.88	0.44	0	0.49	0.16	0.14	0.1	0.3
	c106610f1p14273	-4.9	7.68e-06	0.00291	1.24	4.9	5.15	10.78	12.21	8.15	8.34	0.67	0.71	1.93	1.7	1.66	1.24	2.45
	c10661f1p1999	-6.59	2.95e-05	0.00105	3.49	30.69	43.73	38.36	23.83	12.29	31.42	2.22	0.67	3.41	5.29	7.86	1.83	6.63
	c106637f1p04481	-4.94	3.32e-06	0.01	0.65	5.35	1.8	2.84	5.29	2.55	3.68	0.27	0.02	0.4	0.36	2.3	0.32	0.8
	c10663f1p11482	-6.55	1.14e-05	0.00298	2.29	16.61	6.91	8.9	19.57	7.36	8.63	0.57	1.13	1.89	0.95	2.79	0.76	2.64
	c106658f1p04852	-5.21	1.03e-05	0.000274	2.14	8.14	14.66	7.93	13.56	11.26	8.79	1.31	0.76	1.37	1.49	4.19	1.1	2.52
	c106685f1p04745	-5.27	9.48e-06	0.000108	1.41	9.17	8.4	9.01	10.05	10.45	12.51	1.41	0.59	1.23	1.66	3.05	1.13	2.5
	c106693f1p24611	-5.85	2e-05	7.63e-05	3.77	13.54	16.91	21.66	27.21	22.04	21.53	2.04	1.38	3.14	2.97	7.09	1.9	3.12
	c106704f1p04605	-5.05	9.24e-06	0.00347	2.01	10.48	9.79	7.94	17.51	7.36	5.75	1.18	0.66	1.16	1.23	3.78	1.35	2.69
	c106706f1p04645	-3.97	4.58e-06	0.0058	1.59	5.47	5.14	5.75	6.48	4.09	4.6	0.77	0.76	1.44	0.76	1.73	0.93	1.94
	c106748f1p04729	-6.07	4.97e-06	0.0011	0.9	4.12	3.49	6.06	4.97	7.28	4.37	0.63	0.19	0.73	0.7	1.78	0.31	0.81
	c106756f1p23577	-6.88	3.5e-06	0.00546	0.38	3.67	3.3	3.38	3.48	3.66	3.64	0.29	0.03	0.72	0.33	0.71	0.28	0.76
	c106758f1p04586	-4.71	7.65e-05	0.00123	20.49	52.56	99.11	91.08	121.88	77.25	54.8	5.71	5.42	14.19	11.8	50.47	4.66	17.46
	c106759f1p14599	-5.97	3e-06	0.01	0.14	3.3	5.09	2.52	3.52	2.27	2.41	0.42	0.15	0.3	0.29	1.06	0.12	0.9
	c106780f1p24343	-4.35	7e-06	0.000397	2.22	9.07	6.52	7.33	10.37	5.44	8.01	1.3	0.93	1.62	2.13	2.04	0.83	2.39
	c106782f1p24466	-5.31	1.15e-05	0.000613	1.97	14.74	16.67	6.89	12.5	8.59	13.38	1.32	1.33	1.29	1.88	4.28	1.3	2.68
	c106786f1p14948	-5.42	1.3e-05	0.00274	2.56	12.63	12.1	7.19	8.8	20.45	19.52	1.35	0.84	2.5	2.51	3.28	1.58	3.3
	c10679f1p0935	-4.54	4.07e-06	0.00646	1.28	4.27	6.02	3.62	1.48	5.17	5.95	0.45	0.24	0.89	0.16	2.12	0.93	1.32
	c1067f2p01290	-6.05	3.25e-06	0.00845	2.28	0.27	3.91	2.57	3.91	2.14	4.95	0.32	0.26	0.06	0.35	1.22	0.23	0.88
	c10680f1p0608	-7.15	9.09e-06	0.000113	1.97	6.84	8.07	6.57	13.69	8.63	8.69	0.48	0.55	1.12	2.08	1.9	0.55	0.93
	c106815f1p14744	-6.27	3.46e-06	0.00669	0.64	3.4	3.22	3.75	4.54	3.11	3.05	0.21	0.21	0.45	0.38	0.99	0.33	0.89
	c10681f1p01922	-6.34	3.66e-06	0.00571	0.28	1.61	3.8	5.03	4.04	5.27	2.3	0.22	0.52	0.74	0.46	0.81	0.21	0.56
	c106821f1p05390	-5.53	3.41e-06	0.00906	0.72	4.55	2.47	4.46	4.46	3.23	2.22	0.33	0.13	0.76	0.38	1.07	0.58	0.74
	c106822f1p04769	-4.29	5.34e-06	0.00209	1.99	6.84	8.42	4.36	6.7	5.53	3.59	0.76	0.24	0.99	0.78	2.67	1.37	1.91
	c10682f1p0855	-6.92	4.38e-06	0.00922	0.32	3.06	7.97	4.37	1.78	3.89	5.06	0.34	0.39	0.53	0.52	1.07	0.29	0.66
	c106833f1p04416	-4.77	1.65e-05	0.000154	3.56	13.33	24.36	13.07	20.05	18.39	17.7	2.7	2.03	2.64	2.49	6.49	2.76	4.05
	c106843f1p14286	-6.7	3.22e-06	0.00806	0.8	4.44	2.05	3.53	3.43	2.65	2.92	0.09	0.18	0.55	0.6	0.83	0.22	0.49
	c10685f1p0844	-4.03	7.23e-06	0.00859	1.2	4.11	11.12	10.82	6.27	6.38	11.53	1.44	0.8	2.51	1.94	4.21	0.39	1.46
	c106860f4p4790	-5.34	4.37e-06	0.01	0.35	7.24	3.84	7.28	2.71	2.45	4.22	0.37	0.43	0.38	0.47	1.15	0.63	1.82
	c106873f1p04711	-6.25	3.24e-06	0.00906	0.43	2.8	3.86	5.57	3.45	2.67	1.06	0.04	0.48	0.56	0.35	0.58	0.24	0.93
	c106877f1p04502	-5.95	6.23e-06	0.000284	1.21	6.3	7.18	7.38	6.24	4.85	6.35	0.47	0.29	0.8	0.25	2.77	0.59	1.47
	c106878f1p04781	-5.36	2.04e-05	0.00883	3.1	12.54	42.87	18.13	22.02	16.78	18.38	2.26	0.33	4.21	2.2	8.63	1.31	6.03
	c106882f1p04460	-6.69	9.53e-05	2.6e-05	14.77	107.37	109.33	75.84	83.89	109.6	86.43	5.87	1.83	8.39	12.33	23.31	9.05	27.03
	c106890f1p44904	-4.36	7.53e-06	0.00161	0.97	6.54	7.2	7.63	12.3	9.13	7.78	0.54	0.55	1.87	1.31	3.76	1.14	2.66
	c106893f1p04279	-5.08	4.94e-06	0.00386	0.97	2.81	7.93	3.88	7.13	5.18	4.21	0.58	0.34	1.01	0.89	1.65	0.57	1.28
	c10689f1p01007	-5.29	7.77e-06	0.00164	0.64	5.85	11.47	10.41	9.27	6.31	6.35	0.79	0.22	1.43	0.96	2.71	1.61	1.79
	c106901f1p04513	-4.87	7.43e-06	0.00039	1.43	10.41	9.79	7.2	6.99	5.54	7.49	1.18	0.27	1.14	1.53	3.08	0.64	2.18
	c106905f1p11470	-6.7	6.6e-06	0.000136	1.63	5.19	8.54	4.97	6.69	6.1	7.47	0.48	0.38	0.62	0.96	1.97	0.31	1.33
	c106931f1p44949	-7.41	6.41e-06	0.000129	1.97	8.79	8.19	5	4.61	4.63	5.5	0.41	0.5	0.41	0.65	1.62	0.62	1.02
	c106932f1p35975	-5.93	5.82e-06	0.000462	0.9	6.47	4.77	7.95	6.6	6.07	4.23	1	0.26	0.36	0.9	1.69	0.39	1.63
	c106933f1p04983	-5.92	2.97e-06	0.01	0.5	2.71	2.52	3.64	3.99	3.11	2.4	0.21	0.11	0.52	0.68	0.79	0.24	0.63
	c106935f1p34239	-5.35	1.67e-05	0.000446	3.64	24.54	9.91	19.5	21.62	12.86	16.2	1.1	1.4	1.61	2.7	7.2	2.55	3.67
	c106943f1p34946	-10.51	2.48e-06	0.01	0.93	1.37	1.11	1.16	4.61	2.62	2.19	0.07	0.09	0.18	0.26	0.25	0.07	0.42
	c106959f1p04919	-5.6	6.34e-06	0.0006	1.29	9.21	5.41	4.48	8.5	5.09	5.97	0.58	0.36	0.51	1.09	1.77	0.66	2.16
	c10695f1p0840	-5.74	3.38e-06	0.00877	0.55	3.1	4.13	4.76	2.71	3.79	2.65	0.25	0.4	0.63	0.53	1.09	0.45	0.43
	c106962f1p16523	-5.07	7.53e-06	0.000485	1.52	10.31	5.32	10.39	8.15	6.75	6.46	1.06	0.33	1.38	1.15	1.96	0.84	2.92
	c106966f1p14384	-5.61	4.22e-06	0.00335	1.01	3.2	5.04	4.66	5.47	4.16	3.65	0.55	0.18	0.85	0.19	1.51	0.74	0.83
	c106983f1p05042	-4.55	3.95e-06	0.00781	0.82	3.37	7.08	3.64	4.43	2.71	5.22	0.72	0.2	0.9	0.64	2.04	0.47	1.03
	c106986f1p04329	-7.35	4.53e-06	0.00985	0.83	3.86	5.95	1.52	8.08	4.68	2.21	0.42	0.44	0.27	0.64	1	0.46	0.45
	c10698f19p31343	-5.76	6.22e-06	0.000992	1.78	4.26	6.77	5.64	8.73	8.74	3	0.41	0.58	1.02	0.94	2.4	0.34	1.07
	c106998f1p04672	-8.08	3.66e-06	0.01	0.49	2.83	4.49	1.91	6.84	1.81	3.13	0.37	0.14	0.13	0.32	0.69	0.53	0.47
	c107015f1p04588	-5.24	1.09e-05	0.000634	1.85	12.8	7.78	15.08	14.6	7.11	11.34	1.27	0.78	2.25	2.11	2.52	1.23	3.3
	c107021f1p05300	-5.58	4.23e-06	0.0034	0.9	4.17	7.31	3.22	4.03	3.22	4.5	0.23	0.19	0.9	0.32	1.5	0.4	1.37
	c107022f1p04513	-6.11	4.33e-06	0.00239	0.98	5.17	3.6	3.7	4.83	3.35	5.66	0.58	0.3	0.78	0.27	1.38	0.43	0.74
	c10702f1p02358	-5.23	3.93e-06	0.00553	0.89	4.48	5.38	3.58	3.52	3.33	4.65	0.23	0.24	0.58	0.5	1.61	0.47	1.31
	c107033f1p14996	-5.01	4.89e-06	0.00512	0.61	6.15	2.62	3.37	7.76	5.85	5.52	0.46	0.36	1.12	0.59	1.43	0.75	1.65
	c107049f1p04726	-6	3.82e-06	0.00633	1.05	3.66	6.77	1.97	3.86	1.75	4.55	0.15	0.12	0.7	0.69	0.66	0.28	1.33
	c10704f5p11700	-8.21	3.09e-06	0.01	0.59	4.9	3.74	1.47	0.96	1.71	4.58	0.05	0.13	0.04	0.31	1.17	0.24	0.24
	c107065f1p23821	-3.91	1.29e-05	0.000807	2.5	17.62	16.93	11.33	18.87	13.38	13.07	2.14	1.26	2.41	3.01	7.39	1.63	6.11
	c10707f1p02079	-8.25	3.4e-06	0.00944	0.14	1.89	4.57	3.85	3.25	0.96	5.16	0.29	0.06	0.34	0.26	0.45	0.35	0.66
	c10708f4p41784	-5.31	9.66e-06	0.00569	1.29	17.57	9.62	6.89	13.34	7.11	7.24	1.15	0.06	1.44	0.54	2.92	1.07	4.69
	c107114f1p21993	-7.22	7.82e-06	0.00313	1.2	7.05	5.5	8.52	11.45	10.94	2.37	0.74	0.34	0.99	0.64	1.16	1.31	1.34
	c10711f1p01710	-6.07	8.45e-06	0.000408	1.02	9.21	8.51	5.88	9.93	11.68	6.25	0.42	0.2	1.72	1.17	2.51	0.7	1.92
	c107122f1p02443	-4.57	2.38e-05	5.39e-05	4.21	28.37	25.03	24.99	31.87	25.18	23.25	3.84	2.75	4.77	3.53	8.8	3.66	8.28
	c107123f1p15012	-7.2	4.93e-06	0.00253	0.93	2.83	7.02	5.21	6.71	4.93	1.8	0.49	0.4	0.38	0.37	1.52	0.12	0.81
	c107134f1p04629	-7.13	5.8e-06	0.01	0.8	3.19	10.95	4.46	5.41	2.45	7.79	0.24	0.33	1.28	0.55	1.94	0.34	0.23
	c107142f1p04522	-4.99	6.6e-06	0.000349	1.47	7.72	7.78	5.92	8.88	7.1	5.2	0.8	0.42	1.2	1.19	2.84	1.06	1.32
	c107154f1p05000	-5.96	3.77e-06	0.00512	0.74	4.04	4.46	4.26	4.02	3.35	3.1	0.46	0.25	0.65	0.52	0.91	0.4	0.83
	c10718f2p01515	-14.55	6.4e-06	0.00312	1.27	5.72	9.33	3.61	9.56	3.92	1.65	0.08	0.07	0.45	0.15	0.71	0.44	0.51
	c10719f1p21973	-7.35	0.000127	0.000333	30.73	134.56	132.12	97.44	202.47	99.72	67.89	3.1	1.76	16.57	1.85	41.86	1.62	37.31
	c107204f1p04628	-3.7	6.91e-06	0.00118	1.29	8.54	8.73	7.67	8.03	9.48	8.35	0.83	0.56	1.82	2.22	5.02	0.94	2.71
	c107207f1p34113	-5.53	7.43e-06	0.000284	1.34	6.1	7.46	5.71	10.01	6.63	9.82	0.96	0.84	1.91	0.76	1.81	0.65	1.58
	c107210f1p03325	-5.57	8.05e-06	0.00171	2.11	8.01	13.79	3.89	10.07	6.25	7.17	0.79	0.63	0.6	0.89	2.37	0.95	2.97
	c107215f1p05166	-5.24	1.41e-05	9.17e-05	2.59	10.64	13.34	18.01	16.73	13.33	17.26	1.24	0.82	2.39	2.84	5.01	1.15	4.07
	c10722f6p0657	-5.08	0.000131	0.0002	21.69	147.52	110.72	151.58	151.8	184.68	96.28	11.73	7.5	25.36	25.95	44.57	16.01	39.04
	c107231f1p24489	-5.5	4.16e-06	0.00381	0.61	3.59	6.14	4.35	3.31	4.24	4.71	0.35	0.27	0.93	0.5	1.31	0.32	1.21
	c107247f1p04058	-6.68	3.51e-06	0.00582	0.46	4	2.58	4.61	4.94	1.71	3.48	0.07	0.42	0.17	0.5	0.51	0.6	0.99
	c107255f1p14458	-6.08	5.34e-06	0.000882	1.2	5.91	7.96	3.49	6.31	3.06	4.99	0.38	0.3	1.24	0.65	1.17	0.42	1.26
	c107256f1p14332	-4.79	2e-05	0.00124	4.3	23.28	17.94	13.05	34.69	23.49	17.88	1.6	1.2	3.82	3.62	8.36	2.55	6.96
	c10726f2p2889	-8.36	5.5e-06	0.01	0.31	7.01	10.38	2.13	3.54	3.41	5.62	0.33	0.13	1.02	0.92	0.46	0.09	0.92
	c107281f1p3792	-3.94	5.86e-06	0.00496	0.93	9.02	7.33	3.95	8.8	6.83	4.94	1.06	0.43	0.86	1.61	3.67	0.9	2.09
	c107282f1p04775	-9.76	3.2e-06	0.00498	0.26	2.2	4.68	4.01	2.41	1.78	3.31	0.16	0.1	0.33	0.22	0.37	0.13	0.6
	c107291f1p04993	-6.16	8.35e-06	5.3e-05	1.39	8.58	10.39	6.27	8.67	7.68	8.34	0.71	0.65	0.99	0.87	2.45	0.73	1.94
	c107318f1p14321	-5.83	5.66e-06	0.000583	0.97	5.87	6.48	5.06	7.19	3.89	6.75	0.59	0.23	0.75	0.65	2.1	0.57	1.32
	c107328f1p04172	-5.68	1.46e-05	0.000161	3.72	10.28	10.83	15.05	16.45	21.42	14.34	1.36	1	2.18	1.23	6.15	0.81	3.5
	c10732f1p0986	-5.11	8.46e-06	0.000673	1.21	8.79	13.32	8.1	8.82	6.02	8.88	1.15	0.34	1.15	0.98	3.69	1.14	2.35
	c10733f6p11068	-8.26	5.94e-06	0.00311	0.6	3.42	9.88	6.35	7.1	3.63	3.91	0.16	0.32	1.07	0.91	0.16	0.9	0.72
	c107355f1p04511	-6.4	3.1e-06	0.00957	0.35	2.07	5.87	2.67	2.06	2.68	3.16	0.09	0.17	0.08	0.3	1.42	0.37	0.51
	c107356f1p04366	-6.17	7.7e-06	0.00154	0.78	4.45	6.75	8.98	11.68	5.79	9.4	1.05	0.33	1.04	0.87	2.2	0.56	1.7
	c10735f1p01003	-6.6	6.34e-06	0.000196	0.64	6.06	6.91	5.67	7.55	5.79	6.8	0.46	0.11	0.98	0.97	1.24	0.83	1.38
	c10738f2p01522	-11.65	5.19e-06	0.01	0.3	6.49	7.01	8.26	3.56	3.35	0.18	0.33	0.07	0.7	0.24	0.54	0.11	0.51
	c107397f1p04805	-5.6	4.9e-06	0.00155	0.88	4.85	4.46	4.73	7.97	4.49	4.29	0.46	0.28	0.96	0.73	1.5	0.7	1.02
	c107407f1p04642	-4.64	4.58e-06	0.00365	1.15	4.86	4.79	5.12	6.27	4.16	4.94	0.51	0.6	0.69	0.75	1.87	0.74	1.58
	c107408f1p04701	-10.34	4.47e-06	0.00103	0.28	3.21	5.91	5.82	4.15	2.1	3.6	0.29	0.12	0.31	0.21	0.52	0.23	0.74
	c107423f1p04868	-6.58	5.11e-06	0.000798	0.83	4.38	5.92	4.04	7.92	4.22	4.51	0.48	0.23	0.89	0.67	1.63	0.26	0.68
	c107430f1p05053	-8.09	1.86e-05	0.01	1.75	8.76	35.88	23.27	7.82	18.27	14.73	1.44	0.93	2.69	1.33	4.15	0.63	2.49
	c107433f1p45057	-6.99	1.97e-05	0.000246	2.23	17.89	27.1	14.73	25.44	12.88	20	1.47	0.46	2.65	1.93	5.95	1.08	3.66
	c107434f1p04417	-6.37	7.21e-06	0.0006	1.43	4.86	5.61	7.1	6.96	6.52	11.66	0.77	0.35	1.25	0.61	2.21	0.86	0.88
	c107444f1p04405	-5.25	3.82e-06	0.0059	1.44	2.41	2.79	2.6	5.34	5.88	4.24	0.48	0.05	0.52	0.86	1.56	0.31	0.92
	c107451f1p14632	-6.57	5.42e-06	0.000563	0.55	4.67	6.77	5.88	5.78	3.95	6.17	0.63	0.29	0.72	0.45	1.73	0.37	0.96
	c107460f1p04958	-5.05	4.61e-06	0.00288	0.81	6.16	4.94	3.32	5.94	5.73	3.87	0.76	0.98	1.02	0.62	1.36	0.4	0.95
	c107465f1p04665	-5.9	4.88e-06	0.00396	0.61	4.61	5.42	3.55	4.92	2.93	8.47	0.41	0.19	1.43	0.64	1.26	0.62	0.62
	c10746f1p0950	-8.91	5.8e-06	0.00861	0.19	1.83	3.34	4.63	8.76	8.57	6.29	0.49	0.35	1.2	0.39	0.26	0.22	0.87
	c107470f1p05250	-6.66	4.37e-06	0.00636	1.44	4.93	1.15	7.06	4.89	5.19	1.74	0.54	0.16	0.65	0.1	0.69	0.41	1.41
	c107473f1p04267	-6.31	3.43e-06	0.0067	0.71	1.94	2.45	4.69	4.46	3.05	4.08	0.21	0.08	0.65	0.29	0.89	0.23	1.03
	c107489f1p04764	-7.12	9.1e-06	0.000247	2.02	8.74	6.7	7.06	14.3	9.5	6.31	0.95	0.35	0.87	1.03	1.89	0.88	1.71
	c107511f1p14186	-5.06	3.7e-06	0.00782	0.53	3.18	3.77	4.84	5.09	5.13	2.04	0.33	0.31	0.52	0.63	1.56	0.51	1.01
	c107532f1p14082	-4.93	1.62e-05	0.000226	4.65	23.39	19.4	11.82	11.83	15.89	20.22	1.19	0.33	2.72	2.42	7.91	2.1	5.09
	c107538f1p05147	-4.91	5.39e-06	0.00123	1.63	5.05	7.74	6.17	4.12	5.15	6.05	0.62	0.26	1.16	0.55	2.56	0.22	1.95
	c107540f1p14391	-6.09	7.87e-06	0.00027	1.24	8.06	9.53	8.92	8.3	3.87	8.9	0.7	0.74	1.03	0.86	2.45	0.9	1.33
	c107567f1p14562	-4.75	9.94e-06	0.00135	1.85	7.18	7.74	12.83	15.33	8.25	13.15	0.53	0.83	3.33	1.92	2.74	0.98	3.61
	c10757f1p21021	-4.16	5.06e-06	0.003	1.62	5.09	4.67	4.9	6.05	5.14	8.31	1.19	0.55	1.04	0.8	3.16	0.2	1.66
	c107585f1p04802	-5.94	7.71e-06	0.00277	1.69	12.84	4.57	3.62	9.88	7.51	8.19	0.47	0.67	1.08	1.39	3.08	0.83	0.62
	c107596f1p04736	-5.84	8.74e-06	0.000879	1.25	7.42	13.6	7.12	11.19	5.74	8.83	0.79	0.7	1.27	0.87	2.54	1.19	2.09
	c107599f1p04681	-5.96	7.76e-06	6.58e-05	1.57	6.59	9.19	5.71	9.7	7.4	7.84	0.66	0.48	1.02	0.86	2.81	0.83	1.39
	c107606f1p04418	-5.03	4.27e-06	0.00426	0.41	4.63	4.16	5.08	6.21	4.39	3.65	0.35	0.36	0.7	0.64	2	0.69	0.93
	c10760f4p01697	-5.53	5.65e-06	0.01	0.92	2.45	9.51	6.49	4.67	3.17	9	0.22	0.07	0.58	0.61	3.16	0.39	1.51
	c10762f1p01380	-7.23	1.7e-05	3.28e-05	2.6	21.74	15.27	12.35	17.91	17.4	14.91	1	0.81	1.26	1.13	3.6	1.45	4.88
	c107659f1p04922	-10.63	2.89e-06	0.00715	0.04	1.94	2.62	3.92	3	3.53	1.53	0.03	0.07	0.47	0.16	0.03	0.38	0.41
	c107685f1p04690	-5.81	6.82e-06	0.000686	0.98	5.24	9.48	5.6	9.57	6.28	5.63	0.89	0.35	1.01	0.71	2.26	0.97	1.17
	c107689f1p04838	-4.28	4.12e-06	0.00742	1.3	4.35	4.43	2.81	8	3.89	4.18	0.36	0.33	1.08	0.56	1.82	0.99	1.63
	c10769f3p51613	-6.68	4.68e-05	1.71e-05	9.18	42.89	58.16	37.88	49.24	39.45	51.19	3.22	2.85	5.31	3.46	16.36	3.53	8.38
	c107710f1p04811	-4.97	3.48e-06	0.01	0.72	4.13	3.14	4.22	4.21	2.55	4.32	0.5	0.14	1.05	0.49	1.32	0.37	0.81
	c107730f1p04469	-5.71	6.35e-06	0.000286	1.31	6.26	6.21	5.46	8.82	6.7	6.01	0.53	0.75	0.93	0.95	1.86	0.82	1.31
	c107737f1p15005	-5.46	7.46e-06	0.000452	1.76	8.61	11.57	4.99	7.01	7.84	5.68	0.82	0.22	1.4	0.49	3.27	0.93	1.57
	c107740f1p04339	-6.41	1.07e-05	9.36e-05	2.01	11.73	13.48	8.64	13.43	6.92	9.31	1.02	0.54	1.34	1.32	3.65	0.87	1.48
	c107743f1p04097	-5.3	2.07e-05	0.000127	4.38	15.24	17.76	20.26	31.37	23.9	21.49	1.96	1.89	3.03	3.51	7.09	2.66	5.22
	c107744f1p14657	-7.57	3.39e-06	0.00541	0.35	3.2	2.91	2.77	4.57	3.97	2.74	0.13	0.38	0.37	0.45	0.39	0.43	0.56
	c107773f1p04622	-11.69	2.99e-06	0.00558	0.14	1.04	3.83	3.68	3.8	3.02	1.49	0.2	0	0.47	0.13	0.44	0.08	0.13
	c107786f1p14440	-5.05	3.53e-05	2.32e-05	7.8	34.99	39.32	37.53	40.99	36.12	36.03	4.21	2.54	3.73	3.9	17.04	4.52	10.16
	c107787f1p02634	-5.48	1.68e-05	0.01	3.18	16.98	31.07	26.84	8.23	13.68	8.81	0.99	0.77	0.4	1.78	7.29	0.66	7.96
	c107792f1p05030	-5.89	3.64e-06	0.00613	0.5	3.2	4.01	2.81	5.11	2.88	4.76	0.54	0.18	0.35	0.2	1.84	0.36	0.47
	c107807f1p14846	-5.42	3.61e-06	0.00743	0.85	3.22	5.33	3.48	2.81	3.42	4.33	0.31	0.3	0.64	0.34	1.54	0.4	0.8
	c107829f1p04664	-5.46	7.25e-06	0.000375	1.5	9.41	9.51	4.05	8.2	6.72	6.68	0.61	0.1	1.48	1.58	2.25	0.29	2.13
	c10782f8p51331	-9.87	2.48e-05	0.000362	1.38	26.16	10.73	27.63	30.76	18.86	27.14	0.97	1.26	3.01	2.35	5.77	0.66	0.42
	c10783f2p3927	-4.59	8.32e-06	0.00283	1.68	7.45	9.46	8.36	10.29	6.08	12.69	1.57	0.84	1.06	0.08	6.66	0.71	1.27
	c107840f1p04721	-5.46	3.09e-06	0.01	0.76	2.49	5.15	2.86	3.57	2.3	2.97	0.44	0.17	0.62	0.41	0.93	0.39	0.73
	c107864f1p04707	-6.04	1.46e-05	0.000627	2.43	17.62	22.81	7.95	12.2	12.51	16.48	1.56	1.25	1.57	2.61	4.95	0.92	2.37
	c107865f1p04981	-6.37	3.29e-06	0.00803	0.53	2.56	3.93	1.29	3.38	5.4	3.42	0.35	0.14	0.85	0.18	0.73	0.27	0.69
	c107868f1p03231	-7.54	2.62e-06	0.01	0.31	1.93	4.16	1.24	4.37	1.75	1.68	0.38	0.14	0.19	0.18	0.64	0.15	0.37
	c107888f2p14744	-7.79	9.16e-06	0.00165	0.85	9.61	4.08	5.65	13.79	9.8	10.49	0.64	0.21	0.94	0.53	2.11	0.56	1.96
	c10788f4p0786	-7.1	1.06e-05	0.000866	2.81	13.68	16.89	4.22	10.11	8.78	7.61	0.91	0.29	1.73	0.85	2.42	0.74	2.09
	c107894f1p04617	-4.32	3.96e-06	0.00849	1.05	2.63	3.78	4.75	7.26	3.99	4.25	0.55	0.26	1.6	0.79	1.33	0.42	1.47
	c107896f1p14693	-7.23	6.43e-06	0.000501	0.88	5.34	9.66	5.37	7.2	5.95	3.96	0.47	0.17	1.05	0.71	1.48	0.59	0.84
	c107898f1p04797	-6.52	8.97e-06	0.00405	1.26	16.51	8.66	4.51	8.38	6.24	9.76	0.53	0.37	0.85	0.84	3.36	1	1.53
	c107899f1p04623	-6.05	8.39e-06	3.81e-05	1.96	9.74	7.4	7.72	9.74	8.47	7.9	0.82	0.77	1.08	0.93	2.81	0.83	1.5
	c107900f1p04738	-4.73	7.8e-06	0.000465	1.51	9.59	9.82	5.23	8.34	6.93	10.42	0.77	0.44	2.58	1.3	2.46	0.88	2.55
	c107927f1p12293	-7	3.12e-06	0.00878	0.32	1.87	2.87	4.74	3.98	1.61	3.79	0.16	0	0.29	0.64	0.39	0.47	0.78
	c107935f1p34378	-4.68	7.09e-06	0.000958	0.82	4.98	7.41	9.31	8.63	6.86	9.29	0.47	0.79	1.61	0.85	2.7	1.32	2.38
	c107936f1p05202	-4.87	3.89e-06	0.0069	0.61	3.3	3.62	3.27	6.2	4.99	4.19	0.45	0.35	0.5	1.04	1.54	0.49	1
	c107937f1p05011	-6.24	6.33e-06	0.00022	1.14	5.57	6.91	5.37	6.56	6.14	7.99	0.52	0.36	1.15	0.53	1.96	0.5	1.34
	c107986f1p04614	-6.03	5.16e-06	0.000922	0.74	4.21	5.03	6.2	6.5	4.69	5.33	0.57	0.19	0.69	0.68	1.72	0.46	1.11
	c107990f1p14555	-5.35	3.54e-06	0.00858	0.48	5.21	3.8	4.88	4.17	2.42	2.35	0.56	0.2	0.43	0.69	0.8	0.46	1.23
	c107993f1p24448	-6.61	3.72e-06	0.00444	0.52	2.76	5.48	2.83	4.36	3.44	3.71	0.2	0.15	0.24	0.42	1.43	0.31	0.75
	c10799f2p01050	-6.15	7.87e-06	0.00297	1.05	9.24	12.63	5.09	4.08	6.7	10.32	0.48	0.53	1.3	1.77	1.89	0.79	1.22
	c108006f1p05249	-6.56	8.96e-05	0.000432	11.16	72.62	119.64	75.64	114.29	112.43	50.85	4.36	2.36	18.19	12.42	26.73	4.2	16.62
	c10800f3p0745	-5.88	8.01e-06	0.000199	1.11	7.21	7.56	9.44	10.15	9.08	5.41	0.62	0.3	0.71	1.2	3.33	0.89	1.45
	c108047f1p24548	-7.23	3.09e-06	0.00882	0.59	3.39	4.54	1.56	4.16	1.4	3.27	0.36	0.15	0.38	0.05	1.18	0.16	0.34
	c108057f1p14807	-3.96	7.39e-06	0.00246	0.75	8.13	11.45	8.64	9	5.6	9.25	1.34	0.68	2.14	1.81	3.44	1.37	2.55
	c108069f1p04458	3.76	-0.00115	6.97e-05	1001.47	133.24	45.08	138.3	13.5	197.05	154.83	1001.32	946.11	921.13	959.99	890.52	919.5	695.03
	c108090f1p85076	-6.83	3.82e-06	0.00453	0.79	4.05	6.03	2.43	5.37	2	2.34	0.67	0.37	0.45	0.55	0.76	0.15	0.4
	c108103f1p04999	-5.14	8.82e-06	0.00669	1.81	7.53	7.05	6.09	17.06	11.85	6.26	1.41	0.23	2.44	0.78	3.59	1.3	1.47
	c108106f1p04671	-5.53	7.04e-06	0.000331	1.26	6.8	10.41	5.28	6.99	7.95	5.86	0.77	0.59	0.77	1.08	2.72	0.6	1.53
	c108110f1p04526	-5.42	4.4e-06	0.00294	0.99	4.09	6.18	4.58	4.12	5.02	3.59	0.31	0.52	0.5	0.62	1.51	0.45	1.35
	c108118f1p04588	-7.6	4.56e-06	0.00113	0.78	3.39	4.77	3.91	6.36	4.59	3.63	0.32	0.19	0.56	0.36	1.02	0.26	0.89
	c108143f1p24628	-8.56	7.2e-06	0.000283	0.67	6.03	7.44	5.25	10.56	6.41	5.38	0.26	0.14	0.6	0.45	1.9	0.44	1.08
	c108163f1p04513	-5.5	2.66e-05	0.000165	4.57	28.1	30.09	31.65	16.89	26.82	32.61	2.64	1.39	2.39	2.78	13.07	2.93	5.82
	c108184f1p14451	-6.22	1.31e-05	9.18e-05	2.72	7.23	12.16	13.84	14.55	17.11	13.68	0.93	0.65	2.41	1.18	4.1	0.53	3.26
	c10818f2p11349	-5.95	1.03e-05	6.59e-05	1.97	8.99	13.15	7.52	11.21	9.2	12.36	1.05	0.75	1.12	1.54	3.31	0.65	2.4
	c108192f1p04459	-5.39	1.31e-05	0.000944	1.61	21.74	15.78	10.87	9.89	12.21	13.01	1.91	1.1	1.63	2.17	4.74	0.96	3.29
	c108195f1p04755	-5.28	5.42e-06	0.000939	1.52	4.5	4.7	6.16	4.03	5.83	8.39	0.43	0.23	0.3	0.58	2.37	0.8	1.95
	c10819f1p01103	-4.11	8.42e-06	0.00271	1.41	7.22	12.41	8.02	13.92	7.5	9.18	1.44	0.81	1.51	0.61	4.12	1.62	4.42
	c108208f1p34924	-5.88	8.26e-06	0.00368	0.75	4.72	8.79	12.86	11.57	8.49	4.91	0.49	0.66	1.14	0.97	3.11	1.07	1.42
	c10824f1p0909	-6.34	4.34e-06	0.00591	0.5	6.84	3.96	2.52	5.81	1.97	5.03	0.37	0	0.58	0.9	1.27	0.41	0.68
	c108250f1p11057	-10.63	8.93e-06	0.00461	0.26	3.6	14.83	4.27	10.1	8.98	8.91	0.79	0.84	0.93	0.07	0.16	0.74	1.26
	c108256f1p14552	-4.95	1.5e-05	0.00134	3.64	27.33	12.68	15.79	14.82	10.67	14.54	0.98	2.02	1.75	2.29	7.48	2.39	3.19
	c108267f1p04933	-5.68	2.98e-06	0.01	0.47	2.07	4.15	3.04	3.88	3.1	2.5	0.43	0.29	0.25	0.36	0.92	0.38	0.75
	c108271f1p04665	-5.31	1.38e-05	7.09e-05	2.24	14.93	12.49	12.2	18.26	12.83	16.23	1.58	0.82	2.97	1.56	4.62	1.64	3.61
	c108276f1p02616	-4.03	5.21e-06	0.003	1.44	7.2	4.95	5.82	7.83	5.73	4.61	1.09	0.9	0.84	0.77	2.8	0.89	2.06
	c1082f22p2774	-5.71	1.57e-05	0.00223	5.11	14.34	27.97	21.59	7.49	10.34	13.29	1.03	1.16	6.26	1.54	2.89	1.4	3.25
	c108309f2p13939	-5.5	6.1e-05	2.29e-05	11.79	55.95	58.76	53.88	76.86	64.94	71.54	5.86	5.31	11.83	8.12	20.78	6.59	13.07
	c108311f1p24574	-5.45	1.81e-05	7.28e-05	3.81	16.47	17.49	12.78	23.35	23.82	18.58	2.29	1.66	4.25	3.89	3.81	2.54	2.88
	c10831f1p01713	-5.66	5.85e-06	0.000486	1.01	5.72	6.27	5.17	8.91	5.04	4.59	0.46	0.32	1.4	1.08	1.2	0.89	1.13
	c108321f1p04419	-8.75	3.78e-06	0.00512	0.95	1.84	4.86	1.5	5.75	4.86	2.01	0.12	0.23	0.44	0.49	0.58	0.35	0.28
	c10832f6p31196	-6.27	8.91e-06	3.91e-05	1.92	6.38	9.17	8.82	10.44	8.19	9.65	0.35	0.37	0.63	0.75	4.22	0.83	1.55
	c108333f1p44707	-6.92	5.2e-06	0.000626	0.88	4.15	4.22	5.92	7.37	3.59	5.8	0.26	0.24	0.71	0.88	1.28	0.56	0.69
	c108342f1p04644	-4.83	9.53e-06	4.91e-05	2.94	9.99	9.71	10.83	11.06	9.37	10.22	0.78	0.31	1.29	1.95	4.44	0.88	3.61
	c108353f1p05106	-4.98	7.84e-06	0.000777	1.29	10.67	8.97	7.45	5.22	6.77	10.94	0.86	0.5	1.79	1.31	3.39	0.54	1.91
	c108378f1p04423	-6.23	7.38e-06	0.000574	0.96	6.35	9.53	7.14	7.04	10.14	4.37	1	0.48	1.37	1.14	1.72	0.45	1.14
	c108394f1p34744	-6.23	9.19e-06	0.01	4.36	11.33	1.82	8.6	17.77	9.34	3.56	0.35	0.87	1	2	0.94	1.49	2.46
	c108396f1p04342	-5.1	4.04e-06	0.00513	0.66	2.95	3.32	5.33	4.09	4.03	6.33	0.49	0.41	0.94	0.48	1.14	0.52	1.25
	c108416f1p04264	-4.61	3.62e-06	0.01	0.88	3.62	3.92	3.71	6.26	2.56	3.84	0.26	0.13	0.67	0.96	1.72	0.41	1.23
	c10841f1p0664	-7.1	4.37e-05	0.00184	3.32	33.95	18.04	62.26	60.19	39.91	48.57	1.39	3.37	3.08	5.61	13.7	3.44	6.89
	c108422f1p04715	-6.42	3.45e-06	0.00669	0.68	3.3	5.52	2.55	4.56	2.01	3	0.44	0.07	0.29	0.17	1.73	0.23	0.43
	c108431f1p04575	-6.04	5.53e-06	0.000591	1.1	4.38	5.28	5.2	7.61	7.01	4.36	0.5	0.63	0.53	1.07	1.44	0.55	1.05
	c108471f1p04184	-5.93	3.17e-06	0.01	0.15	2.36	2.51	4.18	5.54	2.37	3.17	0.28	0.08	0.87	0.47	0.82	0.25	0.65
	c108473f1p45077	-4.91	5.59e-06	0.00107	0.69	5.5	7.1	4.47	7.64	5.35	6.84	0.52	0.53	0.83	0.54	2.75	0.77	1.71
	c10847f2p1787	-9.49	1.47e-05	0.00797	2.57	15.2	27.33	4.04	8.17	9.65	18.72	2.55	0.14	2.21	1.8	1.26	1.06	0
	c10848f8p0791	-6.4	9.68e-06	7.32e-05	2.32	7.67	14.6	8.9	8.13	8.9	8.79	0.69	0.71	1.34	1.22	2.72	1.42	1.17
	c108491f1p05178	-6.54	4.51e-06	0.00162	1.03	4.09	4.71	3.4	3.8	4.77	6.12	0.64	0.41	0.41	0.45	1.31	0.38	0.68
	c108504f1p04880	-6.69	3.96e-06	0.00319	0.71	3.93	3.91	3.44	5.51	3.82	3.24	0.62	0.3	0.25	0.53	0.88	0.46	0.63
	c108505f1p04924	-6.32	3.66e-06	0.00563	1.16	4.32	4.18	1.55	5.42	1.08	4.67	0.34	0.23	0.69	0.04	1.43	0.55	0.27
	c108506f1p04906	-5.88	7.48e-06	0.000206	1.36	6.59	10.24	4.84	8.1	6.76	8.65	0.68	0.57	1.11	0.64	2.64	0.44	1.84
	c10850f9p21284	-6.09	2.37e-05	0.000242	4.94	29.57	9.89	25.4	27.69	20.86	30.32	3.59	0.87	3.19	2.9	7.34	1.97	4.56
	c108515f1p04705	3.62	-0.000376	8.78e-05	323.42	45.63	8.43	83.81	4.2	49.2	61.8	327.57	337.68	286.35	314.82	243.5	338.49	240.6
	c10851f1p01356	-4.79	9.93e-06	0.000187	2.44	11.76	13.09	11.18	12.65	7.84	6.87	1.48	0.41	1.84	1.1	3.78	1.29	3.83
	c108521f1p05168	-10.07	2.91e-06	0.00713	0.23	2.29	2.02	3.14	1.94	2.79	4.33	0.2	0.07	0.54	0.12	0.43	0.06	0.25
	c108523f1p04391	-5.17	2.77e-05	9.07e-05	6.58	32.29	20.71	24.49	24.02	34.76	38.39	2.51	1.79	6.31	5.42	7.84	2.63	8.53
	c108534f1p14543	-5.57	3.64e-06	0.00675	0.9	5.13	3.49	2.65	3.13	3.93	4.2	0.39	0.22	0.58	0.71	1.22	0.44	0.64
	c108542f1p04318	-3.64	7.19e-06	0.00515	1.5	9.1	6.43	5.59	10.54	10.88	9.22	1.07	0.1	1.38	1.64	4.27	1.05	5.14
	c108554f1p04666	-5.65	3.62e-06	0.00671	0.95	3.27	4.08	3.3	4.64	3.9	3.04	0.34	0.14	0.52	0.49	1.29	0.41	0.9
	c10855f7p21284	-6.99	9.41e-06	0.000917	2.93	13.88	2.8	10.72	6.86	11.58	7.89	0.2	0.96	0.82	0.12	0.96	1.42	3.63
	c108564f1p14416	-6.73	4.62e-06	0.00978	0.81	3.06	7.97	3.49	6.65	4.72	1.38	0.23	0.33	0.53	0.47	2.02	0.24	0.35
	c108571f1p05077	-5.95	9.21e-06	0.000303	1.63	9.54	11.4	9.18	12.53	4.8	8.57	0.67	0.66	1.31	1.51	2.63	1.27	1.63
	c10857f2p0603	-7.57	4.26e-06	0.00354	0.3	3.15	7.16	3.8	5	2.74	2.99	0.48	0	0.38	0	1.64	0.48	0.34
	c10858f8p41278	-5.24	1.28e-05	0.00015	2.95	16.28	6.66	14.29	15	14.15	14.03	0.49	0.35	3.08	2.62	4.21	1.46	3.7
	c1085f4p31074	-6.55	2.53e-05	0.000491	4.97	16.66	35.55	25.24	37.05	23.44	13.62	2.38	2.82	1.62	2.99	6.71	3.49	3.88
	c108600f1p34380	-6.93	4.03e-06	0.00274	0.62	6.25	3.32	3.31	4.38	2.65	4.23	0.15	0.13	0.94	0.62	1.12	0.2	0.42
	c108604f1p14790	-5	1.42e-05	9.35e-05	2.71	13.54	18	11.93	19.67	14.04	13.47	1.73	1.29	2.01	2.18	5.48	1.86	4.12
	c108610f1p05112	-6.34	6.35e-06	0.000207	1.3	6.07	5.93	4.95	8.21	7.36	5.82	0.68	0.29	0.67	0.6	1.66	0.89	1.47
	c10862f1p11073	-6.11	5.41e-06	0.00593	0.17	8.23	6.85	3.21	3.52	4.62	7.11	0.19	0.31	0.28	0.76	3.08	0.27	0.62
	c108630f1p05017	-6.73	6.46e-06	0.000159	1.22	7.52	7.77	5.38	6.58	7.12	4.29	0.62	0.3	0.59	0.5	1.52	0.95	1.44
	c108631f1p04845	-5.09	6.04e-06	0.000577	1.42	7.18	6.69	5.37	6.7	5.74	6.93	0.76	0.35	1.28	0.97	1.52	0.97	2.03
	c10863f1p01152	-6.13	6.16e-06	0.000284	1.14	5.23	7.68	4.56	8.38	6.61	5.3	0.71	0.4	1.14	0.53	1.76	0.63	1.18
	c108643f1p03038	-4.75	3.65e-05	6.06e-05	8.13	47.11	29.63	37.66	50.76	36.69	36.49	3.71	2.95	9.54	5.95	12.76	5.17	11.83
	c108649f1p04421	-5.69	4.84e-06	0.00156	1.14	7.06	4.63	3.65	4.97	3.51	6.09	0.57	0.2	0.77	0.97	1.68	0.21	1.05
	c108663f1p04617	-4.33	3.67e-06	0.01	1.09	3.74	4.28	3.22	4.7	4.15	4.49	0.71	0.73	0.87	0.57	1.71	0.34	1.02
	c108664f1p04785	-9.02	2.78e-06	0.00981	0.54	2.36	2.46	2.89	3.18	3.48	1.26	0.06	0.05	0.23	0.29	0.46	0.19	0.51
	c108674f2p04388	-6.84	4.22e-06	0.00221	0.4	3.39	5.35	3.24	5.01	4.89	3.76	0.4	0.03	0.81	0.37	1.17	0.45	0.58
	c10868f6p11136	-5.42	6.98e-06	0.000214	1.54	7.78	8.38	5.77	8.87	4.25	7.7	0.15	0.1	1.93	1.24	2.62	0.73	1.4
	c108708f1p14456	-5.86	3.15e-06	0.01	0.35	2.96	3.7	2.42	4.19	3.56	3	0.31	0.18	0.61	0.47	0.85	0.36	0.66
	c108718f1p05009	-4.84	6.67e-06	0.000727	1.33	9.06	4.1	6.95	9.19	6.83	6.54	1.07	0.31	1.44	2.06	1.81	0.99	1.41
	c108736f1p15032	-5.78	1.51e-05	2.16e-05	2.61	15.24	14.92	13.02	17.43	15.77	16.35	1.49	1	2.34	2.39	4.4	1.8	3.07
	c10873f1p01290	-5.34	8.54e-06	0.000521	1.57	8.6	9.62	10.59	12.31	5.14	7	0.78	0.17	1.82	1.04	3.08	0.71	2.67
	c108746f1p04427	-4.55	6.52e-06	0.01	1.83	7.71	13.32	3.65	5.92	3.98	7.98	1.47	0.56	1.48	1	2.91	0.74	1.61
	c108757f1p14640	-5	6.81e-06	0.000415	1.27	10.01	6.74	6.53	7.92	4.98	6.79	0.35	0.24	1.91	0.71	2.98	0.98	1.68
	c10876f4p11585	-5.38	4.77e-06	0.00204	0.41	6.24	5.74	4.91	4.93	3.05	6.05	0.32	0.42	0.96	0.85	1.51	0.37	1.39
	c108779f1p14694	-4.22	3.96e-06	0.00948	0.37	4.25	6.33	4.03	6.01	3.03	4.2	0.49	0.17	0.68	0.29	2.82	0.56	1.7
	c108783f1p13849	-6.53	1.59e-05	0.00133	2.38	11.27	11.29	18.67	25.33	19.44	9.47	1.02	1.22	2.12	2.22	3.71	2.03	2.67
	c108784f1p101837	-4.49	1.11e-05	0.00651	3.5	2.64	9.82	16.53	17.49	11.87	13.61	0.64	0.3	4.33	0.53	5.63	1.65	3.72
	c108791f1p04586	-4.93	2.53e-05	0.000143	5.14	29.83	29.14	28.59	32.62	26.5	16.7	1.58	1.46	2.87	5.23	10.42	2.58	10.05
	c108798f1p04667	-6.03	3.12e-06	0.01	0.66	3.78	3.12	1.84	3.59	3.64	3.06	0.33	0.12	0.36	0.24	1.02	0.27	0.93
	c108806f1p04783	-5.54	4.1e-06	0.00402	0.56	3.08	5.37	3.31	6.06	3.81	4.44	0.39	0.12	0.44	0.73	1.83	0.25	1.04
	c108815f1p05012	3.92	-0.000269	0.000173	233.46	28.31	6.23	34.17	1.77	37.91	31.04	226.66	251.15	198.49	218.54	163.34	246.23	158.45
	c108819f1p34555	-4.81	1.57e-05	8.5e-05	4.91	18.38	12.93	12.78	14.56	23.77	17.3	1.26	0.74	3.37	3.13	5.63	2.48	5.16
	c10881f1p01272	-7.04	2.82e-06	0.01	0.65	2.31	2.72	3.98	3.56	1.41	2.62	0.36	0.18	0.83	0.41	0.19	0.2	0.28
	c108827f1p15108	-6.09	5.25e-06	0.00423	0.77	3.96	9.39	4.4	6.53	4.02	3.56	0.62	0.22	0.86	0.71	1.55	0.55	0.84
	c108844f1p45061	-5.06	5.76e-05	8.12e-05	8.77	55.25	57.47	70.87	53.48	63.62	71.52	4.82	1.66	10.54	14.81	19.17	4.43	19.86
	c108850f1p04490	-5.08	5.97e-06	0.000598	1.76	7.44	5.13	5.07	7.29	6.81	5.9	0.6	0.47	1.16	0.84	2.65	0.46	1.58
	c108857f1p14556	-6.36	3.06e-06	0.01	0.22	3.1	3.53	2.5	2.81	3.49	3.55	0.25	0.17	0.58	0.13	1.01	0.44	0.44
	c108861f1p05052	-4.83	5.68e-06	0.000972	1.34	5.36	4.04	8.39	6.83	5	7.14	0.49	0.15	1.94	1.07	1.66	0.89	1.68
	c108863f1p04585	-5.4	4.24e-06	0.00361	1.06	7.15	4.73	3.87	3.19	3.29	4.37	0.62	0.39	0.78	0.6	1.64	0.38	0.71
	c108868f1p04632	-5.45	5.07e-06	0.00137	0.55	6.21	6.01	5.67	3.7	4.08	6.8	0.62	0.1	0.88	0.63	2.41	0.4	1.02
	c10888f1p0835	-8.92	8e-06	0.00272	1.1	3.53	12.09	4.86	10.86	4.79	9.31	0.25	0.13	1.81	0.62	1.19	0.6	0.61
	c108904f1p14520	-6.77	5.56e-06	0.000443	0.59	5.52	6.64	4.41	6.86	5.46	4.95	0.44	0.35	0.6	0.46	1.46	0.74	1.02
	c108912f1p04823	-5.72	8.32e-06	0.000576	1.76	11.81	7.1	6.42	7.36	5.93	12.04	0.71	0.26	2.12	1.31	2.97	0.53	1.26
	c108913f1p44559	-5.4	4.36e-06	0.00316	0.65	4.69	5.17	3.21	5.02	3.82	5.9	0.59	0.2	0.72	0.59	1.87	0.23	1.07
	c10891f3p1678	-11.53	5.76e-05	5.81e-05	5.29	48.84	55.14	56.28	64.9	29.11	67.46	7.91	0	3.91	4.94	9.88	1.72	0
	c108925f1p04345	-5.48	4.96e-06	0.00411	1.22	4.25	4.13	4.71	9.12	2.72	5.44	0.75	0.74	0.68	0.8	1.38	0.64	0.78
	c108929f1p04789	-5.01	4.14e-06	0.00728	0.59	3.39	5.43	4.55	7.27	2.64	3.11	0.66	0.26	0.81	0.61	1.56	0.5	0.97
	c108942f1p03935	-5.46	1.38e-05	5.78e-05	4.08	20.4	12.22	12.31	10.92	11.45	16.74	2.05	0.64	3.52	2	4.54	0.65	2.74
	c108950f1p04446	-6.01	2.3e-05	0.000177	4.28	22.62	32.07	11.87	21.61	26.3	26.09	2.12	1.67	2.65	3.85	7.81	1.8	4.2
	c108951f1p24328	-5.92	0.000137	4.6e-05	25.69	96.58	158.87	162.85	164.85	155.37	107.2	11.1	6.16	23.36	16.99	40.67	16.5	32.52
	c108954f1p15124	-7.41	5.15e-06	0.00381	0.71	3.09	8.43	3.57	7.12	3.02	4.76	0.49	0.11	0.44	0.68	1.1	0.43	0.89
	c10896f1p1667	-6.19	0.000328	0.00529	66.29	619.19	164.24	258.55	292.99	253.11	407.47	19.28	18.98	55.75	23.67	170.38	32.78	12.17
	c108977f1p15058	-4.75	4.93e-06	0.00229	1.54	7.94	4.59	5.74	3.63	4.06	5.71	0.32	0.46	1.33	0.91	2.47	0.43	1.07
	c108985f1p05208	-3.4	2.39e-05	0.0054	5	27.14	33.66	24.99	23.55	26.63	45.39	6.84	0.54	12.06	5.18	16.77	6.23	7.17
	c10898f3p21056	-5.96	2.44e-05	0.00399	3.65	32.45	8.19	27.37	39.56	23.09	19.97	1.66	2.33	2.15	1.41	12.04	1.77	4.52
	c10899f6p11381	-4.35	4.14e-06	0.01	0.47	3.01	2.09	6.66	4.11	6.1	5.84	0.03	0.32	1.59	1.73	1.44	0.54	0.86
	c109002f1p04504	-9	2.66e-06	0.01	0.24	3.66	3.49	2.43	3.19	0.89	1.88	0.1	0.6	0.25	0.17	0.33	0.19	0.11
	c10900f4p21359	-5.02	2.16e-05	2.09e-05	5.68	24.62	21.03	22.15	25.7	17.57	25.47	1.66	2.39	2.95	4.11	8.7	1.56	6.96
	c109017f1p04710	-8.02	3.75e-06	0.0031	0.47	4.6	4.44	2.36	5.19	2.75	2.69	0.32	0.1	0.26	0.14	1.05	0.33	0.61
	c109036f1p02131	-3.7	1.89e-05	0.00328	6.54	13.4	18.32	15.78	32.6	22.69	30.86	3.14	1.15	6.74	4.99	11.51	2.8	7.56
	c109052f1p14969	-4.1	3.67e-06	0.01	1.02	4.32	4.5	4.64	4.92	2.41	4.55	0.45	0.54	1.05	1.17	1.15	0.64	1.44
	c10906f1p3868	-4.69	3.96e-06	0.00756	0.32	3	5.65	6.55	3.92	3.02	3.84	0.29	0.52	0.17	0.86	1.14	0.91	1.72
	c109094f1p05028	-5.67	7.53e-06	9.09e-05	1.91	8.87	6.35	7.12	9.25	6.7	8.1	0.76	0.75	1.26	1.08	2.2	0.79	1.67
	c109116f1p04842	2.33	-5.65e-05	0.000237	61.25	16.36	10.4	23.09	8.29	19.35	24.04	54.42	53.44	55.28	56.02	55.7	58.03	45.99
	c109117f1p04599	-6.94	6.66e-06	0.00166	0.16	8.17	5.74	3.43	9.55	7.02	6.24	0.38	0.32	1.43	0.76	0.88	0.63	1.4
	c109122f1p04597	-6.53	4.03e-06	0.00332	0.72	6.32	3.34	2.16	5.67	3.07	3.13	0.34	0.23	0.66	0.22	1.32	0.29	0.68
	c10912f1p01217	-4.88	4.92e-06	0.00829	1.13	3.13	3.79	7.16	4.86	3.4	8.9	0.69	0.18	0.75	0.43	2.85	0.85	0.89
	c109131f1p04439	-4.82	3.55e-06	0.01	0.54	3.36	4.33	4.02	4.52	3.02	4.23	0.33	0.4	0.73	0.49	1.6	0.42	1.01
	c109139f1p04779	-5.01	1.46e-05	2.7e-05	3.18	13.87	14.45	15.23	16.77	13.68	18.29	1.79	1.17	2.86	2.06	4.92	2.05	4.22
	c109140f1p04179	-5.17	8.27e-06	0.00136	1.47	7.45	10.43	9.5	6.45	5.29	13.12	0.88	0.49	2.24	1.07	3.23	0.79	1.68
	c109141f1p04903	-5.28	4.12e-06	0.00447	0.77	3	6.76	3.46	4.93	3.51	4.7	0.53	0.3	0.76	0.68	1.45	0.55	0.88
	c109156f1p14440	-6.51	3.39e-06	0.00907	0.95	6.35	3.73	1.82	3.74	1.64	2.37	0.37	0.15	0.51	0.59	0.91	0.31	0.33
	c109164f1p14882	-3.63	5.28e-06	0.01	3.88	2.59	8.27	7.98	3.85	3.28	9.16	0.8	0.23	1.19	0.59	4.4	1.22	2.33
	c109171f1p14519	-4.3	1.45e-05	0.000177	3.78	16.17	17.67	10.83	17.14	13.06	21.48	2.23	1.96	3.58	2.02	5.96	2.11	5.44
	c109188f1p05359	-8.36	2.62e-06	0.01	0.84	2.72	4.12	3.15	0.45	1.52	2.65	0.37	0.06	0.06	0.07	0.83	0.26	0.2
	c10919f1p01708	-6.39	2.12e-05	7.31e-05	3.52	23.64	30.82	18.94	16.51	17.5	20.95	1.58	1	2.76	2.32	6.08	1.91	4.98
	c109208f1p04950	-8.63	3.28e-05	5.3e-05	6.17	21.03	36.05	32.37	20.6	31.82	43.29	1.3	0.3	4.34	1.6	6.5	1.87	6.26
	c109234f1p04418	-6.49	3.99e-06	0.00319	0.64	5.47	2.46	3.73	3.73	3.55	5.2	0.47	0.03	0.51	0.25	1.28	0.24	1.05
	c109258f1p04695	-5.63	7.5e-06	9.78e-05	1.39	7.24	8.98	6.69	9.51	6.62	7.97	0.85	0.55	1.06	0.95	2.84	0.8	1.55
	c109263f1p05009	-6.96	2.91e-06	0.01	0.67	2.71	3.96	2.8	1.15	5.1	0.99	0.2	0.07	0.65	0.21	0.79	0.26	0.32
	c109276f1p04606	-5.65	3.99e-06	0.00424	1.01	3.25	5.07	5.45	2.75	3.21	4.82	0.31	0.12	0.82	0.26	1.48	0.57	0.97
	c109280f1p14768	-5.53	3.17e-06	0.01	0.66	2.94	3.61	2.6	4.51	2.14	4.05	0.38	0.16	0.59	0.26	1.64	0.22	0.45
	c109282f1p04467	-7.85	3.2e-06	0.0063	0.74	4.54	1.03	3.51	1.72	4.57	2.86	0.08	0.28	0.29	0.42	0.44	0.38	0.53
	c10930f3p1890	-6.16	7.62e-06	0.00064	1.03	9.35	11.35	5.63	5.81	5.89	8.12	1.04	0	1.87	0.42	2.42	0.7	1.21
	c109313f1p04815	-6.6	3.61e-06	0.00512	0.55	2.56	4.59	3.51	4.4	2.5	4.3	0.38	0.14	0.55	0.15	1.05	0.29	0.83
	c109317f1p04395	-5.08	3.58e-05	2.83e-05	10.83	45.52	31.68	27.24	47.35	33.88	38.56	3.56	2.78	6.2	4.55	16.32	4.43	8.4
	c109365f1p14771	-5.12	6.89e-06	0.000351	0.92	8.71	6.98	4.74	7.94	7.97	7.18	0.49	0.37	1.66	1.18	2.16	0.52	2.28
	c109369f1p04911	-5.74	5.05e-06	0.00881	1.57	6.97	2.84	2.94	7.11	8.24	2.09	0.27	0.18	0.92	1.41	1.01	0.49	1.25
	c10936f1p0860	-7.87	6.19e-06	0.0085	0.96	4.22	9.2	5.1	10.96	2.88	3.38	0.34	0	0.61	0	2.2	0.43	1.07
	c109374f1p04001	-5.43	5.63e-06	0.000697	1.97	7.91	4.49	6.56	6.53	5.01	3.91	0.55	0.22	1.21	0.5	2.61	0.6	1
	c109376f1p04520	-5.24	6.69e-06	0.00216	1.7	7.79	4.34	4.26	10.86	8.97	5.27	0.84	0.56	1.73	1.2	2.31	0.65	0.94
	c109379f1p84434	-4.27	6.92e-05	0.000219	11.6	74.78	90.12	83.53	82.59	73.16	70.23	7.79	2.95	17.53	10.62	36.75	6.72	31.34
	c109388f1p04805	-7.23	2.87e-06	0.01	0.71	2.29	2.77	3.07	2.69	1.35	4.48	0.1	0.12	0.1	0.48	0.86	0.46	0.29
	c109397f1p04665	-6.65	1.21e-05	0.000427	2.7	19.73	9.34	11.99	9.22	7.59	13.29	0.44	0.57	2.23	2.06	1.63	1.2	2.99
	c10939f2p0594	-5.7	5.93e-06	0.00197	1.39	8.17	3.64	8.88	2.97	6.04	6.08	0.42	0.19	0.89	0.38	2.51	0.49	1.64
	c10941f1p11009	-5.63	3.41e-06	0.00851	1.28	0.69	4.72	2.55	5	3.15	4.41	0.29	0.22	0.45	0.96	0.98	0.25	0.71
	c109424f1p03956	-5.21	1.67e-05	0.000109	3.06	13.92	21.6	18.85	18.71	12.58	20.18	1.49	1.19	3.44	1.45	6.68	1.89	4.76
	c109429f1p14419	-7.14	6.89e-06	0.00541	0.98	9.76	4.86	3.32	11.86	6.21	4.59	0.09	0.79	0.29	0.89	2.09	0.49	1.19
	c109449f1p04786	-5.44	4.22e-06	0.00357	1.03	3.62	3.41	3.48	7.03	4.57	4.23	0.71	0.05	0.56	0.28	1.33	0.75	1.36
	c109451f1p124611	-4.29	7.3e-05	0.00743	22.85	50.09	55.28	148.89	55.83	81.05	92.74	8.41	6.63	16.97	11.72	36.26	7.41	30.64
	c109456f1p15084	-5.63	5.73e-06	0.000591	0.98	6.64	4.93	4.88	7.11	5.56	6.83	0.61	0.29	0.67	0.86	1.72	1.06	1.34
	c109459f1p04501	-5.24	4.2e-06	0.0041	0.74	4.43	5.96	3.35	4.9	4.23	4.05	0.35	0.22	1.09	0.65	1.73	0.44	0.79
	c109472f1p04687	-4.15	6.46e-06	0.00589	1.76	8.71	3.59	6.38	5.53	7.27	11.85	0.67	0.49	1.9	1.67	2.68	1.43	2.03
	c109484f1p04744	-5.34	6.87e-06	0.000177	1.16	7.24	4.56	7.53	7.6	7.16	8.47	0.55	0.35	1.37	0.99	2.58	0.97	1.37
	c1094f6p1711	-7.29	6.2e-06	0.00868	1.42	3.66	5.28	5.8	12.06	6.8	2.15	0.41	0.16	0.64	0.31	1.51	1.05	1.01
	c109509f1p04136	-5.16	3.71e-06	0.00742	0.98	4.73	5.63	3.21	3.47	3.09	3.37	0.41	0.15	0.56	0.57	1.67	0.44	0.94
	c10952f23p1768	-6.17	3.06e-05	0.000491	11.37	21	25.94	55.41	22	26.24	28.42	3.76	0.88	8.18	2.42	6.46	1.89	7.23
	c109549f1p14606	-5.99	3.22e-06	0.01	0.52	2.89	3.38	2.93	3.8	2.81	4.07	0.31	0.12	0.38	0.48	1.2	0.32	0.59
	c109562f1p04216	-4.67	1.49e-05	0.004	3.89	7.22	25.48	12.77	21.2	17.34	12.5	1.41	0.43	2.41	1.96	8.79	1.89	4.6
	c109564f1p03495	-4.41	1.3e-05	0.00183	3.33	12.57	12.42	12.42	24.3	9.69	15.4	1.72	0.52	3.09	2.14	6.66	2.4	3.89
	c10957f1p01859	-6.44	8.82e-06	0.000381	1.09	5.3	11.16	9.95	11.51	6.82	8.36	0.67	0.72	1.3	0.84	2.44	0.65	1.79
	c1095f12p1616	-4.53	7.54e-05	8.22e-05	14.13	78.84	84.31	100.83	80.99	89.35	69.06	5.15	4.71	18.75	19.28	28.51	8.41	29.36
	c109617f1p04358	-7.66	3.8e-06	0.00301	0.61	3.89	3.04	1.88	4.71	4.24	4.46	0.37	0.18	0.17	0.12	0.87	0.45	0.81
	c109634f1p13138	-6.26	6.65e-06	0.00148	0.53	4.25	10.3	5.28	5.67	7.08	7.84	0.2	0.18	1.74	0.17	2.06	0.6	1.61
	c109644f1p04591	-11.73	4.47e-06	0.00994	0.34	4.09	5.39	4.49	1.49	1.51	7.67	0.24	0.05	0.23	0.29	0.52	0.24	0.55
	c109650f1p03526	-5.67	1.26e-05	0.000209	2.71	15.16	16.54	11.03	16.8	9.8	8.34	1.48	0.6	1.89	1.39	4.82	0.34	3.66
	c109656f1p04680	-5.49	4.14e-06	0.00361	1.69	1.81	3.27	4.58	6.46	5.89	2.73	0.05	0.5	0.63	0.46	1.09	0.52	1.55
	c109660f1p04451	-4.9	1.99e-05	3.95e-05	6.19	14.76	19.41	23.24	18.2	25.74	23.86	2.04	0.83	4.14	4.29	9.02	1.3	5.19
	c109685f1p03212	-4.76	9.56e-06	0.00833	1.03	7.02	13.66	9.44	16.53	4.34	12.43	1.23	0.49	1.89	1.23	4.04	0.96	3.7
	c10969f1p11545	-5.71	9.59e-06	0.00572	3.69	17.96	5.14	6.39	12.98	4.38	10.44	0.6	1.01	1.27	0.63	4.44	1.43	1.3
	c109702f1p04524	-5.45	3.19e-06	0.01	0.43	2.3	3.32	4.75	3.54	3.05	3.38	0.54	0.12	0.38	0.31	1.52	0.33	0.6
	c109722f1p34485	-7.94	1.18e-05	3.69e-05	1.24	13.99	12.12	8.51	10.89	10.53	12.38	0.69	0.32	1.05	0.84	3.28	1.01	1.59
	c109742f1p05032	-5.27	6.88e-06	0.000212	1.39	6.68	6.85	7.15	7.69	7.32	7.98	0.69	0.69	1.29	1.05	2.63	0.6	1.59
	c109749f1p14940	-11.33	2.69e-06	0.00917	0.22	2.63	2.6	2.29	2.81	2.26	2.5	0.19	0.16	0.15	0.21	0.18	0.26	0.2
	c10975f1p01150	-7.27	1.78e-05	0.00441	4.29	7.04	19.07	7.95	25.91	28.85	14.17	1.34	0	3.6	2.96	4.36	1.79	0.71
	c109788f1p04526	-4.83	4.62e-06	0.00381	0.5	3.15	7.57	4.25	5.82	4.2	4.8	0.48	0.39	0.55	0.49	2.64	0.22	1.51
	c109793f1p14517	-8.12	8.3e-06	0.00291	0.16	3.25	11.68	5.57	8.01	10.26	10.06	0.66	0.59	1.49	0.69	0.16	0.54	1.9
	c109795f1p05153	-5.21	3.65e-06	0.00768	0.78	3.23	4.56	2.8	3.89	3.8	4.94	0.35	0.43	0.47	0.33	1.46	0.44	1.12
	c109807f1p14842	-5.44	5.72e-06	0.00138	0.91	7.58	8.51	4.31	5.43	4.04	5.73	0.26	0.28	1.16	0.17	3.22	0.84	0.79
	c109809f1p06193	-8.65	3.22e-06	0.00565	0.41	3.12	2.82	5.71	2.84	2.55	1.49	0.18	0.16	0.2	0.38	0.5	0.15	0.63
	c10980f1p02050	-8.46	9.26e-06	0.000181	1.11	7.48	13.5	9.18	8.31	8.63	5.8	1.08	0.27	0.62	0.18	2.21	0.71	1.32
	c10981f2p01843	-6.59	1.02e-05	9.33e-05	1.69	9.96	11.96	8.32	7.17	9.12	13.56	0.88	0.18	0.98	1.01	3.09	0.72	2.51
	c109831f1p05272	-5.47	6.05e-06	0.000451	1.46	6.75	7.15	5.61	6.91	6.05	5.25	0.58	0.39	0.64	0.68	2.72	0.69	1.46
	c109833f1p04871	-5.31	3.13e-06	0.01	0.91	2.66	3.31	3.09	5.07	2.53	2.9	0.24	0.21	0.48	0.44	1.17	0.4	0.92
	c109838f1p02042	-5.13	5.57e-06	0.00622	0.72	5.51	6.92	3.94	5.43	3.58	10.07	0.25	0.55	0.48	0.76	1.86	0.63	2.51
	c109842f1p14679	-4.58	8e-06	0.000129	1.67	9.25	7.4	9.42	9.5	9.08	8.52	1.12	0.69	1.75	1.76	2.6	0.99	3.06
	c109845f1p04651	-7.79	4.28e-06	0.00157	0.61	4.8	4	3.04	3.87	3.73	5.61	0.25	0.5	0.6	0.35	0.73	0.25	0.61
	c109856f1p04284	-4.77	5.22e-06	0.00169	1.2	4.73	6.8	4.89	6.32	6.09	5.22	1.08	0.05	0.94	0.99	1.87	0.6	1.86
	c109861f1p24732	-5.16	6.91e-06	0.00022	1.94	8.31	5.36	6.33	9.27	7.75	6.46	0.87	0.69	1.07	1.1	2.27	1	1.81
	c109866f1p04967	-5.18	4.87e-06	0.00251	0.9	4.44	6.74	6.92	6.09	2.99	3.23	0.65	0.07	0.49	0.89	1.89	0.57	1.49
	c109888f1p04256	-6.24	4.63e-06	0.00165	0.58	5.65	6.02	5.85	4.23	3.36	3.49	0.33	0.24	0.6	0.65	1.86	0.37	0.63
	c109895f1p02668	-5.52	1.07e-05	0.000902	1.83	11.36	7.17	7.42	16.15	10.06	14.64	1.25	0.54	1.87	1.32	3.17	1.15	3.14
	c10989f1p01049	-5.6	4e-06	0.00461	0.17	3.79	5.22	2.45	5.64	3.55	5.29	0.4	0.75	0.79	0.78	0.31	0.55	1.08
	c1098f13p51520	-5.41	3.22e-06	0.01	1.09	3.99	2.94	3.07	3.56	3.72	2.47	0.36	0.15	0.9	0.44	1.2	0.27	0.54
	c109914f1p13264	-4.72	5.62e-06	0.00397	0.65	5.42	9.06	5.64	7.49	3.13	6.05	0.76	0.51	1.44	0.41	2.53	0.43	1.84
	c109916f1p15123	-7.6	1.01e-05	6.75e-05	1.4	8.18	11.53	11.08	12.11	6.48	8.83	0.62	0.48	1.48	1.09	2.1	0.82	1.26
	c109929f1p14344	-4.5	1.13e-05	0.00289	2.29	9.02	13.26	8.59	20.65	9.54	14.02	1.1	0.57	2.9	1.89	5.3	1.79	3.66
	c109938f1p04904	-5.06	5.82e-06	0.00111	1.07	5.96	5.23	4.12	8.93	7.42	5.04	0.57	0.55	1.68	1.18	1.65	0.65	1.18
	c109940f1p04796	-12.57	7.81e-06	0.000592	0.17	4.93	6.26	5.64	10.46	5.78	10.09	0.68	0.19	0.58	0.62	0.36	0.09	0.94
	c10994f1p0607	-7.16	4.13e-05	0.00528	6.18	34.68	70.04	60.11	14.68	23.31	43.3	3.16	1.47	4.1	2.93	11.53	4.29	7.75
	c109955f1p04552	-5.32	3.24e-06	0.01	0.44	2.97	4.37	3.59	2.29	3.33	4.21	0.25	0.27	0.68	0.46	1.32	0.25	0.76
	c109969f1p34671	-5.44	1.41e-05	0.000166	2.97	13.58	19.18	16.61	14.54	8.36	15.38	1.43	0.55	1.23	1.61	6.07	1.54	4.25
	c109980f1p05395	-5.43	3.02e-06	0.01	0.54	2.28	3.02	3.11	3.96	2.96	3.8	0.4	0.23	0.76	0.44	1.06	0.24	0.5
	c110006f1p04775	-5.17	3.82e-06	0.00652	0.62	4.22	3.77	3.29	5.18	4.53	3.63	0.43	0.34	0.64	0.52	0.93	0.53	1.49
	c110009f1p04790	-5.31	4.37e-06	0.00328	0.83	4.47	6.44	3.4	5.26	4.77	3.5	0.47	0.42	0.44	0.86	1.73	0.46	1
	c11000f2p11043	-5.8	2.24e-05	0.000535	2.38	28.76	23.25	33.28	22.12	19.06	14.53	0.68	1.83	2.61	4.71	5.87	2.95	6.06
	c110032f1p04905	-6.2	8.1e-06	0.000175	1.97	7.85	10.83	3.94	7.43	9.77	8.11	0.61	0.71	0.71	1.28	2.92	0.71	1.11
	c110045f1p14988	-6.66	5.04e-06	0.000822	0.99	6.73	4.25	3.08	5.75	4.84	5.51	0.37	0.36	0.36	0.52	1.96	0.54	0.57
	c11005f2p11127	-6.14	3.02e-06	0.01	0.98	3.07	2.94	2.64	1.68	3.06	4.44	0.07	0.2	0.47	0.13	1.69	0	0.5
	c11006f2p21128	-5.19	4.32e-06	0.00339	1.95	3.99	5.23	7.6	2.12	4.27	2.95	0.37	0.69	1	0.46	1.32	0.29	1.27
	c110076f1p04356	-7.34	3.28e-06	0.00664	0.8	4.51	3.85	2.28	4.23	3.09	1.17	0.48	0.2	0.35	0.44	0.74	0.23	0.28
	c11007f2p0618	-7.71	8.96e-06	0.00144	1.19	10.07	4.66	6.33	7.73	8.68	14.57	1.22	0.36	0.86	1.32	1.87	0.87	0.41
	c110081f1p05348	-4.8	4.79e-06	0.00262	1.27	6.16	5.95	4.9	4.29	5.14	4.57	0.51	0.57	1.09	0.45	1.91	0.71	1.49
	c110082f1p04500	-4.74	8.08e-06	0.01	1.45	5.51	10.87	10.22	14.73	1.99	9.7	0.57	0.75	1.53	1.31	3.31	1.38	2.66
	c11008f1p0705	-5.15	7.94e-06	0.00551	0.9	7.3	5.87	10.63	10.43	4.07	12.87	0.82	0.31	1.06	1.04	4.18	1.4	1.3
	c110096f1p14530	-4.18	6.75e-06	0.01	0.85	6.2	7.49	10.22	2.76	8.47	11.39	1.22	0.47	0.82	1.48	3.69	0.23	3.42
	c11009f1p01017	-5.13	6.6e-06	0.01	0.9	11.4	10.34	4.05	5.57	2.98	8.19	0.41	0.44	2.3	2.27	0.97	0.65	1.41
	c110117f1p04625	-5.88	1.37e-05	0.00071	2.5	23.72	13.63	10.18	13.63	10.7	12.17	1.1	0.78	1.74	2.7	3.92	1.04	3.45
	c110128f1p24885	-5.91	2e-05	3.36e-05	3.3	18.69	16.68	19.33	20.46	24.65	23.01	1.06	1.23	3.35	3.09	5.2	1.49	5.9
	c110145f1p04650	-6.27	6.44e-06	0.000775	0.99	6.1	9.5	3.19	6.49	5.95	7.4	0.6	0.36	0.54	0.99	2.31	0.58	0.95
	c110153f1p34935	-4.75	1.29e-05	6.01e-05	2.62	14.59	16	11.81	16.47	12.23	12.03	1.33	1.18	2.59	2.03	5.15	2.23	3.52
	c110154f1p05091	-5.77	1.27e-05	0.00218	2.46	23.75	10.69	8.47	13.98	11.69	9.97	1.25	1.01	1.43	2.52	3.17	1.2	3.46
	c11015f1p0991	-6.93	3.61e-06	0.0047	0.46	4.2	4.22	4.1	3.31	3.06	2.81	0.08	0.45	0	0.08	1.42	0.34	0.83
	c110172f1p04804	-4.88	0.000304	0.00101	69.85	237.68	407.65	314.83	454.81	315.14	237.66	16.58	12.24	50.27	42.27	215.04	10.97	70.05
	c11017f1p11213	-5.85	0.000293	0.000756	42.57	243.16	391.48	267.08	489.03	229.24	217.87	21.01	18.09	38.18	43.64	71.93	48.83	79.71
	c110182f1p04546	-5.42	5.13e-06	0.00129	0.81	6.19	5.94	4.98	5.74	4.78	4.99	0.43	0.29	1.09	0.54	1.9	0.57	1.33
	c110183f1p04879	-4.65	5.89e-06	0.00122	1.21	3.95	7.63	6.01	9.07	5.75	5.57	0.52	0.36	1.19	1.03	2.47	0.65	2.21
	c110185f1p04205	-11.57	7.08e-06	0.00177	0.96	4.37	6.08	3.27	7.74	11.62	5.45	0.28	0.32	0.38	0.48	1.02	0.34	0.6
	c110206f1p04403	-4.62	4.24e-06	0.00538	1.02	5.56	5.22	3.71	5.19	4.02	4.27	0.47	0.46	0.93	0.46	2.03	0.49	1.44
	c110212f1p03928	-5.21	3.56e-06	0.00855	0.91	5.86	3.6	4.51	2.02	2.28	4.17	0.17	0.17	0.54	0.47	1.47	0.58	1.07
	c110213f1p0708	-14.48	2.43e-06	0.01	0.26	3.2	2.46	0.96	2.5	0.59	3.55	0	0	0.21	0.53	0.12	0	0.07
	c110220f1p12813	-6.31	1.77e-05	6.37e-05	5.54	10.95	19.35	9.91	21.78	21.59	19.97	0.46	0.87	1.96	3.7	5.52	1.43	3.35
	c110221f1p05045	-4.25	6.78e-06	0.00505	1.05	5.25	12.08	5.57	8.18	6.44	8.77	0.92	0.66	1.66	0.69	4.39	0.66	2.17
	c110244f1p04763	-5.7	4.1e-06	0.0038	0.52	2.4	6.44	4.25	4.17	3.53	5.13	0.51	0.52	0.54	0.51	1.66	0.17	0.72
	c11024f1p01361	-6.36	5.2e-06	0.000751	1.49	5.75	5.32	5.58	6.32	4.17	3.79	0.34	0.25	0.56	0.82	1.28	0.67	1.17
	c110261f1p15097	-5.02	3.49e-06	0.01	0.85	4.66	4.67	2	2.67	4.17	4.17	0.36	0.33	0.55	0.83	1.69	0.33	0.53
	c110267f1p04789	-5.76	5.84e-06	0.000493	0.9	5.78	6.58	3.83	6.78	7.12	6.45	1.1	0.34	1.1	0.52	1.71	0.73	1
	c110271f1p24189	-7.76	4.79e-06	0.000778	1.25	3.02	4.37	7.26	5.02	4.38	3.25	0.24	0.4	0.34	0.66	1.22	0.19	0.62
	c110274f1p65192	-4.66	7.89e-06	0.00112	1.03	9.65	6.28	8.03	12.28	8.64	7.23	0.76	0.5	1.29	1.45	2.53	0.69	4.18
	c11027f1p01037	-6.32	5.94e-05	0.00579	9.49	57.4	80.81	46.43	59.75	101.66	15.43	5.01	2.16	7.68	5.03	17.24	7.06	14.54
	c11028f1p0455	-6.66	5.68e-06	0.00202	0.2	4.57	5.08	9.37	4.99	4.85	5.5	0.64	0.49	0.33	0.65	0.73	1.1	1.24
	c110290f1p14805	-5.72	1.43e-05	0.00113	1.6	9.89	20.46	11.27	21.79	13.89	12.69	1.77	0.58	1.51	1.53	5.27	1.68	3.68
	c1102f10p21065	-5.8	2.63e-05	0.000274	2.76	23.75	38.45	23.61	33.24	21.75	24.39	2.67	1.05	4.26	2.51	9.23	2.18	7.04
	c110302f1p04263	-4.63	1.17e-05	0.00031	2.72	16.1	8.15	9.08	14.48	13.21	14.66	1.37	1.05	2.95	2.29	4.67	1.71	2.9
	c110305f1p04321	-3.97	4.07e-06	0.00969	1.38	4.53	5.11	4.7	5.95	3.39	4.45	0.61	0.79	1.26	1.23	1.39	0.5	1.66
	c110326f1p04724	-6.94	3.57e-06	0.00502	0.46	4.08	4.17	2.94	4.46	3.73	2.14	0.24	0.33	0.5	0.59	0.59	0.42	0.5
	c110337f1p04789	-5.97	5.47e-06	0.000657	1.11	5.54	6.15	3.7	5.71	5.74	6.71	0.43	0.44	0.6	1.04	1.49	0.51	1.29
	c110356f1p04621	-4.12	5.03e-06	0.0033	1.27	6.26	4.71	4.82	7.33	6.23	5.2	0.69	0.41	1.28	1.17	2.07	0.77	2.3
	c110377f1p02062	-3.73	6.32e-06	0.00124	1.12	7.66	7.18	6.22	9.35	6.31	7.98	1.15	0.51	1.58	1.4	3.78	0.97	2.9
	c11037f1p0942	-9.21	1.12e-05	0.000386	1.65	8.07	17.41	6.3	12.27	8.47	10.44	0.35	0.12	0.8	0.47	2.98	0.66	1.63
	c11038f4p01181	-4.99	4.89e-06	0.00212	0.54	4.99	5.01	5.96	5.87	5.61	4.71	0.43	0.28	0.64	0.57	2.38	0.77	1.48
	c110413f1p05218	-5.61	5.36e-06	0.000875	1.41	4.3	6.97	4.09	5.97	4.26	7.5	0.53	0.39	1.23	0.56	1.51	0.52	1.41
	c110415f1p04586	-6.66	3.05e-06	0.01	0.33	2.26	3.32	2.02	4.38	3.72	2.89	0.31	0.15	0.32	0.16	0.49	0.32	1.08
	c110416f1p05027	-8.23	1.38e-05	0.00251	0.24	12.03	9.67	8.06	22.55	14.12	14.88	1.21	0.33	0.77	1.17	5.28	0.49	0.66
	c110425f1p04283	2.23	-2.75e-05	0.000186	28.05	7.48	6.69	13.84	4.71	10.89	12.57	25.97	29.74	27.06	27.41	21.16	28.66	27.71
	c11042f1p0718	-5.11	5.44e-06	0.00652	0.26	4.11	5.83	3.77	9.66	6.34	5.42	0.23	0.47	0.42	0.62	2.19	0.69	2.29
	c110438f1p93682	-4	5.18e-05	0.00018	9.65	60.77	66.14	60.55	48.98	63.55	63.47	6.88	5.56	14.46	11.68	26.75	5.89	22.18
	c110450f1p14996	4.37	-0.000304	3.23e-05	224.52	31.32	4.72	33.04	1.13	38.88	32.24	277.5	269.86	216.48	238.15	170.99	243.07	184.19
	c110455f1p04848	-6.15	4.81e-06	0.0018	0.95	5.23	4.29	3.3	8.15	4.25	3.42	0.55	0.25	0.72	0.55	1.3	0.46	0.97
	c110463f1p04605	3.78	-0.0046	2.73e-05	3704.6	555.51	117.04	661.05	45.73	906.05	674.93	3938.6	3886.68	3523.37	3726.12	3184.18	3869.48	3091.49
	c11046f1p01651	-5.61	6.03e-06	0.00226	1.22	4.2	8.57	3.16	8.32	7.86	4.97	0.56	0.54	0.64	0.32	3.21	0.48	1.09
	c110548f1p13814	-6.63	7.5e-06	0.00254	1.2	5.79	6.37	6.18	13.92	6.49	5.88	0.49	0.35	0.97	0.37	1.84	0.62	2.28
	c110550f1p24940	-5.49	0.000155	9.35e-05	23.91	198.68	170.22	130.15	122.35	168.67	189.37	11.52	8.18	36.22	16.6	52.24	10.09	47.98
	c11056f13p2866	-6	4.32e-05	0.000121	6.9	55.66	42.17	36.72	63.04	33.63	36.44	3.29	2.2	9.18	9.63	6.21	5.14	10.15
	c110586f1p04844	-6.77	3.77e-06	0.00506	0.42	2.48	6.66	4.1	3.29	2.31	3.45	0.35	0.19	0.3	0.18	1.42	0.21	0.71
	c110597f1p02466	-4.12	3.76e-06	0.01	3.27	4.59	0.63	4.67	6.84	2.82	3.26	0.38	0.34	0.33	1.78	1.54	0.51	1.45
	c110604f1p12609	-5.05	6.49e-06	0.000818	0.67	4.37	8.65	7.18	7.84	6.06	7.48	1.18	0.47	1.5	0.57	1.77	0.81	2.06
	c110610f1p04571	-5.52	8.23e-06	0.00175	2.15	10.96	5.62	6.7	13.65	4.8	8.82	0.6	0.42	0.73	0.9	4.02	1.06	1.83
	c110616f1p14257	-6.58	5.96e-06	0.00327	1.06	2.77	7.66	4	9.95	4.8	6.11	0.49	0.29	0.53	0.3	1.61	0.5	1.8
	c110617f1p04802	-6.86	2.87e-06	0.01	0.54	2.16	4.77	1.96	3.33	1.78	3.18	0.15	0.21	0.27	0.26	0.83	0.3	0.57
	c110624f1p04436	-6.37	4.02e-05	7.45e-05	5.66	38.8	26.87	37.13	48.93	51.3	41.48	2.78	2.73	7.08	5.15	9.04	3.43	9.08
	c11064f1p1965	-4.93	2.37e-05	0.00205	7.33	31.95	18.83	14.64	42.81	21.86	20.29	1.82	0	6.12	2.47	11.64	3.1	6.86
	c110661f1p14805	3.26	-0.00143	4.98e-05	1179.47	216.39	54.46	424.19	29.31	332.03	289.14	1130.1	1167.34	1133.86	1052.02	953.17	1554.27	1233.14
	c110674f1p04565	-5.6	1e-05	8.83e-05	1.71	8.3	9.71	8.41	11.33	13.18	10.78	1.32	0.8	1.07	1.38	3.07	0.88	2.79
	c110684f1p14774	-4.92	6.14e-06	0.000578	1.46	6.98	6.44	5.92	6.97	5.44	7.94	0.92	0.7	1.18	1.07	2.6	0.56	1.32
	c110690f1p14413	-5.81	4.13e-06	0.00353	0.73	4.48	4.37	3.15	6.84	2.83	4.14	0.44	0.1	0.67	0.71	1.17	0.67	0.8
	c110707f1p04547	-4	6.64e-05	0.00123	21.23	56.24	88.69	79.4	104.09	73.35	53.93	6.67	6.08	14.29	14.64	54.15	4.85	18.7
	c110710f1p24700	-5.12	8.72e-06	0.000109	1.27	9.7	10.22	7.85	9.6	7.6	10.23	0.92	1.12	1.29	1.08	3.38	1.05	2.2
	c110713f1p24775	-7.27	5.35e-06	0.00097	0.4	3.34	7.16	3.26	6.52	5.43	5.7	0.5	0.05	0.57	0.22	0.68	0.88	1.48
	c110747f1p22634	-6.26	3.08e-05	0.00011	6.59	23.86	47.44	22.21	29.68	34.27	28.3	2.37	2.29	4.39	3.61	10.38	1.89	5.81
	c110750f1p05260	-5.74	3.7e-06	0.00602	0.39	5.16	3.54	2.46	2.92	4.86	4.41	0.17	0.46	0.6	0.87	0.79	0.49	0.75
	c110755f1p24860	-6.23	7.58e-06	0.000834	0.88	6.89	7.92	5.07	12	7.83	6.32	0.53	0.83	1.5	1.02	1.61	0.68	1.36
	c110799f1p04605	-5.08	6.79e-06	0.000273	1.08	8.27	7.04	6.9	8.51	6.79	6.6	0.73	0.83	1.19	1.09	2.11	0.79	2.15
	c110808f1p04532	-6.39	3.61e-06	0.00695	0.45	1.41	3.88	4.61	4.45	5.36	1.87	0.3	0.4	0.25	0.21	1.13	0.37	0.79
	c110813f1p14868	-5	3.67e-06	0.00822	0.87	3.45	3.91	3.79	4.63	3.34	4.42	0.52	0.14	0.61	0.69	1.9	0.35	0.68
	c110829f1p14487	-4.45	6.15e-06	0.00256	0.75	5.42	8.55	7.03	5.85	5.36	8.85	0.61	0.5	1.53	0.55	4.39	0.48	1.35
	c110852f1p14520	-8.75	3.35e-06	0.00472	0.2	2.02	3.29	4.41	4.59	3.24	2.04	0.34	0.1	0.02	0.21	0.74	0.78	0.07
	c110853f1p04626	-6.1	1.29e-05	0.000475	2.09	12.44	14.08	14.36	18.44	13.82	5.82	0.77	0.34	1.69	1.86	4.68	1.05	2.9
	c110859f1p03844	-4.66	1.02e-05	0.000162	2.26	8.26	13.86	9.84	12.04	8.89	12.92	0.87	0.64	2.06	1.66	4.22	1.78	3.38
	c110860f1p05049	-4.35	4.5e-06	0.00465	1.01	3.43	4.06	6.55	4.86	5.85	5.53	0.33	0.53	0.43	1.37	2.33	0.66	1.55
	c110862f1p04608	-5.37	6.53e-06	0.000564	1.04	6.31	5.01	5.12	9.62	7.03	7.56	0.85	0.63	1.9	1.16	1.43	0.57	1.2
	c11086f7p1917	-4.66	3.98e-05	0.000364	9.11	29.84	45.28	45.91	61.67	32.18	46.04	3.24	3.42	6.76	5.11	20.45	6.38	12.54
	c11088f2p31225	-8.61	1.5e-05	0.00368	1.2	9.06	27.57	15.96	12.14	8.23	14.19	0.27	0.46	1.55	2.25	3.24	0.64	1.85
	c110918f1p04547	-4.87	8.92e-06	0.00453	1.55	9.21	11.5	8.02	16.55	7.57	5.16	1.11	0.59	1.3	1.14	3.67	1.97	2.46
	c110920f1p012171	-4.92	3.27e-06	0.01	0.81	3.59	3.96	3.44	4.23	2.81	3.09	0.48	0.3	0.59	0.35	1.58	0.45	0.71
	c110939f1p14353	-5.7	4.92e-06	0.0024	1.01	3.51	8.32	3.19	4.4	5.39	5.11	0.38	0.15	0.4	0.02	2.66	0.4	1.42
	c110941f1p04681	-5.43	3.37e-06	0.00993	0.69	3.33	4.61	3.97	3.18	2.95	3.21	0.52	0.29	0.52	0.4	1.12	0.2	0.99
	c11094f1p01327	-9.64	1.26e-05	0.01	1.52	21.69	14.47	5.76	10.45	2.18	17.39	0.92	1.86	0.74	0.39	0.62	1.66	1.43
	c110951f1p04824	-4.63	3.97e-06	0.00693	1.06	4	3.73	3.38	5.97	4.92	3.96	0.49	0.18	1.09	0.33	2.07	0.53	1.15
	c110954f1p04188	-5.16	4.22e-06	0.00418	0.83	3.97	6.89	4.42	3.37	3.56	4.94	0.51	0.37	0.85	0.94	1.11	0.66	0.98
	c110958f1p04513	-7.91	2.8e-06	0.01	0.34	4.06	1.11	1.42	2.95	2.84	4.01	0.37	0.1	0.17	0.05	0.8	0.19	0.45
	c110964f1p04526	-5.01	4.39e-06	0.01	0.04	4.39	7.38	6.42	4.89	2.65	3	0.9	0.05	0.87	0.08	2.13	0.6	1.1
	c110997f1p13951	-6.36	5.79e-06	0.00135	1.79	8.94	3.36	3.49	6.09	3.94	7.87	0.73	0.62	0.84	0.11	1.84	0.77	0.66
	c110998f1p13454	-5.48	6.72e-06	0.000221	1.3	5.67	7.19	8.58	7.67	5.75	7.45	0.93	0.52	1.16	0.73	2.27	0.76	1.58
	c11099f8p2899	-6.11	7.39e-06	0.00143	2.56	6.75	5.46	12.64	5.33	8.14	4.79	0.47	0	0.51	1.33	4.23	0.37	0.57
	c111017f1p04997	-6.19	3.45e-06	0.00696	0.91	2.11	4.35	3.33	4.97	2.96	2.99	0.33	0.09	0.42	0.45	1.11	0.35	0.74
	c111021f1p04651	-5.76	1.82e-05	2.51e-05	4.38	23.08	16.76	15.51	21.2	13.27	20.68	1.98	1.36	2.67	2.61	4.96	2.06	4.31
	c111024f1p04792	-5.3	6.79e-06	0.000393	1.15	5.49	7.82	6.59	7.65	8.14	7.71	0.86	0.47	0.62	0.57	4.12	0.7	1.06
	c111036f1p14588	-6.36	3.88e-06	0.00391	0.67	2.13	5.07	4.32	5.42	2.76	3.99	0.52	0.27	0.76	0.34	0.8	0.34	0.79
	c11104f1p11250	-4.94	4.07e-06	0.01	1.25	1.66	3	4.98	6.35	7.07	2.34	0.54	0.54	0.48	0.83	1.79	0.4	0.82
	c11106f3p0654	-5.11	4.78e-05	9.21e-05	11.24	46.93	54.73	47.79	72.87	37.78	43.79	4.16	1.2	9.15	5.12	16.19	7.37	18.47
	c111089f1p04860	-5.7	5.26e-06	0.00624	0.93	7.06	7.21	2.46	3.06	8.18	4.17	0.21	0.14	1.28	0.24	2.14	0.12	1.67
	c111098f1p04941	-7.25	7.14e-06	0.00011	0.56	8.56	5.55	5.81	6.97	7.88	7.06	0.81	0.2	0.89	0.09	1.91	0.41	1.53
	c111113f1p03909	-4.92	4.41e-06	0.00376	0.73	5.23	4.47	4.05	5.64	5.01	4.41	0.65	0.17	0.46	0.48	2.29	0.65	1.3
	c111125f1p04551	-7.69	4.75e-06	0.00256	0.58	3.03	2.16	4.39	4.52	6.08	7.23	0.65	0.1	0.14	0.52	1.26	0.61	0.36
	c111130f1p04325	-4.51	1.27e-05	0.00806	4.63	4.72	23.29	9.04	18.54	13.83	12.93	0.97	0.7	1.75	2.25	8.94	2.24	2.47
	c111156f1p04386	-5.43	5.04e-06	0.0014	1.26	5.93	4.64	4.32	6.44	4.56	5.58	0.58	0.71	0.59	0.58	2.09	0.52	0.95
	c111159f1p04393	-78.73	2.04e-06	0.01	0.25	3.83	1.99	1.42	0.94	1.28	0.88	0.00945	0.03	0.02	0.03	0.02	0.02	0.01
	c11115f1p01409	-9.89	5.56e-06	0.000948	0.85	2.33	7.35	4.41	7.58	3.42	5.61	0.33	0.08	0.43	0.53	1.05	0.26	0.51
	c111161f1p04540	-5.21	3.36e-06	0.01	0.79	1.45	5.57	2.35	3.82	3.91	4.18	0.21	0.15	0.42	0.29	1.09	0.47	1.6
	c111167f1p01789	-8.59	7.01e-06	0.01	1.64	1.16	3.87	5.1	11.55	11.26	6.06	0.21	0.19	1.4	0.71	1.85	0.33	0.06
	c111172f1p14394	-10.65	5.55e-06	0.000159	1.42	3.78	4.72	3.82	5.24	4.95	7.6	0.18	0.23	0.55	0.24	0.77	0.33	0.66
	c111191f1p14757	-4.65	6.14e-06	0.00235	1.62	6.37	9.12	4.9	9.56	3.39	6.13	0.91	0.71	1.53	0.72	2.73	0.72	1.53
	c111193f1p13977	-5.1	2e-05	0.000652	2.88	17.06	15.94	26.14	23.99	29.52	16.5	2.23	1.29	5.21	2.67	8.04	2.96	3.49
	c111205f1p04544	-4.9	1.64e-05	0.00262	3.38	25.64	11.43	10.54	26.17	17.74	14.44	1.18	0.76	3.2	2.24	5.26	2.27	7.39
	c111207f1p04592	-5.33	3.85e-06	0.00591	0.7	2.87	5.62	3.22	4.63	3.63	4.59	0.6	0.29	0.48	0.6	1.4	0.45	0.92
	c111210f1p14423	-5.01	3.2e-06	0.01	0.54	3.25	3.91	2.69	4.99	3.53	2.51	0.39	0.03	0.46	0.76	1.05	0.78	0.81
	c11122f2p2751	-4.77	7.88e-06	0.000402	1.83	9.22	7.68	9.81	10.56	7.16	5.92	0	1.04	1.61	1.58	4.73	1.82	0.14
	c111254f1p04292	-6.57	1.33e-05	2.69e-05	2.01	14.26	12.81	11.74	16.46	11.99	12.14	0.82	0.49	1.76	2.23	3.8	0.63	2.66
	c111260f1p04498	-5.76	6.47e-06	0.000472	1.09	6.58	9.59	4.16	6.04	5.86	7.23	0.62	0.51	0.59	1.04	2.64	0.56	1.08
	c111277f1p04613	-4.06	4.88e-06	0.00399	1.28	3.53	5.54	5.03	7.98	5.03	6.57	0.6	0.27	1.56	1.03	1.86	0.65	2.64
	c111286f1p04675	-6.95	3.14e-06	0.00858	0.32	2.16	2.76	3.16	3.96	3.27	3.58	0.15	0.19	0.16	0.4	0.93	0.22	0.73
	c111287f1p04702	-6.5	3.38e-06	0.0072	0.34	3.42	4.35	3.74	3.14	2.09	4.04	0.33	0.16	0.31	0.45	0.64	0.45	0.91
	c111289f1p04169	-5.15	3.4e-06	0.01	0.84	3.21	4.82	2.86	4.64	2.49	3.61	0.32	0.24	0.56	0.38	1.83	0.36	0.67
	c111292f1p05004	-8.68	5.13e-06	0.00118	0.84	5.32	4.26	2.12	6.51	7.21	3.27	0.26	0.22	0.25	0.47	1.23	0.16	0.8
	c111295f1p04412	-5.71	4.5e-06	0.00231	1.01	3.69	5.68	3.74	6.12	4.6	4.01	0.6	0.28	0.49	0.48	1.68	0.54	0.98
	c111296f1p04984	-12.25	4.49e-06	0.000657	0.72	1.94	3.62	5.52	5.15	5.52	2.21	0.09	0.04	0.36	0.19	0.54	0.51	0.29
	c11130f1p01427	-5.21	2.55e-05	0.00103	3.53	30.17	23.8	17.49	43.26	23.05	26.72	2.9	1.17	5.29	3.8	9.54	2.56	7
	c111325f1p04269	-6.3	3.48e-06	0.00669	0.21	3.97	4.83	1.98	4.33	4.55	2.08	0.48	0.24	0.37	0.02	0.33	0.37	1.68
	c111329f1p14403	-6.17	4.27e-06	0.00626	0.99	5.62	3.04	1.44	6.85	5.42	3.01	0.67	0.19	0.28	0.75	1.19	0.25	0.94
	c11133f1p0638	-7.01	3.24e-06	0.00714	1.01	2.99	1.58	2.01	3.75	2.6	5.67	0.26	0.35	0.47	0.35	0.65	0.07	0.64
	c111388f1p04369	-4.99	4.58e-06	0.00973	1	3.4	9.2	3.3	3.44	4.56	5.03	0.75	0.28	0.55	0.29	2.64	0.45	1.03
	c111402f1p04698	-6.56	2.8e-06	0.01	0.22	2.25	4.27	2.59	3.36	2.29	2.55	0.3	0.14	0.32	0.35	1.04	0.19	0.33
	c111417f1p04808	-5.79	3.93e-06	0.00857	0.28	2.59	5.21	2.01	3.7	4.22	6.61	0.58	0.25	0.65	0.2	1.85	0.15	0.57
	c11141f1p2873	-4.31	4.65e-06	0.00694	0.95	2.77	7.92	5.64	3.31	4.89	6.36	0.19	0.26	1.21	1.28	2.36	0.62	1.47
	c111428f1p21851	-5.16	1.11e-05	0.00221	2.38	8.99	9.9	8.44	20.84	12.23	9.69	1.04	0.85	2.09	2.37	3.44	1.03	3.22
	c111467f1p04444	-4.61	5.37e-06	0.00428	0.47	8.6	6.65	4.22	4.48	4.6	7.15	1.09	0.6	1.13	1.07	1.92	1.11	0.93
	c11146f1p31355	-4.36	4.14e-06	0.00756	1.02	5.63	0.96	4.94	5.49	4.89	5.23	0.9	0.25	0.61	0.44	2.75	0.67	0.83
	c111487f1p04864	-4.77	3.44e-06	0.01	0.86	5.84	2.87	1.93	4.58	2.91	4.34	0.47	0.45	0.77	0.41	1.64	0.5	0.66
	c11148f1p01267	-7.36	4.74e-06	0.00224	0.29	5.88	6.72	4.86	2.79	5.12	2.52	0.36	0.27	0.78	0.06	0.85	0.62	0.89
	c1114f2p01742	-4.93	1.01e-05	0.01	1.74	17.04	15.84	6.84	15.07	8.33	3.2	1.47	0.13	1.78	1.03	5.09	1.34	2.98
	c111515f1p04571	-5.56	2.04e-05	2.83e-05	3.55	19.39	26.1	22.66	18.5	20.29	20.43	2.32	1.09	4.31	2.47	7.15	1.76	4.45
	c111519f1p05039	-5.23	3.94e-06	0.00543	0.95	2.92	4.81	2.58	4.45	4.03	6.1	0.65	0.27	0.74	0.55	1.72	0.31	0.71
	c11154f1p01883	-5.67	2.03e-05	0.00213	3.17	18.66	10.79	26.55	31.75	26.28	12.68	2.2	0.83	3.94	5.65	3.6	1.81	4.91
	c111570f1p04342	-3.75	0.00022	0.000578	46.28	270.39	306.53	280.85	247.94	315.25	171.25	31.39	23.3	54.9	87.26	96.19	32.96	110.67
	c111575f1p24648	-6.6	5.2e-06	0.00151	0.99	4.5	2.91	4.91	8.77	4.89	4.53	0.41	0.1	0.88	0.73	1.42	0.34	0.89
	c11157f1p0959	-4.91	7.81e-06	0.00707	1.25	13.74	10.84	8.47	4.08	4.75	8.99	0.96	0.47	1.11	0.93	4.23	1.04	1.88
	c111595f1p04950	-5.79	8.04e-06	0.000201	1.01	6.33	9.93	8.44	9.88	6.14	8.62	0.83	0.45	1.09	0.86	2.7	0.75	2.01
	c111599f1p04379	-7.56	4.66e-06	0.004	0.58	4.9	8.45	2.9	3.65	3.46	3.64	0.27	0.25	0.34	0.2	1.35	0.29	0.94
	c1115f5p21551	-8.5	3.61e-06	0.0055	0.41	1.9	3.81	5.19	5.44	1.78	2.33	0.03	0	0.29	0.24	0.64	0.29	0.96
	c111622f1p05053	-5.9	1.54e-05	3.47e-05	4.09	16.98	14.54	15.52	20.99	13.63	10.72	1.35	0.88	1.72	1.43	6.66	1.7	2.62
	c111632f1p04830	-4.77	1.38e-05	5.83e-05	3.86	17.13	10.76	10.75	16.61	16.64	16.07	1.36	1	2.81	1.91	5.89	2.22	4.07
	c111633f1p04570	-4.34	4.1e-06	0.00734	0.67	3.35	5.35	4.55	5.06	5.27	4.45	0.53	0.32	1.23	0.59	1.74	0.46	1.74
	c111647f1p02434	-5.44	6.2e-06	0.000379	1.85	4.13	6.64	5.75	7.46	5.5	8.74	0.96	0.64	0.78	0.58	2.89	0.38	1.14
	c111648f2p04172	-5.39	1.5e-05	6.73e-05	3.37	20.88	14.52	18.81	11.74	13.42	13.62	1.43	1.93	2.87	0.94	4.75	2.68	3.27
	c111651f1p14723	-5.97	3.14e-06	0.01	0.46	3.6	4.54	1.05	4.18	3.01	3.15	0.03	0.07	0.76	0.45	0.66	0.38	0.99
	c111654f1p24879	-7.44	3.57e-06	0.00436	0.45	2.63	5.08	3.5	3.77	2.77	3.42	0.12	0.09	0.11	0.2	1.42	0.19	0.78
	c111666f1p04376	-6.51	6.59e-06	0.00761	0.36	7.05	9.99	2.26	9.9	4.16	7.05	0.73	0.51	1.47	0.88	0.81	0.46	1.4
	c111668f1p05152	-4.8	4.27e-06	0.00465	0.97	5.1	5.05	3.5	5.19	4.39	4.59	0.57	0.09	0.77	0.49	2.4	0.66	1.02
	c11166f7p61493	-5.26	8.33e-05	1.06e-05	21.8	76.67	98.83	78.5	101.74	87.51	78.28	8.25	6.36	14.01	13.58	33.98	7	20.05
	c11167f1p2932	-4.51	1.18e-05	0.00633	3.16	4.46	16.88	21.27	10.69	9.78	14.62	2.07	1.8	3.01	5.19	2.13	1.34	2.37
	c111681f1p14568	-5.63	1.47e-05	0.00021	2.93	7.65	19.44	16.22	17.98	15.25	14.27	2.09	1.17	1.55	1.28	6.12	1.06	3.36
	c111695f1p04707	-5.94	5.23e-06	0.00107	0.9	5.41	3.99	4.44	3.7	8.33	5.58	0.38	0.29	0.9	0.28	1.49	0.41	1.68
	c11169f1p21089	-4.67	1.93e-05	0.00011	3.63	18.63	22.13	22.68	26.17	15.72	21.57	1.88	2.06	2.99	4.1	8.35	1.98	6.56
	c1116f9p2872	-4.5	1.03e-05	0.0038	1.48	4.77	12.41	15.05	10.27	11.08	15.46	1.44	0.26	2.43	2.99	3.41	0.43	4.72
	c111714f1p04459	-6.01	5.42e-06	0.00108	0.68	5.59	4.27	6.09	5.25	3.52	8.25	0.42	0.63	0.92	1.15	1.2	0.86	0.43
	c11172f13p31199	-4.76	3.72e-06	0.00869	0.69	3.18	4.69	4	2.73	4.6	5.21	0.28	0.19	1.51	0.81	2.13	0.14	0.21
	c111735f1p14762	-5.07	5.81e-06	0.000738	1.33	7.16	6.96	4.13	5.39	6.33	7.17	0.68	0.59	0.62	1.03	2.46	0.54	1.67
	c11173f4p0847	-7.3	4.33e-06	0.00173	0.43	5.94	4.43	4.39	5.06	3.26	2.95	0.54	0.53	0	0.53	1.37	0.29	0.36
	c111743f1p04921	-6.06	7.98e-06	0.00188	1.22	10.81	9.18	5.43	10.51	9.51	3.15	1.06	0.35	0.24	0.92	3.23	0.71	1.72
	c111752f1p14949	-5.65	4.26e-06	0.00327	0.6	5.12	5.2	4.04	5.24	3.34	4.05	0.59	0.48	0.63	0.79	1.08	0.38	0.93
	c11175f1p01076	-7.97	3.36e-06	0.0052	0.43	2.9	2.41	3.77	4.1	2.31	4.13	0.19	0.1	0.35	0.48	0.38	0.23	0.76
	c111765f1p14596	-6.82	3.38e-06	0.00653	0.6	2.75	3.85	2.69	4.08	2.7	4.13	0.43	0.1	0.28	0.34	0.97	0.32	0.61
	c111773f1p11886	-5.38	4.26e-06	0.00568	1.17	4.5	7.57	3.01	4.81	1.68	4.42	0.6	0.24	0.2	0.28	2.37	0.53	0.84
	c111787f1p14513	-6.62	3.6e-06	0.00504	0.8	3.84	3.48	2.5	4.25	3.15	4.23	0.25	0.1	0.76	0.11	0.86	0.36	0.92
	c11179f4p1942	-7.78	1e-05	0.000125	2.05	10.12	6.44	8.04	13.65	12.02	6.64	0.89	0.36	0.08	1.34	1.84	0.66	2.4
	c1117f8p21265	-4.14	1.02e-05	0.000142	3.56	11.64	8.78	10.96	16.23	9.16	10.65	1.19	0.27	2.15	2.41	3.66	2.82	4.63
	c111812f1p14658	-5.76	5.64e-06	0.000597	1.15	4.71	7.35	5.35	5.37	7.11	4.92	0.35	0.19	1.09	0.74	1.86	0.71	1.3
	c111817f1p04254	-4.69	3.5e-06	0.01	1.01	4.55	2.07	2.73	4.83	4.66	3.8	0.39	0.26	0.64	0.46	1.19	0.78	1.34
	c111826f1p11839	-4.96	6.83e-06	0.00126	1.49	6.73	11.2	7.18	7.06	3.94	7.34	0.97	0.42	1.18	0.32	3.65	0.6	1.91
	c111834f1p04981	-4.82	3.56e-06	0.01	0.66	3.87	3.83	3.27	4.73	3.85	3.8	0.41	0.34	0.36	0.79	1.48	0.44	1.16
	c111835f1p05066	-6.22	3.8e-05	0.000943	2.74	32.22	52.22	52.95	35.4	42.43	21.23	3.93	0.66	5.52	5.09	10.38	2.78	10.12
	c111842f1p04168	-5.44	6.92e-05	2.19e-05	13.29	61.51	81.14	69.23	67.24	84.89	70.32	6.82	6.18	7.3	11.32	23.1	7.81	19.75
	c111844f1p14522	-6.26	2.96e-06	0.01	0.81	1.38	4.31	2.68	2.93	4.7	1.6	0.44	0.15	0.05	0.31	0.44	0.4	1.15
	c111847f1p04474	-6.94	3.8e-06	0.00364	0.74	2.29	4.74	3.49	5.6	2.56	3.83	0.12	0.08	0.26	0.34	1.3	0.25	1
	c111855f1p04312	-12.16	3.63e-06	0.00662	0.58	6.27	2.21	2.35	4.88	1.47	2.35	0.3	0.1	0.07	0.05	0.44	0.42	0.26
	c11187f6p2759	-5.25	8.13e-05	0.00753	6.63	71.35	147.74	43.18	63.12	85.57	118.43	11.58	2.94	13.9	8.68	27.53	5.94	31.46
	c111883f1p05008	-5.49	5.47e-06	0.000832	1.04	3.96	5.53	4.87	8.23	6.47	5.3	0.51	0.24	0.96	0.78	2.12	0.57	1.26
	c111886f1p04644	-5.28	1.2e-05	4.87e-05	2.55	12.87	15.37	8.65	12.64	13.4	12.09	1.15	1.33	1.97	3	4	1.13	2.12
	c111894f1p04434	-6.3	2.9e-06	0.01	0.68	4.29	2.21	3.53	0.4	3.63	3.31	0.38	0.03	0.19	0.08	1.04	0.56	0.59
	c111897f1p04795	-6.1	5.14e-06	0.00091	0.86	5.7	4.54	4.06	6.25	5.29	5.73	0.36	0.54	0.9	0.6	1.81	0.43	0.67
	c1118f3p3750	-6.04	2.94e-06	0.01	0.37	2.77	1.73	3.34	4.37	3.31	2.78	0.5	0.6	0.4	0.6	0.55	0.17	0.27
	c11191f1p01131	-5.13	9.53e-06	0.000167	2.19	9.81	10.21	6.22	10.37	9.64	13.52	0.89	0.3	1.47	1.05	4.02	1.07	3.27
	c111925f1p05106	-7.4	2.7e-06	0.01	0.86	2.41	1.19	2.82	2	2.97	3.89	0.08	0.11	0.28	0.13	0.91	0.36	0.31
	c11192f1p31675	-6.38	3.57e-06	0.00568	0.16	5.17	1.29	4.23	3.31	4.52	3.07	0.42	0.2	0.86	0.27	0.84	0.15	0.67
	c111938f1p04407	-4.9	1.3e-05	2.16e-05	3.41	14.54	13.18	10.92	15.56	12.57	15.3	1.7	1.11	2.72	1.68	5.53	1.78	2.89
	c111961f1p04967	-5.85	4.09e-06	0.00365	0.66	4.94	2.77	3.13	6.79	3.22	4.62	0.36	0.44	0.55	0.84	1.2	0.3	0.78
	c111967f1p34827	-6.37	0.00037	9.22e-05	60.1	353.11	422	320.53	383.45	515.69	250.81	24.34	15.96	66.6	41.31	105.38	21.52	86.62
	c111969f1p14414	-6.87	6.1e-06	0.00185	0.69	7.26	7.32	5.8	7.3	6.97	1.6	0.71	0.91	0.77	0.54	1.46	0.43	0.55
	c111970f1p05071	-6.4	3.42e-05	0.000694	6.17	27.09	33.77	20.35	26.38	44.65	53.61	3.39	2.21	6.29	4.39	6.35	3.06	7.42
	c111975f1p04543	-4.96	8.85e-06	0.0014	1.98	5.9	13.93	9.62	8.63	6.18	12.23	0.77	0.69	1.18	1	4.48	0.98	2.67
	c111981f1p14588	-6	4.84e-06	0.00368	1.15	8.04	2.08	3.23	5.65	5.83	3.98	0.23	0.17	0.88	0.34	1.63	0.24	1.51
	c111990f1p94719	-3.81	2.97e-05	0.00143	4.77	25.44	33.62	37.75	36.12	36.56	43.5	2.63	1.68	9.36	10.12	12.49	2.51	18.42
	c111993f1p04785	-5.4	1.11e-05	5.55e-05	2.15	10.92	13.49	9.14	14.33	10.8	10.41	1.42	0.89	2.1	1.16	4.31	1.3	2
	c111f10p3849	-5.39	3.57e-05	0.00119	8.97	43.19	27.31	27.51	63.56	24.01	37.9	2.95	1.32	9.97	9.71	12.64	3.37	3.2
	c112002f1p04873	-5.74	9.87e-06	6.44e-05	1.32	10.52	11.27	10.86	9.87	7.58	10.6	1.07	0.14	1.49	0.89	3.75	1.35	2.13
	c112006f1p04697	-5.95	8.57e-06	9.06e-05	1.54	7.52	10.8	5.75	8.68	9.42	9.55	1.3	0.52	1	1.04	2.78	0.64	1.67
	c112008f1p33550	-5.2	3.7e-05	1.5e-05	8.96	38.77	39.47	30.88	45.55	41.67	36.84	3.44	2.81	7.08	5.98	13.67	4.52	9.09
	c11200f1p0787	-15.25	8.01e-06	0.00148	0.8	11.23	7.01	6.32	8.95	1.2	8.31	0.16	0	0.38	0.83	0.62	0.31	0.58
	c112015f1p02429	-6.27	6.89e-06	0.000325	1.06	4.85	7.77	6.12	9.79	5.22	7.43	0.72	0.09	0.84	0.37	2.45	0.8	1.46
	c112040f1p11120	-5.45	1.77e-05	0.000379	3.45	23.73	16.27	18.82	16.35	10.87	24.62	2.66	0.9	1.76	1.07	7.69	1.49	5.38
	c112050f1p04447	-4.8	3.53e-06	0.01	0.85	4.33	4.45	4.56	4.15	2.33	3.19	0.3	0.4	0.6	0.72	1.42	0.39	1.13
	c11205f1p01022	-4.52	5.93e-06	0.000969	1.17	7.48	6.65	7.36	7.29	5.82	5.18	0.82	0.33	1.56	1.09	3.65	0.45	1.16
	c112066f1p05224	4.1	-0.00479	6.03e-05	3789.06	443.9	110.92	572.17	38.7	757.92	554.29	4082.04	4506.16	3545.12	3873.78	2859.08	3998.01	2814.45
	c112071f1p24770	-5.43	7.23e-06	0.00429	1.13	6.08	6.36	6.44	13.35	4.44	8.65	0.61	0.42	1.58	0.79	2.19	1.05	1.91
	c112073f1p05077	-4.56	4.09e-06	0.00653	0.96	3.91	7.36	4.21	3.56	4.01	4.17	0.61	0.37	0.73	0.86	1.88	0.43	1.29
	c112084f1p03734	-4.79	0.000141	0.000254	27.03	101.01	131.09	206.84	168.54	180.21	137.43	12.89	12.53	30.37	23.39	43.83	25.22	50.56
	c112094f1p23634	-8.36	9.46e-06	0.000894	1.24	5.91	15.56	7.39	10.19	6.15	9.06	0.64	0.4	1.02	0.72	2.39	0.17	1.3
	c112102f1p04847	-6.01	1.55e-05	0.00058	2.98	11.58	22.02	10.17	22.49	17.04	11.38	1.68	0.88	1.69	1.2	5.3	1.71	3.79
	c112119f1p04767	-7.8	2.85e-06	0.01	1.04	2.8	1.36	1.91	4.07	3.39	2.3	0.25	0.16	0.32	0.25	0.52	0.24	0.43
	c11212f1p11116	-6.64	2.8e-06	0.01	0.25	3.88	3.62	2.97	3.95	2.23	0.62	0.19	0.2	0.34	0.53	0.59	0.19	0.6
	c112138f1p11711	-8.61	5.01e-06	0.0012	0.91	1.72	5.64	4.22	7.65	4.51	4.22	0.2	0.07	0.4	0.26	0.63	0.34	1.47
	c112140f1p04398	-8.77	4.35e-06	0.00874	0.5	1.65	3.91	3.7	8.06	4.8	2.54	0.2	0.43	0.87	0.19	0.6	0.28	0.3
	c112141f1p04745	-5.78	3.23e-06	0.01	0.14	4.74	4.29	2.65	3.56	2.74	2.79	0.38	0.3	0.57	0.34	1.09	0.2	0.74
	c11214f1p01702	-6.14	4.49e-06	0.0019	0.65	3.45	4.31	3.77	3.4	6.79	5.78	0.47	0.26	0.44	0.26	1.6	0.58	0.96
	c112150f1p04597	-6.43	3.82e-06	0.00418	0.46	2.22	4.33	2.76	6	3.99	4.11	0.31	0.39	0.53	0.53	0.92	0.42	0.61
	c112154f1p04383	-6.29	3.25e-06	0.00855	0.6	3.52	1.99	2.68	2.27	4.35	4.83	0.34	0.18	0.78	0.68	0.48	0.16	0.6
	c112163f1p04808	-5.45	1.21e-05	0.000519	1.87	10.7	18.84	10.29	14.2	8.29	13.73	1.53	1.07	1.7	1.44	4.19	2	2.35
	c112174f1p35022	-6	1.56e-05	1.06e-05	3.28	15.74	14.34	16.98	15.23	14.26	16.93	1.49	0.69	2.16	2.27	4.74	1.46	3.3
	c112179f1p04390	-4.74	3.96e-06	0.00671	1.07	4.34	3.19	4.02	5.26	4.21	4.62	0.43	0.28	0.76	0.61	1.98	0.68	0.9
	c11218f5p01221	-5.76	4.32e-06	0.00637	0.68	5.96	0.83	5.43	5.78	4.41	3.98	0.14	0	1.18	1.28	0.88	0.34	0.88
	c112190f1p04707	-5.35	7.8e-06	0.00173	2.05	13.82	7.24	4.32	8.48	6.05	8.15	0.69	0.52	1.01	0.85	3.71	0.95	1.64
	c1121f5p1881	-8.37	3.71e-06	0.00293	0.73	3.54	2.29	1.69	4.87	3.92	4.89	0.19	0.64	0.43	0.17	0.47	0.38	0.35
	c112201f1p04788	-5.12	4.97e-06	0.00178	1.23	4.14	7.48	4.82	5.51	5.03	4.56	0.21	0.41	0.94	0.9	2.73	0.34	0.87
	c112205f1p04470	-5.56	7.29e-06	0.000121	1.77	7.29	8.07	5.52	8.63	6.82	8.95	0.94	0.5	1.29	0.98	2.55	0.82	1.38
	c112247f1p04468	-5.52	3.02e-06	0.01	0.55	4.03	4.94	2	2.54	3.43	2.14	0.48	0.2	0.32	0.22	1.41	0.22	0.71
	c11224f2p21225	-5.15	8.54e-06	0.00803	0.22	6.92	7.05	6.34	16.12	10.12	9.28	1.02	0.36	2.9	1.27	2.22	0.71	2.39
	c112263f1p14602	-6.15	3.36e-06	0.00787	0.5	3.51	1.98	3.03	4.77	4.89	2.42	0.36	0.22	0.4	0.39	1.13	0.23	0.72
	c112267f1p14384	-8.42	3.8e-06	0.00231	0.36	4.19	3.09	4.45	4.88	4.02	0.95	0.49	0.08	0.21	0.36	0.89	0.16	0.43
	c112269f1p14527	-5.68	5.5e-06	0.000727	1.1	6.01	5.13	3.77	7.21	6.46	5.56	0.27	0.32	1.12	0.62	1.94	0.62	1.31
	c11227f1p0710	-4.55	1.7e-05	0.01	3.6	18.04	32.87	25.61	13.12	17.49	6.29	1.71	0.51	3.77	4.83	4.24	2.45	8.22
	c112281f1p04700	-5.63	4.81e-05	0.00234	6.87	38.45	53.35	88.98	41.58	46.56	34.32	6.09	3.74	5.83	6.76	17	6.22	9.43
	c112308f1p05010	-5.37	3.09e-06	0.01	0.83	4.01	3.54	3.23	3.3	2.53	2.75	0.5	0.22	0.48	0.34	1.37	0.26	0.58
	c112313f1p04669	-5.7	6e-06	0.000427	1.11	7.13	7.12	4.75	7.87	4.49	6.2	0.42	0.36	0.91	0.85	1.89	0.74	1.6
	c112339f1p04664	-6.2	6.87e-06	0.0021	1.3	5.39	8.91	8.33	5.62	2.69	10.22	0.44	0.36	0.88	0.85	2.86	0.54	0.93
	c112357f1p04303	-4.5	4.9e-06	0.00287	0.93	4.57	6.44	5.52	6.58	4.11	5.75	0.68	0.21	0.87	0.88	2.75	0.55	1.59
	c11235f1p2671	-5.95	1.12e-05	9.06e-05	1.37	11.87	13.75	9.87	10.88	9.86	12.62	1.31	0.17	0.68	1.33	5.05	1.36	1.91
	c112364f1p14654	-5.05	9.27e-06	0.000646	1.18	9.19	12.91	10.51	9.06	5.95	11.96	1.17	0.55	1.35	2.14	3.71	1.07	2.05
	c11236f1p0988	-7.34	6.96e-06	0.000619	0.65	3.85	5.1	6.7	9.55	7.39	8.14	0.63	0	1.38	0.3	2.17	0.17	0.99
	c112375f1p14846	-6.57	8.71e-06	3.09e-05	1.44	7.56	10.22	7.96	9.52	7.19	8.9	1.08	0.51	0.75	0.87	2.4	1.05	1.38
	c112382f1p05189	-6.03	9.51e-06	0.00769	0.53	4.14	16.17	12.67	8.03	6.43	12.07	1.72	0.73	1.12	1.66	3.26	0.52	0.93
	c112383f1p04917	-9.62	6.81e-06	0.000768	0.86	3.49	9.24	5.86	3.64	8.53	7.23	0.59	0.27	0.38	0.42	1.13	0.45	0.79
	c11238f1p01336	-4.7	6.35e-06	0.01	0.68	4.59	9.45	6.17	4.55	7.31	9.62	0.77	0	0.45	0.66	5.6	0.4	1.13
	c112390f1p24650	-7.74	4.13e-06	0.00185	1.09	1.56	5.17	3.49	4.49	4.65	4.18	0.2	0.19	0.85	0.43	0.94	0.22	0.35
	c112397f1p34364	-5.72	4.32e-06	0.00285	0.78	4.53	5.32	3.73	3.26	3.54	6.59	0.35	0.49	0.83	0.65	1.14	0.49	0.91
	c1123f12p41295	-6.16	3.73e-06	0.00497	0.85	3.75	5.68	2.45	4.48	3.2	3.11	0.39	0.09	0.53	0.46	1.66	0.06	0.63
	c112410f1p54494	-7	9.07e-06	1.94e-05	1.94	9.63	10.23	8.53	9.89	8.25	6.98	0.68	0.12	1.26	0.91	2.54	0.8	1.61
	c112446f1p04896	-5.97	5.92e-06	0.000564	1.01	6.76	8.44	4.24	6.78	5.61	3.87	0.69	0.36	0.43	0.47	2.42	0.63	1.15
	c112458f1p14765	-5.09	5.98e-06	0.000617	1.33	6.65	7.78	4.5	6.61	5.9	6.91	0.85	0.45	1.06	0.77	2.06	0.81	1.8
	c112467f1p34835	-7.74	3.45e-06	0.0063	0.11	2.15	4.32	4.08	5.28	2.82	1.46	0.16	0.09	0.48	0.43	0.61	0.19	0.64
	c112469f1p04571	-6.78	1.74e-05	0.00305	2.37	26.7	10.72	9.87	24.65	21.89	10.45	1.02	0.83	1.21	2.91	4.14	1.53	4.11
	c112470f1p14647	-4.74	7.28e-06	0.00603	0.57	8.38	10.99	7.06	11.01	3.78	7.27	0.72	0.57	1.59	0.69	4.65	0.55	1.59
	c112471f1p34387	-5.49	5.66e-06	0.000723	0.54	4.76	5.11	5.35	8.1	6.8	5.11	0.69	0.53	0.34	0.73	2.18	0.63	1.41
	c112472f1p04389	-5.47	6.22e-06	0.000377	1.38	5.28	7.55	5.2	8.43	6.25	6.23	0.59	0.61	0.93	0.64	2.18	0.62	1.79
	c11247f1p3871	-7.39	3.2e-05	3.48e-05	4.33	28.27	44.74	27.42	33.44	26.63	28.41	3.22	1.67	4.43	4.96	4.56	2.53	4.78
	c112488f1p04419	-4.37	3.78e-06	0.01	0.98	6.03	3.16	4.66	5.04	2.77	3.8	0.63	0.48	0.62	0.47	1.94	0.82	1.09
	c112496f1p44816	-5.59	5e-06	0.00462	0.86	3.82	4.8	5.24	8.67	5.88	2.34	0.45	0.14	1.02	0.37	1.91	0.47	1.28
	c112505f1p13692	-4.74	4.51e-06	0.00353	1.64	4.23	3.09	3.99	7.55	5.76	3.99	0.26	0.18	0.49	0.67	1.61	0.82	2.35
	c112513f1p04633	-6.83	6.69e-06	0.00171	1.19	6.05	7.9	3.28	9.43	8.98	3.68	0.81	0.29	0.73	0.82	1.66	0.71	0.91
	c112526f1p04600	-5.1	4.2e-06	0.00435	1.06	5.06	3.27	4.09	6.23	4.81	3.3	0.58	0.49	0.74	1.13	1.06	0.7	0.75
	c11252f2p31591	-4.23	4.51e-06	0.00476	0.69	5.56	2.45	6.89	4.52	5.29	5.68	0.74	0.77	2.43	0.98	1.35	0.21	0.87
	c112534f1p02064	-5.11	6.7e-06	0.00029	1.06	4.94	8.22	6.27	8.7	6.73	7.25	1.09	0.22	1.35	0.65	2.47	0.28	2.38
	c112539f1p04643	-6.6	5.18e-06	0.00072	1.05	4.11	7.03	3.89	5.68	4.55	5.78	0.54	0.22	0.46	0.75	1.73	0.33	0.83
	c112553f1p05266	-5.42	3.55e-06	0.00806	0.7	4.48	3.57	3.31	4.39	3.18	3.53	0.38	0.25	0.65	0.7	1.16	0.39	0.75
	c112556f1p04884	-6.25	3.08e-06	0.01	0.47	4.79	3.39	1.62	4.18	1.51	3.49	0.24	0.14	0.31	0.48	0.9	0.33	0.71
	c112565f1p14621	-5.12	3.76e-06	0.00723	0.7	3	5.71	3.65	3.81	3.79	4.27	0.52	0.39	0.72	0.74	1.39	0.42	0.69
	c11256f1p0861	-6.54	4.9e-06	0.000975	1.32	2.26	4.89	4.23	5.59	7.56	4.35	1.04	0	0.79	1.16	0.32	0.16	1.14
	c112573f1p02719	-8.77	3.26e-06	0.00518	0.44	0.64	3.29	4.1	4.82	2.79	3.07	0.14	0.16	0.47	0.36	0.52	0.14	0.4
	c112589f1p04869	-8.48	3.71e-06	0.00298	0.34	5.43	3.87	2.39	2.4	3.81	3.75	0.19	0.32	0.34	0.59	0.44	0.2	0.52
	c11258f7p01103	-5.59	8.03e-06	0.00259	1.99	1.72	11.08	9.9	10.71	8.98	6.66	0.45	0.61	1.85	1.68	0.9	0.86	2.79
	c112602f1p14564	-9.68	3.2e-06	0.01	0.18	4.63	3.67	1.88	3.81	0.09	3.99	0.16	0.07	0.48	0.11	0.18	0.33	0.55
	c112607f1p04868	-5.07	3.91e-06	0.00618	0.62	4.49	5.64	2.03	3.91	4.8	4.46	0.42	0.25	0.44	0.67	1.77	0.35	1.22
	c112610f1p324813	4.17	-0.000171	0.01	114.44	12.48	29.61	16.25	12.37	16.78	12.28	195.23	243.15	119.99	109.45	61.03	127.41	37.44
	c112611f1p04554	-4.01	4.32e-06	0.00757	0.73	6.25	5.3	4.42	5.71	4.77	4.19	1.05	0.32	0.68	0.64	2.53	1.17	1.44
	c112619f1p04842	-4.94	4.11e-06	0.00532	0.48	5.33	5.99	3.42	3.93	3.74	4.78	0.6	0.34	0.75	0.53	1.37	0.34	1.66
	c112637f1p04596	3.66	-0.00011	5.64e-05	91.74	13.43	5.82	14.7	4.46	20.08	16.4	110.2	90.21	77.23	92.01	82.02	91.4	67
	c112639f1p24582	-6.22	7.57e-06	0.00662	1.96	8.71	14.31	3.96	6.52	8.04	3.63	0.46	0.44	1.04	0.26	3.94	0.29	1.15
	c112648f1p14821	-4.51	6.47e-06	0.00232	1.2	8.32	3.29	6.43	9.34	6.48	8.72	0.6	0.49	1.69	1.62	1.97	1.13	2.21
	c112651f1p04788	-6.72	5.87e-06	0.000305	1.09	6.12	7.27	3.94	5.88	5.74	6.19	0.43	0.4	0.66	0.72	1.83	0.51	0.84
	c112655f1p04732	-5.71	3.9e-06	0.00471	1.05	3	5	3.44	5.23	3.57	3.65	0.47	0.23	0.41	0.67	1.16	0.43	1
	c112656f1p04653	-5.57	2.31e-05	0.000412	3.92	16.43	36.29	23.74	23.05	25.35	19.99	3.31	1.3	1.33	3.63	11.12	2.58	3.46
	c112658f1p04431	-6.73	7.81e-06	6.21e-05	1.35	8.13	8.47	5.07	8.7	6.32	9	0.52	0.25	0.88	0.8	2.27	0.84	1.42
	c112659f1p04697	-5.13	4.52e-06	0.00305	0.62	5.27	5.15	5.07	5.12	3.23	5.61	0.51	0.5	0.79	0.79	1.27	0.64	1.36
	c112662f1p14257	-5.17	5.76e-06	0.00159	0.65	5.67	4.99	4.11	8.48	5.49	7.82	0.6	0.47	1.09	0.65	2.2	0.82	1.37
	c11266f8p1821	-7.6	2.07e-05	0.000405	1.23	22.81	11.95	21.01	28.56	22.03	16.93	0.31	0.95	4.8	2.27	0.3	2.13	5.63
	c112686f1p03097	-4.73	3.85e-06	0.00761	1.12	3.4	6.29	2.72	4.86	4.15	3.57	0.18	0.08	1.36	0.35	1.48	0.87	1.2
	c112694f1p04958	-6.66	3.61e-06	0.00503	0.49	4.23	5.26	3.55	2.54	3.64	2.68	0.1	0.24	0.6	0.48	0.32	0.25	1.38
	c112701f1p04787	-5.34	5.77e-06	0.000671	0.97	7.08	6.33	5.84	6.25	4.69	6.61	0.53	0.29	1.01	1.04	1.86	0.62	1.71
	c112710f1p04517	-9.52	6.29e-06	0.000302	0.63	5.56	8.97	4.46	6.25	3.7	6.27	0.25	0.17	0.17	0.61	1.32	0.36	0.89
	c112722f1p15153	-5.36	3.15e-06	0.01	0.66	1.81	4.31	3.06	3.76	3.58	3.37	0.48	0.13	0.59	0.3	1.01	0.37	0.96
	c112727f1p04694	-4.76	5.59e-06	0.00115	1.29	5.94	7.35	4.24	5.93	5.26	7.84	0.79	0.69	1.35	0.71	2.66	0.49	1.26
	c112730f1p04515	-7.42	4.05e-06	0.0023	0.67	3.42	3.16	3.46	6.48	4.34	2.92	0.28	0.1	0.59	0.31	0.9	0.37	0.75
	c112746f1p15089	-6.81	2.85e-06	0.01	0.87	1.5	5.02	1.99	3.56	2.9	1.69	0.4	0.13	0.3	0.01	0.96	0.25	0.51
	c112751f1p04543	-5.61	3.06e-06	0.01	0.49	2.47	5.08	2.8	2.75	2.31	3.93	0.34	0.3	0.44	0.5	1.12	0.31	0.54
	c112754f1p14284	-5.26	7.28e-06	0.000141	2.33	8.01	7.88	5.59	10.34	4.58	7.88	0.71	0.52	1.65	0.73	2.44	1.01	1.8
	c112769f1p03256	-4.88	2.12e-05	5.18e-05	4.05	21.73	21.51	27.57	24.23	23.25	18.84	2.59	1.83	3.83	2.45	9.12	2.96	6.16
	c112795f1p04512	-7.85	4.24e-06	0.00158	0.79	2.88	4.7	3.65	5.36	3.39	4.55	0.13	0.1	0.18	0.21	1.78	0.08	0.74
	c112823f1p04466	-5.14	3.37e-06	0.01	0.51	2.71	5.88	2.57	3.3	1.82	4.94	0.24	0.13	0.93	0.57	1.33	0.4	0.63
	c112831f1p32437	-4.67	1.95e-05	0.00974	3.54	13.77	25.77	13.44	40.43	18.2	17.76	2.47	1.47	4.71	3.05	9.52	1.94	5.3
	c112860f1p04487	-4.63	3.89e-06	0.0077	1.11	4.9	2.67	4.69	5.22	3.32	4.58	0.49	0.22	1.23	0.51	0.98	0.69	1.59
	c112864f1p04689	-4.94	8.16e-06	0.000101	1.92	8.97	11.2	6.42	9.19	7.79	7.75	0.91	0.5	1.33	1.48	2.7	1.1	2.75
	c112879f1p34669	-5.35	1.99e-05	2.83e-05	4.56	24.49	23.44	16.64	23.13	19.5	17.03	2.09	0.74	3.37	2.65	8.04	2.28	4.93
	c112884f1p04425	-4.05	4.4e-06	0.00627	1.52	3.97	6.68	3.07	4.36	7.81	3.95	0.38	0.41	0.75	1.02	2.58	0.62	1.99
	c112891f1p204707	-4.79	1.9e-05	0.000133	4.98	25.23	17.45	22.19	17.87	16.54	22.48	1.17	1.57	3.09	4.56	2.64	1.53	11.91
	c11289f2p1705	-5.01	4.42e-06	0.00323	1.17	4.65	2.65	2.29	6.22	5.45	6.27	0.53	0.32	1.17	0.84	0	0.76	2.1
	c112904f1p05295	-4.67	4.93e-06	0.00252	0.62	3.73	7.4	5.58	6.21	5.13	5.06	0.58	0.3	0.87	0.72	2.75	0.7	1.31
	c112915f1p04174	-4.53	4.01e-06	0.00714	0.99	4.34	4.16	3.83	4.86	4.36	4.98	0.51	0.28	0.94	0.57	2.16	0.49	1.14
	c112916f1p04427	-8.08	3.14e-06	0.00695	0.64	3.42	3.98	3.87	3.39	2.07	1.34	0.07	0.08	0.48	0.27	0.39	0.32	0.73
	c112919f1p04363	-7.24	6.02e-06	0.000681	2.14	9.7	3.52	6.38	2.77	6.07	5.15	0.31	0	0.2	0.88	1.08	0.27	2.2
	c112922f1p04893	-5.25	4.41e-06	0.00313	1.3	4.82	4.8	3.34	6.15	3.75	4.74	0.38	0.46	0.9	0.44	1.69	0.59	1.04
	c112944f1p04575	-5.24	4.82e-06	0.00199	0.87	5.08	5.27	5.03	5.08	4.62	5.69	0.27	0.3	1.08	0.9	1.82	0.45	1.22
	c112947f1p23800	-5.09	4.68e-06	0.00252	1.27	6.04	6.15	3.39	4.16	4.27	5.71	0.53	0.58	1.06	0.5	1.61	0.56	1.23
	c112951f1p04320	-5.09	1.08e-05	0.000174	2.01	10.28	16.02	9.58	11.67	8.85	12.09	1.18	0.65	1.82	2.34	3.84	1.21	2.82
	c112976f1p05306	-5.03	3.62e-06	0.00887	0.47	3.24	3.95	3.58	4.78	3.2	4.95	0.47	0.34	0.54	1.18	0.8	0.27	1.21
	c112977f1p14848	-6.24	6.93e-06	0.000121	1.52	7.05	7.77	7.3	7.26	5.41	7.11	0.49	0.35	1.33	0.91	1.42	0.51	1.96
	c112985f1p72743	-4.69	5.4e-06	0.01	0.84	1.39	7.67	7.36	5.28	8.29	5.26	0.44	0.29	1.41	1	1.05	0.85	2.66
	c113006f1p03883	-5.11	6.26e-06	0.00046	1.37	5.74	9.33	5.93	6.21	5.8	7.13	0.68	0.37	1.28	1.34	1.36	1.12	1.98
	c113007f1p04552	-5.49	6.15e-06	0.00237	0.78	7.6	10.2	4.56	5.11	4.4	6.55	1.05	0.27	0.64	0.44	2.94	0.44	1.36
	c113031f1p03372	-4.85	5.36e-06	0.00134	1.68	7.83	3.62	5.97	7.11	5.18	4.52	0.47	0.76	0.98	0.51	1.83	0.85	2
	c11305f1p01285	-3.83	4.14e-06	0.01	2.07	3.78	3.15	5.53	4.32	6.23	4.98	0.26	0.09	0.88	0.93	3.67	0.29	1.72
	c113073f1p04462	-4.82	9.09e-06	9.3e-05	1.62	10.01	8.43	10.51	10.78	7.94	10.64	0.88	0.73	1.68	1.48	3.78	1.25	2.65
	c113079f1p04832	-6	4.7e-06	0.00165	0.38	4.88	5.35	4.61	4.1	5.15	5.41	0.68	0.02	1.07	0.69	1.32	0.49	0.71
	c113084f1p01368	-8.46	3.03e-06	0.00753	0.57	2.14	2.9	3.39	4.48	2.13	2.36	0.19	0.35	0.64	0.23	0.64	0.03	0.04
	c113085f1p04858	-6.82	3.11e-06	0.00895	0.55	2.71	3.09	4.79	1.84	3.8	2.29	0.08	0.35	0.22	0.2	1.04	0.32	0.59
	c113093f1p11923	-6.2	3.44e-06	0.00797	1	2.34	6	1.97	2.95	1.87	4.99	0.26	0.23	0.39	0.89	1.03	0.09	0.51
	c113096f1p34755	-4.88	1.4e-05	0.01	2.37	10.41	3.91	14.22	21.36	24.08	16.81	2.3	0.82	2.58	1.52	4.9	1.68	5.3
	c113104f1p04765	-4.77	5.63e-06	0.00107	1.76	7.07	6.24	4.29	6.08	5.97	6.51	0.82	0.47	0.72	0.77	2.94	0.91	1.33
	c11310f2p2912	-8.55	1.49e-05	0.000448	0.91	14.42	21.32	12.58	16.14	7.1	15.51	0.82	0.74	0.99	1.47	2.71	0.91	2.64
	c113115f1p05136	-7.97	2.91e-06	0.00924	0.84	2.67	2.84	1.77	2.01	2.26	4.87	0.14	0.04	0.49	0.19	0.66	0.18	0.47
	c113128f1p04648	-6.77	3.18e-06	0.00851	0.49	2.85	5.36	1.56	2.91	3.01	3.49	0.13	0.25	0.2	0.31	1.05	0.13	0.83
	c11312f1p01129	-8	3.9e-06	0.00249	0.67	3.62	3.53	5.15	4.46	1.13	4.79	0.23	0	0.55	0.41	0.97	0.53	0.23
	c113136f1p04938	-5.27	3.59e-06	0.0082	0.58	4.45	2.22	3.11	4.9	3.66	4.64	0.46	0.41	0.54	0.63	1.25	0.45	0.73
	c113146f1p14435	-6.88	5.23e-06	0.00216	0.56	8.35	6.37	2.77	4.63	4.1	4.73	0.3	0.2	0.55	0.7	1.43	0.33	1.06
	c113187f1p04461	-6.52	2.85e-06	0.01	0.49	2.56	4.29	2.27	3.13	2	3.01	0.14	0.15	0.34	0.37	1.09	0.27	0.37
	c113197f1p04634	-6.98	4.57e-06	0.01	0.97	9.11	3.17	3.16	3.31	2.29	5.48	0.26	0.07	0.49	0.19	1.37	0.17	1.38
	c113213f1p04413	-7.21	2.71e-06	0.01	0.21	4.24	3.59	1.35	2.2	2.03	3.05	0.27	0.08	0.39	0.29	0.45	0.37	0.47
	c11321f1p31171	-6.06	5.94e-06	0.00129	1.33	5.17	9.47	4.9	7.41	5.53	2.96	0.29	0.19	0.32	0.57	1.97	0.89	1.84
	c11322f4p2778	-5.91	5.76e-05	3.23e-05	8.98	58.17	67.16	68.96	53.64	61.04	47.17	6.14	4.03	5.94	4.59	21.05	6.2	13.87
	c113239f1p14464	-5.72	1.72e-05	1.71e-05	4.12	19.58	19.54	17.26	19.72	16.54	12.03	1.47	1.22	2.6	2.78	4.5	2.07	4.39
	c113244f1p02512	-8.3	3.05e-06	0.00746	0.49	2.22	3.18	3.46	3.39	3.78	1.53	0.09	0.25	0.33	0.36	0.55	0.18	0.41
	c113247f1p04529	-5.79	2.96e-06	0.01	0.73	2.98	3.37	1.82	3.81	3.56	2.61	0.3	0.22	0.33	0.59	1.04	0.16	0.61
	c11324f1p11775	-5.98	4.44e-06	0.01	1.6	3.71	5.84	8.45	3.62	0.85	3.67	0.4	0.19	0.17	1.59	0.56	1.01	0.72
	c113251f1p04976	-6.65	3.11e-06	0.00955	0.62	3.44	2.84	2.38	3.66	3.42	2.84	0.27	0.25	0.42	0.38	0.83	0.29	0.44
	c113253f1p05113	-7.68	3.73e-06	0.00312	0.26	3.1	5.14	3.41	5.29	1.62	3	0.09	0.28	0.17	0.61	0.2	0.18	1.31
	c113272f1p22345	-7.47	1.87e-05	0.00118	0.35	15.45	22.84	26.14	23.76	14.07	10.97	2.77	0.24	2.1	1.46	0.74	2.78	5.11
	c113277f1p04361	-6.09	4.51e-06	0.00196	1.28	6.67	4.76	3.61	6.01	4.08	2.04	0.54	0.33	0.54	0.6	1.38	0.46	0.82
	c11327f2p0560	-5.31	9.44e-05	0.00265	15.76	89.79	51.29	137.25	151.97	110.43	60.82	7.11	6	28.67	25.39	24.37	9.13	15.6
	c113282f1p04842	-5.52	4.29e-06	0.00322	0.78	2.83	6.05	4.72	5.1	2.68	5.68	0.48	0	0.58	0.51	1.66	0.46	1.36
	c113285f1p04273	-5.24	2.46e-05	0.00014	4.96	17.39	35.06	29.27	29.03	21.14	24.29	2.16	0.8	4.1	4.08	9.38	2.82	7.42
	c113290f1p14644	-5.44	3.44e-06	0.00912	0.83	3.21	5.91	2.87	3.37	2.23	3.95	0.39	0.14	0.6	0.27	1.62	0.26	0.82
	c113296f1p04528	-4.21	4.22e-06	0.00696	0.85	4.24	5.66	4.75	4.6	4.82	4.92	0.35	0.48	0.89	0.64	2.57	0.46	1.69
	c113299f1p24864	-4.44	4.92e-06	0.00284	1.42	4.31	6.58	5.39	5.03	6.69	4.54	0.84	0.23	0.82	0.8	2.46	0.91	1.59
	c11329f1p1974	-7.8	2.75e-06	0.01	0	0.89	2.52	3.4	2.98	2.55	4.14	0.13	0	0.16	0.15	0.68	0.26	0.74
	c1132f3p01641	-15.54	2.82e-06	0.00723	0.45	3.59	4.3	3.46	1.3	0.84	1.27	0.13	0	0.28	0.14	0.1	0.03	0.31
	c113315f1p32535	-6.04	2.28e-05	4.9e-05	4.31	21.39	21.56	25.87	25.15	28.46	15.95	2.11	1.41	2.33	1.56	8.64	2.26	5.31
	c113318f1p04500	-5.69	9.36e-06	0.000926	1.83	14.96	12.58	8.43	8.61	6.53	6.57	0.86	0.76	2.52	1.6	0.27	1.07	3.36
	c113324f1p04715	-6.42	8.17e-06	0.000369	1.45	10.07	8.78	6.24	7.83	4.43	11.23	0.47	0.33	1.03	0.55	3.11	0.6	1.68
	c113352f1p04405	-9.35	7.45e-06	0.01	0.75	6.02	15.71	5.97	2.77	6.36	5.64	0.62	0.13	0.33	0.54	1.44	0.77	0.79
	c113359f1p04867	-9.68	2.75e-06	0.00979	0.33	1.76	4.39	1.1	3.08	2.36	2.98	0.22	0.09	0.18	0.25	0.57	0.12	0.22
	c11335f1p01037	-5.19	9.05e-06	0.0001	1.24	9.2	7.66	10.24	10.94	9.72	9.38	1.01	0.32	2.12	1.58	3.51	1.16	1.54
	c11336f2p0919	-4.35	1.79e-05	0.00889	6.2	10	10.84	27.9	17.15	18.93	32.37	2.6	0.49	4.7	0.32	11.79	3.57	4.92
	c113371f1p14683	-4.62	3.51e-06	0.01	0.77	4.82	4.35	4.38	3.61	2.77	3.42	0.52	0.29	0.65	0.4	2.09	0.6	0.69
	c113379f1p010648	-4.39	3.75e-06	0.01	0.87	3.55	4.86	2.95	4.09	6.16	3.59	0.45	0.53	1.21	0.66	1.66	0.37	1.06
	c113387f1p04740	-6.36	2.77e-05	2.02e-05	7.04	19.35	31.14	20.62	34.5	25.75	33.2	3.22	2.14	4.48	3.69	6.91	2.03	4.49
	c113393f1p04633	-5.83	3.27e-06	0.00993	0.57	4.41	3.48	2.64	3.88	3.12	2.85	0.28	0.34	0.86	0.42	0.73	0.36	0.61
	c113407f1p04680	-9.52	9.22e-06	0.00373	1.86	2.55	7.64	15.14	11.43	4.62	9.73	0.46	0.29	0.66	0.98	2.33	0.54	0.3
	c113427f1p25053	-11.66	5.04e-06	0.00301	0.11	3.91	5.34	3.98	2.35	4.07	8.33	0.56	0.07	0.34	0.24	0.74	0.12	0.36
	c113456f1p05253	-5.79	7.49e-06	0.00086	1.2	5.89	11.48	5.16	9.09	8.48	5.84	0.92	0.49	0.52	0.99	2.43	0.93	1.88
	c11345f2p0726	-3.38	5.81e-06	0.01	2.4	3.34	8.93	8.28	7.11	4.37	10.33	0.58	0.46	3.44	0.92	2.96	0.8	4.1
	c113463f1p04563	-6.25	8.93e-06	9.83e-05	1.14	11.25	7.35	7.45	10.16	7.81	9.78	0.69	0.44	0.86	1.51	2.78	0.98	1.53
	c11348f3p4814	-7.75	5.8e-05	0.000235	7.68	33.44	53.55	52.7	86.74	63.42	50.38	4.68	1.1	16.37	5.58	1.12	8.07	7.96
	c113493f1p04661	-9.82	6.13e-06	0.00569	0.33	3.83	10.83	5.29	7.67	2.96	4.26	0.4	0.07	0.23	0.22	1.86	0.23	0.56
	c113495f1p14963	-6.17	1.02e-05	0.000343	2.32	8.42	16.3	6.09	10.94	10.49	8.95	1.12	0.85	1	1.25	3.13	1.03	1.91
	c113510f1p24513	-8.11	4.12e-06	0.00641	0.77	2	6.91	1.83	3.8	3	5.73	0.18	0.17	0.15	0.21	1.39	0.24	0.62
	c11351f1p0640	-14.3	5.18e-06	0.000182	0.29	5.15	4.51	4.44	5.12	3.88	5.43	0.39	0	0.35	0.23	0.78	0.26	0
	c113524f1p14419	-7.58	2.71e-06	0.01	0.33	1.57	2.28	2.11	4.1	2.84	3.11	0.11	0.28	0.29	0.27	0.49	0.16	0.56
	c11352f1p51622	-5.89	9.3e-06	0.00115	1.07	10.09	8.67	9.66	6.95	6.85	15.16	0.9	0.75	1.07	1.41	2.94	0.89	1.95
	c113547f1p24637	-7.23	3.04e-06	0.00942	0.2	4.11	2.02	2.27	2.85	2.17	4.91	0.26	0.22	0.39	0.37	0.66	0.13	0.53
	c113552f1p14672	-6.33	6.36e-06	0.000209	1.29	5.92	7.79	5.38	7.07	6.65	5.69	0.71	0.6	0.89	0.67	1.64	0.67	1.11
	c113567f1p14660	-5.3	1.64e-05	0.000201	2.62	15.44	19.95	14.45	22.94	12.23	19.33	2.26	1.11	2.18	1.93	7.24	2.22	3.25
	c113568f1p04525	-6.19	5.81e-06	0.000869	0.84	5.41	7.79	7.61	5.82	2.8	5.47	0.44	0.43	0.5	0.75	1.77	0.35	1.53
	c113569f3p54428	-5.48	1.79e-05	0.00224	3.94	31.12	23.69	9.12	15.8	14.89	16.88	1.59	0.76	5.28	0.92	7.52	1.16	3.81
	c113570f1p14876	-5.17	5.56e-06	0.01	0.63	1.9	6.29	3.58	7.26	8.01	8.47	0.89	0.46	1.09	0.74	0.68	0.88	2.24
	c113572f1p15291	-6.5	8.03e-06	0.00091	1.61	3.94	7.63	9.37	12.07	9.19	5.2	0.36	0.15	0.91	0.59	3.19	0.76	1.58
	c113602f1p14789	-5.67	9.25e-06	9.64e-05	1.44	7.3	9.94	9.07	12.33	8.47	9.78	1.01	1.01	1.32	1.09	3.14	1.11	1.63
	c113606f1p04625	-5.47	1.46e-05	9.16e-05	2.54	14.9	20.35	10.52	14.54	16.54	14.32	1.65	1.23	2.08	2.85	5.18	1.32	2.82
	c113609f1p04981	-5.16	3.6e-06	0.00837	0.79	5.32	3.42	3.42	3.74	2.3	4.77	0.31	0.18	0.79	0.4	1.64	0.36	0.92
	c113626f1p14516	-5.02	4.24e-06	0.00451	0.47	2.6	5.32	4.22	4.17	6.98	3.74	0.35	0.42	1.05	0.39	1.9	0.57	0.79
	c113656f1p04339	-5.64	3.73e-06	0.00531	0.59	1.79	4.04	3.66	5.78	2.44	5.1	0.48	0.23	0.68	0.41	1.16	0.25	0.94
	c113663f1p04937	-6.45	4.78e-06	0.00225	0.82	4.07	8.47	4.28	3.57	3.74	4.19	0.44	0.48	0.54	0.15	1.43	0.6	0.87
	c11366f1p01548	-6.07	8.07e-06	0.00323	1.24	3.45	14.34	7.11	7.92	8.14	8.2	0.83	0.43	1.02	0.76	2.12	0.53	2.6
	c113678f1p24443	5.36	-0.00164	0.0003	1278.45	26.16	1.75	46.74	1.07	131.79	61.34	1752.71	1226.23	933.32	1183.01	942.74	1376.58	877.02
	c113685f1p04902	-5.43	5.31e-06	0.00107	0.91	5.93	7.69	5.5	5.97	4.39	4.4	0.93	0.29	0.62	0.7	1.61	1.1	1.15
	c113689f2p11861	-6.25	4.66e-06	0.00435	0.94	4.84	1.4	4.4	7.52	5.86	3.66	0.23	0.42	0.94	0.64	0.49	0.38	1.49
	c11368f1p21178	-7.15	1.99e-05	0.00119	2.26	23.7	9.07	19.76	18.41	16.29	31.16	1.96	1.14	4.05	3.98	0.77	0.35	4.62
	c113692f1p04924	-8.5	2.77e-06	0.01	0.13	1.44	3.6	2.39	2.79	2.41	3.67	0.08	0.07	0.38	0.39	0.39	0.23	0.4
	c113702f1p13411	-4.39	9.28e-06	0.00202	0.91	12.73	8.02	8.81	14.86	9.04	9.84	1.27	0.49	3.88	0.83	4.14	1.08	2.95
	c113705f1p34357	-5.87	7.81e-06	0.000174	1.56	5.68	9.52	5.1	9.24	8.16	9.42	0.81	0.59	0.59	0.55	3.47	0.64	1.66
	c113708f1p04715	-5.56	6.76e-06	0.00135	1.05	6.84	6.32	5.37	11.27	7.3	4.75	0.73	0.23	1.45	0.73	2.13	0.5	1.94
	c11370f2p31239	-8.28	3.98e-06	0.00769	0.59	7.42	3.84	2.02	2.14	4.23	2.92	0.14	0	0.92	0.78	0.2	0.1	0.66
	c113715f1p04643	-4.93	1.56e-05	3.15e-05	3.96	13.9	15.97	14.4	21.78	16.98	16.27	1.79	0.96	3.23	2.59	6.42	2.07	3.88
	c113730f1p04376	3.52	-0.000125	9.06e-05	115.25	15.59	6.01	18.91	1.14	25.43	18.32	104.45	107	101.73	108.29	101.26	105.21	77.65
	c113751f1p04418	-4.02	1.25e-05	0.00541	5.42	21.75	6.43	8.64	17.84	16.53	11.91	1.05	1.29	1.18	1.77	6.5	1.99	8.26
	c113772f1p45112	-5.52	4.72e-06	0.00538	0.29	4.77	5.89	2.88	7.46	5.77	2.96	0.61	0.35	0.53	0.74	1.7	0.4	1.11
	c113781f1p04301	-5.57	4.4e-06	0.00281	0.88	3.59	5.18	3.51	7.28	3.48	4.55	0.37	0.25	0.59	0.8	1.43	0.52	1.16
	c113786f1p04637	-6.29	5.16e-06	0.000862	0.46	6.39	5.16	3.59	5.63	3.5	6.81	0.35	0.53	0.92	0.58	1.06	0.53	1.04
	c113794f1p04459	-8.96	4.31e-06	0.00112	0.6	2.03	3.12	5.18	3.89	4.22	6.04	0.08	0.1	0.48	0.25	1.25	0.19	0.45
	c113798f1p04368	-5.57	4.45e-06	0.00263	0.98	5.56	3.97	3.31	6.71	3.99	4.24	0.62	0.18	0.62	0.61	1.56	0.6	0.98
	c113815f1p14683	-4.47	4.18e-06	0.01	0.98	2.62	7.71	2.82	5.13	6.2	2.84	0.61	0.21	1.03	0.62	2.32	0.24	1.29
	c113821f1p04926	-5.71	3.4e-06	0.0088	0.38	1.88	3.88	3.21	5.2	3.94	3.36	0.35	0.23	0.47	0.37	1.07	0.42	0.93
	c11383f1p01178	-5.47	6.3e-06	0.000302	0.93	8.66	6.6	5.9	5.55	4.91	7.3	0.39	0.28	1.15	1.01	2.87	0.67	0.91
	c11384f2p0558	-6.64	8.15e-06	0.01	1.48	8.68	5.94	3.87	16.92	4.94	8.46	0.67	1.2	1.08	2.66	0.15	0.15	1.65
	c113855f1p04676	-4.38	0.000119	0.000121	22.22	100.98	156.51	130.3	140.24	146.2	131.15	14.37	7.27	21.34	25.74	51.05	18.41	50.92
	c113869f1p04679	-5.72	4e-06	0.01	1.49	5.05	1.78	2.22	7.59	4.79	2.25	0.07	0.45	0.61	1.28	0.6	0.6	0.78
	c113871f1p14637	-5.82	4.76e-06	0.00166	0.63	5.16	5.92	4.88	5.39	3.69	4.83	0.38	0.29	0.6	0.66	1.39	0.54	1.38
	c113877f1p14828	-5.9	4.87e-06	0.00764	0.45	3.71	6.39	7.85	3.4	6.36	2.29	0.32	0.37	0.94	0.12	1.57	0.68	1.17
	c113904f1p04745	-6.57	3.76e-06	0.00421	0.92	4.36	4.55	3.53	3.28	2.94	3.67	0.29	0.26	0.69	0.32	1.08	0.26	0.65
	c11390f1p01017	-5.63	3.45e-06	0.00829	0.99	4.94	4.12	3.46	2.85	1.76	4.1	0.29	0.11	0.45	0.51	1.06	0.57	0.96
	c113916f1p05005	-12.81	4.1e-06	0.00254	0.37	2	4.08	5.87	2.34	2.31	5.54	0.13	0.13	0.45	0.09	0.46	0.32	0.16
	c113917f1p04910	-3.85	4.7e-06	0.00563	1.51	7.07	3.43	4.17	6.52	4.48	7.25	0.59	0.43	2.14	1.42	2.28	0.54	1.54
	c113923f1p04514	-5.92	4.51e-06	0.00205	0.97	4.59	4.04	3.89	6.4	5.78	2.88	0.32	0.4	0.2	0.48	2.17	0.39	0.87
	c11392f2p01770	-8.27	5.86e-06	0.00584	0.99	4.5	5.78	2.63	9.88	7.94	2.59	0.19	0.19	1.75	0.34	0.93	0.14	0.61
	c113947f1p05289	-4.04	4.99e-06	0.00604	1.11	3.66	4.09	4.98	8.37	7.77	5.03	0.53	0.43	1.37	0.57	2.51	0.74	2.52
	c113950f1p04315	-10.99	4.31e-06	0.00234	0.02	2.53	4.17	5.65	2.54	3.1	6.14	0.12	0.18	0.4	0.21	0.15	0.92	0.21
	c113954f1p04643	-6.76	5.71e-06	0.00208	0.63	3.88	5.34	5.43	9.85	4.58	4.88	0.41	0.34	0.59	0.82	1.6	0.59	0.77
	c113971f1p24225	-6.5	5.5e-06	0.000635	1.61	5.4	4.09	3.66	9.1	5.37	4.13	0.32	0.21	0.86	0.56	1.68	0.44	1.07
	c11398f1p01300	-5.72	8.77e-06	0.000186	0.99	7.46	12.31	8.63	9.11	8.49	8.23	0.77	0.34	1.69	1.26	3.12	0.89	1.58
	c113997f1p04841	-8.19	4.84e-06	0.000686	0.68	2.78	5.16	3.35	5.88	4.26	6.66	0.46	0.23	0.72	0.6	1	0.25	0.26
	c11399f17p2926	-4.51	0.000115	0.000756	24.99	115.22	123.16	95.24	207.69	128.36	99.43	12.88	9.67	26.39	33.57	35.78	15.02	42.75
	c11400f3p11000	-6.63	5.7e-06	0.01	0.28	7.28	9.67	2.57	2.4	6.21	6.53	0.13	0.22	1.36	0.52	2.32	0.67	0.05
	c114013f1p24581	-4.09	4.69e-06	0.00476	1.22	7.11	4.97	5.3	5.34	5.48	4.15	0.74	0.56	1.14	0.67	2.65	0.99	1.47
	c114020f1p04540	-5.07	1.35e-05	0.00017	2.77	12.81	19.99	13.46	12.14	11.5	15.96	1.37	0.76	1.98	2	6.35	1.12	3.91
	c114022f1p24141	-4.88	3.48e-05	0.000144	6.1	47.95	37.44	25.18	42.93	38.64	34.99	2.78	1.3	8.32	6.34	12.79	4.77	11.51
	c114030f1p02575	-5.31	4.12e-06	0.00436	0.46	4.35	5.91	5.96	2.29	3.68	4.35	0.5	0.3	0.44	0.52	1.63	0.24	1.45
	c114032f1p14908	-7.22	4.93e-06	0.00179	1.14	7.28	6.97	2.9	4.55	4.2	2.37	0.29	0.5	0.48	0.27	1.43	0.55	0.56
	c114033f1p24474	-5.76	7.19e-06	0.00011	1.5	4.77	8.46	6.69	8.85	8.24	6.31	0.81	0.43	1.2	0.6	2.79	0.44	1.51
	c11403f9p11827	-4.51	2.12e-05	9.74e-05	6.34	20.4	15.17	23.85	26.43	21.91	30.28	1.6	1.16	6.88	3.59	8.69	2.91	7.17
	c114063f1p04383	-23.73	3.6e-06	0.00292	0.1	0.83	4.79	4.35	3.61	3.61	1.61	0.03	0.03	0.09	0.07	0.34	0.03	0.22
	c114065f1p01507	-5.27	7.22e-06	0.00219	1.41	3.13	10.62	8.6	8.18	5.36	9.48	0.36	0.82	1.47	0.7	3.65	0.36	1.51
	c114069f1p05377	-4.75	4.07e-06	0.00604	0.74	3.46	4.73	3.75	7.28	3.87	3.87	0.51	0.41	0.74	0.69	1.92	0.45	1.11
	c114076f1p24975	3.05	-5.67e-05	2.73e-05	46.14	10.71	2.58	13.04	0.38	20.98	16.31	51.31	41.15	47.81	45.91	58.35	41.69	49.31
	c11407f1p01636	-6.96	5.79e-06	0.00239	1.47	4.43	5.71	6.65	9.74	1.94	4.97	0.43	0.5	0.43	0.52	1.64	0.34	1.15
	c114104f1p04371	-5.71	6.45e-06	0.00154	0.69	6.86	9.35	4.99	8.86	3.98	6.04	0.61	0.38	0.95	0.7	2.21	0.85	1.43
	c114105f1p04796	-5.31	6.19e-06	0.00055	1.59	4.5	9.38	7.07	6.23	3.99	6.78	0.81	0.43	0.88	0.68	2.51	0.71	1.42
	c11411f1p01545	-5.08	4.48e-05	0.0093	17.36	45.3	51.11	49.08	82.08	2.98	47.72	0.43	0.36	0.39	11.5	22.82	5.73	17.02
	c114120f1p04714	-4.8	6.22e-06	0.00117	1.03	6.36	8.72	7.37	5.32	4.01	8.28	0.92	0.52	0.98	0.9	2.77	0.66	1.81
	c11412f2p01506	-9.09	2.73e-06	0.01	0.79	1.84	2.4	2.7	2.85	3.02	2.22	0.17	0.07	0.05	0.1	0.55	0.08	0.72
	c114139f1p04687	-6.49	6.86e-06	0.00419	1.17	10.02	8.65	3.05	3.25	9.64	6.18	0.4	0.19	1.01	0.35	2.49	0.23	1.8
	c114149f1p04838	-6.36	3.76e-06	0.00448	0.56	2.66	3.33	3.33	3.84	3.66	6.09	0.4	0.41	0.62	0.35	0.77	0.35	0.79
	c114150f1p04684	-5.76	3.39e-05	4.75e-05	6.27	44.37	33.18	31.05	43.45	28.17	29.68	2.95	1.84	5.02	3.94	11.73	3.04	8.99
	c114154f1p04628	-5.48	1.81e-05	0.00153	3.93	13.36	14.07	17.82	31.02	24.3	12.24	1.18	1.18	2.69	2.94	6.39	2.04	4.86
	c114164f1p04711	-5.28	3.55e-06	0.00844	0.51	3.46	3.23	3.43	4.17	3.89	4.6	0.4	0.19	0.57	0.66	1.26	0.31	1.03
	c114171f1p02383	-4.5	3.76e-06	0.00953	1	4.66	3.88	4.94	4.6	4	2.86	0.7	0.42	0.76	0.56	1.7	0.51	1.1
	c114192f1p04402	-4.39	0.000163	0.000166	35.82	167.13	221.36	229.41	178.33	179.69	123.89	11.18	14.8	36.48	39.4	71.31	23.55	61.98
	c114202f1p14225	-5.33	3.16e-06	0.01	0.46	4.27	4.95	2.8	3.43	3.04	1.84	0.22	0.05	0.93	0.58	1.37	0.25	0.5
	c11420f1p22027	-3.61	2.23e-05	0.00584	11.63	40.1	28.77	24.17	11.85	31.72	17.79	2.58	1.43	3.39	6.89	20.03	5.13	6.55
	c114221f1p03698	-4.63	1.34e-05	6.87e-05	2.56	12.69	14.65	14.58	15.56	14.83	14.98	1.48	0.88	2.54	2.17	6.83	1.3	4.19
	c11422f2p1751	-5.35	3.11e-06	0.01	0.73	1.15	3.65	4.68	4.69	2.75	2.59	0.17	0.3	0.7	0.2	1.43	0.17	0.82
	c114248f1p04741	-4.87	5.23e-06	0.00208	1.98	9.03	4.62	3.94	6.86	4.68	3.16	0.5	0.38	0.81	1.51	2.06	0.56	1.21
	c114265f1p14833	-7.9	1.45e-05	0.00187	5.47	14.49	7.99	6.64	23.36	20.17	7.01	0.78	0.58	1.73	1.1	2.84	1.67	2.07
	c114283f1p43649	-5.41	1.92e-05	0.00114	3.07	29.63	26.84	18.43	13.14	15.85	17.49	1.36	0.28	2.55	1.87	8.84	1.5	6.59
	c114284f1p04362	-5.76	2.8e-05	1.94e-05	6.21	24.5	31.21	24.42	37.63	28.11	25.98	2.42	1.44	4.42	4.18	8.39	3.22	6.84
	c11428f1p1950	-7.13	9.51e-06	0.00645	2.13	4.2	11.39	12.39	11.15	14.24	1.76	0.75	0.47	1.04	1.1	0.7	0.57	3.41
	c114290f1p04565	-5.24	1.27e-05	2.83e-05	2.67	12.54	14.85	11.91	15.83	11.65	12.77	1.37	1.03	2.13	1.55	5.4	1.42	2.77
	c114294f1p05193	-6.91	2.79e-06	0.01	0.58	2.59	2.99	2.41	3.26	2.81	2.48	0.3	0.21	0.39	0.33	0.48	0.29	0.48
	c114295f1p04320	-6.75	2.93e-06	0.01	0.51	3.08	4.61	2.16	2.15	2.85	2.75	0.33	0.15	0.24	0.38	0.92	0.31	0.35
	c114319f1p02885	-4.62	3.81e-06	0.00833	0.87	3.34	3.17	3.36	6.52	2.33	5.83	0.37	0.19	0.77	0.88	1.57	0.82	0.92
	c114321f1p34508	-6.03	3.16e-06	0.01	0.69	2.04	3.74	4.77	1.23	1.96	5.08	0.4	0	0.57	0.26	0.81	0.64	0.56
	c114322f1p04449	-5.34	2.06e-05	3.23e-05	4.03	25.58	21.78	17.97	24.46	17.45	22.2	1.96	1.31	4	2.42	7.39	2.15	5.77
	c114326f1p05721	-6.81	3.57e-06	0.00509	0.52	3.92	3.34	2.77	5.03	3.22	3.22	0.23	0.18	0.54	0.33	1.03	0.36	0.57
	c114328f1p25177	-8.16	3.48e-06	0.00426	0.82	3.32	4.6	2.18	4.9	2.24	2.66	0.19	0.17	0.57	0.13	0.75	0.19	0.53
	c114344f1p15056	-4.76	3.54e-06	0.01	0.82	4.31	4.53	3.24	5.13	3.43	2.61	0.39	0.24	1.18	0.72	1.31	0.58	0.64
	c11434f1p1901	-4.12	5.96e-06	0.01	1.33	3.66	9.45	4.13	11.19	6.28	5.86	0.74	0.62	2.27	0.99	3.03	0.42	2.11
	c114373f1p14705	-6.63	3.93e-06	0.00325	0.21	2.75	3.79	5.47	5.66	3.48	2.38	0.36	0.26	0.51	0.55	0.96	0.53	0.4
	c114419f1p14601	-6.74	2.82e-06	0.01	0.7	2.56	1.29	2.76	1.45	4.44	3.96	0.18	0.19	0.33	0.44	0.31	0.14	0.96
	c114423f1p14503	-6.3	2.86e-06	0.01	0.59	3.72	2.71	1.94	3.23	3.45	2.27	0.31	0.1	0.37	0.3	0.79	0.42	0.57
	c11442f3p1525	-5.25	5.75e-05	0.00587	4.88	81.59	93.67	69.71	24.4	45.58	59.35	8.19	0.43	10.78	6.92	27.62	1.03	17.26
	c114437f1p14447	-5.44	5.62e-06	0.01	1.03	5.85	8.44	0.23	7.26	5.96	7.28	0.72	0.23	0.7	0.22	2.94	0.66	1.17
	c114447f1p04526	-5.96	3.78e-06	0.00494	0.89	5.17	3.95	2.67	3.23	2.93	5.13	0.38	0.15	0.43	0.51	1.24	0.48	0.83
	c114469f1p04847	-4.83	8.62e-06	6.42e-05	2.06	9.14	11.8	8.49	7.71	8.59	8.85	1.23	0.76	1.45	1.38	3.22	1.41	2.27
	c11446f3p0643	-5.54	2.42e-05	0.000222	4.14	30.42	12.55	28.16	25.26	25.29	30.01	2.8	0.87	4.23	4.74	7.45	1.48	6.54
	c114479f1p04518	-5.1	3.7e-06	0.00736	1.23	1.49	6.06	4.29	2.5	4.16	4.62	0.19	0.1	1.08	0.69	1.42	0.55	0.75
	c114484f1p21820	-6.79	4.86e-05	0.00241	5.4	73.16	43.38	50.71	74.33	19.34	35.52	5.16	2.4	9.65	3.68	7.23	7.24	9.06
	c114513f1p02595	-5.85	3.54e-06	0.00666	1.07	3.16	2.07	3.86	4.3	3.75	4.1	0.36	0	0.41	0.52	0.77	0.16	1.59
	c114515f1p24180	-4.35	7.85e-06	0.00017	2.72	7.91	7.73	9.67	8.04	8.84	9.47	0.68	0.27	1.83	1.64	3.79	1.23	3.07
	c114544f1p02820	-5.14	7.76e-06	0.000118	3.18	8.36	7.32	6.81	10.8	7.53	7.05	0.66	0	0.82	1.17	3.76	1.13	2.39
	c11454f1p01332	-8.58	6.23e-06	0.000338	1.1	5.86	5.74	4.37	7	3.11	8.87	0.88	0.34	0.4	0.34	0.81	0.25	1.2
	c114552f1p83857	-5.51	1.36e-05	0.000401	2	20.1	13.18	10.61	15.27	16.86	9.86	1.54	0.17	1.61	1.96	4.39	2.05	4.22
	c114556f1p05178	-6.89	3.7e-06	0.00408	0.96	3.91	2.81	2.72	5.2	4.2	2.84	0.34	0.5	0.28	0.24	1.05	0.15	0.72
	c114571f1p04506	-5.26	3.17e-06	0.01	0.86	3.3	3.81	2.88	2.34	2.87	4.67	0.38	0.25	0.76	0.28	1.09	0.32	0.86
	c114622f1p01300	-9.59	5.66e-06	0.00452	1.34	1.2	9.44	3.75	7.27	5.63	3.74	0.35	0.17	0.47	0.46	1.34	0.35	0.24
	c114624f1p04821	-6.19	1.23e-05	0.000236	2.44	10.94	17.03	12.84	16.39	7.71	9.35	1.44	0.81	0.3	2.27	4.47	0.56	2.55
	c11462f1p0585	-7.93	5.97e-06	0.00123	0.46	6.1	8.22	2.95	7.18	6.47	3.73	0.49	0.19	0.63	0.62	1.25	0.56	0.69
	c114655f1p05056	-5.46	3.28e-06	0.01	0.8	2.91	4.39	3.37	3.51	2.18	4.15	0.66	0.22	0.46	0.25	1.18	0.34	0.78
	c114675f1p04189	-6.12	6.36e-06	0.000228	1.38	7.12	7.65	4.32	7.97	5.05	6.67	0.61	0.16	1.12	0.67	2.06	0.62	1.32
	c114680f1p0665	-4.08	2.17e-05	0.00481	5.96	24.84	42.89	17.35	17.88	27.07	19.08	3.85	0.34	5.37	4.16	14.22	3.01	7.05
	c114681f1p04279	-6.2	1.11e-05	0.000235	1.52	9.64	7.66	9.07	14.23	14.29	12.55	0.99	0.52	1.71	1	3.87	1.01	2.02
	c114719f1p04815	-6.13	5.53e-06	0.000567	1.41	4.36	6.51	4.5	7.36	6.42	4.25	0.73	0.35	1.26	0.7	0.89	0.55	1.2
	c11471f1p0729	-5.91	2.96e-06	0.01	0.5	4.52	4.16	2.41	1.04	3.6	2.67	0.23	0.61	0.42	0.31	0.79	0.34	0.49
	c114732f1p64690	-5.25	4.97e-06	0.0017	0.84	4.69	6.46	7.12	3.68	3.68	6.31	0.62	0.43	1.26	0.84	1.99	0.81	0.3
	c11473f5p1572	-6.35	3.73e-05	0.00365	5.45	20.27	23.68	44.87	64.47	47.46	26.2	2.85	1.56	3.3	5.72	8.08	4.5	10.58
	c114744f1p04767	-4.42	1.81e-05	0.000235	4.42	18.9	20.74	23.85	22.26	12.74	21.49	2.42	1.43	3.26	2.79	10.88	1.83	5.56
	c114750f1p44549	-9.42	4.23e-06	0.01	0.46	4.91	3.04	2.53	1.75	3.43	8.13	0.24	0.15	0.83	0.15	0.47	0.42	0.32
	c114795f1p04684	-4.43	1.23e-05	0.000227	2.68	14.98	14.96	8.44	15.95	12.2	14.98	1.43	1	3.02	1.8	6.16	1.85	3.73
	c114804f1p05029	-7.32	3.36e-06	0.00589	0.38	2.22	4.6	4.49	1.36	4.16	3.17	0.64	0.11	0.4	0.15	0.86	0.16	0.46
	c114811f1p15095	-5.8	2.05e-05	1.84e-05	3.48	18.45	22.83	18.53	22.71	21.84	21.72	2.32	1.17	3.32	2.58	6.21	2.21	4.52
	c11484f7p1968	-6.03	9.64e-06	0.00212	1.04	8.04	17.11	10.18	6.76	7.68	9.75	1.25	0	2.26	1.46	2.22	0.69	2.17
	c114852f1p13753	-5.36	3.3e-06	0.01	1.25	4.99	2.62	3.59	3.02	2.5	3.48	0.59	0.39	0.42	0.91	0.71	0.42	0.56
	c11486f3p21513	-5.86	1.34e-05	0.00134	1.64	10.2	11.54	8.41	20.17	18.06	14.79	0.69	2.81	5.11	2.71	0.11	1.37	1.66
	c114885f1p04559	-5.76	5.14e-06	0.00105	1.39	5.83	5.7	3.88	5.9	5.46	4.64	0.57	0.49	0.42	0.6	1.78	0.47	1.37
	c114886f1p05056	-5.55	3.04e-06	0.01	0.54	3.11	3.76	2.35	2.98	3.43	3.43	0.15	0.27	0.49	0.12	1.55	0.35	0.61
	c114915f1p03262	-4.95	9.58e-06	0.0019	1.63	8.93	15.48	7.07	9.35	7.49	13.59	0.83	0.55	1.23	1	4.51	1.04	3.67
	c11491f6p1580	-5.31	2.79e-05	0.000333	3.33	25.71	37.08	25.2	42.17	24.51	25.41	1.81	4.06	3.26	3.72	9.13	4.52	8.06
	c114920f1p14374	-9.49	4.61e-06	0.00529	0.13	5.36	8.13	3.21	3.69	2.56	3.37	0.15	0.08	0.35	0.29	0.89	0.22	0.81
	c11492f1p01969	-5.98	4.87e-06	0.00134	0.73	6.66	3.72	3.92	6.44	4.14	5.34	0.49	0.12	0.96	0.67	1.18	0.5	1.27
	c114936f1p05251	-5.08	9.52e-06	0.000157	2.51	7.13	9.64	11.43	13.78	7.1	10.26	0.67	0.5	1.39	2.16	2.58	1.26	3.61
	c11493f2p1742	-6.69	5.39e-06	0.000508	0.75	6.09	5.27	3.75	6.82	3.17	6.58	0.23	0	0.31	0.5	1.45	0.62	1.74
	c11494f1p11401	-5.03	1.08e-05	0.000124	1.51	10.9	14.12	10.68	12.61	11.44	9.23	1.17	1.2	2.06	1.22	3.9	1.72	2.75
	c114975f16p2889	-5.41	6.81e-06	0.01	0.62	8.58	9.58	1.45	11.35	5.12	7.51	0.47	0.63	2.13	2.35	1.4	0.28	0.93
	c114999f4p2862	-4.28	1.28e-05	0.00782	2.35	7.44	19.42	19.86	19.31	13.29	8.06	1.94	1.04	0.79	1.64	5.37	2.7	7.45
	c115024f2p11556	-9.23	4.51e-06	0.00517	0.83	1.78	5.93	5.21	6.56	4.43	1.16	0.56	0.65	0.29	0.38	0.37	0.05	0.5
	c115082f3p4913	-6.47	1.95e-05	0.00246	1.71	16.14	31.3	9.41	20.02	22.53	19.64	1.19	0	2.99	0.08	9.15	1.09	4.17
	c115130f2p11917	-5.35	4.25e-05	0.000113	9.63	59.81	32.04	39.66	48.62	53.66	32.24	3.41	2.1	6.24	6.67	12.15	6.11	14.84
	c115180f2p14910	-5.72	1.26e-05	0.00469	2.12	4.45	16.81	8.28	17.36	19.48	11.46	1.39	1.82	1.96	0.94	3.59	1	3.29
	c115184f1p01723	-15.78	4.24e-06	0.01	0.05	6.23	0.17	5.92	4.68	4.24	1.77	0.24	0.06	0.61	0.17	0.1	0.24	0.03
	c115209f1p34814	-6.5	8.75e-06	0.000724	1.2	7.99	8.59	8.84	12.98	9.99	4.17	0.76	0.44	1.63	0.82	1.8	1.36	1.48
	c11520f3p3692	-14.24	5.28e-06	0.00972	0.27	3.5	3.75	3.81	10.37	2.39	5.02	0.3	0.32	0.11	0.32	0.36	0.48	0.15
	c115220f1p1806	-3.94	7.97e-06	0.00169	2.74	8.82	4.3	12.76	10.64	9.59	8.11	0.36	1.11	1.41	1.48	4.52	1.5	4.08
	c115228f3p0920	-6.4	3.16e-05	0.000731	2.6	30.53	38.44	23.68	44.68	17.7	40.95	3.32	2.31	6.5	3.97	7.91	2.26	4.75
	c11523f3p41519	-8.56	3.76e-06	0.00271	0.48	4.79	3.7	3.69	2.98	2.27	4.39	0.25	0.29	0.4	0.49	0.49	0.38	0.3
	c11524f1p01502	-5.14	4.42e-06	0.00334	0.88	2.61	5.23	5.27	6.72	5.47	3.04	0.69	0.15	0.88	0.97	1.24	0.74	1.02
	c115267f2p1880	-4.74	2.9e-05	0.01	5.01	45.32	13.29	35.9	50.43	27.45	18.64	3.24	1.91	4.99	0.42	17.48	4.63	8.64
	c115285f3p2512	-4.56	0.000128	0.00954	19.06	158.26	112.17	153.28	260.71	110.48	72.2	22.97	6.51	23.04	23.95	50.49	9.1	58.47
	c11529f1p5739	-6.05	7.67e-06	0.000615	0.5	7.48	8.95	10.85	5.95	5.95	8.06	0.73	0.75	0.92	1.3	1.78	0.11	2.29
	c11531f1p0867	-9.13	2.89e-06	0.00835	0.32	1.6	2.33	2.89	4.36	3.18	2.24	0.43	0	0.35	0.34	0.29	0.14	0.3
	c11532f1p0972	-13.25	2.52e-06	0.01	0.28	2.85	1.48	2.02	3.5	0.43	3.57	0.09	0	0.08	0	0.51	0.13	0.26
	c115357f1p0851	-5.68	4.27e-05	0.000153	7.3	35.13	42.58	38.32	66.48	44.65	39.2	5.26	1.59	5.02	5.91	15.68	4.58	10.17
	c11535f1p11511	-5.88	0.000729	8.46e-05	106.96	933.52	859.61	881.23	774.19	576.84	527.72	49.74	50.59	99.31	96.69	246.38	62.82	187.17
	c115361f2p14994	-5.92	6.76e-06	0.000763	1.51	6.8	6.59	3.25	10.32	5.75	7.96	0.71	0.74	1.06	0.58	2.76	0.46	0.81
	c115383f2p1986	-5.82	4.48e-05	0.00469	5.31	78.43	30.89	67.11	42.71	29.12	33.27	6.67	2.95	13.44	3.55	9.9	1.35	11.42
	c115398f1p01391	-11.02	4.37e-06	0.000827	0.44	3.47	2.09	3.93	3.92	3.72	6.73	0.17	0	0.31	0.15	0.97	0.2	0.39
	c115419f2p31103	-6.29	9.47e-06	0.000164	1.58	9.75	10.86	8.71	13.03	5.63	8.82	1.29	0.2	1.65	0.54	2.7	0.53	2.38
	c11544f12p2948	-3.37	7.1e-06	0.01	0.97	8.41	7.61	10.71	12.9	8.74	5.72	1.19	0.35	1.92	2.2	3.32	1.01	6.34
	c115455f4p1792	-5.49	1.29e-05	0.000426	2.55	10.73	14.03	16.57	16.87	10.46	11.41	0.95	0.14	1.43	1.97	8.25	1	1.3
	c11549f1p0715	-7.17	2.29e-05	0.000125	2.2	23.07	29.77	18.61	29.02	18.78	17.87	1.69	1	1.02	3.34	3.71	1.37	7.3
	c115540f2p04600	-6.84	3.59e-06	0.00486	0.76	3.42	4.17	3.74	4.05	3.06	2.93	0.14	0.34	0.46	0.89	0.59	0.22	0.6
	c11554f1p11051	-10.48	2.83e-06	0.00763	0.7	3.79	1.79	0.97	3.12	3.55	2.25	0.04	0.11	0.14	0.78	0.08	0.2	0.2
	c11556f5p31197	-6.06	1.65e-05	0.00051	2.69	18.4	10.73	17.41	22.65	11.88	19.86	1.19	0.37	2.28	1.74	8.78	1.15	1.59
	c11557f1p01070	-5.47	3.12e-06	0.01	1.12	3.56	3.64	2.15	3.3	3.87	2.47	0.67	0	0.64	0.63	1.08	0.04	0.62
	c11558f1p1823	-5.68	1.08e-05	0.000118	1.68	11.59	14.91	11.59	9.35	8.22	11.32	1.43	1.09	2.3	0.63	3.42	1.41	1.81
	c115604f3p4878	-4.48	8.79e-06	0.000327	2.92	5.9	10.65	11.21	13.17	8.46	7.1	1	0.25	1.89	2.03	4.41	1.23	2.45
	c11560f3p01649	-4.89	6.08e-06	0.00149	1.11	8.72	8.66	4.96	7.03	5.35	4.04	0.38	0.07	1.01	1.35	2.71	0.96	1.68
	c115610f1p01113	-8.53	6.24e-06	0.01	0.17	9.68	6.28	2.69	2.15	6.4	9.21	0.4	0	1.07	0.63	0.39	1.06	0.73
	c115638f6p6744	-5.05	4.04e-06	0.01	1.97	6.75	0.58	3.54	5.58	5.37	2.43	0.11	1.05	0.61	0.9	1.55	0	0.97
	c11565f1p0748	-5.39	1.31e-05	3.58e-05	3.06	9.23	13.84	12.61	16.28	14.7	14.07	2.23	0.45	2.42	1.39	5.18	0.94	2.94
	c11566f2p0788	-6.68	5.54e-06	0.00105	0.82	5.27	2.2	5.92	7.99	5.77	5.46	0.32	0	1.15	0.57	1.36	0.11	1.5
	c115688f1p1680	-5.03	4.61e-06	0.01	0.13	6.09	6.97	6.64	4.98	2.22	3.26	0.37	0.33	2.44	0.98	0.61	0.85	0.45
	c1156f8p2926	-4.67	1.5e-05	0.000543	3.97	21.16	15.74	16.37	15.66	10.88	17.11	1.4	0.36	2.45	1.61	11.08	1.39	3.33
	c115706f2p52283	-6.18	5.61e-06	0.00796	0.72	7.89	7.83	3.32	6.46	7.25	1.34	0.37	0.1	1.03	0.39	1.09	0.55	2.11
	c11571f3p01139	-5.26	2.18e-05	5.45e-05	5	19.47	20	21.19	32.29	24.46	19.88	1.87	1.28	5.78	4.51	6.82	1.75	5.05
	c115747f2p51675	-5.89	1.04e-05	0.01	2.3	9.82	7.83	9.56	22.17	10.28	3.89	0.55	0.33	1.04	1.11	4.14	0.94	3.06
	c115754f2p11649	-5.96	8.1e-06	0.0075	1.39	12.62	4.81	3.2	11.32	6.36	11.3	0.91	0.48	1.01	0.81	4.31	0.81	0.22
	c115759f5p51142	-3.85	5.89e-05	0.000951	15.78	66.5	99.59	57.41	61.72	75.91	54.66	9.21	4.61	23.94	13.63	39.62	3.64	17.46
	c115761f3p21336	-9.84	2.38e-05	2.7e-05	2.82	20.36	18.24	22.11	29.23	17.45	26.62	1.03	0.92	1.3	2.78	3.16	1.55	3.15
	c115767f3p01639	-5.32	7.26e-06	0.000207	1.51	9.2	5.99	7.43	6.62	5.73	9.92	0.72	0.55	1.85	0.82	1.97	0.94	1.88
	c11576f1p01711	-8.61	1.26e-05	0.000276	1.23	10.51	9.85	10.45	17.42	8.21	16.13	0.73	0.26	0.97	1.61	2.8	0.19	2.01
	c115778f2p1688	-4.38	2.79e-05	0.000943	5.72	47.01	26.51	29.27	35.3	22.09	28.42	0.43	1.49	5.95	8.38	14.09	4.68	9.37
	c11577f1p01008	-8.08	3.1e-06	0.0092	0.18	2.92	3.72	0.47	4.88	2.74	3.17	0.5	0.11	0.08	0.3	0.25	0.25	0.76
	c11579f1p11475	-5.94	1.06e-05	0.00133	2.86	11.62	6.94	4.95	17.07	9.81	13.55	0.45	0.23	2.97	0.96	3.86	0.48	2.3
	c115805f1p0619	-4.4	6.55e-06	0.0015	1.63	8.67	6.29	6.66	6.91	8.46	6.95	0.41	0.36	0.37	2.28	4.8	1.14	0.99
	c115809f1p01333	-5.2	3.23e-05	0.00926	8.2	10.66	12.23	45.65	41.21	49.88	42.1	1.98	2.02	3.46	8.26	12.65	2.84	9.17
	c115811f2p3856	-6.07	3.9e-05	0.00632	5.58	70.49	22.43	16.2	38.59	50.8	41.9	2.3	1.96	8.76	5.13	12.37	4.32	5.7
	c115828f2p71544	-5.2	9.08e-05	0.00675	16.53	175.74	99.8	94.79	52.68	108.57	49.82	9.24	1.88	20.97	10.69	31.14	6.86	34.21
	c115878f3p01053	-4.86	8.75e-06	0.00237	2.01	5.76	5.07	10.67	12.57	8.91	13.07	1.15	0.85	2.01	0.99	4.95	0.67	1.32
	c11589f1p01500	-6.21	3.6e-06	0.00551	0.86	3.35	1.92	3.29	4.03	5.33	3.61	0.11	0.15	0.4	0.2	1.38	0.58	0.79
	c115906f2p21791	-7.98	4.78e-06	0.00343	0.15	3.77	4.67	4	6.33	2.23	6.9	0.16	0.19	0.08	0.04	2.45	0.28	0.32
	c115922f1p2893	-4.17	6.58e-06	0.00655	2.88	11.26	10.99	3.41	3.95	7.73	5.92	0.89	1.88	0.42	3.42	2.32	0.98	1.15
	c11595f1p0824	-4.23	1.08e-05	0.000116	4.33	10.47	12.9	15.61	9.59	11.5	10.24	1.32	1.76	2.93	0.36	7.29	1	2.98
	c115983f3p31615	-4.81	1.03e-05	0.01	1.25	17.18	18.59	5.19	8.59	9.83	8.69	1.76	0.76	2.67	2.58	3.84	1.11	1.69
	c115996f3p11557	-4.66	4.58e-06	0.01	0.59	3.45	7.86	4.73	4.77	6.81	2.5	0.67	0.29	0.1	0.14	2.54	0.37	2.47
	c11599f1p01502	-5.15	8.67e-06	0.000101	1.7	8.27	8.84	7.57	10.78	7.57	11.29	1.1	0.56	1.35	1.01	3.24	1.42	2.2
	c116008f2p5643	-10	0.000128	0.00386	0.86	100.96	224.79	99.59	78.31	79.31	160.6	10.41	3.3	22.7	13.87	2.83	3.36	17.96
	c11600f1p0752	-9.37	1.88e-05	4.36e-05	4.01	12.61	23.1	18.35	23.85	13.15	13.06	0.28	0.3	0.5	1.67	5.58	0.77	2.45
	c116029f1p21940	-4.53	4.36e-06	0.00494	0.71	4.55	4.61	5.4	4.35	5.04	5.37	0.47	0.46	1.21	0.57	2.38	0.6	0.93
	c11602f1p01363	-6.62	3.57e-06	0.00547	0.28	3.33	5.76	3.59	3.49	2.76	3.1	0.19	0.26	0.23	0.4	0.95	0.38	0.95
	c116037f2p01218	-6.24	8.14e-06	0.00858	2.34	11.67	5.33	10.11	3.21	13.83	3.77	0.89	0.64	0.62	1.47	1.36	0.75	2.32
	c116040f1p01427	-7.5	4.89e-06	0.000744	0.82	5.94	3.26	2.78	5.27	6.34	4.95	0	0.31	1.19	0.05	1.7	0.31	0.35
	c116050f1p41352	-26.11	1.03e-05	0.00762	2.24	6.65	0.21	11.78	13.77	15.28	4	0.8	0.08	0.06	0.22	0.12	0.71	0.08
	c116061f1p4728	-7.23	1.91e-05	0.00363	1.77	15.24	12.89	26.95	32.39	16.31	10.5	3.28	1.85	2.08	2.86	3.98	0.51	1.48
	c11606f1p0985	-13.7	9.49e-06	0.000188	1.58	10.16	3.21	7.52	10.06	12.27	7.16	0.47	0.11	0.46	0.38	1.42	0.34	0.62
	c1160f35p7972	-5.94	0.000275	0.000406	40.29	171.96	242.19	264.78	429.74	256.76	343.25	24.22	13.14	54.62	63.65	39.99	32.33	66.57
	c11612f1p01478	-7.39	3.68e-06	0.01	1.06	1.5	0.93	5.54	3.17	3.67	5.9	0.03	0.32	0.93	0.7	0.3	0.12	0.55
	c116148f3p11428	-4.9	3.66e-06	0.00906	0.13	4.13	4.96	3.65	3.36	4.93	3.6	0.41	0.08	0.58	1.04	1.22	0.96	0.76
	c11614f1p01182	-5.36	6.11e-06	0.00045	1.01	4.97	5.35	7.64	8.18	5.93	6.79	0.28	0.38	1.34	0.56	2.93	1.12	0.82
	c116170f3p23039	-5.23	1.34e-05	3.58e-05	2.63	13.91	14.8	14.57	13.51	10.48	16.5	1.43	0.63	2.46	1.66	5.08	1.87	3.36
	c116183f1p01318	-10.45	3.17e-06	0.00788	0.42	1.44	1.2	3.57	5.51	3.33	2.3	0.09	0.17	0.29	0	0.37	0.16	0.62
	c116185f6p21008	-4.35	6.26e-06	0.000796	2.19	5.67	9.44	6.17	9.37	5.34	5.51	1.25	0.44	0.9	1.18	3.03	0.74	2.5
	c116214f5p21012	-11.14	8.59e-06	0.00164	2	5.14	13.26	10.3	5.36	2.59	9.75	0.62	0.11	0.07	1.62	1.23	0.29	0.41
	c11621f1p0434	-8.17	3.52e-06	0.00406	0.42	5.19	2.99	2.34	2.03	4.13	3.84	0.39	0.52	0.35	0.17	0.19	0.48	0.47
	c116254f2p11542	-9.08	7.89e-06	0.000559	0.36	7.76	8.61	4.08	10.38	8.86	5.5	0.05	0.22	1.52	0.05	0.43	1.21	1.53
	c116268f1p52825	-6.04	4.34e-06	0.00536	0.75	3	2.4	4.66	7.49	5.42	3.1	0.33	0.4	0.27	0.34	1.05	0.38	1.67
	c116276f8p6844	-3.59	7.71e-06	0.0083	4.34	4.91	12.1	15.26	8.63	5.22	7.22	0.49	1.32	3.67	2.55	5.27	0.59	2.18
	c116282f1p2934	-4.72	4.28e-06	0.00439	1.79	2.62	2.96	7.39	3	5.07	5.71	0.32	0	1.06	1.61	2.06	0	1
	c1162f2p01012	-5.12	8.73e-06	0.00351	1	3.25	9.68	8.61	11.56	10.07	13.02	1.12	1.22	1.34	2.42	3.1	0.86	1.12
	c116302f1p01956	-4.62	3.97e-06	0.01	0.92	2.78	4.7	4.14	4.99	1.59	7.46	0.5	0.51	0.68	0.82	1.12	0.42	1.7
	c11630f6p21163	-4.58	6.29e-05	0.00731	13.67	50.84	90.97	69.05	38.38	51.87	115.11	8.1	2.12	9.51	5.95	42.24	12.22	13.79
	c11631f1p01233	-5.2	3.85e-06	0.00565	0.82	4.2	3.03	2.57	7.03	4.02	3.03	0.27	0.36	0.61	1.14	1.07	0.34	0.96
	c11632f1p1970	-13.99	3.64e-06	0.0067	0.57	3.21	6.09	3.9	3.12	0.14	2.86	0.04	0.12	0.31	0.23	0.17	0.13	0.42
	c116334f1p02880	-5.66	2.96e-05	0.000105	5.18	27.49	38.24	20.65	36.82	27.74	33.11	2.85	1.87	3.16	2.41	12.91	3.19	7.02
	c11634f2p0573	-5.24	9.58e-06	0.000595	1.28	7.87	13.6	6.85	9.46	11.56	11.65	1.46	0.2	1.72	0.78	3.75	0.65	3.32
	c116365f14p62071	-4.88	7.91e-05	0.00147	15.26	56.82	80.18	83.49	57.32	108.59	125.47	7.72	3.19	20.03	13.33	39.56	8.91	15.28
	c116366f1p0848	-5.57	4.5e-06	0.01	0.43	2.86	1.7	3.83	6.39	5.7	7.54	0.3	0	0.18	0.53	1.46	0.88	1.76
	c116368f11p31163	-5.2	9.06e-06	0.00265	1.03	9.09	13.52	10.58	12.35	8.18	4.54	0.65	0.29	1.11	0.51	4.62	1.36	2.87
	c11639f2p0449	-4.06	7.3e-06	0.00511	2.44	10.74	9.26	11.97	6.69	3.97	6.46	0	0.5	1.84	0.82	5.31	1.38	2.84
	c116406f4p2962	-4.19	0.000133	0.00453	25.7	133.37	181.69	123.43	76.67	221.12	174.57	10.54	8.62	34.4	16.33	66.81	15.38	71.65
	c11640f11p1910	-5.78	6.08e-06	0.000371	0.61	5.53	6.03	7.43	4.99	7.58	6.72	0.87	0.49	0.83	0.41	2.27	0.55	1.3
	c116410f4p3972	-4.99	3.81e-06	0.01	0.28	3.21	3.71	1.67	6.22	4.68	5.14	0.65	0.23	1.95	0.54	0.43	0.68	0.53
	c116425f4p5735	-5.17	4.64e-05	0.000584	6.99	57.25	25.3	57.64	44.2	50.45	62.52	4.55	0.46	11.83	6.47	10.34	6.44	18.78
	c116447f2p1834	-5.66	2.17e-05	0.000866	3.19	22.4	34.01	15.05	20.81	25.26	18.29	1.25	0	4.26	1.42	11.38	1.59	4.67
	c116457f81p171716	-5.21	0.000187	0.000231	31.1	166.92	187.04	153.67	244.23	267.64	173.51	27.37	3.2	38.77	23.46	59.4	15.4	67.41
	c116468f29p51730	-4.55	1.6e-05	0.00374	6.58	27.04	21.51	16.1	9.03	22.01	6.51	0.31	0.45	7.44	4.69	3.82	3.19	4.01
	c116472f5p3972	-5.13	8.41e-06	0.00445	0.94	13.54	12.91	6.88	5.57	9.36	6.14	1.42	0.23	0.93	1.68	3.91	0.34	2.27
	c11650f1p0822	-6.86	5.06e-06	0.00112	0.78	3.59	5.09	4.36	3.83	4.37	8.29	0.25	0	0.83	0.36	1.81	0.1	1.06
	c116513f3p1760	-8.91	3.4e-06	0.0043	0.12	3.42	4.94	2.58	2.82	4.54	1.65	0.17	0.59	0.3	0.1	0.22	0.27	0.61
	c116522f1p21111	-10.89	1.26e-05	0.00454	0.58	1.09	14.29	13.09	19.18	11.06	12.26	0.08	0.5	1.7	1.14	0.3	0.26	2.59
	c116529f4p01081	-7.37	2.58e-05	0.000923	3.15	17.16	39.79	25.54	30.91	25.28	14.15	1.36	0.52	1.96	2.2	10.48	1.65	3
	c116558f3p01044	-5.49	1.38e-05	0.000203	1.41	16.44	17.83	12.31	12.32	12.69	16.11	1.6	0.64	1.67	1.21	6.02	1.35	3.74
	c11655f2p1967	-6.31	6.06e-06	0.00437	2.28	2.87	1.49	6.79	9.91	7.57	6.18	0.09	0.23	0.7	0.77	1.45	1.03	1.59
	c116560f14p4885	-4.8	7.88e-05	0.00402	11.53	133.42	47.46	116.58	89.47	71.44	62.36	8	5.32	15.57	13.63	38.22	3.76	26.42
	c116604f104p352054	-5.72	0.000152	0.00123	19.11	172.88	90.58	142.46	201.77	231.25	113.91	2.24	16.14	28.24	47.23	36.24	13.09	26.75
	c116606f1p01287	-6.52	3.01e-05	0.000135	7.83	30.46	17.65	34.98	28.69	43.27	21.84	1.78	1.73	1.17	2.19	7.62	3.83	9.98
	c11662f1p0704	-5.68	4.31e-06	0.00287	1.54	5.33	5.05	3.88	6	1.16	4.67	0.23	0.47	0.21	0.31	1.39	0.23	2.01
	c116649f36p214449	-6.37	2.88e-05	3.58e-05	5.49	36.82	21.28	30.91	29.72	23.02	31.33	0.94	0.58	4.31	3.97	7.4	1.78	9.06
	c11667f1p0659	-5.15	3.35e-06	0.01	0.56	4.47	2.84	3.9	5.16	3.56	1.69	0.13	0.51	0.11	0.56	0.63	0.57	1.79
	c116722f2p3940	-3.92	5.54e-06	0.00574	5.08	5.34	1.84	2.95	9.38	8.65	6.06	0.58	0.6	3.14	2.45	1.32	0.35	1.58
	c11674f4p21209	-8.63	2.8e-06	0.01	0.53	3.3	3.22	1.79	2.92	2.74	1.95	0.03	0.09	0.25	0.12	0.48	0.03	0.89
	c11675f1p1837	-6.78	9.9e-06	0.00887	1.87	13.26	16.55	8.16	10.09	10.55	0.33	1.2	0.54	0.45	1.33	2.37	1.29	1.78
	c11676f1p01093	-4.68	4.55e-06	0.00363	0.58	3.44	4.81	5.61	4.77	6.22	5.51	0.34	0.1	1.57	0.4	1.94	0.6	1.67
	c116782f3p1739	-12	1.51e-05	0.0076	1	22.76	1.76	12.08	11.6	12.52	22.76	0.45	0.61	2.25	0.71	1.46	0.45	1.11
	c116828f2p0850	-8.59	2.17e-05	5.16e-05	2.58	13.37	26.81	22.37	20.92	23.54	17.54	0.83	0.39	4.42	2.7	4.25	1.07	1.14
	c11682f1p01299	-5.26	1.37e-05	0.00796	4.23	12.89	7.63	19.86	18.84	4.02	21.52	2.38	0.94	1.04	1.14	8.05	1.27	2.09
	c116841f2p01338	-6.67	2.82e-06	0.01	0.27	2.2	4.64	3.14	2.07	3.71	1.45	0.13	0.08	0.28	0.28	0.8	0.28	0.77
	c116847f4p0770	-4.84	1.9e-05	4.22e-05	6.45	22.52	12.18	21.79	26.2	19.18	17.69	1.47	0.73	4.52	3.87	7.84	2.59	5.01
	c116857f8p2643	-3.5	1.04e-05	7.47e-05	4.72	14.56	12.57	9.36	14.12	12.88	9.51	2.15	1.22	4	3.47	4.89	2	4.48
	c11685f1p11047	-5.25	1.56e-05	0.000124	3.95	17.39	16.68	20.03	7.71	17.27	18.32	1.48	0.86	3.4	1.99	5.92	2.3	3.34
	c116885f6p31279	-4.56	7.82e-06	0.01	1.8	11.39	16.02	5.29	6.7	5.18	7.28	0.88	1.05	1.3	2.79	4.14	0.42	1.17
	c11691f2p0672	-4.35	4.74e-06	0.00363	1.23	3.35	5.58	4.23	6.38	6.98	5.17	0.69	0	0.9	1.11	2.58	0.68	1.61
	c116934f29p51001	-5.35	0.00019	0.000109	52.47	292.43	137.13	198.17	174.15	147.82	231.56	14.38	10.95	44.67	24.37	69.42	14.89	52.06
	c116937f241p191479	-33.02	2.42e-06	0.01	0.12	2.46	4.09	0.64	0.6	1.77	2.81	0.11	0	0.15	0	0.06	0.06	0
	c116944f14p21140	-8.7	1.54e-05	0.00434	2.25	27.28	7.95	15.61	19.29	10.86	6.93	0.66	0.49	3.64	1.17	1.74	0.87	1.8
	c11694f1p0470	-4.49	3.45e-06	0.01	2.15	3.32	3.99	4.46	3.22	3.52	2.66	0.36	0.24	0.97	0.16	1.94	0.44	1.09
	c116958f23p6838	-5.27	9.54e-05	0.00064	6.79	92.79	94.1	141.2	86.56	83.91	122.12	10.48	4.54	16.43	10.29	41.01	15.61	20.71
	c11698f1p11876	-5.52	1.2e-05	3.16e-05	2.59	13.09	12.66	8.99	15.22	12.4	11.53	0.96	1.07	2.01	1.9	3.56	0.88	3.47
	c116f14p81327	-6.14	5.92e-06	0.00172	0.97	6.15	5.99	5	2.76	9.37	6.4	0.54	0.93	1.26	0.79	1.06	0.66	0.74
	c117082f2p41306	-9.38	5.51e-06	0.00798	0.28	2.52	3.64	3.47	10.03	6.13	5.64	0.32	0	0	0.74	1.01	0.95	0.35
	c11708f1p0808	-6.27	6.13e-06	0.01	1.25	2.36	12.5	7.37	5.31	4.95	4.3	0.78	0.28	0.75	0.37	1.74	0.57	1.59
	c117105f9p397169	10.22	-6.02e-05	6.68e-15	17.49	2.34	0.56	1.21	0.42	2.62	2.29	50.64	42.54	46.84	31.94	28.01	39.34	36.05
	c117151f5p26243	-6.72	1.03e-05	0.0017	1.35	9.38	14.01	2.91	13.28	12.4	9.75	1.01	0.45	0.45	0.82	2.83	1.06	2.77
	c117168f2p1673	-7.18	2.12e-05	3.89e-05	2.19	20.61	20.37	25.03	23.04	21.54	15.7	1.62	1.33	1.58	1.66	5.78	1.36	4.58
	c117182f5p6712	-3.15	1.59e-05	0.00451	6.46	22.4	28.58	11.31	29.04	18.42	13.47	4.82	6.45	5.74	6.48	7.67	3.74	6.28
	c11719f8p2592	-10.49	3.47e-05	0.00114	3.26	37.49	26.58	17.6	47.07	48.27	18.32	2.41	0.76	1.28	3.14	2.24	4.77	4.34
	c11720f2p0779	-4.73	7.79e-06	0.00185	2.01	6.9	13.16	5.47	6.96	6.38	11.06	0.54	0.72	1.85	0.76	3.61	1.07	2.44
	c117215f4p35874	-5.81	7.4e-05	2.13e-05	12.1	85.6	72.81	83.11	63.99	75.15	78.83	6.72	3.09	18.31	11.14	16.29	4.74	20.95
	c117221f6p31157	-5.87	9.28e-06	0.00214	1.51	5.98	12.44	8.63	11.2	13.8	4.91	0.22	0.48	1.37	1.48	4.06	0.22	2.13
	c117237f4p06149	-4.6	3.51e-06	0.01	0.99	1.64	2.28	6.3	4.72	3.08	4.48	0.27	0.24	1.47	0.48	0.56	0.64	1.44
	c117246f1p126196	4.54	-2.92e-05	1.75e-05	18.92	1.12	0.79	4.77	0.33	5.56	2.08	28.1	26.41	19.41	20.76	12.97	23.83	20.74
	c117249f3p5956	-5.19	7.3e-05	0.000139	11.72	81.71	101.95	62.64	68.77	85.1	68.42	3.9	2.22	20.97	15.25	32.32	5.95	11.98
	c1172f11p1655	-5.49	6.28e-05	1.75e-05	11.51	58.24	79.33	69	66.02	65.54	56.88	8.7	5.13	10.41	10.12	19.19	6.35	14.2
	c117311f2p05848	-9.63	5.05e-06	0.00302	0.34	5.53	3.35	6.03	5.31	6.94	1.28	0.11	0.08	0.83	0.62	0.16	0.44	0.76
	c117316f2p06135	-8.21	5.99e-06	0.000683	1.14	9.39	5.6	5.15	6.52	3.38	3.76	0.89	0.24	0.62	0.38	0.84	0.22	1.08
	c117322f9p61295	-4.21	5.45e-05	0.000374	16.18	54.49	85.26	50.83	51.89	74.3	49.7	7.02	4.5	18.3	9.89	33.28	2.92	14.88
	c117355f2p16107	-5.83	7.29e-06	0.000597	1.2	7.16	6.4	4.67	7.92	6.96	11.25	0.76	0.35	0.8	0.5	2.64	0.55	2.21
	c11736f2p0761	-6.18	1.22e-05	2.7e-05	2.04	12.69	9.62	13.97	11.7	13.17	11.81	0.77	0	1.68	2.14	2.81	1.52	3.22
	c117374f2p15834	-6.8	2.01e-05	0.000128	2.6	18	26.7	22.64	21.79	20.24	11.29	1.05	0.21	4.36	2.14	4.49	2.16	3.72
	c117399f2p06048	-6.64	5.58e-06	0.000417	0.68	7.59	6.35	3.3	5.08	5.04	5.63	0.62	0.31	0.3	0.81	1.56	0.3	1.16
	c11739f8p2707	-5.31	3.88e-06	0.00735	0.26	3.68	6.33	5.36	4.1	2.54	2.56	0.47	0.48	0.43	0.53	1.64	0.12	1.02
	c117412f2p117132	-5.71	1.53e-05	5.64e-05	2.6	14.75	20.39	15.26	18.08	11.69	14.05	1.45	0.91	2.79	1.5	5.1	1.61	3.58
	c11742f1p01288	-5.84	6.47e-06	0.000236	1.14	7.27	8.97	6.2	6.07	5.36	6.37	0.72	0.17	0.47	1.04	2.38	0.71	1.6
	c117434f1p38149	-5.18	1.03e-05	0.000176	2.1	10.02	14.71	7.02	12.22	11.15	9.85	1.45	0.79	1.55	1.7	3.84	1.58	2.03
	c117443f4p3966	-10.37	6.3e-06	0.00144	0.85	8.24	3.88	2.24	4.82	7.27	8.33	0.17	0.46	0.39	1.69	0.17	0.39	0.16
	c117469f2p07094	-5.17	4.92e-06	0.00188	0.88	6.62	4.72	4.66	6.02	5.13	4.49	0.71	0.47	0.78	1.01	1.62	0.45	1.25
	c117488f2p21305	7.76	-7.54e-05	0.00028	32.12	5.05	0.11	1.97	0.1	3.6	3.09	72.09	40	90.47	38.17	27.57	27.01	62.03
	c117496f5p21529	-8.19	3.98e-06	0.00209	0.84	5.56	4.25	4.51	0.99	4.24	3.18	0.36	0.07	0.35	0.24	0.7	0.65	0.5
	c117500f2p17575	-5.67	3.88e-06	0.00476	1.1	3.24	3.02	3.78	5.73	4.04	3.88	0.53	0.06	0.32	0.37	1.52	0.57	0.99
	c117504f2p36556	-5.75	8.01e-06	9.78e-05	1.41	8.32	7.61	6.62	10.91	6.75	8.49	0.52	0.32	1.17	1.28	2.91	1.09	1.42
	c117507f2p45826	-7.59	3.1e-05	0.000875	6.18	19.72	26.2	29.17	18.97	33.7	50.78	2.12	1.06	1.94	1.75	3.16	2.09	12.21
	c117513f2p51786	-5.04	8.81e-05	0.000175	23.76	95.08	60.66	76.78	137.86	90.38	97.24	8.58	8.46	7.25	7.5	39.3	13.68	30.6
	c117527f2p05564	-4.66	4.24e-06	0.00525	1.73	3.61	6.77	5.12	2.56	2.13	6.35	0.42	0.32	0.94	0.31	2.88	0.16	1.03
	c117540f1p05636	-7.75	0.000343	0.000223	41.35	292.07	523.43	286.85	390.52	200.21	337.64	17.65	21.14	36.21	33.51	87.59	14.98	56.35
	c117546f1p35738	-4.69	5.68e-06	0.00183	0.96	7.91	5.59	3.46	8.34	5.87	5.65	0.68	0.54	1.12	0.88	2.15	0.66	2.02
	c11754f1p2962	-6.18	6.99e-06	0.000144	1.62	6.49	9.15	6.75	7.6	3.73	7.66	0.48	0.12	0.94	0.23	3.1	0.65	1.44
	c117566f1p06059	-8.42	5.09e-06	0.00654	0.74	6.34	2.52	3.51	8.28	6.34	1.9	0.21	0.18	0.25	0.29	0.98	0.66	0.93
	c117573f1p03076	-6.38	1.19e-05	0.000141	1.62	12.2	16.17	9.45	13.8	8.05	12	1.05	0.47	1.9	0.85	3.93	0.95	2.33
	c117583f1p0511	-3.43	3.92e-05	0.00322	6.66	39.36	48.58	37.6	65.63	52.41	54.68	13.03	3.95	22.23	4.08	21.85	5.37	18.41
	c117588f1p12355	-4.96	1.08e-05	0.000167	1.32	10.9	12.91	9.9	14.25	11.53	10.14	1.22	1.04	2.01	1.73	3.94	1.47	2.88
	c117597f1p12335	-5.63	3.26e-06	0.01	0.12	3.93	3.52	2	3.67	4.49	3.39	0.38	0.38	0.45	0.64	0.99	0.34	0.57
	c117604f1p42209	-5.07	7.46e-05	0.00374	20.75	109	49.29	37.09	124.48	102.64	50.36	5.99	8.11	15.79	15.15	27.76	10.15	14.41
	c11761f2p21880	-6.58	6.2e-06	0.00313	0.93	4.52	7.14	3.06	10.73	5.43	6.14	0.62	0.42	1.29	0.63	1.54	0.69	0.57
	c117622f1p06305	-7.04	5.83e-06	0.000329	1.02	6.9	8.19	3.83	5.8	4.07	4.98	0.54	0.32	0.68	0.43	1.76	0.49	0.72
	c11762f1p01534	-4.16	1.55e-05	0.000202	4.62	12.95	17.05	18.79	16.35	14.71	24.25	1.65	2.28	2.37	2.83	8.25	3.19	5.58
	c117630f1p01550	3.84	-5.51e-05	0.000908	53.48	5.58	3.2	4.5	0.9	6.41	4.67	55.78	44.11	45.04	39.01	36.77	53.25	28.51
	c117637f1p11887	-5.31	2.57e-05	2.82e-05	5.46	21.41	27.38	26.75	32.87	28.09	24.75	2.71	2.37	3.09	2.37	8.37	3.13	9.34
	c117640f1p06003	-5.6	9.15e-06	5.92e-05	1.53	8.46	8.91	8.31	8.73	9.92	11.79	0.78	0.33	1.92	1.14	2.62	1.18	2.31
	c117643f1p23798	-6.27	7.31e-06	0.00112	1.64	12.47	6.33	6.06	6.19	4.31	8.1	0.75	0.41	1.07	0.55	2.37	0.72	1.32
	c117651f1p21095	-6.55	2.26e-05	0.000768	2.32	30.02	16.27	16.96	20.92	30.25	22.31	0.91	1.11	0.96	3.69	11.41	0.82	2.32
	c117662f1p0929	2.23	-0.00319	0.01	2704.02	1040.31	308.09	2649.23	85.64	1261.52	1816.21	3397.98	1076.17	4501.77	3649.85	4807.14	1849.15	2729.27
	c117679f1p05018	-5.14	3.33e-06	0.01	0.8	3.17	4.07	3.62	3.83	3.29	3.21	0.5	0.31	0.5	0.46	1.43	0.43	0.65
	c117680f1p06124	-5.16	3.1e-06	0.01	0.62	3.06	2.8	3.15	3.6	4.01	3.18	0.42	0.35	0.36	0.52	1.07	0.39	0.85
	c117683f1p86566	-5.16	4.13e-06	0.00623	0.53	2.56	4.3	3.4	7.27	3.57	5.01	0.59	0.43	0.47	0.83	1.27	0.43	1.15
	c117687f1p06866	-5.11	3.82e-06	0.00678	0.58	4.39	5.48	3.53	3.82	3	4.65	0.59	0.4	0.83	0.3	1.42	0.35	1.09
	c117688f1p24471	-6.27	2.87e-06	0.01	0.39	3.44	2.6	1.7	3.51	2.28	4.15	0.25	0.27	0.66	0.38	0.68	0.23	0.4
	c117689f1p01916	-4.51	1.8e-05	5.99e-05	4.41	16.92	20.26	22.39	16.45	20.03	21.77	2.47	1.81	3.28	2.95	9.5	1.43	5.63
	c117694f1p02124	-4.76	6.66e-06	0.000374	1.87	9.63	6.37	7.14	6.81	7.25	5.79	0.62	0.44	1.16	1.18	2.75	0.43	2.83
	c117713f2p0746	-4.76	6.68e-06	0.01	1.48	10.92	8.51	10.34	7.27	4.44	1.86	0.95	1.2	1.52	0.3	2	0.89	2.55
	c117726f1p04161	-5.6	5.1e-06	0.00117	1.7	4.72	6.55	6.59	4.38	2.25	6.55	0.45	0.44	0.68	0.42	1.83	0.52	1.51
	c117733f1p02980	-4.56	5.1e-06	0.00222	1.18	6.02	5.86	2.8	6.1	5.77	7.33	1.16	0.04	0.62	1.71	1.45	0.54	2.17
	c117736f1p05912	-6.25	5.21e-06	0.000776	1.65	6.27	4.22	6.25	6.62	3.74	3.86	0.56	0.6	0.75	0.59	1.17	0.52	1.03
	c117742f1p42059	-5.42	5.54e-05	0.000124	10.8	47.72	86.88	50.78	65.37	55.15	44.27	7.08	4.02	9.45	9.07	17.79	4.68	14.55
	c117750f1p26451	-6.08	1.38e-05	1.36e-05	2.74	15.65	14.44	13.63	13.46	12.02	13.59	1.4	0.81	2.67	1.41	3.76	1.38	2.65
	c117757f1p01936	-5.34	1.21e-05	0.00183	1.28	15.22	14.76	7.41	13.87	17.68	8.62	0.48	0.29	2.54	1.04	3.63	1.5	5.28
	c117762f1p06197	3.96	-0.000805	6.71e-05	668.95	74.59	17	103.59	3.89	132.89	100.92	644.47	741.55	610.88	649.57	514.18	702.81	500.67
	c117771f1p06064	-6	6.91e-06	0.000317	1.33	9.83	5.66	5.55	5.65	5.85	8.94	0.44	0.57	1.06	1.07	1.77	0.66	1.56
	c11777f3p21152	-5.98	8.17e-06	0.00348	0.64	6.62	14.77	7.98	9.08	6.82	5.55	0.84	0.78	1.45	0.84	2.22	0.43	2.05
	c117807f1p02696	-4.89	4.57e-06	0.00325	0.61	5.53	6.26	4.19	4.63	3.48	6.13	0.67	0.08	0.53	0.66	2.67	0.34	1.35
	c117810f1p15929	-4.98	1.42e-05	0.00041	3.5	15.29	22.46	15.39	8.97	13.01	15.28	1.26	0.49	2.96	1.81	7.04	1.42	3.86
	c11782f1p0967	-5.6	1.51e-05	0.0013	2.09	8.6	20.43	17.68	15.24	10.7	22.12	1.13	1.16	2.03	1.92	6.58	2.4	2.07
	c117846f1p26757	-4.63	9.97e-06	0.000201	2.07	8.34	13.63	11.74	11.87	10.46	8.95	1.31	0.81	1.66	1.82	5.58	1.11	2.2
	c117854f1p11418	-6.04	5.36e-06	0.000679	2.01	5.62	3.46	4.72	6.13	5.35	6.17	0.71	0.16	0.48	0.16	2.56	0.35	1.12
	c117862f1p03937	-6.86	1.37e-05	0.00176	1.8	7.08	20.06	13.9	16.82	6.83	17.24	0.86	0.63	1.79	1.34	4.91	0.84	1.84
	c117865f1p12395	-4.29	7.08e-06	0.000387	2.21	6.91	9.58	7.27	9.31	6.82	7.56	0.8	1.12	2.11	1.73	3.5	0.55	1.77
	c117876f1p05906	-4.87	3.92e-06	0.01	0.82	3.25	7.88	2.99	3.46	3.04	4.3	0.48	0.26	0.68	0.78	2.16	0.27	0.65
	c11787f1p11212	-7.6	6.41e-06	0.00228	0.83	2.43	3.69	6.91	9.35	7.28	7.44	0.45	0.18	1.19	0.12	0.89	0.51	1.65
	c117898f1p01611	-5.96	6.36e-05	0.000656	13.17	67.33	86.49	40.63	73.99	88.54	32.6	2.34	2.78	6.15	8.04	22.22	10.55	15.46
	c117913f1p45915	-5.49	5.45e-06	0.000861	0.92	5.06	6.72	5.08	5.75	5.5	6.29	0.59	0.28	0.83	0.64	2.28	0.59	1.21
	c117916f1p06840	-6.05	1.97e-05	1.55e-05	3.69	20.08	22.04	17.17	23.3	17.39	19.23	1.72	1.38	3.18	1.94	6.05	2.19	3.87
	c117921f1p31803	-6.04	5.14e-06	0.00816	1.19	1.97	8.36	4.32	8.39	4.56	3.23	0.43	0.67	0.41	0.77	1.39	0.47	1.17
	c117928f1p05694	-6	1.12e-05	0.000279	2.03	9.55	17.24	8.7	12.1	12.18	8.14	1.41	0.88	0.86	1.46	3.48	1.33	2.23
	c117930f1p03911	-4.83	2.53e-05	0.00133	4.1	27.18	21.35	27.43	34.05	37.13	17.91	3.67	1.26	0.35	2.84	9.35	3.64	13.94
	c117938f1p02920	-6.16	6.28e-06	0.00105	1.39	4.76	6.64	4.95	9.92	7.54	3.53	0.32	0.65	1.25	0.84	1.53	0.47	1.22
	c117939f1p02205	-4.84	9.49e-06	0.00124	1.26	10.97	8.67	13.03	6.76	8.54	14.02	1.44	0.51	1.42	1.3	4.47	0.86	3.06
	c117959f1p16290	-6.67	9.11e-06	0.000125	1.55	7.6	8.58	7.77	13.6	8.05	8.19	0.71	0.41	1.26	0.8	2.86	0.85	1.4
	c11795f3p0770	-5.8	5.33e-06	0.000832	1.07	5.85	3.74	5.35	7.52	6.27	4.15	0.38	0.87	0.39	0.48	2.04	0.49	1.2
	c117974f1p21363	-4.62	6.65e-05	0.000832	16.44	76.52	60.21	46.97	69.14	112.43	69.71	2.52	10.1	8.22	20.2	32.02	9.36	15.3
	c118009f1p06726	-6.36	7.37e-06	7.69e-05	1.48	7.36	9.92	7.25	7.65	6.74	5.68	0.81	0.4	0.92	0.73	2.16	0.76	1.46
	c118012f1p21667	-8.2	4.79e-05	3.89e-05	6.94	50.35	54.02	50.11	51.94	45.21	25.39	2.03	2.08	4.94	0.31	11.04	2.79	11.45
	c118032f1p06232	-4.89	6.99e-06	0.000393	1.85	8.63	6.95	5.56	7.03	5.17	10.55	0.58	0.65	0.81	1.57	2.49	0.64	2.61
	c118041f1p02219	-4.67	5.04e-06	0.00221	1.1	5.51	7.1	4.1	6.01	5.28	5.25	0.67	0.28	0.56	1.22	2.26	0.6	1.76
	c118057f1p03615	-4.58	4.84e-06	0.00294	0.64	5.8	5.59	4.15	6.38	5.8	5	0.35	0.5	1.47	1.07	2.22	0.54	1.15
	c118076f1p0650	-7.18	4.04e-05	0.00918	0.99	25.34	32.42	46.11	50.04	18.48	73.57	2.13	5.17	8.85	0	7.25	2.37	8.62
	c118089f1p06665	-6.33	1.71e-05	0.000219	2.46	17.51	25.15	10.17	14.78	17.26	19.05	1.54	1.33	1.48	2.23	5.59	1.49	3.14
	c118090f1p04394	-5.45	2.9e-05	4.13e-05	3.88	29.78	29.45	28.73	36.59	32.49	27.14	2.71	2.43	5.29	4.17	8.89	2.64	8.35
	c1180f2p01278	-11.75	4.86e-06	0.00673	0.29	7.83	4.27	6.38	4.52	1.18	2.71	0.03	0.17	0.12	0	1.03	0.36	0.6
	c118109f1p05796	-6.29	3.6e-06	0.00565	0.94	4.93	4.56	2.31	4.89	2.62	2.34	0.37	0	0.47	0.33	1.57	0.23	0.63
	c11810f1p2792	-6.07	6.89e-06	0.00678	1.51	5.04	2.19	9.31	12.26	6.8	5.79	0.53	0.85	0.38	1.13	1.78	0.84	1.56
	c11812f1p01519	-5.44	1.57e-05	0.01	1.69	4.78	15.92	13.68	27.24	25.65	12.6	1.24	1.32	0.7	2.25	5.76	1.47	5.94
	c11814f2p1959	-8.09	3.32e-06	0.00988	0.57	2.53	3.61	1.97	5.78	0.86	4.05	0.26	0.23	0.24	0.62	0.95	0.04	0.05
	c118154f1p05809	-4.67	1.86e-05	0.000159	3.11	26.68	20.2	18.46	19.83	18.49	18.91	1.65	1.31	5.05	2.49	5.07	2.13	9.21
	c11817f1p02034	-4.99	1.64e-05	6.25e-05	2.71	13.99	19.67	16.47	18.98	17.65	19.21	2.02	1.16	2.76	2.16	6.83	1.94	4.93
	c118219f1p06235	-6.09	6.01e-06	0.000333	0.95	4.4	6.72	5.35	5.83	8.04	6.59	0.7	0.34	0.79	0.79	1.55	0.38	1.65
	c118224f1p1946	-6.14	6.59e-06	0.000882	1.17	9.16	9.15	6.87	3.6	5.69	5.14	0.71	0.71	0.96	0.24	2.01	0.66	1.36
	c11822f3p41382	-5.59	1.97e-05	0.000549	5.26	20.34	13.17	17.49	20.72	33.49	14.9	1.61	1.05	3.51	4.15	5.33	2.17	4.61
	c118231f1p14840	-9.02	1.04e-05	0.00124	0.91	5.71	6.54	8.6	12.83	15.64	9.69	0.55	0.73	0.89	1.02	1.16	0.6	1.69
	c118233f1p05695	-7.02	3.81e-06	0.01	0.39	5.06	1.96	2.73	6.63	4.69	1.49	0.28	0.51	0.48	0.62	0.17	0.41	0.8
	c118235f1p02219	-3.7	5.3e-06	0.00688	1.03	6.17	7.6	6.64	8.4	6.22	2.75	1.45	0.45	2.11	0.8	3.76	0.6	1.32
	c118237f1p06816	-4.77	3.55e-06	0.01	1.04	4.63	6.68	3.45	3.29	2.79	2.23	0.68	0.35	0.66	0.39	1.52	0.43	1.03
	c118243f1p06014	-5.5	3.41e-06	0.00908	0.69	3.87	3.79	2.68	3.23	4.66	3.17	0.33	0.28	0.48	0.85	0.98	0.28	0.82
	c118260f1p05785	-5.6	4.57e-06	0.00704	0.76	6.26	3.44	3.15	8.27	3.36	3.65	0.38	0	0.78	0.93	1.7	0.35	1.02
	c118265f1p06034	-4.7	5.43e-06	0.0021	1.47	6.21	8.82	2.91	4.28	6.02	6.37	0.54	0.54	0.79	1.86	2.7	0.38	0.86
	c118293f1p02328	-5.34	3.14e-06	0.01	0.67	3.73	3.23	2.59	3.52	3.26	3.46	0.23	0.43	0.49	0.29	1.39	0.16	0.84
	c118295f1p35711	-6.14	6.53e-06	0.000363	1.06	6.36	8.19	3.56	7.97	7.52	5.54	0.69	0.02	1.04	0.61	2.2	0.56	1.43
	c118296f1p01123	2.88	-0.000723	0.000249	663.08	121.85	33.67	248.78	14.77	276.35	169.94	554.25	474.15	688.76	464.61	676.02	802.3	741.71
	c11829f1p0769	-6.57	1.13e-05	0.00785	1.07	4.94	8.79	18.23	8.17	17.88	10.26	0.87	0.87	1.47	3.86	0.64	0.92	1.93
	c118306f2p22109	-3.58	1.4e-05	0.0011	3.92	13.3	15.1	15.7	17.25	17.39	22.58	2.94	1.17	5.52	2.75	10.03	1.16	5.86
	c118317f1p01440	-6	5.11e-06	0.000987	1.02	4.58	5.21	5.45	7.53	5.56	2.99	0.35	0.31	0.84	0.41	1.9	0.72	0.86
	c118327f1p05709	-5.45	9.2e-06	0.000152	1.65	9.98	10.64	6.58	10.09	7.51	12.15	1.09	0.37	1.68	0.93	3.19	1.05	2.45
	c118332f1p21522	-7.45	4.28e-06	0.00174	0.42	3.75	4.35	3.72	5.45	2.62	5.74	0.66	0.22	0.35	0.39	0.92	0.49	0.47
	c118334f1p02952	-5	2.21e-05	5.3e-05	5	25.28	28.7	17.93	28.65	21.47	19.55	2.13	2.21	4.8	2.73	8.08	2.02	7.37
	c118340f1p03500	-5.19	1.35e-05	2.83e-05	2.57	14.85	14.59	11.97	13.17	14.46	15.79	1.39	0.48	3.01	2.34	4.58	1.72	3.32
	c118343f1p06797	-5.49	9.61e-06	0.000126	1.61	7.18	11.65	8.2	10.76	9.49	12.21	0.97	0.57	1.56	1.05	3.9	0.84	2.25
	c118344f1p14366	-5.46	8.81e-06	0.000356	1.72	4.8	11.12	9.65	7.99	10.7	10.27	0.89	0.23	1.35	1.46	4.31	0.52	1.53
	c118348f1p0768	-10.23	4.99e-06	0.01	0.12	4.97	4.7	9.43	3.45	4.49	1.27	0.33	0.15	0.79	0.29	0.65	0.38	0.2
	c11834f1p1864	-6.52	8.84e-06	0.01	0.74	7.82	7.34	6.41	18.37	9.26	4.82	1.16	0.52	2.01	1.03	1.53	0.48	1.66
	c118364f1p46345	-7.11	8.32e-06	3.81e-05	1.77	8.36	8.51	4.86	9.54	7.11	9.48	0.95	0.32	1.15	0.48	2.44	0.74	0.91
	c118369f1p05899	-4.87	3.88e-06	0.01	0.42	2.23	7.02	2.87	4.38	3.06	5.6	0.48	0.3	0.76	0.57	1.75	0.35	1.04
	c11837f1p01295	-4.3	5.7e-06	0.00473	1.07	4.69	8.25	4.03	9.74	6.08	5.37	0.87	0.87	1.35	0.63	1.98	0.64	2.78
	c118380f1p16086	-7.34	2.83e-06	0.01	0.3	2.15	1.37	4.46	4.16	3.43	0.93	0.08	0.18	0.61	0.11	0.22	0.46	0.63
	c118382f1p16235	-5.75	3.38e-06	0.00911	0.16	2.97	4.76	3.34	5.25	3.58	1.76	0.36	0.3	0.3	0.46	1.43	0.16	0.77
	c118389f1p116464	-6.2	3.64e-06	0.00541	0.8	3.36	4.02	2.41	4.78	3.8	3.68	0.3	0.19	0.41	0.23	1.02	0.35	1.17
	c118390f1p05531	-5.93	4.2e-06	0.00301	1.05	4.36	5.06	2.94	4.61	5.54	3.04	0.16	0.73	0.6	0.13	1.26	0.76	0.85
	c118400f1p12953	-4.99	4.21e-06	0.0046	1	6.63	5.13	2.7	4.35	3.5	4.8	0.72	0.19	0.9	0.43	1.71	0.65	1.04
	c118420f1p44620	-6.24	6.16e-06	0.00206	0.78	4.28	5.18	5.33	8.59	4.3	9.5	0.44	0.34	0.95	0.35	1.83	0.55	1.63
	c118426f1p01978	-5.97	1.77e-05	0.000721	3.85	14.7	11.22	14.12	29.53	22.21	15.79	2.05	1.1	3.5	1.34	5.57	2.21	2.91
	c118427f1p13749	-5.95	5.78e-06	0.000486	0.69	6.97	7.07	5.06	6.65	5.37	5.07	0.56	0.33	0.97	0.58	2.16	0.49	1.12
	c118430f1p06072	-5.72	5.59e-06	0.00858	0.44	10.42	5.13	4.15	7.24	4.73	3.39	0.63	0.52	0.59	0.18	2.12	0.77	1.4
	c118448f1p06296	-5.32	8.47e-06	0.00183	1.96	14.84	6.12	9.43	5.83	6.62	9.85	0.47	0.23	2.44	2.16	2.65	1.1	1.21
	c118469f1p25945	-3.97	2.98e-05	0.0063	15.06	36.52	31.78	51.97	39.19	27.78	10.54	3.31	0.15	2.34	3.14	24.66	6.57	13.41
	c118483f1p02411	-5.5	6.53e-06	0.00027	0.95	8.41	6.23	6.4	6.38	6.76	7.21	0.64	0.42	1.13	0.71	2.3	0.69	1.81
	c118490f1p06026	-4.53	1.88e-05	6.23e-05	3.59	22.57	23.54	16.31	20.79	20.15	21.29	1.75	1.84	4.76	4.04	6.88	1.87	7.15
	c118494f1p02305	-4.7	1.13e-05	0.000715	2.98	9.43	18.5	11.71	10.12	9.29	13.74	1.46	1.31	1.57	1.61	6.93	0.84	2.42
	c118504f1p13977	-5.04	3.21e-06	0.01	0.46	3.4	5.19	3.11	3.27	3.26	2.76	0.36	0.28	0.36	0.52	1.37	0.48	0.88
	c118517f1p32656	-6.36	1.54e-05	4.47e-05	2.63	13.89	17.8	16.84	19.82	12.72	11.55	1.35	0.67	2.53	1.62	4.76	1.38	2.65
	c118527f1p25960	-6.29	0.000149	0.000133	21.98	129.43	186.25	184.57	157.37	168.5	85.23	10.76	4.55	21.92	15.23	43.69	13.77	38.56
	c118531f1p01795	-6.04	0.000462	4.57e-05	86.55	318	556.04	510.44	620.37	409.74	420.77	37.06	29	88.21	51.03	138.39	40.07	99.64
	c118534f1p36301	-6.76	9.6e-06	0.00248	1.99	6.84	7.63	13.24	12.71	13.09	2.98	1.38	1.24	0.66	0.66	2.6	0.22	1.9
	c118537f4p01586	-5.17	1.27e-05	0.000929	2.95	7.43	17.73	18.16	15.17	12.44	9.02	1.35	0.28	1.86	2.3	6.51	1.47	2.27
	c118541f1p02508	-6.33	5.9e-06	0.00205	0.62	6.84	7.77	2.37	7.39	6.93	4.32	0.33	0.27	0.39	0.5	0.86	0.9	2.48
	c118553f1p22342	-5.5	5.32e-06	0.00712	1.14	6.07	6.53	3.03	7.81	7.72	1.6	0.86	0.14	0.49	0.86	1.38	0.51	1.93
	c118560f1p06506	-6.03	3.6e-06	0.0062	0.51	5.56	3.63	1.64	2.71	4.34	4.5	0.7	0.38	0.85	0.42	0.77	0.4	0.28
	c118563f1p06116	-9.81	4.53e-06	0.00194	0.25	1.67	6.31	4.39	5.87	3.64	3.6	0.24	0.27	0.34	0.44	0.44	0.15	0.73
	c118566f1p06247	-5.61	2.98e-06	0.01	0.88	3.67	3.48	2.59	3.11	2.67	2.78	0.46	0.19	0.4	0.36	1.05	0.37	0.59
	c11856f1p01302	-5.95	5.56e-06	0.00293	1.13	5.73	2.99	4.05	5.81	5.2	9.72	0.58	0.43	1.63	0.91	1.52	0.35	0.39
	c118575f1p12389	-6.98	1.66e-05	0.000425	2.92	21.78	13.73	8.81	17	14	22.69	0.79	0.47	2.05	1.83	7.18	0.43	1.69
	c118589f1p16607	-6.36	2.46e-05	2.83e-05	3.52	24.23	27.84	20.14	30.74	22.29	24.11	1.86	1.49	4.35	2.8	7.04	1.77	4.74
	c118593f1p05177	-5.82	3.78e-06	0.00523	0.73	2.91	4.06	3.21	4.01	4.07	5.09	0.39	0.28	0.63	0.36	1.07	0.5	0.91
	c118603f1p14729	-4.67	4.88e-06	0.00262	0.95	3.63	6.87	5.91	5.97	5.26	4.76	0.88	0.57	0.88	0.87	1.7	0.43	1.83
	c118629f1p01015	-21.11	2.22e-06	0.01	0.09	0.68	1.99	1.93	2.61	1.09	3.56	0	0	0	0.22	0.16	0.08	0.1
	c11862f1p01382	-5.9	8.73e-06	0.000325	1.65	12.32	8.5	9.52	8.42	4.46	9.78	0.99	0.56	0.71	1.07	2.91	0.93	2.1
	c118632f1p16983	-6.64	4.14e-06	0.00251	0.73	1.86	3.46	3.42	5.74	4.47	5.79	0.26	0.13	0.51	0.33	1.4	0.39	0.81
	c118637f1p01056	-4.65	3.37e-06	0.01	0.66	4.1	6.68	3.13	2.59	3.4	2.57	0.3	0.12	0.62	1.15	1.36	0.21	1.21
	c118655f1p02003	-6.25	4.84e-06	0.00122	0.68	4.97	5.14	2.88	5.69	5.87	5.17	0.29	0.36	0.56	0.63	1.71	0.46	0.85
	c118656f1p15928	-6.7	9.2e-06	0.000756	1.13	10.8	10.33	6.77	14.09	6.11	7.02	0.93	0.38	1.37	0.98	1.61	0.58	2.56
	c118670f1p05979	-6.25	6.55e-06	0.01	1.3	10.56	2.02	3.33	10.88	8.13	4.45	0.36	0.63	0.75	1.4	1	0.79	1.57
	c118674f1p11710	-4.57	1.67e-05	0.00033	4.83	21.29	23.18	16.65	20.39	19.23	8.04	1.58	1.32	4.02	3.25	5.91	1.72	7.04
	c118675f1p06068	3.94	-0.00216	4.44e-05	1760.52	221.08	42.67	286.13	9.63	367.44	287.67	1925.96	1835.46	1628.55	1725.51	1460.2	1800.71	1346
	c11867f2p1612	-10.68	6.56e-06	0.00203	0.6	2.83	7.55	4.53	10.51	6.54	4.54	0.27	0.37	0.12	0.85	0.81	0.54	0.5
	c118685f1p02199	-5.17	6.82e-06	0.00199	1.21	6.16	12.09	5.64	7.69	6.16	5.38	0.86	0.87	0.93	0.51	2.56	0.91	1.94
	c118700f1p16087	-4.79	4.08e-05	0.00176	15.91	48.38	34.07	36.71	78.15	38.27	22.54	3.85	2.57	8.31	6.92	21.11	5.42	9.06
	c118703f1p32024	-5.16	5.97e-06	0.000604	1.63	7.85	5.47	5.52	8.12	5.43	5.47	0.29	0.06	1.56	0.51	3.05	0.61	1.57
	c118708f1p05606	-5.17	4.69e-06	0.00261	0.79	3.52	6.84	3.1	6.47	5.73	3.74	0.72	0.46	0.54	0.32	2.02	0.73	1.05
	c118713f1p05112	-5.42	3.25e-06	0.01	1.02	0.78	4.46	4.21	4.26	2.08	4.21	0.43	0.13	0.53	0.31	1.02	0.43	1.02
	c118721f1p16270	-6.05	4.27e-06	0.00265	0.97	4.98	5.85	2.94	3.7	4.36	4.21	0.5	0.32	0.48	0.72	1.45	0.3	0.71
	c118730f1p11831	-9.17	8e-06	0.00418	0.9	5.58	13.16	7.16	11.42	3.77	4.48	0.75	0.06	0.21	0.33	2.17	0.66	0.9
	c118732f1p06336	-7.15	5.85e-06	0.00459	1.08	2.15	6.3	5.96	10.48	4.05	5.12	0.29	0.2	0.64	0.55	1.59	0.56	1.09
	c118742f1p16229	-6.23	2.94e-06	0.01	0.6	4.67	3.58	1.54	2.16	2.1	3.83	0.28	0.13	0.34	0.2	1.05	0.42	0.56
	c118754f1p05718	-5.54	4.53e-06	0.0024	0.75	5.57	4.58	2.85	4.09	4.36	7.09	0.27	0.32	0.67	0.99	1.62	0.39	1.04
	c118765f1p16022	-6.57	5.98e-06	0.00302	0.88	3.02	9.2	6.67	8.08	5.4	3.31	0.59	0.33	0.37	0.82	1.89	0.36	1.21
	c118767f1p03978	-5.41	3.18e-06	0.01	0.55	2.26	1.8	3.39	4.62	3.41	4.64	0.47	0.24	0.7	0.24	0.87	0.43	0.86
	c118772f1p46702	-7.7	1.89e-05	1.61e-05	2.36	16.27	20.28	17.72	18.88	16.39	20.57	1.62	0.57	2.03	1.75	4.13	1.33	3.17
	c118779f1p21035	-8.92	5.33e-06	0.000286	2.13	7.87	4.32	3.33	2.68	4.27	6.31	0.28	0.32	0.15	0.58	0.64	0.8	0.7
	c118781f1p05610	-5.01	3.49e-06	0.01	0.66	3.78	3.89	2.95	4.03	3.13	4.77	0.34	0.23	0.64	0.51	1.36	0.35	1.2
	c118783f1p0368	-6.5	1.9e-05	1.61e-05	3.75	16.49	24.32	17.83	20.56	16.88	17	2.05	3.04	2.06	3.03	3.15	2.26	2.37
	c118806f1p02217	-5.07	1.7e-05	0.000117	3.7	20.36	21.51	12.1	22.49	18.89	13.25	1.76	1.26	2.84	2.89	6.58	2.4	4.41
	c11880f1p01305	-4.16	8.99e-06	0.00015	1.75	11.08	11.31	9.16	9.97	10.18	8.99	1.21	0.43	1.67	2.43	4.21	1.42	3.63
	c118842f1p02642	-5.41	5.71e-06	0.000912	1.11	5.11	8.18	7.74	3.48	5.68	4.99	0.63	0.3	0.94	0.73	2.44	0.44	1.22
	c118848f1p01370	-4.95	3.36e-06	0.01	0.6	2.02	4.74	3.06	4.33	3.73	3.96	0.76	0.08	0.5	0.22	1.51	0.33	1.13
	c11885f2p01379	-5.74	3.23e-06	0.00995	0.33	2.01	1.99	2.94	5.85	3.3	3.73	0.27	0	0.44	0.38	0.84	0.72	0.86
	c11886f2p31309	-5.03	2.16e-05	0.01	3.58	22.38	14.78	30.34	27.45	37.54	6.58	1.06	1.11	1.39	6.43	7.9	3.53	6.95
	c118873f1p05968	-6.05	6.39e-06	0.000272	1.12	4.85	8.87	5.27	7.98	5.81	5.53	0.68	0.45	0.67	0.63	1.93	0.64	1.52
	c118889f1p04717	-4.48	5.27e-06	0.00205	1.49	4.06	6.1	6.7	3.39	5.2	8.58	1.21	0.14	1.18	0.49	2.91	0.57	1.44
	c118897f1p02735	-3.38	1.79e-05	0.00872	5.28	25.42	28.92	11.4	22.87	17.87	27.4	1.84	1.43	3.93	4.79	17.48	6.2	5.45
	c118917f1p05965	-9.62	3.66e-06	0.00299	0.07	4.69	2.91	1.61	5.39	2.81	3.23	0.11	0.04	0.4	0.23	0.57	0.46	0.35
	c118922f1p31901	-4.04	8.18e-06	0.00118	2.32	9.57	6.67	13.55	7.49	10.88	7.16	0.29	0.88	2.83	3.91	3.3	0.76	2.3
	c118927f1p01676	-5.57	3.42e-06	0.00872	0.66	2.78	4.46	1.93	3.08	3.7	5.46	0.02	0.47	0.36	0.58	0.89	0.4	1.25
	c118947f1p06339	-5.25	5.56e-06	0.00279	0.91	7.96	8.36	2.8	4.69	5.16	5.9	0.44	0.55	0.33	1.05	1.83	0.49	2.14
	c118949f1p02759	-5.65	1.02e-05	0.000106	2.06	8.72	12.17	9.7	12.87	7.59	11.07	1.09	0.41	0.9	0.92	4.91	0.54	2.59
	c11894f2p01598	-5.63	3.13e-06	0.01	0.34	3.04	2.8	3.17	4.42	2.68	3.83	0.29	0.56	0.19	0.19	1.71	0.44	0.22
	c118956f1p32076	-7.57	3.39e-05	0.01	1.33	60.77	26.65	9.14	20.49	45.73	40.17	1.41	1.51	0.73	0.36	9.5	5.12	8.35
	c118957f1p15904	-5.22	4.07e-06	0.00476	0.79	4.78	5.64	4.74	2.95	4.23	3.69	0.44	0.46	0.64	0.97	1.09	0.44	1.1
	c11895f1p0515	-4.23	4.97e-06	0.00373	1.42	3.35	6.42	4.06	8.78	5.07	5.11	0.89	0.22	1.9	0.43	2.88	0.56	1.19
	c118965f1p05984	-6.57	2.25e-05	0.000708	3.66	36.46	17.26	14.09	28.53	22.4	16.85	1.8	1.74	1.97	3.22	5.97	2.02	4.47
	c118971f1p05684	3.92	-0.000214	4.54e-05	176.57	21.03	6.24	25.76	2.26	36.21	29.53	191.9	184.58	165.91	174.58	151.02	169.23	128.14
	c118978f1p46108	-15.74	3.16e-06	0.0046	0.56	3.92	2.15	1.77	5.24	2.48	0.89	0.03	0	0.32	0.18	0.11	0.23	0.2
	c1189f6p11180	-5.33	6.26e-05	4.74e-05	16.67	78.17	59.94	80.79	80.24	47.85	44.53	8.91	3.61	11.17	7.51	23.34	8.6	13.46
	c11903f1p1632	-5.58	4.9e-05	0.00301	10.62	40.88	32.89	32.76	72.62	84.31	39.81	2.52	3.37	11.26	11.07	13.74	4.21	10.08
	c119040f1p02034	-6.21	7.94e-06	0.000114	1.14	7.63	9.77	6.55	10.1	6.62	7.01	0.75	0.17	0.97	0.85	3.11	0.7	1.32
	c119041f1p02754	-5.85	4.56e-06	0.00344	0.7	3.28	5.88	3.4	3.3	4.17	7.63	0.32	0.16	0.83	0.68	2.11	0.14	0.62
	c119042f1p01522	-4.94	1.05e-05	0.01	2.55	5.83	17.94	10.53	3.78	10.39	18.39	1.13	0.9	1.72	0.65	5.2	1.22	3.23
	c11904f1p01108	-5.65	8.4e-06	0.01	2.4	12.51	2.21	4.33	12.28	14.07	5.52	0.72	1.21	0.68	1.88	2.09	0.67	2.18
	c119051f1p2911	-7.9	2.6e-06	0.01	1.01	0.95	3.64	1.63	1.25	2.58	4.27	0.28	0	0	0.25	1.09	0.27	0.06
	c119053f4p01328	-14.14	3.11e-06	0.01	0.21	3.52	0.33	1.37	4.08	2.8	4.6	0.09	0	0.06	0.45	0	0.09	0.5
	c119060f1p06150	-5.68	2.26e-05	3.15e-05	4.44	22.62	22.76	19.18	31.61	22.16	21.69	2.02	1.23	3.82	2.81	6.82	2.42	6.29
	c119062f1p12133	-5.2	6.48e-06	0.000333	1.34	6.99	8.39	4.82	5.97	7.57	7.56	1.08	0.53	1.03	0.24	2.95	0.58	1.78
	c119074f1p04718	-6.52	4.29e-06	0.00361	0.87	3.02	5.45	3.45	7.32	2.34	3.61	0.32	0.28	0.67	0.3	1.09	0.39	0.95
	c119082f1p06277	-7.46	4.31e-06	0.00393	0.81	5.11	5.52	5.38	1.07	2.29	5.36	0.46	0.09	0.3	0.08	1.54	0.4	0.54
	c119088f1p0592	-7.48	3.66e-06	0.00374	0.67	3.18	2.11	3.59	4.62	5.06	2.8	0.54	0.41	0.42	0.41	0.91	0.08	0.19
	c119090f1p02833	3.97	-9.07e-06	0.00124	7.44	0.67	0.25	1.31	0	1.41	1.17	9.77	7.17	6.85	6.42	5.97	6.8	5.71
	c119094f1p05740	-7.34	4.19e-06	0.01	0.3	0.91	5.29	6.45	4.79	4.89	2.38	0.32	0.04	0.37	0.51	0.69	0.57	0.91
	c119096f1p45911	-11.19	3.02e-06	0.00556	0.33	1.2	3.49	2.55	3.86	2.19	3.55	0.02	0.04	0.06	0.04	0.18	0.47	0.72
	c11910f1p11015	-5.79	4.55e-06	0.00205	1.72	5.81	3.42	3.94	7.21	2.59	4.25	0.33	0	1.05	1.47	1.22	0.37	0.56
	c119111f1p06153	-5.63	6.48e-06	0.000831	0.47	5.73	8.76	7.43	7.04	7.3	4.14	0.45	0.33	1.12	0.69	2.99	0.39	1.28
	c119129f1p02844	-5.31	4.28e-06	0.00355	0.85	4.73	4.49	4.68	4.74	4.72	3.79	0.23	0.22	0.81	0.89	1.68	0.46	0.99
	c119144f1p01949	-5.83	3.2e-06	0.01	0.69	2.96	3.46	2.16	3.76	3.46	3.85	0.16	0.12	0.77	0.28	1.1	0.35	0.71
	c119153f1p05842	-6.06	6.6e-06	0.00187	1.42	8.1	5.96	3.62	10.39	3.72	7.86	0.22	0.51	0.92	1.11	2.21	0.9	0.9
	c119157f1p05579	-4.58	4.7e-06	0.0034	0.8	4.71	6.17	4.55	4.23	5.33	6.57	0.63	0.75	1.29	1.05	1.3	0.7	1.34
	c119160f1p22551	-4.1	4.16e-06	0.00781	1	3.96	3.57	6.96	3.75	4.32	6.02	0.55	0.13	1.05	0.29	2.21	1.01	1.97
	c119168f1p07486	-4.91	6.87e-06	0.000441	1.66	6.11	10.37	5.27	8.48	5.75	7.31	0.88	0.36	1.42	1	2.75	0.85	1.89
	c119175f1p275156	-3.47	6.32e-06	0.00202	2.19	5.61	8.45	7.67	6.31	10.14	8.36	1.37	0.78	1.98	0.94	3.67	0.93	4.35
	c119204f1p01821	-4.98	1.18e-05	8.22e-05	2.35	13.09	9.14	11.23	15.33	13.57	12.74	1.58	0.81	1.85	1.03	4.09	1.5	4.68
	c119212f1p02176	-5.81	3.29e-06	0.01	0.38	1.28	2.99	5.26	4.87	2.35	3.39	0.35	0.05	0.38	0.51	1.18	0.23	0.83
	c11921f2p4740	-5.47	4.08e-05	0.00235	7.58	58.11	72.56	39.22	25.9	28.73	33.82	3.57	4.69	8.39	3.32	14.64	4.49	9.52
	c119221f1p04575	-6.25	3.87e-06	0.00408	0.78	2.84	4.95	3.4	3.88	2.77	5.62	0.47	0.37	0.35	0.2	1.39	0.33	0.79
	c119223f1p16181	-5.52	0.000507	0.000197	91.56	497.32	581.77	477.52	601.3	716.5	310.38	42.35	23.31	89.56	71.59	185.63	46.25	134.86
	c119230f1p0861	-8.32	5.24e-06	0.00207	0.46	3.88	4.48	3.61	8.77	3.6	5.7	0.47	0	0.38	0.83	1.75	0.05	0.19
	c119233f1p06987	-4.38	4.54e-06	0.00457	0.84	3.95	7.29	4.69	5.22	4.33	5.47	0.73	0.3	1.16	0.81	1.57	0.68	1.99
	c119236f7p6860	-6.89	1.76e-05	0.00101	2.67	12.9	24.84	16.21	10.85	13.48	26.67	2.83	0.13	3.26	1.56	5.58	0.73	1.55
	c119245f7p4878	-9.84	0.000129	0.00344	16.44	98.34	42.25	182.01	199.6	135.21	70.3	8.35	2.68	27.43	5.17	13.94	13.16	4.92
	c119249f1p02401	-6.62	7.05e-06	0.00269	1.3	11.27	8.72	3.98	8.99	4.83	4	0.3	0.33	0.73	0.34	2.45	0.66	1.71
	c119270f1p06315	-4.77	5.22e-06	0.0017	1.08	6.44	5.94	5.12	5.59	5.04	6.19	0.7	0.74	1.02	0.68	1.95	0.7	1.62
	c119271f1p04938	-7.7	5.14e-06	0.00148	0.99	4.44	6.48	4.92	7.87	3.15	2.4	0.22	0.24	0.11	0.61	2.12	0.2	0.43
	c119280f1p46591	-8.01	2.89e-05	0.00694	2.84	11.04	54.05	29.25	37.11	17.75	21.76	1.39	0.47	5.58	3.65	6.11	2	2.49
	c119296f1p06014	-5.43	5.73e-06	0.000627	1.82	6.76	6.61	6.36	3.44	5.96	6.15	0.84	0.49	0.97	0.61	1.42	0.9	1.6
	c11929f1p01380	-6.33	3.27e-06	0.00851	0.6	1.63	2.92	3.28	5.29	4.69	1.51	0.3	0.08	0.11	0.54	1.02	0.39	0.71
	c119307f1p05892	-5.56	6.02e-06	0.00124	0.73	8.7	6.75	3.41	6.86	4.84	6.81	0.62	0.15	0.68	0.51	2.24	0.81	1.84
	c11930f2p2798	-4.93	1.32e-05	0.00234	2.75	14.94	21.44	8.02	17.94	9.48	13.36	0.99	0.42	2.55	2.14	8.05	1.51	2.18
	c119310f1p03175	-5.57	3.08e-06	0.01	1.03	2.33	4.12	3.8	5.18	1.86	1.6	0.1	0.18	0.35	1.05	0.81	0.35	0.73
	c119316f1p03599	-5.19	1.2e-05	4.39e-05	3.39	12.33	14.82	8.69	15.82	12.64	9.8	1.04	0.75	2.99	1.66	4.07	1.16	3.28
	c11932f9p1973	-6.33	3.93e-06	0.00846	0.66	6.05	4	2.85	4.91	0.71	4.99	0.82	0.11	1.17	0.15	0.76	0.17	0.63
	c119350f1p05410	-9.36	3.2e-05	0.00391	2.7	13.78	59.86	26.77	27.36	28.74	27.3	0.69	0.25	3.77	1.94	8.22	0.05	5.02
	c11935f2p01021	-8.32	3.8e-06	0.00677	0.9	4.92	2.4	4.77	3.82	5.13	0.14	0	0	0.82	1.02	0.16	0.2	0.45
	c119360f1p51935	-4.65	4.19e-05	0.00615	3.28	80.02	37.3	49.26	47.17	38.24	31.97	2.92	1.1	8.38	5.66	20.13	6.34	17.29
	c119371f1p22078	-6.45	4.46e-05	0.000122	8.67	36.46	52.23	24.39	53.76	55.87	45.29	1.85	1.89	5.03	8.99	16.32	4.92	3.91
	c119400f1p05768	-5.7	9.74e-06	4.93e-05	1.49	8.43	11.78	8.84	10.52	9.67	10.45	1.06	0.52	1.63	1.21	3.68	0.88	1.74
	c119402f1p05177	3.99	-7.18e-05	6.51e-05	60.86	6.3	1.5	8.11	0.82	12.34	7.83	69	57.64	53.96	56.39	50.37	60.08	42.68
	c119407f1p25832	-5.7	3.13e-06	0.01	0.53	2.31	3.48	3.15	4.44	1.65	4.54	0.23	0.13	0.44	0.37	1.2	0.11	1.04
	c119409f1p01506	-4.82	4.58e-06	0.00669	0.79	3.23	6.05	2.65	4.44	5.42	7.67	0.17	0.15	0.55	0.1	2.36	0.58	2.36
	c119411f1p06076	-4.85	9.81e-06	0.000283	1.7	13.75	13.06	9.52	8.46	10.02	8.4	1.34	0.73	1.57	1.65	3.99	1.24	2.86
	c119414f1p06867	-4.8	5.04e-06	0.00176	1.01	6.19	6.41	2.36	4.7	6.57	5.92	0.54	0.63	0.98	1.27	1.75	0.49	1.25
	c119448f1p67062	-4.4	4.83e-05	0.000214	10.47	56.69	60.61	37.6	52.7	64.97	50.78	3.94	2.41	14.17	6.07	20.66	5.3	23.23
	c11944f1p01120	-7.16	2.71e-06	0.01	0.49	2.62	2.18	1.56	4.59	2.09	2.97	0.26	0.3	0.13	0.13	0.74	0.15	0.59
	c119462f1p17124	-4.79	7.72e-06	0.00235	1.09	9.64	5.97	8.58	12.05	9.5	4.6	0.72	0.44	1.68	1.32	3.49	1.23	1.87
	c119468f1p07041	-5.89	1.08e-05	3.09e-05	1.59	12.41	10.67	9.87	10.64	11.57	10.32	1.21	0.54	1.51	1.58	3.28	1	2.25
	c119496f1p16199	-5.51	5.51e-06	0.00667	1.27	5.84	3.14	3.52	10.53	6.17	4.62	0.91	0.36	0.79	0.8	1.72	0.7	1.08
	c119500f1p31104	-4.88	1.7e-05	0.000112	4.33	20.57	14.77	12.62	23.53	16	21.15	1.56	1.62	3.77	1.89	7.57	1.85	4.89
	c119509f1p35000	-4.68	1.5e-05	0.00122	2.24	25.18	18.82	15.52	10.57	12.84	16.27	1.86	1.75	4.74	1.82	5.99	1.97	3.56
	c119510f1p24911	-5.72	5.03e-06	0.00122	1.17	5.82	5.6	2.11	6.88	6.05	4.66	1.04	0.23	0.23	0.8	0.92	0.56	1.87
	c119515f1p05135	-5.41	7.57e-06	0.000154	1.5	8.55	8.97	5.69	5.61	8.9	8.96	0.63	0.43	0.79	2.27	2.36	1.07	1.35
	c119520f1p0991	-5.93	1.8e-05	0.01	1.76	19.58	24.88	8.05	28.85	4.73	27.61	0.76	0.56	4.35	3.45	5.09	0.96	4.3
	c119524f1p01889	-4.2	1.37e-05	0.01	7.2	12.68	28.41	6.36	14.29	13.77	12.78	0.92	1.7	2.06	2.45	12.61	0.28	2.71
	c119527f1p02484	-5.48	3.74e-06	0.01	0.08	2.91	6.15	5.5	3.96	2.61	2.57	0.31	0.34	0.94	0.32	1.21	0.45	0.77
	c11952f4p101680	-5.64	9.9e-06	0.00107	0.71	11.35	9.62	8.66	14.18	6	12.66	0.85	0.33	1.98	1.46	2.26	1.31	3
	c119539f1p27350	-8.18	1.18e-05	0.00154	1.37	13.3	7.38	8.91	16.99	16.05	5.78	0.61	1.02	0.89	2.45	1.84	0.53	1.2
	c119557f1p12158	-5.24	1.52e-05	0.000519	3.11	9.95	14.56	15.59	23.16	19.8	13.06	1.01	0.83	2.45	2.89	6.93	1.71	3.12
	c11955f2p0504	-4.13	0.000965	0.000127	311.15	1520.9	932.74	949.07	871.31	1199.35	1050.36	138.3	76.89	187.23	191.9	474.61	111.76	472.36
	c119562f1p04736	-5.89	9.53e-06	0.000237	1.08	9.56	8.38	8.08	12.37	7.81	12.44	0.83	0.7	1.38	1.22	2.88	0.94	2.19
	c119564f1p14330	-5.58	5.27e-06	0.00102	0.61	4.33	6.28	4.82	7.1	4.36	6.65	0.66	0.36	0.71	0.49	1.95	0.45	1.49
	c119583f1p16904	-5.16	6.88e-06	0.000466	1.29	8.78	5.81	7.58	9.46	4.58	6.94	0.69	0.53	1.97	1.48	1.81	0.61	1.51
	c119587f1p05858	-5.53	7.76e-06	9.83e-05	1.82	6.75	8.89	4.91	8.33	8.38	9.88	0.6	0.32	1.3	1.18	1.98	0.5	2.98
	c119591f1p11419	-4	1.8e-05	7.87e-05	6	24.79	15.24	20.19	26.62	17.61	18.24	1.47	2.05	7.16	4.97	6.67	3.66	6.22
	c119605f1p22058	-6.89	7.78e-06	0.000806	1.01	11.12	4.05	8.24	9.6	7.61	5.43	0.65	0.51	1.29	0.26	2.4	0.58	1.13
	c119608f1p12636	-5.52	9.63e-06	0.000442	1.43	10.9	12.63	6.84	13.04	6.75	9.9	1.14	0.64	1.32	0.79	3.73	0.69	2.82
	c119610f1p16110	-6.58	6.77e-06	0.000466	0.8	4.73	8.63	4.85	8.53	5.59	8.06	0.65	0.31	0.88	1.05	1.88	0.33	1.17
	c119622f1p35763	-5.77	4.43e-06	0.00595	0.7	1.74	3.88	5.82	7.13	5.25	3.23	0.34	0.54	0.66	0.44	1.31	0.6	0.93
	c119625f1p21655	-7.2	5.48e-06	0.0097	0.5	6.5	7.24	8.22	6.02	4.09	0.5	0.51	0.47	1.05	0.45	1.1	0.33	0.68
	c119628f1p16988	-14.03	3.04e-06	0.00786	0.08	2.59	3.57	0.31	4.54	3.52	1.98	0.05	0.02	0.34	0.42	0.26	0.04	0.04
	c119635f1p06495	-4.79	8.01e-06	0.000201	1.38	10.68	7.46	8.71	7.58	7.51	9.76	0.83	0.3	1.66	0.9	3.38	0.66	3.34
	c119644f1p12382	-7.1	9.2e-06	0.00362	0.35	13.54	10.3	5.08	9.53	4.58	12.66	1.25	0.89	1.56	0.44	1.67	0.92	1.17
	c119652f1p11397	-7.12	6.6e-06	0.00363	0.92	3.72	10.75	4.26	5.96	4.64	9.45	0.42	0	1.19	0.43	1.48	0.48	1.58
	c119675f1p06737	-4.24	7.61e-06	0.00165	1.4	7.58	8.08	6.29	10.95	6.53	11.91	0.82	0.66	2.88	1.29	3.07	1.23	2.49
	c11967f8p01450	-4.66	4.04e-05	0.00076	11.34	32.5	53.42	51.01	27.02	38.91	58.35	3.87	1.78	7.31	4.67	26.22	4.7	9.99
	c119681f1p06066	-6.03	4.47e-06	0.00212	1.03	6.29	6	2.97	3.52	3.38	5.11	0.36	0.37	0.32	0.53	1.51	0.54	1.06
	c11968f1p0699	-5.78	2.21e-05	0.00109	3.52	27.3	17.61	12.86	34.16	28.39	16.96	2.97	1.43	2.15	2.96	7.98	3.3	3.57
	c119695f1p05713	-5.15	5.22e-05	0.0015	8.4	52.96	77.93	54.46	56.2	71.91	22.77	3.28	2.4	11.56	8.61	22.18	5.18	13.65
	c119698f1p1810	-9.97	6.58e-06	0.00912	0.23	4.07	1.96	9.69	3.89	8.86	8.75	0.41	0.14	0.93	1.47	0.1	0	0.7
	c119705f1p05980	-9.59	8.22e-06	2.47e-05	2.21	4.44	10.88	7.17	6.85	6.76	8.16	0.02	0	0.9	0.45	1.63	0.44	1.4
	c119716f1p15955	-5.62	1.03e-05	7.87e-05	1.81	13.62	12.62	9.01	10.05	8.84	9.3	0.7	0.9	1.87	1.46	3.76	0.79	2.12
	c119749f1p45772	4.02	-0.00543	1.06e-05	3933.16	655.85	80.75	808.53	9.11	942.33	835.09	4671.19	4460.6	4345.29	4332.94	3361.26	4240.41	3816.12
	c11974f3p41081	-5.38	6.4e-06	0.01	1.87	8.17	5.34	7.07	4.19	12.25	2.18	0.89	0.1	0.91	2.48	1.38	0.73	1.14
	c119752f1p0805	-7.67	5.68e-06	0.00051	0.67	3.35	5.92	5.79	7.15	3.5	7.04	0.51	0.14	0.55	1.08	1.1	0.25	0.74
	c11977f1p11845	-4.54	4.72e-06	0.00337	1.2	4.51	6.41	5.13	6.7	5.01	3.54	0.79	0.42	0.78	0.77	2.24	0.56	1.59
	c119783f1p06738	-5.51	1.23e-05	9.5e-05	2.03	9.22	13.27	11.19	16.57	12.26	14.07	1.49	0.59	2.18	1.27	4.55	1.28	2.91
	c119785f1p15831	-5.13	1.4e-05	4.68e-05	3.44	15.81	13.78	13.01	20.13	12.99	11.78	1.49	1.25	2.09	2.04	4.61	1.78	4.46
	c119787f1p25680	-6.89	3.31e-06	0.00698	0.47	2.87	3.07	2.14	5.35	4.25	2.23	0.38	0.26	0.64	0.33	0.51	0.18	0.66
	c119794f1p15758	-6.39	3.63e-06	0.00526	0.67	2.08	6.04	2.89	3.42	4.05	3.48	0.4	0.1	0.46	0.49	1.44	0.11	0.54
	c1197f6p0821	-5.83	5.15e-06	0.00127	0.9	3.8	7.74	4.37	5.68	6.39	3.22	0.56	0.68	0.83	0.36	1.51	0.3	1.25
	c119808f1p26067	-6.28	6.99e-05	4.09e-05	10.89	66.54	78.49	64.21	82.47	83.12	50.99	3.78	1.9	10.84	8.31	20.4	5.15	19.19
	c119815f1p03115	-5.76	1.07e-05	1.88e-05	2.54	10.74	12.37	12.05	11.5	8.82	9.06	1.28	0.76	1.29	1.31	4.12	0.76	2.13
	c11981f3p1687	-5.22	6.36e-05	0.000247	12.96	57.46	73.43	78.57	96.58	54.57	44.45	5.72	2.12	8.48	11.15	22.6	7.85	22.19
	c119822f1p21787	-6	9.37e-06	0.000421	1.61	11.97	5.54	7.97	9.6	8.32	13.33	0.55	0.98	0.87	0.65	2.54	0.91	3.21
	c11982f7p21216	-5.74	8.7e-06	0.00104	2.18	9.51	7.57	5.82	11.26	13.57	4.9	1.13	0	1.67	1.22	2.51	1.16	1.85
	c119839f1p01345	-5.4	3.68e-06	0.01	0.65	3	6.48	2.18	2.98	5.22	2.96	0.07	0.26	0.48	0.23	2.67	0.07	0.57
	c119843f1p05985	-4.79	3.51e-06	0.01	0.52	3.75	3.79	4.89	4	3.05	3.77	0.33	0.19	1.32	0.69	1.33	0.46	0.65
	c119863f1p31984	-4.64	5.73e-06	0.00104	1.99	4.97	7.12	6.13	7.49	6.53	4.69	0.76	0.45	1.52	0.94	1.42	0.69	2.61
	c119867f1p05715	-6.75	2.86e-06	0.01	0.45	2.76	0.96	3.09	4.03	2.56	3.74	0.00732	0.22	0.21	0.39	0.4	0.25	1.12
	c119870f1p01611	-9.24	1.78e-05	0.000143	1.88	17.22	16.57	12.77	21.05	23.22	10.27	0.7	0.63	1.32	1.8	2.67	1.6	2.42
	c119874f1p11970	-7.83	2.06e-05	2.04e-05	4.24	17.57	25.08	17.14	25.74	13.92	18.94	1.27	1.13	3.76	1.7	2.89	2.17	2.73
	c119884f1p52386	-14.4	2.63e-05	0.0021	3.04	36.77	16.21	17.07	20.08	39.92	11.59	0.77	0.42	0.63	1.34	3.88	2.46	0.54
	c119896f1p06292	-5.06	4.01e-06	0.0055	0.68	4.32	4.49	3.98	4.02	3.94	5.2	0.54	0.23	0.84	0.56	1.71	0.39	1
	c11989f1p11251	-6.46	8.72e-06	0.00471	0.29	13.51	7	5.81	9.02	12.4	5.86	0.2	0.45	0.54	1.12	0.85	0.73	4.45
	c1198f3p3948	-4.13	8.18e-06	0.00322	0.29	8.78	8.53	9.49	9.18	8.3	13.2	0.44	1.06	0.8	2.04	3.66	1.36	4.61
	c119923f1p22338	-4.68	1.23e-05	0.000148	3.46	18.49	12.77	10.81	13.33	8.61	15.01	1.46	1.14	2.65	1.71	5.38	2.08	3.21
	c119951f1p06215	-5.74	4.12e-05	6.67e-05	7.32	42.81	42.84	30.93	55.28	48.38	35.26	2.86	2.89	5.74	4.08	16.17	5.53	8.53
	c119960f1p16907	-5.45	3.21e-06	0.01	0.9	4.11	3.94	1.59	3.81	2	4.52	0.32	0.24	0.67	0.61	1.04	0.32	0.62
	c119968f1p01496	-4.29	9.09e-06	8.17e-05	2.21	9.97	11.38	10.09	11.21	9.32	8.08	1.2	0.82	1.77	2.04	4.81	1.31	2.54
	c119975f1p06155	-4.31	1.15e-05	0.00641	2.05	11.67	11.93	19.21	4.45	13.77	17.27	3.58	1.78	2.19	2.87	4.44	0.52	3.28
	c119989f1p16721	-5.34	3.3e-06	0.01	0.76	2.62	3.9	3.18	4.46	3.52	3.1	0.45	0.15	0.61	0.49	1.2	0.43	0.7
	c119991f1p13876	-7.25	7.35e-06	0.00627	2.06	2.01	7.63	9.18	10.44	2.14	10.58	0.21	0.23	1.8	0.4	0.94	0.71	1.79
	c119993f1p13262	3.83	-0.000991	5.47e-05	823.57	107.86	16.56	139.68	2.75	177.21	147.43	925.9	814.66	732.21	802.2	695.81	820.88	627.83
	c119995f1p06573	-4.76	3.86e-06	0.00742	1.06	5.05	4.85	3.27	2.39	4.73	4.7	0.83	0.22	0.63	0.53	1.56	0.59	1.12
	c11999f1p01305	-6.74	6.05e-05	0.00358	5	36.01	86.82	45.52	45.51	99.22	54.44	1.67	2.83	10.27	13.69	16.29	1.47	9.06
	c119f17p71274	-6.25	4.15e-05	2.19e-05	7.65	37.83	38.63	42.17	52.15	35.86	43.98	1.32	1.49	5.94	3.27	13.89	3.98	11.42
	c120018f1p02679	-6.8	3.74e-06	0.00392	1.03	2.33	2.31	3.98	5.97	3.96	3.32	0.3	0.38	0.65	0.28	0.55	0.29	0.92
	c12001f1p0773	-5.92	4.15e-06	0.00589	0.48	4.71	2.8	3.41	4.73	2.5	7.19	0.76	0.29	0.29	0.48	1.28	0.32	0.93
	c120028f3p11057	-6.49	4.83e-06	0.01	0.52	8.37	5.46	1.86	7.04	2.35	4.21	0.36	0.11	0.93	1.41	1.1	0.35	0.34
	c120034f1p06553	-5.69	3.59e-06	0.007	0.82	3.39	4.84	3.16	4.46	2.28	4.12	0.37	0.1	0.77	0.35	1.31	0.38	0.78
	c120046f1p05045	-7.42	3.36e-06	0.00558	0.84	3.39	2.54	2.87	2.87	3.97	3.72	0.55	0.11	0.15	0.19	0.79	0.32	0.6
	c120051f1p06279	-4.82	7.04e-06	0.000284	1.86	8.38	7.09	7.26	10.47	5.99	5.2	0.56	0.38	1.23	0.9	3.43	1.11	2.01
	c120061f1p06095	-7.82	4.48e-06	0.0012	0.63	2.76	5.96	3.72	6.18	4.05	3.62	0.26	0.07	0.62	0.46	0.89	0.42	0.71
	c120064f1p36210	-5.43	3.17e-06	0.01	0.59	3.71	3.63	3.12	4.18	2.82	2.66	0.3	0.23	0.59	0.66	0.93	0.5	0.6
	c120071f1p35768	-6.55	1.27e-05	2.95e-05	2.28	10.46	13.14	12.97	16.12	11.59	10.83	1.2	0.54	0.96	0.74	4.68	1.19	2.51
	c120075f1p02033	-6.32	3.24e-06	0.0087	0.79	3.23	3.49	3.96	2.99	1.88	3.85	0.11	0.11	0.38	0.3	1	0.34	0.96
	c120097f1p66205	-5.42	4.34e-06	0.00313	0.53	3.21	6.77	4.09	5.06	2.63	5.26	0.57	0.25	0.76	0.49	1.41	0.34	1.26
	c120115f1p05873	-4.95	3.57e-06	0.00981	0.51	3.82	5.34	2.85	4.23	2.48	4.76	0.4	0.32	0.59	0.4	1.54	0.54	1.05
	c120118f1p12272	-5.32	3.96e-06	0.01	1.45	6.37	0.76	3.34	6.29	2.84	4.32	0.35	0.98	0.86	0.26	1.37	0.38	0.56
	c120129f1p05673	-5.6	1.1e-05	8.22e-05	1.83	13.23	11.47	7.79	13.74	11.45	10.36	0.71	0.63	1.89	1.25	3.98	1.29	2.72
	c12012f1p1804	-5.92	3.98e-06	0.00383	0.8	4.1	2.51	5.64	3.45	6.18	2.42	0.52	0.14	0.85	0.37	1.13	0.21	1.02
	c120136f1p04019	-5.84	9.96e-06	4.79e-05	2.44	7.32	12.61	9.91	12.08	10.28	7.49	0.97	0.36	1.41	1.02	3.88	0.63	2.37
	c120161f1p22275	-5.63	2.1e-05	5.66e-05	2.99	21.12	24.56	21.18	16.41	21.19	26.9	2.62	1.38	4.06	3.08	5.86	2.3	4.57
	c120162f1p06588	-5.62	1.05e-05	0.000283	2.4	10.39	11.2	6.8	16.41	8.92	10.66	1	0.61	1.13	1.12	4.66	1.17	2.19
	c120175f1p06187	-5.94	3.05e-05	2.77e-05	5.33	33.04	30.99	24.9	39.76	33.14	25.42	3.26	1.94	4.46	5.4	7.92	3.06	6.39
	c120189f1p01901	-6.02	3.63e-06	0.00581	0.96	2.27	4.47	3.44	4.23	3.19	4.3	0.22	0.29	0.44	0.39	1.26	0.39	0.81
	c120193f1p44484	-5.78	7.31e-05	3.87e-05	11.39	67.24	85.98	66.95	77.39	95	62.86	6.46	3.1	15.88	11.68	18.27	8.34	17.01
	c1201f21p91561	-5.21	2.06e-05	0.00101	2.94	14.55	21.54	20.24	35.86	19.37	21.11	1.69	1.29	4.46	3.34	6.15	2.42	6.65
	c120200f1p01512	-7.75	2.7e-06	0.01	0.48	2.28	4.85	2.09	2.49	1.54	2.56	0.39	0.29	0.3	0.29	0.38	0.11	0.34
	c120203f1p05696	-9.13	5.77e-06	0.000813	0.87	3.88	7.8	8.16	4.8	4.44	3.16	0.29	0.1	0.59	0.51	1.04	0.87	0.23
	c120204f1p25764	-5.75	6.74e-06	0.00029	0.94	6.83	4.93	8.15	5.36	8.77	7.16	0.84	0.35	0.7	0.25	2.91	0.9	1.39
	c120222f1p26837	-4.73	4.4e-06	0.00514	0.7	3.8	7.65	3.1	4.78	3.59	5.52	0.69	0.33	0.72	0.57	1.9	0.47	1.5
	c120223f1p03356	-6.49	8.03e-06	0.01	0.62	4.69	9.41	9.32	14.96	7.54	3.14	0.57	0.46	1.02	1.4	1.34	0.29	2.58
	c120235f1p36340	-4.5	3.36e-05	0.000129	11.33	36.29	29.46	39.45	42.22	24.2	46.66	1.38	2.7	12.02	5.42	19.29	4.15	6.05
	c120259f1p01242	-8.17	3.5e-05	0.00187	7.05	21.3	40.48	54.1	34.82	9.02	40.93	1.02	0.29	7.26	3.7	2.95	2.46	7.75
	c120270f1p11559	-4.81	0.00834	0.000488	1871.72	6809.78	10635.3	8740.59	12174.9	8981.47	6888.52	492.49	494.55	1461.99	1286.56	5511.55	361.74	2053.12
	c120278f1p01631	-7.43	5.16e-06	0.000823	1.07	3.29	7.43	5.26	6.72	3.13	3.58	0.21	0.55	0.28	0.55	0.61	0.15	1.76
	c120279f1p07072	-4.59	3.45e-06	0.01	0.81	3.19	2.53	4.23	5.22	4.11	3.48	0.28	0.26	0.63	0.82	1.39	0.41	1.34
	c120281f1p15938	-5.57	4.29e-06	0.00322	0.94	6.17	4.8	4.23	5.65	1.92	4.06	0.47	0.13	0.38	0.41	1.42	0.59	1.58
	c120299f1p12649	-5.51	2.39e-05	3.81e-05	4.16	21.76	26.55	19.18	30.32	23.93	28.19	2.26	1.27	5.22	3.56	7.42	2.82	5.41
	c12029f1p01049	-6.88	5.45e-06	0.00351	0.96	5.12	3.16	5.35	9.98	4.08	4.24	0.32	0.43	1.16	0.07	1.26	0.71	0.83
	c120308f1p07095	-5.63	5.99e-06	0.000438	1.26	5.04	6.54	5.76	7.29	5.61	7.06	0.54	0.54	0.93	0.75	2.15	0.59	1.36
	c120313f1p16348	-2.87	6.45e-06	0.01	2.49	9.34	7.12	4.52	12.67	8.45	10.14	1.17	1.3	2.9	3.34	5.88	2	2.46
	c120329f1p11525	-12.08	3.74e-06	0.00163	0.9	4.97	1.5	2.82	4.19	4.32	2.17	0.03	0	0.2	0.24	0.22	0.11	0.94
	c120331f1p02474	-5.34	2.69e-05	0.000739	5.79	30.88	24.77	28.94	33.46	11.21	40.31	2.47	1.36	4.28	4.72	8.18	2.72	9.11
	c120335f1p15916	-5.43	1.77e-05	3.57e-05	3.52	17	20.54	16.4	21.43	13.63	21.54	1.66	1.21	3.39	1.83	5.7	2.2	5.01
	c12033f3p0855	-10.13	2.83e-06	0.00847	0	4.46	2.36	2.14	4.13	1.61	1.79	0.2	0	0	0.17	0.77	0.24	0.24
	c120342f1p06035	-5.46	1.72e-05	8.44e-05	4.28	18.68	21.61	10.18	16.36	22.76	16.97	1.83	1.18	2.07	3.38	6.92	1.89	3.03
	c120348f1p0824	-7.7	4.29e-06	0.01	0.24	2.74	6.27	5.25	5.31	5.09	0.55	0.33	0	0.9	0.88	0.22	0.16	0.81
	c120350f1p02006	-5.84	5.46e-06	0.000718	0.92	5.01	7.27	4.22	5.91	5.16	6.44	0.42	0.84	0.79	0.45	2.02	0.41	1.05
	c120355f1p31199	-7.59	6.72e-06	0.000715	1.07	4.19	5.06	4.51	10.31	7.37	7.19	0.31	0.19	1.77	0.06	0.97	0.52	1.41
	c120357f1p02054	-5.75	3.63e-06	0.00639	0.77	6.43	2.5	3.75	2.74	3.41	3.57	0.06	0.55	0.34	0.59	1.27	0.1	1.12
	c120364f1p21058	-6.66	1.04e-05	0.00174	0.96	7.54	8.73	9.4	17.99	11.09	8.02	1.54	0.85	1.57	0.21	3.05	0.55	1.8
	c120365f1p01032	-4.79	6.88e-06	0.000307	1.14	6.12	7.99	8.01	8.18	7.11	7.96	0.92	0.53	1.95	1.07	2.53	0.56	2.16
	c120368f1p01181	-6.1	4.17e-06	0.00294	0.93	3.37	6.47	4.4	4.37	2.1	4.7	0.28	0.19	0.51	0.44	1.61	0.07	1.22
	c12036f4p2793	-6.37	6.54e-06	0.00467	1.85	1.31	11.23	7.47	6.8	4.85	6.8	0.37	0	0.57	0.28	2.91	0.52	1.68
	c120370f2p41729	-5.68	3.54e-06	0.00728	0.96	4.32	3.26	5.33	2.05	2.08	4.67	0.73	0.52	0.13	0.09	2.11	0.27	0.15
	c120389f1p06817	-4.41	4.26e-06	0.00584	1.47	5.06	6.3	4.06	4.5	3	5.16	0.66	0.05	1.04	0.65	2.39	0.57	1.35
	c12038f2p01434	-6.04	1.92e-05	6.53e-05	2.82	17.89	25.16	14.48	19.87	19.35	20.94	1.52	0.94	2.64	2.44	7.21	0.87	4.34
	c120397f1p26457	-9.38	3.3e-06	0.00453	0.33	3.3	3.26	1.73	5.74	2.35	2.58	0.06	0.02	0.13	0.14	0.9	0.1	0.71
	c120398f1p11675	-6.47	1.13e-05	0.01	0.88	6.11	12.06	22.22	12.8	7.25	8.96	0.33	0.53	2.67	1.02	0.94	2.46	2.92
	c120403f1p01522	-7.46	6.68e-06	0.00141	2.96	8.66	1.14	8.62	4.72	4.9	8.49	0.19	0.15	0.15	0.05	2.55	0.11	2.09
	c120405f2p21513	-5.75	3.8e-05	0.00319	5.16	23.23	38.58	49.26	59.67	47.84	19.18	2.76	0.74	8.5	4.67	17.09	3.87	4.61
	c120410f1p12343	-4.36	0.000976	4.41e-05	240.86	995.13	879.65	1015.48	1303.11	1249.17	1111.43	137.33	89.93	239.64	197.63	429.68	127.95	337.48
	c120418f1p32325	-5.39	6.24e-06	0.00449	2.57	5.44	7.76	7.68	8.24	0.3	8.07	0.72	0.24	0.1	0.29	3.27	0.73	2.08
	c12041f1p2804	-5.33	9.27e-06	0.000809	1.71	9.49	6.82	6.82	8.94	14.59	11.24	1.15	0.56	1.7	1.67	3.5	1.4	1.21
	c120440f1p22050	-5.36	7.08e-06	0.000147	1.21	8.87	8.16	8.07	5.96	5.58	7.11	0.73	0.38	1.25	0.54	3.42	0.57	1.48
	c12044f4p0938	-9.35	3.56e-06	0.00569	0.29	3.88	2.31	2.89	6.18	1.47	3.26	0.27	0	0.08	0.16	0.44	0.4	0.82
	c120453f2p136326	3.92	-0.00317	1.06e-05	2339.04	369.91	70.65	479.15	8.22	687.08	424.61	2633.79	2689.41	2449.93	2349.65	2191.77	2587.75	2280.17
	c120467f1p22094	-7.51	4.34e-06	0.00287	0.7	3.89	7.44	2.91	4.64	2.24	3.85	0.4	0.21	0.8	0.25	1.07	0.28	0.42
	c120470f1p12234	-5.71	6.52e-06	0.00311	0.78	7.22	10.98	3.36	5.02	6.61	7.22	0.43	0.3	1.25	0.57	2.33	0.54	1.79
	c120476f1p11037	-7.61	6.94e-06	0.00362	0.61	6.45	8.81	3.94	9.02	2.63	9.95	1.24	0.11	0.43	0.57	1.1	0.08	1.91
	c120487f1p06445	-4.87	3.25e-06	0.01	0.57	2.23	4.21	2.57	5.08	3.72	3.49	0.39	0.24	0.61	0.33	1.17	0.27	1.47
	c120490f1p06788	-4.98	7.11e-05	0.000824	12.03	102.54	65.52	66.71	70.84	105.68	49.47	5.07	2.77	16.04	10.4	22.01	8.15	30.4
	c120492f1p06395	-5.42	3.14e-06	0.01	0.59	3.49	3.88	1.67	3.23	3.11	4.55	0.68	0.24	0.91	0.59	0.9	0.29	0.17
	c120504f1p01350	-4.96	4.35e-06	0.00537	1.62	3.05	1.93	4.47	4.64	7.97	4.65	0.32	0.09	0.38	1.56	1.45	1.01	0.9
	c120513f1p03650	-5.4	9.97e-06	9.83e-05	1.94	11.53	8.85	7.39	13.07	9.4	11.56	1.01	0.46	2.28	1.3	3.37	1.4	1.98
	c120525f1p06102	2.01	-0.000137	0.000138	161.61	55.49	74.35	66.83	35.45	59.15	47.57	157.61	143.59	147.97	142.13	138.1	150.21	126.8
	c120527f1p01425	-5.96	0.00045	0.000273	72	460.21	520.96	508.8	648.36	416.25	236.6	22.3	16.97	63.57	46.47	152.6	50.26	128.45
	c120535f1p06635	-4.36	5.91e-06	0.01	1.23	6.32	6.77	6.16	10.93	1.53	7.99	1.35	0.52	1.56	0.82	2.24	1.34	1.56
	c120545f1p06377	-5.36	7.18e-06	0.000149	1.36	6.25	9.02	7.34	6.11	6.28	9.32	0.83	0.51	1.2	0.93	2.37	0.79	1.9
	c120557f1p32098	-4.73	1.42e-05	6.06e-05	3.23	12.67	18.08	12.59	17.05	15.79	15.83	1.37	1.01	3.02	1.87	6.4	1.56	4.9
	c120558f1p02311	-4.77	1.03e-05	0.000273	2.06	12.98	14.97	8.97	11.56	8.37	9.93	1.24	0.53	1.89	1.35	5.09	1.45	2.88
	c120559f1p03484	-4.3	5.9e-06	0.00119	1.43	8.66	4.97	6.39	8.54	5.71	5.75	0.73	0.8	1.15	1.65	2.04	0.61	2.64
	c120564f1p08058	-5.38	4.29e-06	0.00344	0.77	5.82	4.53	4.37	3.89	3.84	4.77	0.35	0.21	0.94	0.7	1.34	0.34	1.32
	c120574f1p01881	-5.38	6.19e-06	0.000485	2.73	2.39	6.98	7.51	5.42	9.16	5.17	0.27	1.19	1.17	1.11	2.46	0.53	0.6
	c120577f1p06238	-4.6	5.57e-06	0.00276	0.94	5.89	7.06	4.27	7.16	3.54	8.55	0.77	0.81	1.19	1.03	2.41	0.59	1.33
	c120578f1p05793	-6.26	2.68e-05	5.71e-05	5.04	24.15	30.46	16.42	35.98	26.61	28.44	2.7	1.99	4.06	2.49	8.59	2.65	4.21
	c120579f1p05920	-6.77	3.05e-06	0.01	0.11	2.98	2.77	3.48	2.02	4.96	2.51	0.17	0.26	0.78	0.49	0.46	0.18	0.44
	c120582f1p24741	-5.91	3.71e-06	0.00817	0.93	3.55	5.6	4.32	2.05	1.11	5.51	0.04	0.52	1.21	0.14	1.71	0.07	0.21
	c12058f11p21161	-9.62	2.07e-05	0.01	4.43	10.73	43.56	14.83	14.85	12.58	18.77	0.61	0.19	0	1.02	9.1	0.68	0.84
	c120590f1p27195	-12.56	4.82e-06	0.00665	0.56	4.76	2.56	3.23	8.71	5.09	1.74	0.07	0.09	0.12	0.13	1.23	0.07	0.41
	c120598f1p05910	-6.82	2.9e-06	0.01	0.89	3.33	3.61	1.55	2.71	2.86	2.78	0.22	0.09	0.18	0.29	1.08	0.26	0.48
	c120629f1p36133	-6.91	3.26e-06	0.00753	0.62	2.13	4.59	1.66	5.09	2.94	3.01	0.41	0.13	0.46	0.4	0.48	0.3	0.72
	c120633f1p0693	-7.62	3.5e-06	0.01	0.42	2.14	3.56	2.08	1.36	5.1	6	0.39	0.35	0.23	0	0.38	0.26	1.11
	c120639f1p11968	-6.85	6.63e-06	0.000741	0.37	8.63	8.14	5.33	7.11	3.72	6.78	0.77	0	0.62	0.34	2.61	0.51	1.02
	c12063f1p0733	-8.8	3.29e-06	0.00482	0.63	3.78	0.98	3.78	3.26	3.95	2.84	0.46	0	1.03	0.2	0.11	0.17	0.21
	c120656f1p06248	-7.01	4.77e-06	0.00103	0.85	4.88	6.6	2.39	4.41	4.67	5.39	0.38	0.2	0.34	0.65	1.72	0.18	0.7
	c120658f1p02381	-5.64	4.8e-06	0.00169	1	3.35	6.24	3.18	6.82	5.21	5.13	0.7	0.56	0.48	0.91	1.7	0.42	0.71
	c12065f1p01073	-5.6	4.35e-06	0.00284	1.29	5.66	2.69	3.85	5.05	3.22	6.22	0.47	0.52	0.99	0.62	1.23	0.58	0.57
	c120684f1p04414	-6.14	5.66e-06	0.000512	0.71	5.34	6.61	4.95	7.46	4.6	6.17	0.59	0.36	0.65	1.05	1.44	0.57	1.19
	c120702f1p14520	-4.91	1.3e-05	6.06e-05	3.94	10.27	11.3	12.19	14.5	15.26	18.23	1.62	0.25	1.79	2.22	5.41	1.52	4.65
	c120705f1p05927	-6.77	7.46e-06	0.00491	1.67	7.33	8.48	2.14	8.15	12.71	4.91	0.38	0.06	0.55	0.56	3.4	0.6	1.16
	c120743f1p04579	-7.6	3.16e-06	0.00723	0.7	2.74	3.91	1.75	3.31	2.81	3.8	0.26	0.12	0.67	0.36	0.43	0.14	0.52
	c120760f1p01240	-6.98	7.83e-06	0.00816	1.04	4.33	12.69	8.95	6.2	2.67	11.77	0.03	1.17	1.34	0.84	0.93	1.01	1.49
	c120762f1p14770	-5.88	4.24e-06	0.00301	0.54	4.45	5.19	3.59	5.31	3.75	4.24	0.46	0.19	0.61	0.3	1.67	0.38	1.01
	c120775f1p16028	-5.21	5.5e-06	0.00095	0.9	5.52	5.7	6.56	6.41	5.42	5.74	0.56	0.55	0.88	0.71	2.12	0.49	1.65
	c120789f1p62415	-6.28	2.63e-05	0.000376	4.03	33.08	29.75	18.37	23.64	17.94	37.34	1.28	1.16	4.23	1.36	10.13	2.43	5.55
	c1207f10p51698	-8.56	2.76e-05	0.00117	1.73	35.65	21.29	22.14	26.89	41.12	14.05	4.11	1.78	2.8	0.7	1.51	2.61	5.53
	c120821f3p7061255	4.14	-0.00121	0.00058	734.79	104.72	38.18	109.38	9.85	175.88	399.77	689.95	950.39	883.51	1016.51	1751.57	613.84	599.43
	c120840f1p01803	-9.41	8.84e-06	0.000108	1.43	11.06	8.25	4.77	11.12	7.27	6.71	0.6	0.19	0.84	0.04	2.02	0.69	1
	c120841f2p21538	-7.98	9.2e-06	0.00365	2.09	3.15	13.51	10.16	11.96	2.87	10.84	0.46	0.22	1.08	0.53	3.01	0.03	1.5
	c120868f1p03280	-4.59	1.65e-05	0.000479	5.18	11.63	17.29	18.4	26.56	14.1	18.14	1.79	0.82	2.24	1.43	9.43	2.32	6.24
	c120879f1p02036	-8.38	9.87e-06	0.00767	0.32	11.92	9.14	3.66	13.25	15.12	4.78	0.31	0.22	1.71	0.15	3.66	0.47	0.43
	c120888f1p05905	-8.72	4.55e-06	0.000856	0.95	4.78	4.13	2.84	5.27	6.05	2.66	0.15	0.3	0.72	0.39	0.5	0.24	0.76
	c120890f1p16810	4.09	-0.01	3.18e-05	8686.37	1074.41	193.58	1474.69	32.81	1896.82	1305.6	9199.97	9818.8	8305.91	8628.86	6921.71	10009.6	7153.27
	c120899f1p05831	-5.92	3.6e-06	0.00641	0.65	3.12	5.12	2.97	4.13	2.01	4.98	0.19	0.36	0.61	0.54	1.38	0.26	0.54
	c1208f7p21026	-7.42	6.22e-06	0.01	0.72	11.83	4.22	8.24	5.16	3.09	4.06	0.69	0.22	0.15	0.51	1.53	0.53	1.4
	c120901f1p44450	-5.87	7.13e-05	2.86e-05	10.92	84.88	59.38	63.87	76.73	76.04	81.08	4.57	3.92	11.26	12.74	21.23	6.37	17.12
	c12090f1p01657	-5.83	3.5e-05	9.98e-06	7.91	34.05	39.54	33.95	39.43	30.45	36.06	3.22	2.92	4.5	3.97	12.78	2.95	7.63
	c120910f1p55401	-4.78	3.75e-06	0.00816	1.04	3.62	4.48	5.81	5.47	3.11	1.1	0.31	0.19	0.46	0.62	2.21	0.18	1.18
	c120912f1p61919	-4.86	1.52e-05	0.000831	2.92	12.28	19.7	18.54	11.16	14.09	22.88	1.03	0.35	5.29	2.56	7.06	1.19	3.43
	c120922f1p16373	-6.01	2.06e-05	3.52e-05	2.46	23.56	20.5	20.99	23.25	16.76	22.33	1.85	1.57	3.28	2.56	6.71	1.98	3.66
	c120923f1p14762	-5.4	5.31e-06	0.000975	1.93	5.12	3.23	6.94	5.81	7.17	3.93	0.25	0.28	1.09	1.28	1.84	0.52	1.06
	c120930f1p16129	-6.26	5.64e-06	0.000502	0.38	5.98	6.56	4.66	6.3	3.73	6.87	0.31	0.11	0.87	0.72	1.29	0.57	1.64
	c120940f1p16500	3.9	-0.02	1.71e-05	18032.7	2825.6	541.08	3701.57	111.01	4411.89	3512	20177.7	20527.9	18399.5	18859.4	15378.5	19433.1	16385.1
	c12094f1p1907	-6.16	5.43e-06	0.0012	0.71	4.21	6.05	7.83	3.34	6.85	4.44	0.23	0.86	0.67	0.33	1.55	0.37	1.42
	c120958f1p01768	-5.57	2.51e-05	0.00012	3.96	20.69	25.21	30.79	35.51	24.11	21.03	2.24	0.83	3.68	5.68	8.85	3.63	4.05
	c120963f1p05887	-5.97	7.24e-06	0.000832	1.15	7.72	9.66	4.61	5.29	6.38	10.41	1.37	0.45	0.68	0.85	2.09	0.55	1.58
	c120966f1p05625	-5.44	1.31e-05	0.000153	2.52	10.2	16.88	11.08	18.62	13.72	11.42	1.85	1.09	1.79	1.97	3.82	1.49	3.49
	c120981f1p21938	-6.46	6.06e-06	0.00119	0.76	5.54	3.05	8.93	7.22	4.98	6.52	0.5	0.58	0.47	0.77	1.83	0.26	1.33
	c120983f1p02713	-8.04	4.73e-06	0.000832	0.27	3.39	5.53	4.19	5.16	4.73	5.02	0.37	0.29	0.59	0.22	0.91	0.31	0.83
	c120991f1p15860	-5.82	3.48e-06	0.00742	0.99	4.05	3.08	3.69	3.85	3.6	2.91	0.45	0.25	0.45	0.46	1.14	0.53	0.53
	c120999f1p02113	-5.57	2.15e-05	0.00469	2.43	37.79	28.76	17.02	11.92	14.31	27.03	1.21	4.09	4.4	4.9	5.84	2.3	2.29
[truncated: 16,545 more rows]

## Sheet: Table S8
	TABLE S8. Complete list of DEGs in the SUGIT, LST VS LSB
	Feature ID	Fold Change (original values)	Weighted proportions difference	FDR p-value correction	T2	T16	T20	T1	T10	T18	T19	B2	B16	B20	B1	B10	B18	B19
	c100009f2p13578	-5.78	1.42e-05	0.00874	6.05	11.26	11.13	14.23	2.28	23.51	22.89	1.85	1.26	2.13	4.04	3.84	1.31	1.38
	c100015f1p02099	-4.18	2.27e-05	0.00433	14	20.89	24.43	20.5	9.35	30.17	41	5.68	1.78	3.96	8.29	15.2	0.79	2.68
	c100024f6p71651	-6.25	1.98e-05	0.01	3	22.71	28.71	24.83	0.6	22.47	24.32	0.68	1.59	6.33	7.97	0.78	1.02	1.9
	c100038f2p13475	-5.06	1.96e-05	0.00801	6.2	30.51	30.43	22.91	2.56	20.42	19.11	3.26	3.11	4.07	7.02	5.54	1.77	1.33
	c10003f3p0905	-8.13	4.8e-06	0.01	2.74	8.58	2.76	6.96	1.15	2.5	3.32	0.33	0.28	0.33	1.1	1.36	0	0.05
	c100084f5p01950	-5.42	8.4e-06	0.00722	4.25	7.72	7.41	13.5	0.91	10.62	10.02	1.49	0.4	0.66	5.04	1.37	0.57	0.51
	c100105f2p11237	-7.19	9.08e-06	0.00709	3.31	7.53	10.08	6.88	0.72	13.97	12.83	0.78	0.5	1.53	3.08	0.54	0.72	0.54
	c100157f3p171161	-10	2.96e-06	0.01	1.28	1.53	3.01	3.95	1.03	0.8	5.11	0.32	0	0.72	0.36	0.13	0	0.14
	c100160f5p11467	-5.29	5.93e-06	0.00355	5.57	8.61	4.08	5.79	0.6	6.79	6.56	1.93	0.65	0.72	1.63	1.19	0.46	0.6
	c100253f1p2976	-6.01	8.84e-06	0.00436	2.76	9.65	7.58	13.09	1.58	10.63	10.37	1.21	1.05	0.84	3.01	1.66	0.68	0.81
	c100274f2p01134	-6.92	1.06e-05	0.00212	5.99	9.75	15.35	10.17	1.33	9.81	11.99	1.37	0.73	1.93	2.04	2.12	0.2	0.92
	c10027f1p02271	-5.28	4.97e-06	0.01	1.54	6.62	3.89	6.95	0.72	7.14	5.27	0.82	0.46	0.73	1.86	1.23	0.36	0.63
	c100307f1p11661	-5.76	9.3e-06	0.00718	6.45	7.92	7.24	10.5	0.6	16.65	9.88	2.39	0.33	1.79	3.1	1.52	0.68	0.48
	c100350f3p0760	-8.41	1.29e-05	0.01	1.46	9.87	12.41	12.25	1.16	20.01	20.27	0.78	1.03	0.69	2.06	1.75	1.03	1.86
	c100432f1p01520	-4.73	4.36e-05	0.00632	24.65	63.07	35.71	41.78	9.1	76.21	45.24	9.68	5.79	5.62	17.32	15.73	4.71	3.71
	c10044f1p3574	-3.75	1.56e-05	0.00399	10.15	13.91	21.73	21.04	4.54	21.77	23.09	2.98	3.26	4.22	9.08	8.24	0.2	2.99
	c100456f1p01113	-3.43	2.25e-05	0.00885	15.13	29.08	23.01	35.07	7.02	31.98	32.33	7.07	2.71	5.07	20.57	11.15	2.03	2.05
	c100480f2p11137	-4.9	7.51e-06	0.00878	1.86	9.58	11.87	7.79	1.52	7.61	10.18	0.92	0.66	1.67	2.99	3.35	0.3	0.41
	c100497f2p21462	-5.62	3.9e-06	0.0086	0.84	3.75	5.06	4.49	1.62	4.67	4.85	0.45	0.03	1.08	1.23	1.29	0.23	0.2
	c100542f1p21375	-5.74	1.39e-05	0.00618	4.5	16.26	24.98	16.3	3.52	9.94	14.26	1.73	0.36	2.8	5.88	3.02	0.98	0.85
	c10055f1p11014	-6.41	1.74e-05	0.00658	5.13	16.63	24.6	14.76	3.29	14.95	30.1	2.5	0.98	4.11	3.18	3.14	1.88	1.28
	c100644f2p01267	-4.7	0.00023	0.00464	113.47	297.87	398.71	298.15	41.03	250.19	192.62	41.83	24.47	70.3	86.62	78.53	18.18	18.58
	c10069f1p11655	-6.04	1.41e-05	0.00237	5.4	17.98	12.68	16.88	3.31	14.56	18.32	1.89	1.18	1.88	5.15	3.05	0.41	1.19
	c100710f3p12051	-6.34	1.18e-05	0.00408	4.22	14.9	18.94	8.86	2.31	12.23	12.07	0.98	0.91	2.69	1.97	3.2	0.49	1.35
	c100711f2p22172	-5.19	9.47e-06	0.00238	5.36	10.71	9.64	14	2.28	8.07	11.62	1.88	1.28	2.3	3.08	1.58	0.36	1.41
	c100763f2p41117	-3.87	1.11e-05	0.00798	8.43	19.46	16.08	10.51	5.27	7.14	13.25	2	0.93	2.44	9.55	1.52	1.1	3.19
	c100792f2p0612	-10.93	7.75e-06	0.01	0.2	10.49	8.95	10.27	0.77	4.77	8.93	0.12	0.47	0.25	1.62	0.75	0.37	0.48
	c100797f2p41702	-11.16	7.69e-06	0.00412	1.96	10.94	6.45	7.39	0.92	9.52	6.15	0.31	0.07	0.62	1.12	0.94	0.07	0.76
	c10090f1p1511	-7.45	7e-06	0.00352	2.43	9.98	9.76	6.33	2.35	7.02	3.92	0.58	0.49	0.59	0.97	1.01	0	1.97
	c101079f16p21533	-5.36	1.99e-05	0.01	6.62	21.26	31.23	13.75	1.12	29.81	28.38	3.15	1.33	6.62	6.15	3.55	2.26	1.58
	c101081f50p71323	-3.7	9.29e-06	0.0051	9.84	14.76	7.92	13.37	3.7	9.35	8.85	2.36	0.66	1.43	5.44	7.19	0.68	0.57
	c1010f18p1841	-7.55	1.73e-05	0.00448	7.22	21.89	10.68	26.7	2.79	13.91	20.98	1.77	0.4	0.63	5.02	3.79	0.8	1.39
	c101105f6p21295	-8.02	4.2e-06	0.00701	1.05	4.28	5.78	6.04	0.64	4	2.86	0.69	0.39	0.41	0.83	0.32	0.09	0.36
	c101114f41p10964	-5.96	6.41e-05	0.00554	11.57	97.57	93.17	66.71	18	72.82	50.52	6.18	7.37	8.25	20.85	17.49	5.11	3.61
	c101117f29p101106	-5.62	1.66e-05	0.00187	9.75	14.44	17.59	20.77	4.24	24.52	14.91	3.3	0.86	4.93	3.07	5.16	1.42	0.15
	c101194f14p41022	-4.39	0.000225	0.00957	107.8	229.43	401.33	165.46	50.03	249.12	397.75	45.02	32.87	65.58	62.8	104.8	14.8	38.94
	c101218f1p41203	-9.52	8.78e-06	0.00354	2.88	11.61	7.05	5.37	1.77	9.94	11.84	0.37	0.93	0.82	1.1	1.41	0.19	0.49
	c101240f9p2984	-6.39	4.01e-06	0.00792	4.53	3.38	6.08	3.28	0.53	5.26	1.41	0.6	0.08	1.15	1.01	0.63	0.23	0.13
	c101247f2p0656	-5.09	8.4e-06	0.01	2.27	13.21	9.14	7.79	1.59	13.19	8.24	1.82	0.63	2.66	1.26	2.98	1.03	0.51
	c101265f10p31917	-5.73	1.11e-05	0.00543	3.42	16.77	13.01	11.71	1.79	9.77	14.62	1.16	1.15	1.54	3.92	2.84	0.58	1.2
	c101293f12p5741	-10.11	0.000199	0.00648	49.5	332	205.38	231.88	45.93	91.86	192.29	8.24	5.22	10.94	45.32	34.26	1.81	7.86
	c101324f17p71049	-8.62	1.46e-05	0.00643	5.08	15.23	8.09	22.06	1.34	14.07	20.72	1.28	0.2	1.59	4.26	0.93	0.75	1.04
	c101371f12p4987	-6.37	1.72e-05	0.01	5.78	13.93	30.84	25.85	2.69	8.08	22.72	1.89	1.35	1.69	4.53	5.99	0.68	1.15
	c10145f1p0743	-4.38	3.03e-05	0.00693	9.84	35.53	43.65	43.96	6.24	35.79	39	5.21	3.52	6.12	18.92	10.38	1.96	2.71
	c101461f22p4777	-9.55	6.36e-05	0.000477	47.21	79.08	53.94	61.31	13.82	34.73	77.46	6.8	3.8	2.73	10.43	9.72	1.87	3.13
	c10146f2p01179	-5.82	1.41e-05	0.00403	3.68	16.75	11.85	18.61	3.18	15.67	19.8	1.71	1.3	1.61	4.56	4.01	0.67	1.53
	c101491f22p71227	-3.93	5.82e-05	0.00685	27.7	74.55	45.99	83.95	22.28	69.19	98.75	11.96	7.46	8.9	28.87	38.95	1.74	9.53
	c101526f4p21405	-4.94	9.5e-06	0.01	3.7	6.77	10.63	11.84	1.04	13.79	16.2	1.53	0.71	1.56	4.58	1.46	1.19	1.9
	c101557f127p301196	-4.59	1.8e-05	0.00347	14.39	18.16	29.18	24.45	2.57	18.55	16.93	4.23	1.74	4.94	9.12	5.41	0.75	0.91
	c10155f1p01627	-4.95	1.25e-05	0.00454	5.03	19.22	15.03	14.43	1.95	14.55	13.36	1.78	1.79	2.51	4.27	4.42	0.62	1.47
	c10180f3p0975	-4.37	5.86e-06	0.01	1.28	7.1	6.69	7.9	0.97	9.19	7.56	1.08	1.16	0.86	2.39	1.86	0.81	1.17
	c10181f1p0714	-4.91	4.99e-06	0.01	3.64	8.07	6.28	3.57	0.15	7.44	3.88	1.25	0.87	0.95	1.85	0.72	0.31	0.76
	c10186f1p1777	-10.31	1.23e-05	0.00454	2.39	15.99	12.84	13.14	1.41	8.56	16.56	0.96	0.21	0.29	2.55	1.65	0.29	0.92
	c10195f1p2454	-5.97	1.79e-05	0.01	4.91	22.96	10.99	21.36	2.76	19.33	32.08	0.98	3.57	2	4.55	5.09	0.74	2.21
	c10197f1p01061	-5.63	3.46e-05	0.0078	13.22	60.18	33.14	36.92	5.17	44.03	31.07	5.29	3.54	5.03	13.62	7.02	1.47	3.8
	c101f14p0972	-4.49	1.65e-05	0.01	3.82	21.89	17.95	24.65	4.23	16.53	25.9	1.68	2.35	2.49	8.08	7.98	0.69	2.32
	c1020f3p11133	-6.29	7.82e-06	0.01	4.7	1.96	14.96	9.6	1.47	7.97	8.56	0.72	0.51	1	2.26	2.27	0.4	0.66
	c10215f1p0644	-5.5	5.63e-06	0.00919	2.69	3.44	10.06	5.8	0.97	6.6	6.69	0.35	0.9	1.53	0.77	2.07	0.52	0.45
	c10216f4p01113	-4.05	1.18e-05	0.00988	5.33	15.72	12.08	20.6	2.24	14.9	14.31	2.6	1.27	3.4	7.34	4.38	0.9	1.16
	c10218f8p01271	-5.03	4.31e-05	0.0024	20.09	56.03	43.58	50.33	8.73	55.33	53.84	8.32	4.09	8.04	13.73	15.33	3.17	4.55
	c102382f7p81200	-3.97	1.1e-05	0.0042	9.91	15.16	17.46	15.59	3.6	5.43	11.75	2.23	1.56	4.17	2.27	4.45	2.15	3.04
	c10239f2p1921	-5.67	2e-05	0.00338	20	17.54	9.19	19.91	4.07	24.92	32.06	3.79	1.26	3.2	6.45	4.12	0.36	3.31
	c1023f8p31320	-6.94	3.44e-06	0.0092	1.5	4.2	1.13	3.09	1.11	5.14	4.73	0.51	0.22	0	1.13	0.7	0.17	0.29
	c10240f1p0759	-10.27	4.7e-06	0.00385	2.33	3.85	7.22	3.94	0.15	4.23	4.8	0.43	0	0.33	0.48	1.04	0	0.3
	c10243f3p12078	-4.98	8.6e-06	0.00482	5.24	13.63	11.74	7.19	1.55	10.4	6.88	1.5	0.68	2.04	2.46	3.75	0.75	0.2
	c102543f5p04681	-3.92	0.000322	0.00722	168.62	520.88	281.79	404.96	74.05	411.89	495.7	73.17	48.97	75.22	148.79	177.01	32.81	45.85
	c102576f3p04898	-6.46	3.98e-06	0.00658	1.64	3.85	3.36	5.9	1.23	3.96	4.92	0.35	0.25	0.42	1.35	1.03	0.07	0.38
	c102652f3p34730	-5.23	6.54e-06	0.00509	2.12	9.28	6.75	8.88	1.45	6.18	7.65	0.77	0.65	1.15	2.59	1.84	0.47	0.62
	c102675f4p04392	-6.69	3.67e-06	0.01	0.85	5.71	2.61	3.87	0.59	3.69	4.84	0.2	0.42	0.45	1.02	0.75	0.15	0.32
	c102703f4p43974	-4.52	3.44e-05	0.01	11.73	61.35	28	36	10.14	36.16	53.44	3.47	4.99	8.5	15.8	13.46	1.61	4.56
	c102719f3p34746	-6.05	4.87e-06	0.01	1.07	6.19	2.93	6.36	0.78	5.67	7.38	0.66	0.48	0.19	2.53	0.6	0.09	0.46
	c10279f1p01763	-9.88	5.77e-06	0.01	2.32	8.17	0.85	5.2	0.92	6.7	8.69	0.04	0.12	0.34	1.92	0.29	0.06	0.55
	c10280f2p01162	-5.75	8.06e-06	0.00789	2.77	9.72	9	11.69	0.99	5.6	11.78	1.09	0.43	1.76	2.98	1.68	0.1	0.94
	c10282f1p3823	-7.89	8.75e-06	0.0087	9.05	2.97	3.64	10.56	1.01	11.81	12.84	1.63	0.25	0.92	2.21	0.81	0.14	0.61
	c102857f3p34329	-4.28	6.93e-06	0.00607	3.21	11.38	7.49	8.65	1.71	8.48	7.07	1.01	1.27	1.61	2.71	3.1	0.72	0.79
	c102863f3p14212	-5.19	2.07e-05	0.00469	8.29	32.25	19.7	27.99	4.62	26.87	17.14	3.24	2.56	3.17	8.1	5.29	1.99	2.05
	c102910f3p24861	-6.86	3.52e-06	0.01	0.94	3.24	3.28	2.9	0.39	5.35	5.16	0.34	0.3	0.39	0.66	0.52	0.16	0.73
	c102924f2p04613	-7.41	8.25e-06	0.00327	2.47	9.41	7.88	6.7	2.15	7.97	12.79	0.95	0.56	0.54	1.97	1.47	0.46	0.72
	c102942f3p34716	-6.19	4.43e-05	0.0023	16.5	47.84	61.15	34.23	13.11	41.98	65.43	6.77	3.66	4.43	11.17	12.73	3.02	3.51
	c102947f3p34458	-7.86	4.6e-06	0.01	1.06	7.22	3.92	6.49	0.3	3.97	4.27	0.27	0.54	0.68	1.54	0.15	0.13	0.16
	c102953f3p14928	-4.96	3.59e-06	0.01	1.93	2.74	3.94	3.83	1.05	6.6	4.06	0.23	0.68	0.92	1.37	0.97	0.36	0.33
	c102992f3p14970	-5.42	1.31e-05	0.00913	5.43	9.59	10.13	19.12	2.47	22.24	16.49	1.68	0.79	1.39	5.61	3.22	1.37	1.7
	c102997f3p14444	-6.73	6.95e-06	0.00535	2.26	10.43	7.18	8.73	0.84	6.1	6.92	0.79	0.59	0.72	2.07	1.38	0.25	0.53
	c10299f3p21942	-6.76	8.49e-06	0.00829	2.61	12.67	11.04	11.64	1.31	4.58	8.52	0.46	0.6	1.68	1.74	1.48	1.04	0.75
	c103108f3p04635	-6.94	6.53e-06	0.00739	2.08	8.65	4.94	5.97	1.13	10.65	6.14	0.91	0.69	0.73	1.19	1.17	0.53	0.47
	c10313f1p1576	-6.81	1.22e-05	0.0023	8.59	16.92	14.7	8.26	1.35	12.9	11.89	2.45	1.73	1.44	1	2.85	0.39	1.09
	c103161f2p14697	-9.64	1.08e-05	0.00341	2.51	13.31	12.64	9.09	2.3	7.38	14.91	0.55	0.53	0.76	2.34	1.15	0.5	0.62
	c103170f2p24973	-6.62	6.43e-06	0.00632	2.04	9.59	8.13	4.93	0.86	6.04	7.83	0.39	0.58	1.02	2.25	0.85	0.47	0.4
	c103182f2p04832	-5.74	8.85e-06	0.00873	5.88	7.28	11.22	7.41	1.1	6.83	16.89	1.23	0.37	1.42	2.94	2.83	0.21	0.86
	c103185f2p05045	-5.04	4.82e-06	0.00535	1.81	5.83	5.32	5.68	0.76	5.7	6.17	0.59	0.59	0.73	2.12	1.22	0.33	0.62
	c103193f2p14846	-5.97	8.36e-06	0.00361	3.04	13.22	8.74	8.8	2.1	7.81	8.61	0.83	0.87	1.16	2.49	2.17	0.51	0.74
	c103196f2p05212	-5.5	3.44e-06	0.01	1.23	5.01	4.77	4.36	0.25	2.42	3.71	0.57	0.26	0.84	1.33	0.67	0.09	0.2
	c103235f2p14117	-7.24	5.31e-06	0.00615	1.81	6.46	8.48	4.13	0.97	3.74	6.23	0.38	0.29	0.9	0.64	1.83	0.16	0.18
	c103260f2p15053	-6.37	4.37e-06	0.00492	1.2	6.24	4.15	3.74	1.02	4.98	5.34	0.29	0.41	0.6	1.34	0.77	0.2	0.56
	c103273f2p04834	-4.71	8.42e-06	0.00725	3.46	12.2	6.19	10.98	1.62	11.9	10.21	1.14	1.25	1.71	3.47	2.93	0.67	0.83
	c103292f2p14517	-5.27	4.99e-06	0.00687	2.08	5.98	3.09	6.88	1.07	6.26	6.74	0.81	0.65	0.65	1.63	1.42	0.45	0.49
	c103298f2p24534	-4.99	5.23e-06	0.00392	2.32	5.62	6.38	6.38	0.95	5.77	6.52	0.98	0.43	0.82	2.13	1.7	0.27	0.47
	c103299f2p24448	-5.96	5.27e-06	0.00625	1.53	6.53	4.93	5.01	0.89	7.74	6.25	0.67	0.49	0.95	1.43	1.24	0.28	0.46
	c103335f2p14442	-4.97	1.17e-05	0.00413	6.5	15.27	7.75	17.19	3.12	16.87	10.61	2.01	0.76	1.96	5.16	3.59	1.08	1.01
	c10339f3p11419	-3.64	1.93e-05	0.01	12.04	18.9	27.41	34.38	3.05	30.15	21.65	6.66	3.25	4.75	11.3	11	1.42	2.18
	c10341f1p01584	-6.19	4.72e-06	0.0075	1.15	4.27	5.57	6.86	0.78	4.29	6.26	0.18	0.1	1.03	2	0.73	0.14	0.52
	c103420f2p04334	-8.8	3.21e-06	0.01	1.52	3.33	4.95	0.71	0.48	3.1	4.41	0.27	0.18	0.3	0.27	0.56	0.23	0.29
	c103422f2p34255	-7.05	4.24e-06	0.00453	0.73	4.48	5.27	4.32	0.91	4.62	4.94	0.28	0.36	0.43	1.3	0.63	0.26	0.32
	c103427f2p04512	-6.99	2.03e-05	0.00521	4.64	18.03	18.56	25.16	2.57	28.2	28.05	1.57	2.22	1.81	5.29	3.8	1.19	2.02
	c103458f2p14999	-4.93	4.67e-06	0.01	1.58	5.35	5.96	6.57	0.7	3.68	6.97	0.86	0.39	0.71	2.27	0.88	0.33	0.8
	c103480f2p14871	-6.86	4.57e-06	0.00546	1.02	5.28	5.02	4.3	0.63	5.4	5.87	0.34	0.41	0.48	1.19	0.9	0.25	0.45
	c103508f2p14475	-6.28	4.6e-06	0.00438	1.77	5.84	3.67	5.8	1.02	5.96	4.95	0.66	0.32	0.59	1.25	0.78	0.45	0.57
	c103565f2p03872	-5.74	1.21e-05	0.00392	7.9	16.49	7.21	14.8	2.48	9.4	18.46	2.54	0.93	1.74	3.44	2.35	0.95	1.42
	c103576f2p14884	-5.39	8.76e-06	0.00874	1.75	12.55	11.31	10.15	1.03	10.62	9.76	1.11	1.04	1.81	3.23	1.59	0.71	1.14
	c103590f2p25026	-7.66	3.79e-06	0.00642	1.45	5.72	4.26	3.78	0.41	3.85	3.61	0.38	0.48	0.35	0.3	0.88	0.2	0.43
	c10359f1p11107	-5.52	8.51e-06	0.0078	2.01	10.79	9.44	11.19	2.25	5.87	13.54	0.13	0.67	1.36	2.91	3.29	0.4	1.21
	c103617f2p24033	3.69	-5e-05	0.002	28.04	0.33	0.87	0.13	40.13	4.32	1.7	41.87	39.99	42.12	35.78	36.08	41.98	41.14
	c103629f2p24878	-5.39	7.63e-06	0.00263	3.17	8.32	8.8	10.11	1.73	9.05	7.71	0.79	0.64	1.82	2.48	1.85	0.73	0.76
	c103635f2p04655	-8.76	3.8e-06	0.00569	1.09	4.48	5.68	3.54	0.43	3.65	2.99	0.35	0.24	0.39	0.62	0.71	0.1	0.09
	c103644f2p04593	-7.42	8.99e-06	0.00416	3.45	6.95	9.23	7.07	1.72	14.44	11.19	1.09	0.47	1.19	1.93	1.49	0.56	0.57
	c10364f1p01326	-6.1	1.24e-05	0.00497	5.32	11.19	17.66	16.53	1.88	7.81	18.05	1.23	1.38	1.65	3.99	3.25	0.59	0.76
	c103654f2p24809	-9.38	3.23e-06	0.00862	1.26	3.97	3.43	2.23	0.75	3.04	4.2	0.31	0.15	0.41	0.34	0.52	0.07	0.21
	c103668f2p14307	-5.01	1.97e-05	0.00479	8.45	29.32	21.52	19.96	2.82	25.59	24.23	3.19	2.29	3.23	9.22	5.31	0.81	2.28
	c103677f2p05020	-5.13	5.85e-06	0.00896	1.94	9.28	5.84	7.73	0.9	5.56	6.92	0.55	0.17	1.83	2.49	1.35	0.4	0.66
	c103689f2p04513	-6.16	5.59e-06	0.00859	1.92	9.04	4.75	4.37	0.89	6.92	6.88	0.45	0.88	0.96	1.14	0.98	0.77	0.47
	c1036f10p31007	-4.27	1.41e-05	0.00963	5.78	13	15.36	21.12	2.12	23.63	19.06	2.37	1.57	3.84	6.24	5	2	2.41
	c103704f2p14756	-4.87	7.71e-06	0.00328	4.66	8.8	7.44	10.25	1.18	7.93	10.73	1.61	0.98	1.24	3.86	1.2	0.68	0.9
	c103713f2p04399	-4.02	5.44e-06	0.00738	3.15	7.9	5.21	8.3	1.4	4.83	7.57	1.47	0.95	0.91	3.08	2.11	0.25	0.76
	c103717f2p14794	-8.28	5.07e-06	0.0078	1.06	6.02	3.75	5.69	0.27	6.66	6.29	0.56	0.3	0.46	0.9	0.67	0.3	0.41
	c103733f2p34857	-7.34	5.31e-06	0.00404	1.96	6.06	4.3	6.32	0.5	5.54	6.98	0.46	0.6	0.3	1.14	1.02	0.05	0.76
	c103734f2p04532	-5.43	1.26e-05	0.00302	5.63	12.03	17.81	15.97	1.77	14.03	15.1	1.87	1.18	2.69	4.65	2.59	0.84	1.35
	c10373f2p01438	-5.7	2.42e-05	0.01	13	32.68	43	22.11	0.14	14.87	32.93	5.54	3.15	7.37	7.41	0.25	1.01	3.14
	c103753f1p04614	-6.69	3.74e-06	0.00811	1.05	3.84	4.76	5.01	0.49	4.41	4.04	0.32	0.5	0.48	0.99	0.68	0.17	0.4
	c103764f1p05057	-13.94	4.79e-06	0.00406	1.21	6.21	4.79	4.36	0.85	2.39	6.37	0.04	0.09	0.09	0.73	0.57	0.09	0.27
	c103767f1p04715	-5.07	7.64e-06	0.00551	5.04	11.85	12.16	5.12	1.69	7.05	7.22	1.77	0.99	2.2	1.44	2.29	0.55	0.66
	c103771f1p05034	-6.06	6.08e-06	0.0098	2.04	10.74	5.54	5.67	0.92	6.8	6.3	0.58	0.89	0.99	1.82	1.13	0.33	0.53
	c103773f1p0713	-3.88	1.36e-05	0.00823	8.3	12.99	16.01	26.1	2.54	18.17	16.87	5.3	2.44	5.18	6.34	3.58	0.94	2.28
	c103780f1p04892	-5.91	4.36e-06	0.01	1.67	6.7	2.24	5.04	0.69	6.68	4.22	0.73	0.28	0.36	1.6	0.9	0.16	0.57
	c103797f1p24616	-5.28	6.82e-05	0.01	25.57	125.22	78.9	86.4	8.31	44.55	82.92	8.7	6.26	13.19	26.28	22.57	2.11	6.42
	c103803f1p05306	-5.71	3.68e-06	0.01	1.48	6.03	5.78	3.2	0.56	2.68	3.42	0.48	0.29	0.65	1.32	0.84	0.15	0.33
	c103830f1p04814	-5.94	6.36e-06	0.00592	1.98	7.82	6.42	9	1.15	4.94	8.71	0.62	0.65	1.08	2.13	1.22	0.3	0.75
	c103844f1p24415	-7.01	3.53e-06	0.00872	1.43	4.46	3.27	3.19	0.79	5.08	3.45	0.37	0.29	0.34	1.2	0.46	0.23	0.2
	c103881f1p04329	-6.25	6e-06	0.00438	2.01	6.03	6.15	7.54	0.95	5.8	8.69	0.53	0.68	0.43	1.98	1.15	0.36	0.81
	c103890f1p25121	-6.54	4.18e-06	0.01	2.05	6.53	1.56	3.91	1.02	6.61	3.82	0.52	0.31	0.41	0.63	0.49	0.74	0.79
	c103891f1p25126	-8.63	1.75e-05	0.00247	6.47	18.2	22.57	9.32	6.55	12.34	27.1	2.32	0.87	1.05	3.14	2.84	0.74	0.93
	c10389f1p01175	-6.55	5e-06	0.00478	1.57	5.8	4.21	6.6	0.66	5.83	5.72	0.44	0.32	0.7	1.81	0.78	0.09	0.49
	c103901f1p03946	-5.97	2.85e-05	0.00378	8.95	41.12	34.27	33.9	4.45	30.59	28.92	2.59	2.88	4.36	10.19	5.65	1.64	3.18
	c103903f1p05058	-10.54	2.87e-06	0.01	0.05	3.82	1.86	3.2	0.68	3.23	3.73	0.16	0.19	0.04	0.63	0.22	0.15	0.17
	c103928f1p05072	-6.47	6.93e-06	0.00346	3.04	9.55	5.03	5.81	2.2	10.45	6.27	0.88	0.7	0.52	1.86	1.38	0.49	0.71
	c10392f6p3890	-6.05	1.83e-05	0.01	5.99	32.15	12.33	18.73	3.46	27.93	14.63	1.84	2.94	2.13	6.69	4.27	0.5	0.66
	c103947f1p14534	3.29	-0.000139	0.00297	93.75	2.23	4.69	2.9	128.02	8.87	6.34	121.69	121.4	126.51	107.52	99.52	115.95	118.81
	c103953f1p04021	-5.06	4.21e-06	0.00739	1.38	4.62	5.32	4.51	0.72	4.65	6.02	0.66	0.51	0.69	1.7	1.17	0.22	0.42
	c103973f1p1951	-4.55	4.62e-06	0.00792	1.59	5.94	5.88	4.92	1.01	6.7	5.04	1.28	0.85	0.41	2.22	0.94	0.48	0.67
	c103974f1p04863	-11.92	2.93e-06	0.00972	1.17	3.05	2.97	5.02	0.32	2.32	1.31	0.15	0.09	0.23	0.61	0.18	0	0.09
	c103975f1p03930	-4.25	2.18e-05	0.00988	8.15	21.94	35.79	33.13	3.47	24.65	29.43	3.57	2.34	7.55	12.66	6.91	1.07	2.74
	c103993f1p04019	-6.13	5.31e-06	0.00487	1.88	7.4	5.09	4.36	1.03	7.28	5.81	0.67	0.58	0.79	1.11	1.22	0.39	0.6
	c104008f1p24656	-6.31	7.42e-06	0.00724	2.81	13.06	5.66	6.05	1.74	8.45	8.05	0.92	0.81	0.78	1.63	1.98	0.34	0.81
	c104014f1p05022	-42.45	2.68e-06	0.00787	0.81	3.17	2.18	1.45	0.41	2.35	3.71	0.03	0.00825	0.03	0.05	0.11	0.04	0.06
	c104018f1p04770	-5.63	1.28e-05	0.00771	7.53	8.25	17.4	13.61	2.14	23.35	10.16	2.6	0.63	2.39	4.37	2.43	1.29	0.95
	c104050f1p04723	-5.5	0.000398	0.00413	87.62	445.17	527.63	453.04	98.22	545.05	458.99	26.02	35.12	49.65	202.75	96.75	33.19	32.2
	c104051f1p04543	-16.36	1.92e-05	0.00235	7.03	21.21	27.67	7.43	4.85	15.07	21.81	1.61	0.48	0.84	1.64	0.84	0.54	0.47
	c104058f1p04835	-10.14	1.03e-05	0.0045	3.38	16.79	10.04	8.88	1.26	9.7	8.79	0.47	0.31	0.98	2.31	0.93	0.23	0.58
	c104060f1p05047	-5.36	1.15e-05	0.00156	7.49	10.85	11.76	15.87	2.54	13.06	12.81	1.4	0.86	2.3	3.82	4.43	0.47	0.61
	c104076f1p04675	-5.67	3.37e-06	0.01	1.67	5.97	4.73	2.81	0.86	2.96	2.75	0.56	0.37	0.82	0.82	0.85	0.07	0.35
	c104078f1p05002	-4.92	0.000346	0.01	111.54	592.39	527.86	395.12	57.34	278.12	389.72	48.7	34.43	75.98	153.76	115.2	18.38	31.57
	c104080f1p04569	-7.59	6.67e-06	0.002	3.2	9.09	5.95	4.28	1.88	7.9	7	0.61	0.45	0.53	1.17	1.65	0.44	0.34
	c104083f1p04536	-7.41	3.52e-06	0.00844	1.04	3.86	3.18	3.86	0.57	4.83	4.24	0.46	0.34	0.4	0.62	0.63	0.15	0.31
	c104107f1p04235	-10.37	3.8e-06	0.0048	1.28	3.28	3.63	3.08	0.75	4.97	4.98	0.09	0.15	0.3	0.68	0.51	0.08	0.31
	c104109f1p04483	-7.99	4.6e-06	0.00412	1.05	4.59	3.55	5.48	0.98	4.91	6.32	0.13	0.25	0.1	1.29	0.83	0.17	0.59
	c104112f1p14759	-7.5	5.47e-06	0.00408	2.02	6.5	3.97	4.31	1.53	5.26	8.81	0.61	0.43	0.43	1.37	0.8	0.26	0.44
	c104127f1p04608	-9.71	3.23e-06	0.01	1	2.36	1.52	5.24	0.45	3.81	3.95	0.13	0.05	0.15	0.75	0.44	0.12	0.25
	c104132f1p04509	-7.56	3.39e-06	0.01	0.74	6.1	3.54	2.76	0.64	3.66	2.55	0.15	0.25	0.47	0.7	0.75	0.15	0.18
	c104139f1p04444	-5.45	3.71e-06	0.01	1.28	3.29	4.26	4.66	1.01	4.98	4.93	0.53	0.49	0.78	1.08	0.93	0.2	0.45
	c104166f1p04674	-5.43	3.6e-06	0.01	1.42	6.07	3.23	3.91	0.82	4.22	3.81	0.54	0.32	0.6	1.4	0.97	0.19	0.31
	c104207f1p04456	-5.69	5.84e-06	0.00832	1.86	6.35	3.79	8.63	1.06	7.69	7.65	0.45	0.54	0.71	2.85	0.99	0.5	0.47
	c104214f1p24501	-6.75	8.09e-06	0.00264	3.28	10.86	7.59	9.57	1.28	8.3	8.36	0.99	0.59	1.24	1.9	1.53	0.35	0.71
	c104222f1p04327	-5.25	8.12e-06	0.0042	3.01	9.41	11.78	8.89	1.25	9.63	8.91	0.43	0.86	1.2	3.74	2.31	0.64	0.9
	c104247f1p14418	-4.19	1.27e-05	0.00826	4.4	19.21	13.76	14.27	2.57	17.13	18.92	2.05	1.72	3.78	6.26	4.53	1.16	2.02
	c10426f8p1661	-12.66	7.58e-06	0.00617	1.5	9.38	9.04	6.17	0.79	10.84	4.66	0.34	0.31	0.69	0.87	0.54	0.34	0.25
	c104281f1p04993	-5.2	3.74e-06	0.01	1.73	4.42	4.97	3.79	1.37	5.32	3.1	0.55	0.23	0.69	1.52	0.87	0.6	0.29
	c104303f1p04581	-6.88	1.11e-05	0.00301	3.86	15.62	13.7	12.42	1.89	10.29	10.09	1.12	1	1.68	2.76	1.97	0.39	0.95
	c104345f1p34840	-5.14	1.12e-05	0.00632	3.14	17.05	12.34	12.34	1.88	14.36	13.09	1.17	1.78	2.37	3.97	3.04	0.81	1.3
	c104359f1p04467	-8.67	4.06e-06	0.00707	1.74	4.51	2.12	7	0.86	3.21	3.98	0.28	0.1	0.05	0.98	0.7	0.05	0.53
	c104403f1p02324	-13.04	2.7e-06	0.01	1.22	0.76	1.93	3.29	0.47	4.63	2.42	0.1	0.07	0.07	0.53	0.18	0.1	0.09
	c104433f1p21538	-5.44	7.07e-06	0.00738	2.58	8.37	3.89	11.95	2.07	8.3	8.12	1.26	0.27	0.79	2.9	2.21	0.29	0.6
	c104441f1p04929	-6.38	5.03e-06	0.00583	1.53	6.27	3.97	5.38	0.74	5.98	6.98	0.49	0.46	0.63	1.7	0.88	0.11	0.57
	c104445f1p04301	-6.53	1.62e-05	0.00421	5.8	16.51	12.61	15.97	2.83	25.15	21.53	2	1.43	1.51	4.22	2.72	1.56	1.93
	c104455f1p04585	-5.68	6.56e-06	0.00595	2.58	10.03	6.42	5.21	1.09	8.32	7.95	0.93	0.94	0.89	1.91	1.5	0.48	0.66
	c104460f1p14569	-6.95	5.66e-06	0.01	1.56	7.06	3.83	5.19	0.89	9.68	6.1	0.43	0.54	0.78	1.25	0.99	0.36	0.59
	c10446f4p0469	-4.73	2.67e-05	0.00478	22.41	31.15	33.97	10.14	6.32	39.04	37.88	9.66	3.27	6.28	2.82	11.92	1.67	2.58
	c104495f1p04937	-7.25	3.74e-06	0.01	1.67	6.69	3.05	2.15	0.51	4.76	3.43	0.17	0.28	0.45	1.41	0.36	0.12	0.28
	c104508f1p04815	-6.5	3.95e-06	0.00655	1.36	5.57	2.9	2.82	0.97	5.1	5.26	0.29	0.46	0.5	0.63	1.02	0.33	0.45
	c104512f1p22265	-4.96	1.19e-05	0.00217	5.25	11.16	15.19	14.04	3.77	16.72	12.34	2	0.99	2.91	4.45	3.33	0.94	1.2
	c104540f1p14784	-8.66	3.28e-06	0.00888	1.06	4.28	3.35	2.75	0.84	2.37	4.75	0.27	0.22	0.22	0.69	0.46	0.28	0.1
	c104568f1p04296	-5.04	5.36e-06	0.01	1.33	6.61	6.04	8.71	0.87	5.41	6.28	0.45	0.67	1.06	2.66	1.04	0.36	0.75
	c104571f1p04261	-3.85	4.85e-06	0.01	2.41	8.16	3.38	7.95	1.65	5.16	6.04	0.74	0.89	1.03	2.73	2.87	0.33	0.45
	c104573f1p04319	-6.32	4.4e-06	0.00563	1.26	5.33	4.03	5.89	0.6	5.07	4.72	0.62	0.28	0.3	1.76	0.68	0.26	0.37
	c104610f1p04906	-4.77	6.69e-06	0.00828	2.41	10.84	7.34	8.35	1.09	7.82	6.97	1.09	1.39	1.25	2.65	1.82	0.51	0.67
	c104631f1p14600	-4.97	1.17e-05	0.00651	3.08	19	12.07	13.2	2.93	12.89	15.1	1.07	1.12	2.08	4.83	4.14	0.93	1.57
	c104666f1p24647	-6.45	5.73e-06	0.00376	2.57	8.98	4.61	6.42	1.24	5.22	5.92	0.3	0.65	0.87	1.42	1.55	0.28	0.34
	c104669f1p24425	-9.34	6.83e-06	0.00502	1.67	8.12	5.15	6.11	1.03	10.42	6.87	0.25	0.16	0.7	1.58	0.66	0.55	0.32
	c104682f1p24922	-5.44	3.62e-06	0.01	1.27	5.56	3.7	4.54	0.57	4.8	3.32	0.45	0.35	0.56	1.44	1.07	0.09	0.4
	c104687f1p14780	-5.75	1.46e-05	0.00339	5.44	20.9	14.42	15.71	2.5	18.08	15.96	1.67	1.58	2.39	4.82	3.29	1.05	1.36
	c104688f1p04601	-6.39	3.61e-06	0.00857	1.21	6.03	2.39	3.18	0.96	3.67	4.5	0.34	0.48	0.35	0.83	1.14	0.15	0.15
	c10468f1p01021	-4.83	6.54e-06	0.00716	3.64	10.64	9.76	7.66	1.53	4.68	5.58	0.87	0.98	1.41	1.62	2.67	0.44	1.02
	c104691f1p15302	-7.23	6.2e-06	0.01	1.5	6.29	8.2	3.62	0.73	7.74	9.56	0.35	0.62	1.47	0.93	0.82	0.25	0.77
	c104699f1p04723	-7.17	6.23e-06	0.00531	1.6	7.92	6.98	9.05	1.15	4.33	6.48	0.34	0.41	0.81	1.81	1.12	0.26	0.49
	c1046f5p0835	-4.99	1.69e-05	0.01	6.69	13.58	32.95	14.91	2.82	25.06	18.96	2.41	1.5	5.27	6.95	4.38	1.08	1.46
	c104703f1p05232	-6.31	8.07e-06	0.01	2.02	13.44	3.6	9.53	1.63	10.18	9.56	0.76	0.65	0.49	2.8	2.14	0.45	0.64
	c104705f1p45092	-5.61	1.63e-05	0.007	6.32	28.17	13.99	21.84	3.26	15.92	15.44	2.26	2.2	1.84	6.48	3.67	0.66	1.58
	c104708f1p45111	-3.96	7.92e-05	0.00539	48.45	97.6	87.46	109.95	21.2	73.26	140.56	17.75	9.66	15.15	45.35	41.01	4.33	12.73
	c104719f1p04567	-11.48	2.8e-06	0.01	0.78	2.57	4.25	2.97	0.46	2.26	2.86	0.08	0.09	0.23	0.38	0.4	0.15	0.07
	c104721f1p04616	-6.89	4.37e-06	0.00859	1.26	4.95	4.21	3.43	0.53	6.97	5.09	0.56	0.45	0.67	0.86	0.5	0.29	0.5
	c104723f1p03272	-5.16	7.66e-06	0.00483	3.31	9.8	10.04	7.85	0.76	9.99	8.41	1.33	0.48	1.6	2.78	1.85	0.81	0.87
	c104729f1p14768	-6.1	9.81e-06	0.00722	3.49	17.24	8.02	9.45	1.89	10.27	11.01	1.12	0.96	1.23	2.97	2.26	0.42	1.09
	c104734f1p04829	-7.44	5.22e-06	0.00298	3.23	5.14	5.05	3.2	0.65	6.46	7.17	0.78	0.39	0.75	0.41	0.99	0.28	0.55
	c104766f1p05124	-4.77	6.79e-06	0.00395	3.2	9.66	7.42	7.34	1.32	8.61	7.56	1.18	0.86	1.45	2.53	2.05	0.66	0.73
	c104770f1p94534	-4.67	2.71e-05	0.0045	15.19	40.83	39.04	37.46	4.77	20.13	28.87	5.63	3.77	6.63	11.07	8.31	1.68	2.8
	c104794f1p11857	-6.14	4.97e-06	0.01	0.73	6.93	6.99	5.59	0.81	3.79	6.14	0.36	0.38	0.33	2.05	1.05	0.18	0.7
	c104807f1p14808	-5.37	3.55e-06	0.01	1.93	4.19	2.35	4.4	0.73	5.26	4.36	0.52	0.34	0.23	1.48	1	0.28	0.48
	c104808f1p04670	-9.8	4.24e-06	0.01	1.17	2.85	2.24	6.34	0.51	6.18	4.87	0.22	0.06	0.05	0.83	0.95	0.12	0.23
	c104829f1p04955	-9.53	1.11e-05	0.00859	1.78	16.25	12.01	14.7	2.33	4.3	12.92	0.53	0.4	1.46	2.56	0.88	0.09	0.82
	c10483f8p0952	-15.47	3.51e-06	0.0052	0.78	1.62	4.69	2.67	0.71	3.75	4.67	0	0.04	0.32	0.17	0.48	0.12	0.09
	c104848f1p05403	-6.49	4.54e-06	0.01	1.31	4.12	3.22	4.92	0.6	7.95	5.78	0.28	0.45	0.44	1.68	0.74	0.13	0.56
	c104865f1p04608	-5.52	4.46e-06	0.00583	1.9	6.21	5.8	4.29	0.92	5.38	4.7	0.42	0.53	1.03	1.32	1.05	0.48	0.46
	c10486f1p0606	-4.58	6.5e-05	0.00621	27.31	90.12	119	58.2	15.34	63.41	79.34	12.86	8.34	22.05	21.49	25.02	3.13	5.86
	c104927f1p14232	-5.13	1.13e-05	0.01	4.3	15.86	6.01	16.54	3.35	10.07	18.26	1.56	0.92	0.75	6.91	2.49	0.26	1.61
	c10492f1p01619	-6.2	4.25e-06	0.00625	1.3	4.92	3.08	4.3	1.06	4.75	6.65	0.64	0.15	0.7	1.68	0.57	0.07	0.39
	c104939f1p04452	-6.04	3.35e-06	0.01	1.83	4.77	3.02	3.97	0.82	3.19	3.63	0.3	0.48	0.48	0.65	0.98	0.18	0.46
	c104940f1p35178	-5.82	2.13e-05	0.00404	10.2	28.49	19.18	26.59	2.14	30.56	19.8	4.14	2.5	3.32	7.64	2.24	1.9	1.79
	c104998f1p05051	-5.38	4.97e-06	0.00429	2.43	6.31	5.52	5.65	1.02	6.23	5.53	0.43	0.49	0.88	2.47	1.01	0.27	0.54
	c105034f1p04220	-6.2	6.51e-06	0.01	1.2	9.37	3.92	9.31	1.05	8.38	7.36	0.57	0.74	0.63	2.02	1.52	0.41	0.66
	c105036f1p05103	-12.54	3.67e-05	0.00156	14.12	42.65	45.97	18.85	11.86	24.24	48.11	3.29	1.19	1.7	4.8	2.69	1.53	1.22
	c105044f1p24618	-6.59	1.53e-05	0.00797	3.73	24.5	12.1	14.26	2.21	18.95	18.78	1.35	1.93	1.87	3.76	3.14	0.7	1.58
	c105094f1p15067	3.96	-0.00343	0.0024	1510.43	34.97	70.72	48.99	2708.35	227.72	117.83	2631.95	3026.33	2460.22	1848.76	2066.12	3222.47	3417.05
	c10510f6p11086	-5.53	1.01e-05	0.01	5.58	9.18	5.5	15.64	0.67	14.05	15.16	0.62	1.57	1.32	5.09	2.46	0	0.85
	c105149f1p04488	-4.89	5.27e-06	0.00413	4.47	6.62	6.56	5.91	1.27	6.25	4.31	1.54	0.68	0.78	2.17	1.48	0.15	0.44
	c105153f1p04563	-3.62	8.42e-06	0.01	9.76	13.23	4.55	11.55	1.5	13.08	9.24	2.02	1.33	2.85	5.91	2.76	1.17	1.33
	c105163f1p04784	-6.02	5.13e-06	0.00939	1.89	8.44	4.17	4.55	0.63	6.12	6.17	0.65	0.71	0.59	1.33	1.05	0.21	0.76
	c105170f2p05055	-5.45	4.12e-06	0.00736	2.01	5.88	3.45	2.56	0.98	5.55	5.69	0.97	0.26	0.97	0.69	1.32	0.13	0.44
	c105171f1p25266	-5.83	9.16e-06	0.00279	4.98	9.26	12.21	13.36	1.56	8.85	7.7	1.6	0.61	1.26	3.31	2.04	0.38	0.74
	c105190f1p04365	-5.67	6.35e-06	0.00312	3.44	8.62	8.34	6.76	1.13	4.87	6.88	0.77	0.52	1.08	2.11	1.36	0.61	0.62
	c105213f1p94440	-4.6	3.14e-05	0.01	8.07	53.02	32.73	43.22	5.34	38.58	36.16	4.25	5.46	6.36	15.22	9.89	2.26	3.71
	c105227f1p34618	-6.65	6.69e-06	0.00179	3.57	7.35	7.35	5.42	1.77	8.21	7.86	1.13	0.41	0.82	1.79	1.09	0.49	0.53
	c10522f1p0837	-23.61	9.55e-06	0.00279	3.68	12.61	12.34	4.84	1.68	5.42	10.19	0.28	0.15	0.19	0.92	0.51	0	0.1
	c105246f1p54986	-5.71	1.01e-05	0.01	3.18	14.67	7.4	16.03	1.19	12.13	10.49	1	0.95	1.11	4.77	1.58	1.12	0.87
	c105260f1p04146	-5.71	5.38e-06	0.00387	2.37	7.47	5.07	6.1	1.03	4.76	7	0.74	0.66	0.9	1.62	1.11	0.27	0.62
	c10526f6p0994	-9.52	9.42e-06	0.00639	3.25	7.16	16.6	7.55	1.52	6.43	12.51	0.98	0.46	1.68	1.42	0.88	0.11	0.25
	c10529f1p01633	-4.21	4.49e-06	0.00948	1.51	6.22	3.95	6.53	1.37	5.19	6.15	0.77	0.51	0.69	2.82	1.82	0.27	0.46
	c105302f1p11278	-5.85	1.01e-05	0.00188	9.1	10.74	14.81	10.1	1.55	10.18	7.22	3.32	0.88	1.72	2.26	1.41	0.96	0.36
	c105310f1p34405	-7.06	3.5e-06	0.01	1.1	5.48	3.28	3.51	0.43	2.38	4.73	0.49	0.35	0.15	1.18	0.33	0.13	0.33
	c105315f1p04970	-5.52	3.79e-06	0.00982	1.38	4.81	3.47	3.89	0.63	5.63	4.94	0.61	0.4	0.56	1.32	0.8	0.42	0.38
	c105327f1p04760	-6.57	5.77e-06	0.00335	2.07	6.77	3.97	6.55	1.35	6.98	7.37	0.69	0.24	0.65	2.01	1.06	0.21	0.47
	c10533f1p01636	-14.2	2.62e-06	0.01	2.01	3.6	2.36	2.65	0.63	1.26	1.93	0.2	0.06	0.15	0.22	0.28	0.08	0.03
	c105371f1p04769	-7.54	6.47e-06	0.00618	1.76	9.09	6.89	4.13	0.98	8.64	7.15	0.51	0.5	1.08	1.23	0.78	0.49	0.53
	c10537f1p0783	-7.66	4.59e-06	0.01	0.79	5.38	5.1	2.17	0.73	6.96	6.2	0.29	0.53	0.19	0.85	0.98	0.14	0.59
	c105402f1p05092	-12	6.78e-06	0.00237	2.24	6.56	8.73	2.87	2.11	6.52	8.65	0.54	0.21	0.34	0.82	0.61	0.27	0.36
	c105412f1p11948	-6.78	1.47e-05	0.0051	3.62	12.85	19.95	15.43	1.42	19.63	18.68	0.73	0.7	2.29	4.58	2.45	1.15	1.61
	c105419f1p04533	-7.66	6.73e-06	0.00429	2.64	10.38	5.7	8.33	1.39	4.26	7.24	0.51	0.54	1.03	1.29	1.13	0.34	0.38
	c105428f5p0562	-4.69	1.77e-05	0.00835	7.94	19.34	18.64	27.55	2.04	21.76	24.13	3.18	1.85	3.1	11.92	2.38	0.4	3.06
	c10544f1p31582	-4.67	1.82e-05	0.01	12.22	30.15	20.82	10.22	2.47	31.77	16.46	5.37	4.36	5.36	2.46	5.98	1.42	1.62
	c10545f1p0597	-5.27	2.91e-05	0.00352	10.38	32.33	46.8	31.63	6.02	35.19	30.85	5.61	3.27	3.81	11.64	7.4	2.63	2.32
	c105483f1p04359	-4.12	0.000335	0.00625	155.47	381.67	352.36	444.69	64.76	525.31	495.17	71.38	42.75	69.75	144.22	184.94	26.11	47.55
	c105515f1p14678	-7.02	3.35e-06	0.01	1.35	3.93	2.66	3.56	0.7	4.43	3.93	0.38	0.23	0.45	0.83	0.47	0.17	0.39
	c105526f1p04357	-9.8	3.54e-06	0.00633	0.85	4.46	3.19	3.54	0.55	3.55	4.52	0.24	0.12	0.26	0.53	0.6	0.03	0.33
	c105548f1p04645	-5.65	4.83e-06	0.0046	2.16	6.86	4.07	5.59	0.73	5.83	5.12	0.54	0.46	1.03	1.65	0.95	0.31	0.43
	c105562f1p04573	-8.02	2.93e-06	0.01	1.11	2.86	3.16	2.68	0.67	3.4	3.72	0.52	0.2	0.18	0.58	0.51	0.02	0.18
	c105569f1p04576	-7.05	3.26e-06	0.01	1.47	5.11	2.25	3.44	0.33	2.14	4.76	0.37	0.23	0.34	1.25	0.15	0.07	0.35
	c10558f1p01790	-4.68	4.34e-06	0.00918	1.38	6.69	5.29	4.84	0.87	4.68	5.12	0.71	0.72	0.72	2.17	1.18	0.19	0.49
	c105594f1p04909	-4.75	3.98e-06	0.01	1.68	6.36	5.24	5.09	0.64	3.47	3.88	0.3	0.66	0.95	2.24	0.52	0.41	0.47
	c10559f1p0624	-4.95	4.05e-05	0.01	10.72	49.06	52.78	39.26	4.84	70.1	49.28	6.92	6.06	10.32	11.93	10.71	4.13	5.71
	c105600f1p13863	-5.29	7e-06	0.00827	1.99	9.87	4.78	7	1.89	10.35	9.45	0.87	1.06	0.96	1.56	2.54	0.52	1.05
	c105605f1p1939	-5.75	7.24e-06	0.00305	2.64	6.85	11.16	3.99	3.55	9.2	8.12	1.35	0.27	0.56	2.38	2.19	0.24	0.94
	c105622f1p04475	-310.67	1.06e-05	0.01	1.61	13.57	4.61	4.53	0.75	12.64	16.46	0.03	0	0.02	0.09	0.03	0	0
	c105646f1p04525	-4.71	5.55e-05	0.00807	19.91	68.44	64.79	94.87	7.18	53.25	75.64	6.85	6.33	18.22	19.28	18.92	3.89	8.11
	c105662f1p05067	-6.57	7.76e-06	0.002	3.59	7.79	11.12	6.07	2.36	6.79	9.55	1.89	0.47	0.88	1.63	1.49	0.46	0.37
	c10566f2p51656	-4.23	1.74e-05	0.00731	6.58	24.63	24.69	21.36	3.68	16.37	27.11	2.65	3.71	3.61	9.98	4.99	1.49	2.96
	c10568f1p01372	-4.68	8.09e-06	0.00403	3.69	10.63	10.51	9.39	1.29	9.75	9.23	1.84	1.18	1.54	3.3	2.2	0.73	0.85
	c105691f1p04708	-10.79	3.15e-06	0.00982	0.55	1.59	2.95	4.24	0.37	3.54	4.36	0.09	0.16	0.06	0.66	0.31	0.14	0.19
	c1056f7p0825	-5.48	1.12e-05	0.01	2.55	12.64	10.89	15.26	1.26	16.44	14.1	0.99	0.86	1.84	6.72	2.12	0.27	0.56
	c105725f1p24393	-5.69	4.74e-06	0.00453	2.61	4.86	3.95	6.31	1.15	5.5	6.2	0.4	0.42	0.68	1.55	1.63	0.35	0.33
	c10572f2p0957	-6.4	6.27e-06	0.01	1.94	9.02	9.37	3.19	1.63	9.84	3.78	1.24	0.3	1.42	0.52	2.25	0.23	0.09
	c105745f1p04561	-6.71	4.25e-06	0.00518	1.12	4.53	5.81	3.63	1.48	4.44	5.47	0.51	0.3	0.42	1.22	0.7	0.59	0.21
	c105758f1p05026	-5.69	5.03e-06	0.00489	2.2	4.78	8.38	5.15	1.1	5.18	4.87	0.59	0.39	0.81	1.52	1.29	0.51	0.46
	c105769f1p25159	-4.16	4.02e-05	0.00491	17.46	50.38	62.46	42.46	9.73	55.8	50.3	10.99	6.28	6.49	25.05	13	3.41	4.18
	c105772f1p14664	-6.54	3.3e-06	0.01	1.41	4.37	2.99	4.41	0.48	3.39	3.63	0.57	0.36	0.41	0.9	0.52	0.26	0.14
	c105775f1p24863	-10.02	1.74e-05	0.00228	4.58	18.72	19.87	13.13	4.52	14.11	25.14	1.07	0.8	1.1	3.5	1.6	1.03	0.88
	c105778f1p04639	-6.89	3.42e-06	0.0096	2.89	2.54	1.63	3.06	0.69	5.25	4.89	0.44	0.26	0.05	1	0.55	0.21	0.55
	c105784f1p04552	-5.56	1.07e-05	0.00221	5.08	13.71	12.19	10.66	2.26	10.99	13.69	1.66	0.98	1.69	3.29	3.11	0.55	1.06
	c10579f1p11638	-4.82	9.95e-06	0.01	3.39	17.54	12.14	7.86	2.47	14.72	8.53	1.77	1.01	3.18	3.27	3.25	0.34	1.02
	c105802f1p05014	-6.61	5.61e-06	0.00478	1.72	7.69	7.41	5.8	1.09	4.03	6.49	0.56	0.54	0.7	1.62	1.07	0.16	0.52
	c10581f1p1542	-5.86	1.83e-05	0.00358	6.16	21.65	21.14	16.29	2.98	25.22	23.42	2.74	2.22	4.32	4.87	2.84	1.24	1.7
	c105835f1p06933	-7.71	6.58e-06	0.00475	2.51	9.38	7.5	8.49	0.94	3.81	6.43	0.44	0.32	0.46	2.18	1.09	0.23	0.36
	c10583f13p0614	-3.83	2.96e-05	0.00641	25.59	47.97	30.83	49.52	11.78	35.24	14.91	9.69	3.18	7.76	16	14.71	4.01	1.02
	c105844f1p01787	-5.59	4.88e-06	0.01	1.3	5.95	8.73	4.56	1.09	3.95	5.57	0.87	0.41	0.97	0.77	1.86	0.33	0.37
	c10584f1p21153	-4.74	6.2e-06	0.00673	2.9	7.5	5.62	10.47	1.4	7.83	5.68	0.97	0.97	1.31	3.3	1.38	0.19	0.62
	c105877f1p25103	-5.48	7.7e-06	0.00392	2.79	8.59	10.45	8.09	1.61	7.02	10.92	0.71	0.6	1.64	2.7	1.56	0.44	1.36
	c10587f2p01150	-9.95	3.52e-06	0.01	1.08	4.05	0.87	4.14	0.59	5.2	3.95	0.06	0.25	0.2	0.65	0.58	0	0.25
	c105887f1p04997	-8.71	3.16e-06	0.01	0.77	3.42	3.19	3.4	0.69	3.3	3.99	0.27	0.12	0.23	0.88	0.27	0.11	0.28
	c10591f2p01055	-8.94	6.27e-06	0.00226	2.11	5.25	8.03	5.64	1.48	5.54	8.03	0.71	0.39	0.5	1.02	0.73	0.53	0.16
	c105920f1p04770	-4.51	5.93e-06	0.00367	3.41	6.98	8.23	7.64	1.18	6.11	6.32	1.02	0.84	1.43	2.67	1.92	0.17	0.79
	c105939f1p04118	-4.76	4.43e-06	0.01	2.03	8.13	4.6	5.14	0.64	4.44	4.44	0.74	0.42	0.98	1.77	1.46	0.49	0.32
	c10593f1p1547	-5.05	2.57e-05	0.00801	16.31	20.28	23.72	23.02	3.53	44.48	40.57	6.94	2.36	3.88	10.13	7.05	1.43	2.22
	c105969f1p14534	-3.99	4.01e-06	0.01	2.67	5.87	5.82	4.51	0.99	4.56	4.88	1.17	0.64	1.22	2.12	1.2	0.53	0.47
	c105972f1p44974	-4.46	5.74e-05	0.00376	24.73	61.67	93.5	64.2	13.63	70.36	74.92	12.09	4.79	21.36	22.91	21.47	2.35	5.39
	c105981f1p04554	-5.97	3.6e-06	0.01	1.48	4.53	4.66	2.33	0.77	4.82	4.47	0.34	0.34	0.54	0.7	1.22	0.44	0.28
	c105984f1p04437	-19.83	5.59e-06	0.00437	1.36	4.26	7.02	4.22	0.87	3.62	8.61	0.25	0.14	0.1	0.46	0.29	0.08	0.2
	c105990f1p04947	-6.76	5.62e-06	0.00403	1.49	8.2	5.41	5.68	1.25	6.33	5.62	0.45	0.75	0.47	1.45	1.47	0.11	0.33
	c105997f1p35010	-6.15	1.11e-05	0.00329	4.35	14.99	11.73	14.17	1.46	11.1	12.3	1.04	0.93	1.86	4.19	2.13	0.4	0.85
	c105999f1p04748	-4.44	4.88e-06	0.00624	4.19	7.12	5.16	5.85	0.84	7.24	3.58	1.71	0.61	1.31	1.78	1.18	0.5	0.55
	c106011f1p14703	-5.4	7.68e-06	0.00587	2.65	11.66	6.87	9.41	1.36	9.69	7.87	1.06	0.84	0.77	2.82	1.96	0.5	1.22
	c106020f1p15019	-5.47	3.52e-06	0.01	1.75	2.65	5.37	2.2	0.58	4.74	5.05	0.49	0.19	0.69	1.04	0.85	0.2	0.63
	c106026f1p05075	-4.24	1.06e-05	0.00131	8.75	16.18	12.07	11.58	4.13	8.6	11.88	2.45	1.63	2.5	4.6	3.8	0.79	1.5
	c106103f1p04375	-9.34	3.53e-06	0.00648	1.58	4.59	3.63	3.09	0.71	3.63	3.38	0.39	0.18	0.24	0.64	0.53	0.05	0.18
	c106128f1p14295	-4.74	9.57e-06	0.00554	4.15	13.48	8.71	11.84	1.41	13.21	11.61	1.61	1.58	3	4.35	1.64	0.29	1.11
	c106132f1p04839	-8.04	2.87e-06	0.01	1.87	2.3	2.89	3.07	0.64	3.97	2.44	0.49	0.05	0.16	0.58	0.52	0.21	0.12
	c106143f1p04815	-4.95	3.98e-06	0.01	1.08	5.65	4.13	3.73	0.56	6.11	4.83	0.51	0.44	0.56	1.82	0.94	0.58	0.43
	c106153f1p24480	-4.12	7.04e-05	0.00453	29.88	100.26	106.32	93.95	17.17	85.34	75.31	13.68	12.69	17.94	30.32	36.72	5.8	6.07
	c106163f1p14470	-4.98	8.93e-06	0.00511	4.23	9.69	12.23	13.65	1.31	10.84	7.39	1.73	0.69	2.65	2.75	2.21	1	0.89
	c106169f1p14663	-8.41	1.01e-05	0.00485	2.6	8.41	13.9	3.9	4.01	10.51	15.84	1.39	0.47	0.62	1.06	2.29	0.65	0.56
	c106208f1p05221	-9.56	1.62e-05	0.00219	5.15	19.03	15.83	11.45	5.04	12.71	24.36	1.69	0.72	0.79	3.32	1.78	0.71	0.77
	c106215f1p14350	4.03	-0.00195	0.00152	882.1	5.82	27.54	3.8	1519.12	132.19	59.93	1526.79	1696.85	1434.96	1270.28	1288.38	1696.32	1695.59
	c106225f1p04846	-5.59	3.54e-06	0.01	1.52	4.25	3.12	5.24	0.8	1.86	5.47	0.11	0.28	0.9	1.34	1.02	0.02	0.32
	c106237f1p25211	-7.22	1.57e-05	0.001	6.83	15.71	18.71	14.91	3.53	15.93	19.29	1.8	1.03	1.32	3.69	3.97	0.62	0.71
	c106243f1p05278	-5.97	6.61e-06	0.01	2.11	10.53	4.06	5.53	1.73	9.98	7.43	0.54	0.77	1.07	1.22	1.73	0.68	0.93
	c106249f1p04993	-11.99	3.5e-06	0.00528	1.99	4.1	3.71	1.54	1.5	2.16	4.55	0.48	0.08	0.06	0.55	0.14	0.25	0.07
	c106256f1p14139	-5.96	5.76e-06	0.00413	1.8	6.88	6.53	7.87	1.04	6.15	5.6	0.45	0.43	0.92	2	1.42	0.33	0.47
	c106281f1p04547	-9.88	2.99e-06	0.01	0.94	2.63	4.84	1.17	0.22	3.81	3.33	0.18	0.21	0.08	0.55	0.23	0.12	0.34
	c106296f3p5829	-5.11	0.000109	0.01	21.68	115.33	207.65	136.67	21.12	117.88	117.68	10.87	9.33	23.2	48.29	33.23	7.03	12.43
	c10629f1p0532	-9.82	5.65e-06	0.01	0.7	3.75	8.44	8.95	1.37	2.75	6.66	0.14	0.08	0.43	1.55	0.68	0.21	0.24
	c106306f1p52120	-8.61	9.13e-06	0.00633	0.99	10.25	13.89	7.3	1.35	10.41	9.78	0.46	0.63	0.96	1.76	1.6	0.21	0.65
	c106308f1p04384	-5.12	6.62e-06	0.00358	3.7	8.83	7.9	6.74	1.63	9.44	4.66	0.77	0.87	1.03	2.45	1.99	0.79	0.48
	c106332f1p04394	-12.77	7.49e-06	0.00247	1.98	7.29	7.19	4.4	2.16	7.15	11.26	0.47	0.33	0.22	1.1	0.53	0.3	0.29
	c106339f1p04694	-11.77	6.39e-06	0.00486	2.16	5.52	11.36	5.47	1.24	4.05	6.13	0.52	0.14	0.76	0.74	0.65	0.02	0.22
	c106341f1p41935	-4.71	4.15e-06	0.00943	2.74	4.91	4.62	4.29	0.86	6.02	4.99	0.77	0.6	0.82	1.53	1.43	0.4	0.5
	c10635f2p0499	-5.49	3.37e-05	0.01	9.42	20.85	65.86	37.77	8.96	32.17	47.93	5.36	2.49	5.6	10.42	12.95	2.24	1.51
	c106375f1p04771	-6.79	5.84e-06	0.00275	2.49	6.83	7.52	5.66	0.84	5.49	6.39	0.76	0.36	0.89	1.52	0.83	0.4	0.43
	c106381f1p24360	-6.56	4.81e-06	0.00885	1.17	6.36	4.47	3.9	0.6	6.77	6.17	0.36	0.5	0.75	1.46	0.63	0.28	0.52
	c106385f1p04653	-4.97	5.79e-06	0.0066	1.57	6.6	8.74	6.75	1.24	6.42	6.8	1.49	0.55	1.18	1.99	1.53	0.31	0.61
	c106404f1p14574	-9.59	9.48e-06	0.00742	8.65	6.97	4.35	6.68	0.47	10.85	16.55	0.83	0.13	0.51	1.34	1.68	0.59	0.61
	c10640f2p0904	-7.21	1.3e-05	0.00236	9.6	12.51	16.01	9.97	1.5	19.27	9.89	2.14	0.37	3.6	1.92	2.05	0.74	0.09
	c106418f1p02248	-5.19	9.51e-06	0.00288	3.47	11.44	11.98	10.89	2.16	10.58	11.65	1.79	1.15	1.62	3.02	2.35	0.65	1.42
	c106419f1p14407	-6.49	4.28e-06	0.00938	1.4	5.36	2.3	5.05	0.61	5.38	6.03	0.38	0.42	0.7	1.12	0.64	0.18	0.59
	c106447f1p02305	-4.71	4.33e-06	0.01	1.67	3.85	5.62	4.65	0.81	7.32	4.91	0.81	0.58	0.89	1.94	1.16	0.39	0.36
	c106455f1p04394	-13.2	3.78e-06	0.00421	0.65	4.55	3.3	3.76	0.49	4	4.58	0.19	0.11	0.22	0.64	0.23	0.03	0.19
	c10645f3p21358	-4.18	5.89e-06	0.00666	4.47	7.02	8.81	4.76	1.23	5.38	9.53	1.48	0.83	1.23	2.25	1.44	0.82	1.82
	c106466f1p14208	-8.09	2.91e-06	0.01	0.82	4	4.37	2.06	0.73	3.78	1.64	0.11	0.19	0.27	0.88	0.6	0.08	0.03
	c106473f1p14905	-6.44	3.09e-06	0.01	0.88	4.88	2.85	3.64	0.52	2.93	3.72	0.15	0.27	0.35	0.84	0.74	0.34	0.31
	c10648f1p01097	-6.02	1.53e-05	0.0056	8.13	14.55	20.45	23.4	1.19	10.66	19.23	2.31	0.45	0.83	7.31	3.14	0.92	1.26
	c106514f1p03941	-4.56	2.31e-05	0.00279	10.85	35.13	29.08	25.1	5.97	29.09	23.97	4.8	3.28	5.7	8.48	7.51	2.7	2.42
	c106518f1p04652	-7.38	3.07e-06	0.01	1.18	4.27	2.32	3.02	0.42	4.02	3.47	0.28	0.24	0.42	0.68	0.62	0.12	0.18
	c106520f1p43906	-4.55	1.11e-05	0.00361	3.89	14.06	13.9	13.34	2.76	14.13	13.82	1.98	1.42	2.86	3.93	3.93	0.97	1.58
	c106527f1p01115	-4.88	4.49e-06	0.00888	2.22	7.94	3.57	5.17	1.4	5.47	3.79	0.4	0.33	0.34	3.11	0.6	0.6	0.67
	c10652f1p01118	-4.57	8.08e-06	0.01	4.21	6.15	14.28	12.63	1.21	9.87	7.24	1.27	0.71	2.3	3.26	3.08	0.5	1.05
	c106534f1p04375	-17.94	3.44e-06	0.00617	0.6	3.36	5.61	1.72	1.05	2.2	3.85	0.29	0.04	0.05	0.38	0.09	0.1	0.07
	c106563f1p44491	-4.83	8.27e-06	0.00376	2.76	10.57	8.56	7.46	3.03	9.8	12.73	1.04	1.1	1.42	2.49	3.39	0.65	1.28
	c10656f2p01705	-6.96	5.56e-06	0.01	0.87	8.57	6.13	5.67	0.49	5.45	6.63	0.48	0.29	0.75	1.69	1.05	0.2	0.39
	c106570f1p04774	-7.07	4.44e-06	0.01	0.72	7.65	3.5	5.06	0.74	4.31	4.77	0.23	0.66	0.33	1.08	0.84	0.32	0.33
	c10657f1p0810	-5.83	4.74e-06	0.00574	2.6	4.11	5.55	8.41	1.35	3.62	3.91	0.46	0	0.94	2.04	0.95	0	0.67
	c106595f1p14835	-10.28	1.46e-05	0.00335	3.14	12.85	20.06	16.17	1.32	14.47	16.52	0.78	0.54	1.19	2.37	1.98	0.48	0.88
	c106610f1p14273	-4.73	7.3e-06	0.00806	3.64	12.32	10.83	5	1.79	7.82	7.63	1.7	1.24	1.93	1.66	2.45	0.71	0.67
	c10661f1p1999	-6.28	2.8e-05	0.00103	21.19	33.72	27.44	35.56	3.75	27.92	25.58	5.29	1.83	3.41	7.86	6.63	0.67	2.22
	c106622f1p04307	-6.86	3.89e-06	0.01	1.17	5.98	2.64	4.39	0.53	2.73	6.04	0.43	0.35	0.58	0.95	0.72	0.08	0.31
	c106658f1p04852	-5.65	1.13e-05	0.00488	3.55	16.08	9.46	11.56	2.22	13.53	15.67	1.49	1.1	1.37	4.19	2.52	0.76	1.31
	c106685f1p04745	-4.77	8.25e-06	0.00395	3.84	10.94	9.15	9.72	1.31	9.25	11.05	1.66	1.13	1.23	3.05	2.5	0.59	1.41
	c106693f1p24611	-4.45	1.38e-05	0.00409	7.66	15.59	16.78	21.44	1.8	17.22	15.88	2.97	1.9	3.14	7.09	3.12	1.38	2.04
	c106704f1p04605	-5.9	1.12e-05	0.00437	2.87	16.48	12.11	13.08	2.25	10.83	13.51	1.23	1.35	1.16	3.78	2.69	0.66	1.18
	c106706f1p04645	-5.13	6.54e-06	0.01	2.27	9.28	7.67	5.37	1.41	11.03	5.75	0.76	0.93	1.44	1.73	1.94	0.76	0.77
	c106748f1p04729	-5.08	3.88e-06	0.01	1.94	4.39	4.78	5.14	0.49	4.63	4.77	0.7	0.31	0.73	1.78	0.81	0.19	0.63
	c106756f1p23577	-7.52	3.97e-06	0.01	0.55	5.81	2.5	4.03	0.68	4.41	5.52	0.33	0.28	0.72	0.71	0.76	0.03	0.29
	c106758f1p04586	-5.81	9.98e-05	0.00675	36.16	166.19	98.51	146.36	29.05	87.41	73.5	11.8	4.66	14.19	50.47	17.46	5.42	5.71
	c106759f1p14599	-8.06	4.43e-06	0.00806	1.31	5.86	2.59	7.14	0.92	3.65	4.47	0.29	0.12	0.3	1.06	0.9	0.15	0.42
	c106780f1p24343	-5.23	9.02e-06	0.0029	5	9.56	13.33	9.05	1.34	11.06	9.48	2.13	0.83	1.62	2.04	2.39	0.93	1.3
	c106782f1p24466	-9.76	2.38e-05	0.00191	7.27	26.95	23.11	14.88	6.48	26.03	32.62	1.88	1.3	1.29	4.28	2.68	1.33	1.32
	c106786f1p14948	-4.78	1.09e-05	0.01	3.76	19.41	11.78	14.95	1.74	10.47	11.37	2.51	1.58	2.5	3.28	3.3	0.84	1.35
	c10680f1p0608	-7.27	9.03e-06	0.01	2.65	8.39	17.23	6.72	1.11	11.81	7.48	2.08	0.55	1.12	1.9	0.93	0.55	0.48
	c10681f1p01922	-7.19	4.23e-06	0.00859	1.66	4.7	6.7	2.72	0.35	5.35	3.86	0.46	0.21	0.74	0.81	0.56	0.52	0.22
	c10682f1p0855	-10	6.69e-06	0.00426	2.04	6.26	4.69	7.4	0.55	7.81	9.51	0.52	0.29	0.53	1.07	0.66	0.39	0.34
	c106833f1p04416	-6.62	2.47e-05	0.00329	7.12	28.3	19.98	26.21	5.16	30.34	36.17	2.49	2.76	2.64	6.49	4.05	2.03	2.7
	c10683f1p0664	-11.23	4.27e-06	0.01	0.19	4.34	4.51	6.92	0.08	4.4	3.71	0	0.19	0.34	1	0.08	0.17	0.38
	c106844f1p04546	-12.26	2.85e-06	0.01	0.76	1.79	3.04	1.67	0.58	4.49	3.91	0.19	0.09	0.16	0.27	0.23	0.12	0.25
	c10684f2p11914	-5.15	3.42e-06	0.01	0.91	3.59	2.6	6.04	1.33	4.72	3.46	0.23	0.48	0.67	0.73	1.9	0.12	0.26
	c106877f1p04502	-5.39	5.57e-06	0.00738	1.57	5.89	7.63	8.05	1	6.83	4.85	0.25	0.59	0.8	2.77	1.47	0.29	0.47
	c106882f1p04460	-3.84	4.57e-05	0.00583	30.77	74.24	44.99	67.29	9.7	53.24	56.75	12.33	9.05	8.39	23.31	27.03	1.83	5.87
	c106890f1p44904	-4.98	8.91e-06	0.01	4.32	14.94	9.72	13.05	1.97	10.68	4.22	1.31	1.14	1.87	3.76	2.66	0.55	0.54
	c106893f1p04279	-6.02	6.13e-06	0.0036	2.82	8.28	5.39	5.43	1.13	8.4	6.62	0.89	0.57	1.01	1.65	1.28	0.34	0.58
	c106901f1p04513	-5.72	9.07e-06	0.00233	4.04	11.9	9.62	9.46	1.83	10.2	10.32	1.53	0.64	1.14	3.08	2.18	0.27	1.18
	c106905f1p11470	-5.78	5.57e-06	0.00502	2.02	7.55	6.79	6.83	0.67	5.34	5.82	0.96	0.31	0.62	1.97	1.33	0.38	0.48
	c106931f1p44949	-6.97	6.07e-06	0.00279	3.23	8.74	5.04	4.74	1.07	7.14	6.46	0.65	0.62	0.41	1.62	1.02	0.5	0.41
	c106946f1p05054	-13.25	2.94e-06	0.00879	1.12	3.94	2.66	1.85	0.88	1.73	4.24	0.46	0.09	0.12	0.21	0.11	0.04	0.21
	c106959f1p04919	-6.1	7e-06	0.00542	2.55	9.17	6.5	4.99	2.32	6.04	11.96	1.09	0.66	0.51	1.77	2.16	0.36	0.58
	c106983f1p05042	-6.09	5.9e-06	0.00349	1.94	7.93	6.54	6.25	1.16	6.31	6.4	0.64	0.47	0.9	2.04	1.03	0.2	0.72
	c106986f1p04329	-6.02	3.48e-06	0.01	1.8	3.81	2.75	4.42	0.62	4.95	3.84	0.64	0.46	0.27	1	0.45	0.44	0.42
	c107002f1p04655	-5.96	3.56e-06	0.01	2.99	4.44	3.11	4.91	0.49	2.86	3.88	0.34	0.31	0.68	1.48	0.53	0.12	0.34
	c10700f1p02031	-4.77	4.53e-06	0.00931	3.35	5.23	2.7	3.09	1.95	4.9	8.71	1.76	0.27	0.41	1.34	1.49	0.44	0.58
	c107021f1p05300	-5.1	3.74e-06	0.01	1.88	5.47	5.09	4.49	0.61	3.81	3.65	0.32	0.4	0.9	1.5	1.37	0.19	0.23
	c107022f1p04513	-6.41	4.66e-06	0.00718	1.35	6.07	5.88	3.6	0.49	5.44	5.78	0.27	0.43	0.78	1.38	0.74	0.3	0.58
	c107033f1p14996	-5.57	5.55e-06	0.01	1.4	7.83	4.93	5.32	0.96	9.55	5.46	0.59	0.75	1.12	1.43	1.65	0.36	0.46
	c107065f1p23821	-5.24	1.9e-05	0.01	5.18	31.18	15.77	26.98	4.34	14.45	27.68	3.01	1.63	2.41	7.39	6.11	1.26	2.14
	c10706f1p0777	-11.77	3.31e-06	0.00695	0.48	4.01	3.86	3.73	0.54	2.23	4.18	0.38	0.16	0.2	0.21	0.27	0.29	0.11
	c107076f1p04698	-5.68	3.63e-06	0.01	0.76	6.37	4.14	3.55	0.79	3.2	4	0.44	0.39	0.66	0.93	1.06	0.17	0.37
	c107122f1p02443	-5.56	3.05e-05	0.00272	14.29	43.01	31.63	31.73	5.2	41.71	30.64	3.53	3.66	4.77	8.8	8.28	2.75	3.84
	c107142f1p04522	-5.26	7.19e-06	0.00387	3.81	9.88	6.45	8.75	1.25	6.34	9.99	1.19	1.06	1.2	2.84	1.32	0.42	0.8
	c107154f1p05000	-5.69	3.54e-06	0.01	1.12	5.7	3	3.76	0.76	4.06	4.48	0.52	0.4	0.65	0.91	0.83	0.25	0.46
	c107204f1p04628	-3.95	7.66e-06	0.00948	3.56	9.39	11.32	11.1	1.1	8.47	10.7	2.22	0.94	1.82	5.02	2.71	0.56	0.83
	c107207f1p34113	-5.84	7.83e-06	0.00478	1.89	9.48	10.05	9.17	1.2	8.97	8.92	0.76	0.65	1.91	1.81	1.58	0.84	0.96
	c107215f1p05166	-4.55	1.17e-05	0.00288	7.34	12.96	13.98	13.93	2.86	18.68	10.11	2.84	1.15	2.39	5.01	4.07	0.82	1.24
	c10722f6p0657	-4.37	0.000105	0.0029	50.74	141.47	148.1	140.09	22.69	127.69	112.84	25.95	16.01	25.36	44.57	39.04	7.5	11.73
	c107231f1p24489	-6.48	5.21e-06	0.00427	1.57	7.26	6.22	4.43	0.98	5.71	5.58	0.5	0.32	0.93	1.31	1.21	0.27	0.35
	c107255f1p14458	-6.34	5.59e-06	0.00402	2.25	6.47	6.6	4.31	0.96	8.02	5.72	0.65	0.42	1.24	1.17	1.26	0.3	0.38
	c107256f1p14332	-4.78	1.98e-05	0.00715	7.88	26.87	22.56	20.6	3.94	34.08	18.39	3.62	2.55	3.82	8.36	6.96	1.2	1.6
	c107269f1p04933	-7.43	5.68e-06	0.00458	1.81	5.55	7.7	5.28	0.5	7.43	5.7	0.71	0.31	0.85	1.22	0.71	0.42	0.34
	c107286f1p04339	-10.4	2.69e-06	0.01	1.17	2.45	1.84	4.58	0.35	1.74	3.47	0.07	0.11	0.19	0.59	0.28	0.15	0.11
	c107291f1p04993	-6.43	8.66e-06	0.0051	2.32	13.45	10.71	7.24	1.88	9.83	8.16	0.87	0.73	0.99	2.45	1.94	0.65	0.71
	c107318f1p14321	-5.48	5.31e-06	0.01	1.11	8.33	4	5.96	0.98	6.91	6.72	0.65	0.57	0.75	2.1	1.32	0.23	0.59
	c107328f1p04172	-5.18	1.26e-05	0.0064	3.96	13.48	18.84	19.07	2.09	13	13.51	1.23	0.81	2.18	6.15	3.5	1	1.36
	c10732f1p0986	-5.58	9.42e-06	0.00572	4.52	15.75	7.08	11.73	1.64	9.3	10.16	0.98	1.14	1.15	3.69	2.35	0.34	1.15
	c10733f6p11068	-7.61	5.41e-06	0.00626	2.21	7.49	4.21	2.87	0.98	6.98	7.37	0.91	0.9	1.07	0.16	0.72	0.32	0.16
	c107347f1p05302	-7.41	3.04e-06	0.01	0.93	3.97	4.61	2.95	0.5	3.06	2.69	0.34	0.25	0.4	0.69	0.46	0.17	0.23
	c107356f1p04366	-4.89	5.74e-06	0.00549	2.02	7.32	7.21	6.71	1.22	5.43	7.97	0.87	0.56	1.04	2.2	1.7	0.33	1.05
	c10738f2p01522	-8.36	3.48e-06	0.00781	1.55	3.06	4.59	3.24	0.65	2.88	4.96	0.24	0.11	0.7	0.54	0.51	0.07	0.33
	c107397f1p04805	-5.73	5.14e-06	0.00745	1.96	6.89	6.87	4.33	0.61	7.18	4.6	0.73	0.7	0.96	1.5	1.02	0.28	0.46
	c107411f1p02295	-5.57	1.28e-05	0.00219	6.75	12.86	17.39	11.19	3.04	12.34	18.37	2.08	0.91	2.34	4.76	2.4	0.83	1.41
	c107423f1p04868	-5.56	4.09e-06	0.0078	2.01	3.96	4.71	5.55	0.44	5.37	4.85	0.67	0.26	0.89	1.63	0.68	0.23	0.48
	c107430f1p05053	-5.39	1.12e-05	0.01	5.38	6.46	14.23	10.65	1.31	15.91	19.6	1.33	0.63	2.69	4.15	2.49	0.93	1.44
	c107433f1p45057	-7.73	2.2e-05	0.00318	5.51	30.12	23.67	26.09	3.36	22.6	21.67	1.93	1.08	2.65	5.95	3.66	0.46	1.47
	c107451f1p14632	-5.29	4.12e-06	0.00798	2.11	4.39	3.01	5.46	0.85	5.12	6.25	0.45	0.37	0.72	1.73	0.96	0.29	0.63
	c107460f1p04958	-5.38	5.11e-06	0.00793	2.55	8.17	3.95	4.81	0.73	6.97	5.63	0.62	0.4	1.02	1.36	0.95	0.98	0.76
	c107465f1p04665	-5.44	4.4e-06	0.01	1.01	6.18	5.14	5.87	0.41	4.99	4.56	0.64	0.62	1.43	1.26	0.62	0.19	0.41
	c107489f1p04764	-5.47	6.56e-06	0.00642	2.67	8.72	3.97	7.05	1.41	9.1	9.08	1.03	0.88	0.87	1.89	1.71	0.35	0.95
	c107511f1p14186	-5.44	4.03e-06	0.0083	1.62	5.65	4.69	4.61	0.62	5.46	3.82	0.63	0.51	0.52	1.56	1.01	0.31	0.33
	c107540f1p14391	-5.32	6.57e-06	0.00722	1.86	7.48	6.59	10.07	1.02	7.42	8.21	0.86	0.9	1.03	2.45	1.33	0.74	0.7
	c107542f1p04623	-9.45	5.78e-06	0.01	0.54	9.44	7.33	4.52	0.99	4.28	6.32	0.14	0.31	0.7	1.02	0.77	0.29	0.3
	c10755f1p01436	-8.4	4.02e-06	0.01	1.21	4.17	5.9	2.13	0.22	5.73	4.18	0.21	0.49	0.47	0.52	0.32	0.47	0.32
	c107585f1p04802	-5.62	7.09e-06	0.01	1.85	8.03	8.26	9.47	0.29	10.89	6.92	1.39	0.83	1.08	3.08	0.62	0.67	0.47
	c107596f1p04736	-5.45	7.99e-06	0.01	2.3	14.46	8.13	5.22	1.7	10.58	9.13	0.87	1.19	1.27	2.54	2.09	0.7	0.79
	c107599f1p04681	-5.81	7.39e-06	0.00735	2.04	11.71	7.25	9.27	1.12	7.67	7.77	0.86	0.83	1.02	2.81	1.39	0.48	0.66
	c107606f1p04418	-5.26	4.62e-06	0.01	1.93	5.93	5.33	7.79	0.45	5.22	3.22	0.64	0.69	0.7	2	0.93	0.36	0.35
	c10762f1p01380	-6.99	1.61e-05	0.00381	5.21	22.34	15.19	21.57	2.08	15.99	16.36	1.13	1.45	1.26	3.6	4.88	0.81	1
	c107631f1p35069	-6.17	4.34e-06	0.00778	0.32	6.3	6.3	4.39	2.76	4.19	2.33	0.06	0.31	0.84	1.22	1.75	0.07	0.06
	c107685f1p04690	-5.92	6.93e-06	0.00715	2.53	10.55	5.52	6	1.14	9.71	8.13	0.71	0.97	1.01	2.26	1.17	0.35	0.89
	c107689f1p04838	-4.38	4.22e-06	0.01	1.8	5.84	5.28	4.37	1.19	6.45	4.71	0.56	0.99	1.08	1.82	1.63	0.33	0.36
	c10769f3p51613	-6.11	4.14e-05	0.00404	15.98	51.71	34.03	61.81	5.69	47.06	46.96	3.46	3.53	5.31	16.36	8.38	2.85	3.22
	c107730f1p04469	-5.29	5.84e-06	0.00581	2.1	6.33	6.56	7.88	0.79	8	6.11	0.95	0.82	0.93	1.86	1.31	0.75	0.53
	c107737f1p15005	-6.99	9.9e-06	0.01	1.41	14.82	11.94	13.23	1.34	6.57	11.51	0.49	0.93	1.4	3.27	1.57	0.22	0.82
	c107740f1p04339	-9.32	1.63e-05	0.00634	4.16	25.82	23.3	13.7	2.83	10.55	14.89	1.32	0.87	1.34	3.65	1.48	0.54	1.02
	c107743f1p04097	-5.1	1.95e-05	0.00433	9.05	30.07	18.28	21.35	3.09	27.3	20.12	3.51	2.66	3.03	7.09	5.22	1.89	1.96
	c10778f5p2917	-10.42	9.46e-06	0.00389	0.14	9.92	12.52	7.05	3.47	12.61	8.24	0	0.36	0.5	1.8	1.4	0.61	0.5
	c107807f1p14846	-5.67	3.77e-06	0.00963	1.61	4.49	3.81	4.74	0.53	5.07	4.26	0.34	0.4	0.64	1.54	0.8	0.3	0.31
	c107829f1p04664	-4.03	4.83e-06	0.01	3.08	4.47	5.67	9.49	1.43	4.56	5.32	1.58	0.29	1.48	2.25	2.13	0.1	0.61
	c107833f1p04593	-6.84	4.81e-06	0.01	2.08	5.89	6.73	3.29	0.57	2.78	8.01	0.66	0.15	0.97	1.21	0.45	0.07	0.77
	c107852f1p04859	-9.14	3.28e-06	0.01	0.49	4.34	3.91	2.35	0.38	2.6	4.7	0.09	0.18	0.33	0.78	0.37	0.02	0.28
	c107864f1p04707	-11.87	3.21e-05	0.00161	13.17	36	33	18.69	10.35	21.38	48.1	2.61	0.92	1.57	4.95	2.37	1.25	1.56
	c107883f1p14556	-4.8	5.68e-06	0.00704	3.16	3	8.38	7.72	1.56	5.57	8.37	0.99	0.42	1.52	1.39	2.74	0.05	0.77
	c107884f1p24633	-8.3	8.09e-06	0.01	2.55	12.32	13.58	4.7	0.96	8.07	5.85	0.37	0.42	1.67	1.44	0.89	0.36	0.64
	c107888f2p14744	-5.55	6.06e-06	0.0059	1.33	7.48	10.09	5.48	2.28	5.1	6.84	0.53	0.56	0.94	2.11	1.96	0.21	0.64
	c10788f4p0786	-4.74	6.34e-06	0.01	1.26	7.06	8.89	10.17	1.13	7.27	7.06	0.85	0.74	1.73	2.42	2.09	0.29	0.91
	c107894f1p04617	-4.44	4.11e-06	0.01	3.42	5.29	4.1	3.27	0.93	5.78	5.69	0.79	0.42	1.6	1.33	1.47	0.26	0.55
	c107896f1p14693	-6.57	5.69e-06	0.00866	1.84	9.66	6.78	4.23	1	4.94	6.42	0.71	0.59	1.05	1.48	0.84	0.17	0.47
	c107898f1p04797	-8.44	1.22e-05	0.00373	3.77	17.65	12.68	9.07	3.31	7.95	17.21	0.84	1	0.85	3.36	1.53	0.37	0.53
	c107899f1p04623	-6.61	9.35e-06	0.00539	2.29	10.41	7.73	12.49	1.21	11.56	12.13	0.93	0.83	1.08	2.81	1.5	0.77	0.82
	c1078f9p2744	-34.59	2.61e-05	0.00297	10.83	12.52	24.14	24.7	2.38	22.34	41.64	0.4	0.28	0.51	1.45	0.41	0	0.96
	c107900f1p04738	-4.79	7.87e-06	0.00397	3.94	9.54	12.78	7.84	1.68	8.61	8.16	1.3	0.88	2.58	2.46	2.55	0.44	0.77
	c107919f1p04878	-7.11	3.55e-06	0.00857	0.91	4.41	4.8	3.55	1.02	3.76	3.39	0.18	0.31	0.19	0.91	0.92	0.28	0.28
	c107935f1p34378	-6.12	9.9e-06	0.00684	3.73	16.75	10.47	8.73	2.26	13.1	6.82	0.85	1.32	1.61	2.7	2.38	0.79	0.47
	c107936f1p05202	-6.04	5.13e-06	0.0035	2.12	7.37	4.27	5.72	1.54	5.58	5.85	1.04	0.49	0.5	1.54	1	0.35	0.45
	c107937f1p05011	-6.22	6.4e-06	0.00377	2.37	8.67	6.67	7.29	0.83	6.58	7.15	0.53	0.5	1.15	1.96	1.34	0.36	0.52
	c107981f1p05030	-5.39	3.85e-06	0.00961	1.72	5.38	4.49	4.76	0.83	4.03	4.09	0.57	0.58	0.46	1.44	1.1	0.29	0.27
	c107986f1p04614	-6.16	5.43e-06	0.00322	2.36	6.53	6.48	4.46	0.89	5.99	6.69	0.68	0.46	0.69	1.72	1.11	0.19	0.57
	c107993f1p24448	-7.17	4.18e-06	0.01	0.97	6.62	2.8	5.69	0.42	4.12	4.39	0.42	0.31	0.24	1.43	0.75	0.15	0.2
	c10799f2p01050	-11.65	1.65e-05	0.00413	6.25	17.73	19.47	7.61	4.71	9.74	27.5	1.77	0.79	1.3	1.89	1.22	0.53	0.48
	c108006f1p05249	-6.66	9.1e-05	0.01	30.9	171.45	99.58	91.23	14.82	59.3	98.4	12.42	4.2	18.19	26.73	16.62	2.36	4.36
	c108008f1p04599	-6.85	4.53e-06	0.00413	1.8	5.25	3.68	4.98	1.13	6.14	4.88	0.29	0.42	0.36	1.44	1.25	0.15	0.16
	c108028f1p14294	-7.35	3.04e-06	0.01	1.44	3.6	3.13	2.21	0.67	3.92	3.58	0.28	0.22	0.35	0.65	0.51	0.16	0.35
	c108056f1p02498	-9.12	6.83e-06	0.00702	4.22	4.62	8.59	3.54	0.13	10.7	8.02	0.98	0.2	0.79	1.09	0.29	0.63	0.39
	c108057f1p14807	-4.46	8.71e-06	0.00372	5.11	12.35	7.52	9.9	1.81	11.27	11.55	1.81	1.37	2.14	3.44	2.55	0.68	1.34
	c108069f1p04458	3.26	-0.00108	0.00387	688.91	18.78	38.43	14.68	1049.72	84.61	46.91	959.99	919.5	921.13	890.52	695.03	946.11	1001.32
	c108090f1p85076	-6.83	3.79e-06	0.01	0.51	2.96	4.4	5.87	0.62	3.7	4.94	0.55	0.15	0.45	0.76	0.4	0.37	0.67
	c108106f1p04671	-9	1.25e-05	0.00175	3.68	15.71	11.47	10.51	3.76	11.04	16.28	1.08	0.6	0.77	2.72	1.53	0.59	0.77
	c108110f1p04526	-6.34	5.46e-06	0.00352	2.19	7	4.84	6.49	1.12	7.22	4.57	0.62	0.45	0.5	1.51	1.35	0.52	0.31
	c108118f1p04588	-7.28	4.29e-06	0.0046	1.89	4.82	4.45	4.33	0.66	5.46	4.67	0.36	0.26	0.56	1.02	0.89	0.19	0.32
	c108119f1p04313	-4.73	5e-06	0.00511	3.1	6.47	4.85	6.93	1.35	6.22	5.08	0.81	0.43	0.89	1.86	2.03	0.54	0.61
	c10813f1p01057	-7.18	3.48e-06	0.00936	0.94	3.36	4.73	3.55	0.54	3.78	4.75	0.28	0.35	0.22	0.94	0.39	0.32	0.52
	c108143f1p24628	-7.4	6.11e-06	0.00198	2.88	7.77	6.11	6.51	1.03	6.34	5.45	0.45	0.44	0.6	1.9	1.08	0.14	0.26
	c108163f1p04513	-6.05	2.95e-05	0.01	8.87	43.4	18.31	44.31	3.68	36.37	32.81	2.78	2.93	2.39	13.07	5.82	1.39	2.64
	c108184f1p14451	-5.73	1.16e-05	0.0064	2.89	11.63	17	16.47	2.3	15.52	9.1	1.18	0.53	2.41	4.1	3.26	0.65	0.93
	c10818f2p11349	-6.77	1.2e-05	0.00233	4.5	15.94	12.57	13.99	2.16	12.01	12.1	1.54	0.65	1.12	3.31	2.4	0.75	1.05
	c108192f1p04459	-8.01	2.12e-05	0.00581	6.56	21.5	22.74	10.25	5.62	22.19	37.77	2.17	0.96	1.63	4.74	3.29	1.1	1.91
	c108203f1p24583	-6.32	3.66e-06	0.01	0.81	5.17	2.94	4.6	0.59	3.3	4.97	0.24	0.43	0.26	1.32	0.71	0.22	0.37
	c108208f1p34924	-5.9	8.24e-06	0.01	3.42	13.46	6.79	10.57	0.38	10.12	7.46	0.97	1.07	1.14	3.11	1.42	0.66	0.49
	c108248f1p25041	-6.73	4.47e-06	0.00413	2.15	5.07	5.41	3.99	0.76	6.47	3.01	0.5	0.23	0.72	1.43	0.71	0.2	0.21
	c10824f1p0909	-7.52	5.29e-06	0.01	2.31	8.76	5.47	5.04	0.29	3.06	6.68	0.9	0.41	0.58	1.27	0.68	0	0.37
	c108267f1p04933	-7.82	4.38e-06	0.00409	1.33	5.61	3.94	4.54	0.75	5.38	4.9	0.36	0.38	0.25	0.92	0.75	0.29	0.43
	c108271f1p04665	-5.87	1.55e-05	0.00413	4.35	22.95	18.39	17.64	2.66	16.18	16.53	1.56	1.64	2.97	4.62	3.61	0.82	1.58
	c108276f1p02616	-5.37	7.78e-06	0.00332	3.92	11.41	7.98	9.66	1.41	7.29	8.4	0.77	0.89	0.84	2.8	2.06	0.9	1.09
	c108309f2p13939	-4.48	4.58e-05	0.0096	15.71	78.16	57.55	51.32	7.69	64.91	44.97	8.12	6.59	11.83	20.78	13.07	5.31	5.86
	c108311f1p24574	-7.49	2.65e-05	0.00562	9.2	44.13	29.09	14.34	7.17	34.58	21.14	3.89	2.54	4.25	3.81	2.88	1.66	2.29
	c108320f1p04192	-4.66	3.66e-06	0.01	1.86	4.55	6.55	3.49	0.94	3.52	4.41	0.46	0.6	0.9	1.52	1.1	0.45	0.39
	c10832f6p31196	-6.66	9.42e-06	0.00571	3.52	14.1	7.09	11.95	1.22	8.89	11.21	0.75	0.83	0.63	4.22	1.55	0.37	0.35
	c108342f1p04644	-4.07	7.65e-06	0.0052	4.29	11.54	6.65	12.39	2.8	8.09	8.3	1.95	0.88	1.29	4.44	3.61	0.31	0.78
	c108353f1p05106	-5.09	8.03e-06	0.00328	2.95	9.53	8.68	11.1	1.94	8.73	9.56	1.31	0.54	1.79	3.39	1.91	0.5	0.86
	c108378f1p04423	-7.94	9.7e-06	0.00427	4.26	6.47	13.42	6.92	1.15	12.5	13.29	1.14	0.45	1.37	1.72	1.14	0.48	1
	c108390f1p14570	-4.67	5.24e-06	0.01	2.43	6.29	9.47	6.42	1.14	5.65	3.8	0.7	0.58	1.85	2.13	1.74	0.32	0.23
	c108396f1p04342	-5.53	4.45e-06	0.0058	2.54	6.23	4.25	5.36	0.72	5.51	4.38	0.48	0.52	0.94	1.14	1.25	0.41	0.49
	c108416f1p04264	-5.06	4.07e-06	0.00893	2.03	4.31	3.97	5.82	1.06	4.02	5.99	0.96	0.41	0.67	1.72	1.23	0.13	0.26
	c108422f1p04715	-7.05	3.98e-06	0.00697	1.44	4.08	2.64	6.08	0.56	3.93	5.03	0.17	0.23	0.29	1.73	0.43	0.07	0.44
	c108431f1p04575	-5.62	5.11e-06	0.0095	2.11	5.17	4.35	5.34	0.66	8.86	5.99	1.07	0.55	0.53	1.44	1.05	0.63	0.5
	c108473f1p45077	-6.45	8e-06	0.01	1.9	13.62	6.09	7.94	1.37	8.03	10.45	0.54	0.77	0.83	2.75	1.71	0.53	0.52
	c108486f1p04953	-10.37	5.79e-06	0.00228	1.67	7.02	6.64	4.63	1.83	3.59	7.16	0.44	0.24	0.29	1.08	0.55	0.16	0.38
	c10848f8p0791	-6.23	9.2e-06	0.00816	4.7	8.69	5.68	15.06	0.86	9.08	13.64	1.22	1.42	1.34	2.72	1.17	0.71	0.69
	c108491f1p05178	-6.58	4.59e-06	0.00835	1.1	5.06	3.47	6.28	0.65	4.98	6.54	0.45	0.38	0.41	1.31	0.68	0.41	0.64
	c108504f1p04880	-6.04	3.45e-06	0.01	1.47	3.37	3.22	3.22	0.55	4.9	5.42	0.53	0.46	0.25	0.88	0.63	0.3	0.62
	c108505f1p04924	-8.56	5.17e-06	0.01	0.27	6.87	5.72	5.58	0.22	6.47	5.21	0.04	0.55	0.69	1.43	0.27	0.23	0.34
	c108506f1p04906	-6.08	7.75e-06	0.00334	2.82	10.51	5.78	9.68	1.86	9.11	8.37	0.64	0.44	1.11	2.64	1.84	0.57	0.68
	c10850f9p21284	-6.05	2.31e-05	0.00445	6.37	23.15	27.98	24.11	3.21	27.85	35.17	2.9	1.97	3.19	7.34	4.56	0.87	3.59
	c108515f1p04705	2.89	-0.00034	0.01	294.83	7.35	11.23	1.37	360.68	21.29	25.21	314.82	338.49	286.35	243.5	240.6	337.68	327.57
	c10851f1p01356	-4.6	9.29e-06	0.00598	1.65	11.12	10.67	10.54	3.07	12.45	13.7	1.1	1.29	1.84	3.78	3.83	0.41	1.48
	c108523f1p04391	-3.95	1.89e-05	0.00312	10.52	25.08	28.99	22.61	4.59	22.43	24.07	5.42	2.63	6.31	7.84	8.53	1.79	2.51
	c108534f1p14543	-8.84	6.46e-06	0.00187	2.72	8.4	6.62	5.03	1.83	4.54	8.01	0.71	0.44	0.58	1.22	0.64	0.22	0.39
	c10854f1p0998	-8.8	5.69e-06	0.01	0.37	9.11	8.5	4.43	0.94	5.73	4.25	0.45	0.37	0.76	0.66	0.77	0.22	0.55
	c108571f1p05077	-5.77	8.8e-06	0.01	3.8	14.86	7.06	8.25	1.42	13.24	7.21	1.51	1.27	1.31	2.63	1.63	0.66	0.67
	c10858f8p41278	-4.15	9.21e-06	0.01	5.43	9.89	13.27	18.1	1.79	7.07	10.49	2.62	1.46	3.08	4.21	3.7	0.35	0.49
	c108604f1p14790	-4.88	1.36e-05	0.00302	6.06	18.95	13.13	16.27	2.85	16.91	16.84	2.18	1.86	2.01	5.48	4.12	1.29	1.73
	c108610f1p05112	-6.24	6.3e-06	0.00707	1.83	8.77	5	6.12	0.98	9.1	7.26	0.6	0.89	0.67	1.66	1.47	0.29	0.68
	c108630f1p05017	-6.1	5.81e-06	0.00683	2.33	7.72	3.88	6.09	0.69	7.1	8.32	0.5	0.95	0.59	1.52	1.44	0.3	0.62
	c108631f1p04845	-5.77	7.21e-06	0.00312	3.09	10.55	7.81	6.13	1.66	8.6	7.54	0.97	0.97	1.28	1.52	2.03	0.35	0.76
	c10863f1p01152	-5.84	5.88e-06	0.00477	3.19	4.52	7.96	7.84	0.51	5.42	7.58	0.53	0.63	1.14	1.76	1.18	0.4	0.71
	c108643f1p03038	-5.09	3.92e-05	0.00409	15.98	49.18	67.62	41.02	7.1	42.68	40.58	5.95	5.17	9.54	12.76	11.83	2.95	3.71
	c108649f1p04421	-6.28	5.56e-06	0.00447	1.56	5.06	6.52	7.57	1.02	6.92	5.65	0.97	0.21	0.77	1.68	1.05	0.2	0.57
	c108663f1p04617	-7.6	7.55e-06	0.00611	2.39	7.67	8.85	5.19	2.07	13.19	5.71	0.57	0.34	0.87	1.71	1.02	0.73	0.71
	c108675f1p04410	3.08	-2.99e-05	0.000237	16.32	3.62	3.28	3.28	18.67	6.45	5.28	17.05	24.98	26.99	27.21	27.74	27.98	23.12
	c108680f1p04804	-7.53	4.42e-06	0.00412	2.09	4.57	4.67	3.9	0.81	4.18	6.66	0.51	0.12	0.49	1.45	0.49	0.19	0.32
	c10868f6p11136	-4.93	6.16e-06	0.00361	2.72	8.58	6.58	7.63	1.38	6.9	6.51	1.24	0.73	1.93	2.62	1.4	0.1	0.15
	c108708f1p14456	-6.45	3.53e-06	0.00988	1.39	5.28	4.15	3.44	0.53	3.79	3.63	0.47	0.36	0.61	0.85	0.66	0.18	0.31
	c108718f1p05009	-5.77	8.27e-06	0.0038	4.54	10.44	7.39	7.7	0.95	9	12.41	2.06	0.99	1.44	1.81	1.41	0.31	1.07
	c108736f1p15032	-5.45	1.39e-05	0.0035	6.02	21.78	16.33	12.99	2.75	14.9	15.07	2.39	1.8	2.34	4.4	3.07	1	1.49
	c10873f1p01290	-6.14	1e-05	0.00614	2.88	14.96	11.6	8.31	1.41	13.19	10.63	1.04	0.71	1.82	3.08	2.67	0.17	0.78
	c10876f4p11585	-5.92	5.5e-06	0.00603	2.11	5.18	9.44	4.08	1.68	7.21	4.72	0.85	0.37	0.96	1.51	1.39	0.42	0.32
	c108783f1p13849	-5.49	1.27e-05	0.00529	5.58	20.22	13.95	13.57	1.71	16.46	10.74	2.22	2.03	2.12	3.71	2.67	1.22	1.02
	c108789f1p04848	-11.77	6.55e-06	0.00221	2.11	7.95	6.85	3.38	2.17	5.26	8.65	0.56	0.2	0.17	0.97	0.65	0.28	0.27
	c108791f1p04586	-3.68	1.68e-05	0.00639	12.72	27.35	24.54	17.31	4.08	23.14	16.54	5.23	2.58	2.87	10.42	10.05	1.46	1.58
	c1087f4p01218	-12.17	3.69e-06	0.00717	1.42	2.18	4.91	3.07	0.21	5.67	2.91	0.12	0.03	0.25	0.61	0.46	0.09	0.1
	c108815f1p05012	3.41	-0.000254	0.00511	150.1	1.05	6.33	1.11	248.98	14.8	7.08	218.54	246.23	198.49	163.34	158.45	251.15	226.66
	c10881f1p01272	-7.59	3.04e-06	0.01	2.04	1.74	4.7	2.54	0.57	3.44	3.57	0.41	0.2	0.83	0.19	0.28	0.18	0.36
	c108827f1p15108	-6.24	5.4e-06	0.00855	1.99	9.15	5.17	6.12	0.71	4.39	5.92	0.71	0.55	0.86	1.55	0.84	0.22	0.62
	c108830f1p15171	-6.71	5.8e-06	0.00959	0	7.51	7.62	5.92	1.26	5.99	7.33	0.03	0.36	0.94	1.57	0.78	0.71	0.92
	c108844f1p45061	-4.66	5.13e-05	0.00299	34.33	80.36	58.15	66.26	9.51	53.43	48.61	14.81	4.43	10.54	19.17	19.86	1.66	4.82
	c108857f1p14556	-7.88	4.07e-06	0.00583	1.14	6.15	4.14	4.6	0.58	3.16	4.04	0.13	0.44	0.58	1.01	0.44	0.17	0.25
	c108863f1p04585	-6.51	5.47e-06	0.0046	2.52	7.02	3.92	5.98	0.84	8.1	4.98	0.6	0.38	0.78	1.64	0.71	0.39	0.62
	c108868f1p04632	-6.97	6.96e-06	0.00409	1.95	8.61	7.75	8.69	0.97	5.82	8.44	0.63	0.4	0.88	2.41	1.02	0.1	0.62
	c108875f1p03876	-9.58	3.07e-06	0.00979	1.47	3.26	3.86	1.4	0.99	2.81	4.05	0.36	0.24	0.23	0.55	0.3	0.03	0.14
	c10888f1p0835	-5.94	4.96e-06	0.00718	3.85	6.63	5.97	2.24	0.12	5.88	6.27	0.62	0.6	1.81	1.19	0.61	0.13	0.25
	c108904f1p14520	-6.16	4.94e-06	0.0038	2.47	6.18	6.07	4.74	1	6.2	4.69	0.46	0.74	0.6	1.46	1.02	0.35	0.44
	c108912f1p04823	-6	8.65e-06	0.00793	3.65	11.05	14.82	8.97	0.95	5.58	9.92	1.31	0.53	2.12	2.97	1.26	0.26	0.71
	c108913f1p44559	-5.42	4.35e-06	0.00648	1.66	4.53	4.61	4.6	1.05	5.7	6.4	0.59	0.23	0.72	1.87	1.07	0.2	0.59
	c108942f1p03935	-5.46	1.33e-05	0.01	5.05	9.86	25.89	14.06	2.64	9.64	20.91	2	0.65	3.52	4.54	2.74	0.64	2.05
	c108950f1p04446	-10.71	4.53e-05	0.00124	16.69	55.56	46.76	27.34	14.79	35.63	61.16	3.85	1.8	2.65	7.81	4.2	1.67	2.12
	c108951f1p24328	-4.19	8.61e-05	0.00378	42.27	120.61	117.74	129.04	19.84	81.4	106.87	16.99	16.5	23.36	40.67	32.52	6.16	11.1
	c108965f1p04809	-6.89	3.61e-06	0.00939	1.69	5.19	1.34	4.82	0.6	3.6	4.4	0.37	0.35	0.25	1.13	0.39	0.12	0.53
	c108977f1p15058	-5.15	5.54e-06	0.00668	2.74	6.7	6.8	8.06	0.9	7.27	3.53	0.91	0.43	1.33	2.47	1.07	0.46	0.32
	c108986f1p05120	-9.46	3.51e-06	0.00661	1.82	3.88	3.55	3.43	0.55	3.19	4.14	0.18	0.23	0.35	0.4	0.61	0.02	0.38
	c109007f1p14606	-5.8	4.69e-06	0.00442	1.71	4.82	6.09	6.39	0.88	5.02	4.3	0.3	0.26	0.69	2.36	0.72	0.3	0.41
	c109017f1p04710	-7.04	3.22e-06	0.01	1.37	4.62	2.54	4.01	0.45	3.9	2.88	0.14	0.33	0.26	1.05	0.61	0.1	0.32
	c109036f1p02131	-4.9	2.73e-05	0.0047	13.18	26.6	39.26	41.75	3.49	25.28	36.24	4.99	2.8	6.74	11.51	7.56	1.15	3.14
	c109037f1p04398	-6.3	3.29e-06	0.01	1.1	4.28	3.74	3.01	1.11	3.59	3.83	0.32	0.2	0.46	0.98	0.78	0.18	0.36
	c10904f3p2812	-9.4	5.43e-06	0.01	1.37	5.45	3.68	10.03	0.7	5.55	4.54	0.64	0	0.28	1.52	0.63	0	0.26
	c109052f1p14969	-4.44	4.21e-06	0.01	2.29	7.71	4.51	2.53	1.35	5.13	5	1.17	0.64	1.05	1.15	1.44	0.54	0.45
	c109093f1p05186	-9.91	4.5e-06	0.00322	2.1	3.12	4.71	6.81	1.07	3.4	5.03	0.29	0.04	0.35	0.8	0.71	0.17	0.29
	c109094f1p05028	-5.95	8.03e-06	0.00617	2.36	12.27	8.9	9.65	1.16	9.17	7.2	1.08	0.79	1.26	2.2	1.67	0.75	0.76
	c109116f1p04842	1.99	-5e-05	0.01	58.05	13	12.34	15.17	63.06	12.72	16.3	56.02	58.03	55.28	55.7	45.99	53.44	54.42
	c109131f1p04439	-4.94	3.64e-06	0.01	1.73	4.15	4.38	4.79	0.69	4.76	4.13	0.49	0.42	0.73	1.6	1.01	0.4	0.33
	c109139f1p04779	-5.11	1.48e-05	0.00312	5.79	21.51	16.72	17.25	3.11	17.46	15.54	2.06	2.05	2.86	4.92	4.22	1.17	1.79
	c109140f1p04179	-5.45	8.79e-06	0.00382	3.16	10.92	8.84	11.76	1.56	9.16	11.2	1.07	0.79	2.24	3.23	1.68	0.49	0.88
	c109141f1p04903	-7.44	6.42e-06	0.00293	1.94	7.22	5.59	6.86	1.12	7.47	8.03	0.68	0.55	0.76	1.45	0.88	0.3	0.53
	c109156f1p14440	-8.79	4.84e-06	0.00337	2.03	6.03	6.16	4.55	0.29	4.72	4.07	0.59	0.31	0.51	0.91	0.33	0.15	0.37
	c109171f1p14519	-5.95	2.17e-05	0.00401	6.05	31.23	24.49	22.3	3.55	23.28	27.85	2.02	2.11	3.58	5.96	5.44	1.96	2.23
	c10919f1p01708	-5.47	1.73e-05	0.00562	5.34	28.79	18.5	19.64	3.46	17.25	20	2.32	1.91	2.76	6.08	4.98	1	1.58
	c109258f1p04695	-5.48	7.34e-06	0.0065	2.67	11.15	5.85	8.73	1.11	8.78	8.82	0.95	0.8	1.06	2.84	1.55	0.55	0.85
	c10929f1p01126	-5.56	3.36e-06	0.01	4.15	2.93	4.4	2.7	0	4.22	3.53	1.31	0.29	0.8	0.95	0	0	0.59
	c10930f3p1890	-8.02	1.02e-05	0.00993	3.2	10.72	16.26	8.03	0.76	6.57	15.85	0.42	0.7	1.87	2.42	1.21	0	1.04
	c109313f1p04815	-6.42	3.45e-06	0.01	0.93	3.37	2.9	5.34	0.61	4.48	4.16	0.15	0.29	0.55	1.05	0.83	0.14	0.38
	c109317f1p04395	-5.14	3.56e-05	0.0053	11.8	51.51	41.96	48.85	5.53	43.18	34.91	4.55	4.43	6.2	16.32	8.4	2.78	3.56
	c109365f1p14771	-4.87	6.39e-06	0.00574	3.55	8.08	5.85	10.78	1.21	6.98	5.8	1.18	0.52	1.66	2.16	2.28	0.37	0.49
	c109379f1p84434	-3.8	5.81e-05	0.01	28.45	90.52	63.07	105.38	15.71	63.84	64.72	10.62	6.72	17.53	36.75	31.34	2.95	7.79
	c109424f1p03956	-5.42	1.72e-05	0.00499	4.38	22.34	21.16	23.14	2.71	20.84	18.69	1.45	1.89	3.44	6.68	4.76	1.19	1.49
	c109429f1p14419	-4.45	3.84e-06	0.01	3.48	3.91	3.84	4.04	0.47	7.37	2.82	0.89	0.49	0.29	2.09	1.19	0.79	0.09
	c109449f1p04786	-5.01	3.87e-06	0.01	1.23	5.85	4.32	4.2	0.85	2.69	6.08	0.28	0.75	0.56	1.33	1.36	0.05	0.71
	c10945f2p3795	-4.92	4.49e-06	0.01	6.07	6.41	5.01	6.2	0.92	3.01	1.74	1.5	0.26	0.48	2.08	0.9	0.28	0.47
	c109472f1p04687	-6.35	1.1e-05	0.00952	3.28	19.3	14.07	11.09	1.46	9.14	10.76	1.67	1.43	1.9	2.68	2.03	0.49	0.67
	c109484f1p04744	-4.46	5.35e-06	0.00895	2.19	7.02	8.1	7.28	0.8	5.61	5.51	0.99	0.97	1.37	2.58	1.37	0.35	0.55
	c109485f1p04639	-13.49	4.5e-06	0.00343	2.36	6.81	3.67	4.82	0.35	2.76	3.8	0.1	0.17	0.28	0.57	0.46	0.05	0.2
	c109509f1p04136	-6.92	5.47e-06	0.00254	1.99	4.84	5.31	6.54	1.14	6.31	6.66	0.57	0.44	0.56	1.67	0.94	0.15	0.41
	c10952f23p1768	-5.35	2.5e-05	0.00291	12.75	27.44	40.28	31.23	6.24	16.27	30.6	2.42	1.89	8.18	6.46	7.23	0.88	3.76
	c109533f1p14399	-7.51	3.12e-06	0.01	0.93	2.56	5.08	2.77	0.32	2.68	4.03	0.2	0.18	0.39	1.1	0.24	0.08	0.25
	c109553f1p14897	-5.44	4.01e-06	0.00932	1.09	5.61	5.39	3.71	0.66	5.07	3.98	0.39	0.5	0.97	1.13	0.82	0.48	0.39
	c109562f1p04216	-5.21	1.69e-05	0.00983	5.43	24.41	16.47	27.39	2.42	15.65	20.19	1.96	1.89	2.41	8.79	4.6	0.43	1.41
	c109564f1p03495	-4.43	1.3e-05	0.01	4.53	23.74	16.08	17.72	2.88	10.1	15.52	2.14	2.4	3.09	6.66	3.89	0.52	1.72
	c10957f1p01859	-4.06	4.87e-06	0.0096	2.53	6.91	4.29	7.31	0.92	5.64	6.62	0.84	0.65	1.3	2.44	1.79	0.72	0.67
	c109589f1p05136	-6.57	5.86e-06	0.00609	1.61	6.29	9.21	6.58	0.79	5.32	6.3	0.55	0.63	1.02	1.45	0.81	0.35	0.7
	c1095f12p1616	-3.4	4.9e-05	0.00565	37.7	45.95	83.16	68.27	12.23	75.94	64.34	19.28	8.41	18.75	28.51	29.36	4.71	5.15
	c109634f1p13138	-5.97	6.26e-06	0.00753	2.45	10.89	5.88	6.83	1.1	6.57	5.35	0.17	0.6	1.74	2.06	1.61	0.18	0.2
	c109650f1p03526	-5.35	1.17e-05	0.00423	3.47	15.94	10.17	15.74	2.89	13.54	14.2	1.39	0.34	1.89	4.82	3.66	0.6	1.48
	c109660f1p04451	-4.11	1.55e-05	0.00392	11.3	19.93	16.63	25.75	3.56	13.89	19.23	4.29	1.3	4.14	9.02	5.19	0.83	2.04
	c109666f1p04661	-6.36	3.6e-06	0.01	1.21	4.18	3.06	3.42	0.52	6.25	3.39	0.35	0.24	0.74	0.86	0.72	0.24	0.33
	c109685f1p03212	-4.47	8.87e-06	0.00617	3.28	13.61	7.46	9.75	2.53	12.67	11.21	1.23	0.96	1.89	4.04	3.7	0.49	1.23
	c109698f1p04533	-12.81	3.61e-06	0.0086	0.87	5.08	3.95	2.77	0.7	1.38	5.14	0.23	0.18	0.17	0.25	0.46	0.1	0.16
	c109702f1p04524	-8.2	5.33e-06	0.00733	1.37	8.53	4.3	4.32	0.77	5.52	6.4	0.31	0.33	0.38	1.52	0.6	0.12	0.54
	c109722f1p34485	-7.57	1.11e-05	0.00354	3.88	13.79	11.44	9.11	1.03	14.12	13.04	0.84	1.01	1.05	3.28	1.59	0.32	0.69
	c109742f1p05032	-6.27	8.61e-06	0.00427	3.42	13.48	11	7.7	1.47	8.4	8.1	1.05	0.6	1.29	2.63	1.59	0.69	0.69
	c10975f1p01150	-4.7	1.01e-05	0.01	6.1	9.2	14.65	15.13	1.13	6.43	16.77	2.96	1.79	3.6	4.36	0.71	0	1.34
	c109788f1p04526	-6.67	6.88e-06	0.00441	2.57	9.07	4.15	8.71	1.54	9.42	6.35	0.49	0.22	0.55	2.64	1.51	0.39	0.48
	c10980f1p02050	-7.54	7.95e-06	0.01	1.86	8.92	6.77	7.75	0.4	8.06	14.34	0.18	0.71	0.62	2.21	1.32	0.27	1.08
	c10981f2p01843	-5.31	7.69e-06	0.0046	3.76	5.41	7.3	10.97	1.52	10.59	10.23	1.01	0.72	0.98	3.09	2.51	0.18	0.88
	c109829f1p02825	-4.75	1.43e-05	0.01	7.54	9.63	14.82	16.55	2.71	16.98	29.29	3.32	1.19	2.81	5.93	3.61	1.21	2.49
	c109831f1p05272	-5.81	6.63e-06	0.00376	2.72	8.81	5.86	8.52	1.17	8.12	6.43	0.68	0.69	0.64	2.72	1.46	0.39	0.58
	c109842f1p14679	-4.17	7.13e-06	0.00506	3.52	7.96	8.95	8.9	1.29	9.51	9.85	1.76	0.99	1.75	2.6	3.06	0.69	1.12
	c109845f1p04651	-7.13	3.92e-06	0.00883	1.38	4.52	5.78	2.85	0.23	5.19	3.51	0.35	0.25	0.6	0.73	0.61	0.5	0.25
	c109861f1p24732	-5.74	7.96e-06	0.00512	2.83	11.1	8.01	6.75	1.28	10.84	9.75	1.1	1	1.07	2.27	1.81	0.69	0.87
	c109862f1p04639	-5.51	9.64e-06	0.01	2.51	14.34	12.15	10.15	2.55	4.27	16.5	0.99	0.74	1.93	3.49	2.66	0.22	1.31
	c109888f1p04256	-5.11	3.71e-06	0.01	1.45	5.09	3.39	5.3	0.53	5.11	3.03	0.65	0.37	0.6	1.86	0.63	0.24	0.33
	c109895f1p02668	-4.08	7.19e-06	0.00511	4.2	9.64	6.61	11.34	1.69	9.25	7.92	1.32	1.15	1.87	3.17	3.14	0.54	1.25
	c10989f1p01049	-7.26	5.62e-06	0.01	1.18	5.91	4.27	5.67	1.24	10.37	5.21	0.78	0.55	0.79	0.31	1.08	0.75	0.4
	c1098f13p51520	-12.82	8.84e-06	0.00747	3.34	13.86	8.53	9.84	0.62	3.23	9.98	0.44	0.27	0.9	1.2	0.54	0.15	0.36
	c109914f1p13264	-4.83	5.81e-06	0.00398	2.58	7.95	7.49	7.09	1.37	5.29	6.51	0.41	0.43	1.44	2.53	1.84	0.51	0.76
	c109916f1p15123	-5.23	6.34e-06	0.00423	2.71	8.26	7.39	6.43	0.84	7.62	7.76	1.09	0.82	1.48	2.1	1.26	0.48	0.62
	c109938f1p04904	-4.78	5.36e-06	0.00904	2.98	6.95	8.53	4.05	0.9	7.77	4.53	1.18	0.65	1.68	1.65	1.18	0.55	0.57
	c10993f1p0634	-8.61	3.25e-06	0.01	0.98	5.6	3.15	4.03	0.66	1.47	2.92	0.12	0.46	0.12	0.91	0.24	0	0.33
	c109955f1p04552	-7.19	4.66e-06	0.00381	1.68	5.64	5.91	4.7	0.94	4.58	5.19	0.46	0.25	0.68	1.32	0.76	0.27	0.25
	c109969f1p34671	-5.18	1.31e-05	0.00885	5.52	14.57	8.54	22.68	2.44	14.74	17.91	1.61	1.54	1.23	6.07	4.25	0.55	1.43
	c109980f1p05395	-6.21	3.55e-06	0.01	1.83	4.51	3.78	3.24	0.51	4.4	4.22	0.44	0.24	0.76	1.06	0.5	0.23	0.4
	c110006f1p04775	-5.9	4.51e-06	0.00501	1.83	6.75	4.77	3.92	1.05	5.92	4.56	0.52	0.53	0.64	0.93	1.49	0.34	0.43
	c110009f1p04790	-8.69	8.09e-06	0.002	2.96	10.88	7.11	6.99	1.88	7.61	9.45	0.86	0.46	0.44	1.73	1	0.42	0.47
	c110029f1p1906	-5.72	7.57e-06	0.00468	1.91	9.54	8.8	6.94	1.67	10.55	8.67	0.99	0.73	1.75	1.92	1.47	0.99	0.55
	c110032f1p04905	-11.48	1.64e-05	0.00156	5.81	18.27	17.8	11.1	5.07	11	23.31	1.28	0.71	0.71	2.92	1.11	0.71	0.61
	c110045f1p14988	-5.8	4.33e-06	0.00653	1.53	3.93	4.57	6.33	0.55	5.05	5.12	0.52	0.54	0.36	1.96	0.57	0.36	0.37
	c11006f2p21128	-8.04	7.39e-06	0.00481	2.96	10.4	4.85	10.83	1.29	7.76	5.45	0.46	0.29	1	1.32	1.27	0.69	0.37
	c11007f2p0618	-8.36	9.76e-06	0.00425	3.6	9.3	7.24	11.25	0.92	10.29	15.16	1.32	0.87	0.86	1.87	0.41	0.36	1.22
	c110081f1p05348	-5.17	5.35e-06	0.00825	1.43	7.97	5.38	7.46	1.09	5.43	5.99	0.45	0.71	1.09	1.91	1.49	0.57	0.51
	c110096f1p14530	-4.83	8.14e-06	0.00776	2.71	7.84	8.04	9.84	1.79	11.3	13.18	1.48	0.23	0.82	3.69	3.42	0.47	1.22
	c11009f1p01017	-5.76	7.76e-06	0.00211	8.39	5.22	8.32	5.84	1.53	8.61	10.81	2.27	0.65	2.3	0.97	1.41	0.44	0.41
	c110117f1p04625	-6.59	1.57e-05	0.00252	5.73	18.5	19.07	11.34	4.56	14.03	23.86	2.7	1.04	1.74	3.92	3.45	0.78	1.1
	c110128f1p24885	-3.25	8.67e-06	0.00995	5.72	11.09	13.75	9.83	2.05	12.32	14.53	3.09	1.49	3.35	5.2	5.9	1.23	1.06
	c11013f1p11443	-14.92	2.12e-05	0.00608	2.32	16.9	25.92	25.21	1.15	16.94	31.01	0.57	0.81	0.89	2.98	0.93	0.39	1.45
	c110145f1p04650	-12.95	1.47e-05	0.00289	4.47	16.46	16.05	7.7	4.13	10.41	22.66	0.99	0.58	0.54	2.31	0.95	0.36	0.6
	c110153f1p34935	-5.57	1.56e-05	0.00385	5.31	24.18	18.97	17.2	3.31	16.96	14.52	2.03	2.23	2.59	5.15	3.52	1.18	1.33
	c110154f1p05091	-5.99	1.33e-05	0.00378	3.75	14.13	17.26	10.5	3.73	13.8	20.93	2.52	1.2	1.43	3.17	3.46	1.01	1.25
	c110172f1p04804	-6.3	0.000419	0.01	131.75	763.56	438.28	540.83	85.62	366.93	303.71	42.27	10.97	50.27	215.04	70.05	12.24	16.58
	c11017f1p11213	-4.1	0.000181	0.0066	96.5	297.84	283.84	202.2	30.33	236.48	170.23	43.64	48.83	38.18	71.93	79.71	18.09	21.01
	c110182f1p04546	-5.11	4.83e-06	0.01	1.3	7.87	6.34	4.73	0.6	5.18	5.47	0.54	0.57	1.09	1.9	1.33	0.29	0.43
	c110185f1p04205	-7.66	4.4e-06	0.01	2	4.8	5.34	2.14	0.53	7.94	3.37	0.48	0.34	0.38	1.02	0.6	0.32	0.28
	c110188f1p04793	-9.57	4.46e-06	0.00387	1.81	6.15	5.41	3.01	1.04	2.41	5.48	0.39	0.29	0.24	0.88	0.54	0.09	0.23
	c110220f1p12813	-5.01	1.3e-05	0.00501	8	14.79	15.22	16.6	2.26	21.36	8.36	3.7	1.43	1.96	5.52	3.35	0.87	0.46
	c110221f1p05045	-6.85	1.24e-05	0.00288	4.07	11.67	15.4	14.94	1.7	15.18	13.37	0.69	0.66	1.66	4.39	2.17	0.66	0.92
	c110243f1p04542	-6.44	4.51e-06	0.0089	1.06	6.93	3.29	4.71	0.88	4.74	6	0.44	0.38	0.53	1.4	0.68	0.3	0.55
	c110244f1p04763	-10.61	8.7e-06	0.00205	2.83	10.32	7.95	8.24	1.15	9.03	9.74	0.51	0.17	0.54	1.66	0.72	0.52	0.51
	c110261f1p15097	-8.6	6.86e-06	0.002	3.3	7.92	7.44	4.1	1.82	5.68	9.44	0.83	0.33	0.55	1.69	0.53	0.33	0.36
	c110267f1p04789	-10.19	1.16e-05	0.00501	2.33	15.43	9.59	7.13	2.38	12.48	16.88	0.52	0.73	1.1	1.71	1	0.34	1.1
	c110270f1p24896	-7.52	3.15e-06	0.01	1.38	3.33	4.35	2.28	0.76	2.75	4.39	0.3	0.24	0.35	0.89	0.33	0.18	0.26
	c110271f1p24189	-7.87	4.95e-06	0.00288	1.3	4.07	6.54	5.19	1.45	6.18	4.19	0.66	0.19	0.34	1.22	0.62	0.4	0.24
	c110274f1p65192	-4.87	8.34e-06	0.0028	3.69	10.37	10.51	9.5	2.01	9.07	10.3	1.45	0.69	1.29	2.53	4.18	0.5	0.76
	c11028f1p0455	-10.23	9.31e-06	0.00255	3	8.78	6.58	13.46	1.83	10.81	8.64	0.65	1.1	0.33	0.73	1.24	0.49	0.64
	c110290f1p14805	-6.47	1.65e-05	0.00724	3.5	15.74	13.15	21.18	2.54	23.01	24.61	1.53	1.68	1.51	5.27	3.68	0.58	1.77
	c1102f10p21065	-5.84	2.65e-05	0.00348	12.32	35.17	17.79	31.44	4.84	35.79	31.74	2.51	2.18	4.26	9.23	7.04	1.05	2.67
	c110302f1p04263	-4.36	1.07e-05	0.00332	5.23	14.34	13.04	15.05	2.46	12.29	11.46	2.29	1.71	2.95	4.67	2.9	1.05	1.37
	c110305f1p04321	-4.73	5.26e-06	0.01	2.08	5.89	4.53	4.87	1.25	9.03	7.49	1.23	0.5	1.26	1.39	1.66	0.79	0.61
	c110325f1p04896	-3.98	3.98e-06	0.01	1.8	5.2	5.65	6.36	0.97	3.14	5.03	0.66	0.65	1.3	2.06	1.26	0.32	0.84
	c110337f1p04789	-9.95	1.01e-05	0.00156	3.75	12.83	10.21	7.53	2.74	7.97	12.68	1.04	0.51	0.6	1.49	1.29	0.44	0.43
	c110356f1p04621	-4.23	5.32e-06	0.00739	3.11	9.11	6.04	5.92	1.04	6.15	5.43	1.17	0.77	1.28	2.07	2.3	0.41	0.69
	c110357f1p04512	-6.32	3.83e-06	0.01	1.95	4.53	2.43	2.94	0.87	7.02	3.71	0.48	0.46	0.49	0.72	0.82	0.52	0.22
	c110375f1p14778	-4.2	2.47e-05	0.01	8.54	26.66	23.82	30.49	6.19	43.82	36.13	3.94	5.64	2.41	10.65	14.94	1.9	2.33
	c110413f1p05218	-5.72	5.59e-06	0.00478	1.99	7.57	5.42	4.92	1.1	7.68	6.52	0.56	0.52	1.23	1.51	1.41	0.39	0.53
	c110426f1p05178	-6.1	6.26e-06	0.00643	2.02	6.65	9.09	6.37	0.36	7.32	7.41	0.41	0.3	1.29	2.67	0.56	0.31	0.88
	c110438f1p93682	-4.43	5.89e-05	0.00491	29.55	64.94	70.8	77.45	10.17	98.9	61.9	11.68	5.89	14.46	26.75	22.18	5.56	6.88
	c110444f1p04701	-12.18	7.21e-06	0.00226	2.21	8.48	7.85	3.69	2.47	5.51	9.78	0.44	0.24	0.35	0.86	0.61	0.43	0.35
	c110446f1p04790	-5.81	3.6e-06	0.01	1.93	4.2	6.54	3.01	0.73	2.71	3.3	0.37	0.35	0.44	1.43	0.86	0.14	0.28
	c110450f1p14996	3.8	-0.000289	0.00279	142.38	1.24	3.98	0.58	248.72	16.32	7.75	238.15	243.07	216.48	170.99	184.19	269.86	277.5
	c110463f1p04605	3.81	-0.00456	0.00156	2279.38	31.92	89.15	38.28	3637.2	363.54	178.36	3726.12	3869.48	3523.37	3184.18	3091.49	3886.68	3938.6
	c110510f1p05442	-7.65	3.44e-06	0.00854	1.28	5.88	3.38	3.49	0.73	3.15	2.83	0.45	0.22	0.74	0.84	0.19	0.13	0.14
	c110548f1p13814	-5.89	6.47e-06	0.00922	1.1	10.71	7.42	8.26	1.84	6.39	5.01	0.37	0.62	0.97	1.84	2.28	0.35	0.49
	c110550f1p24940	-3.99	9.97e-05	0.00603	48.58	149.52	137.8	151.5	22.77	94.96	124.19	16.6	10.09	36.22	52.24	47.98	8.18	11.52
	c11056f13p2866	-3.55	2.1e-05	0.01	18.75	25.62	42.06	12.77	4.87	31.78	26.61	9.63	5.14	9.18	6.21	10.15	2.2	3.29
	c110572f1p04945	-5.6	3.46e-06	0.01	0.82	4.12	4.23	4.05	0.55	5.12	3.84	0.57	0.4	0.58	1.08	0.87	0.27	0.28
	c110586f1p04844	-6.57	3.53e-06	0.00956	1.46	4.64	3.82	4.12	0.68	4.13	3.19	0.18	0.21	0.3	1.42	0.71	0.19	0.35
	c110589f1p05139	-6.77	3.89e-06	0.00828	1.17	4.93	3.6	6.13	0.73	2.66	4.26	0.21	0.36	0.26	1.39	0.56	0.2	0.5
	c110604f1p12609	-6.18	8.24e-06	0.00643	1.23	11.93	8	10.26	1.77	8.32	10.11	0.57	0.81	1.5	1.77	2.06	0.47	1.18
	c110624f1p04436	-5.35	3.18e-05	0.00271	15.86	33.9	46.11	33.89	5.67	46.17	28.52	5.15	3.43	7.08	9.04	9.08	2.73	2.78
	c110661f1p14805	3.77	-0.00149	0.00103	927.29	14.73	21.44	19.24	964.98	127.62	105.64	1052.02	1554.27	1133.86	953.17	1233.14	1167.34	1130.1
	c110674f1p04565	-4.52	7.47e-06	0.01	2.3	8.03	7.81	7.04	1.7	11.74	12.58	1.38	0.88	1.07	3.07	2.79	0.8	1.32
	c110684f1p14774	-6.08	8.14e-06	0.00282	3.13	9.25	9.67	10.11	1.29	9.26	8.13	1.07	0.56	1.18	2.6	1.32	0.7	0.92
	c110690f1p14413	-6.57	4.91e-06	0.00929	1.65	8.63	5.35	4.83	0.81	4.8	3.97	0.71	0.67	0.67	1.17	0.8	0.1	0.44
	c110707f1p04547	-5.01	8.97e-05	0.00646	31.67	150.65	108.75	122.65	30.4	78.36	75.35	14.64	4.85	14.29	54.15	18.7	6.08	6.67
	c110710f1p24700	-6.4	1.14e-05	0.00614	3.69	19.2	8.59	11.61	2.32	12.92	12.19	1.08	1.05	1.29	3.38	2.2	1.12	0.92
	c110747f1p22634	-5.61	2.66e-05	0.00617	9.87	30.44	21.94	38.44	4.09	41.98	25.82	3.61	1.89	4.39	10.38	5.81	2.29	2.37
	c110755f1p24860	-6.17	7.49e-06	0.0026	4.19	9.26	8.48	6.97	0.81	9.63	7.11	1.02	0.68	1.5	1.61	1.36	0.83	0.53
	c110769f1p05170	-10.81	2.79e-06	0.01	0.46	3.14	2.03	1.55	0.81	3.97	4	0.13	0.07	0.1	0.4	0.31	0.28	0.18
	c110785f1p04860	-9.46	3.34e-06	0.0078	1.17	3.41	4.5	1.95	0.92	3.36	4.21	0.31	0.12	0.34	0.81	0.26	0.05	0.17
	c110799f1p04605	-4.5	5.91e-06	0.0063	2.19	7.8	6.59	6.74	1.18	8.18	7.4	1.09	0.79	1.19	2.11	2.15	0.83	0.73
	c110813f1p14868	-5.35	3.94e-06	0.00924	1.5	4.96	4.81	5.13	0.67	4.53	4.49	0.69	0.35	0.61	1.9	0.68	0.14	0.52
	c110822f1p04609	-7.52	4.19e-06	0.00468	1.52	4.91	2.79	5.38	1.08	3.77	5.87	0.4	0.14	0.24	1.39	0.67	0.19	0.32
	c110829f1p14487	-4.24	5.76e-06	0.0064	2.91	8.02	7.86	6	1.34	6.64	7.08	0.55	0.48	1.53	4.39	1.35	0.5	0.61
	c110837f1p24858	-7.35	3.36e-06	0.00967	1.35	3.37	2.66	4.61	0.71	4.45	3.37	0.34	0.32	0.26	0.87	0.66	0.07	0.28
	c110853f1p04626	-5.56	1.14e-05	0.00624	5.13	15.29	19.79	10.95	1.85	8.73	12.09	1.86	1.05	1.69	4.68	2.9	0.34	0.77
	c110859f1p03844	-4.61	9.93e-06	0.00455	3.6	14.86	11.62	12.15	2.35	12.63	10.18	1.66	1.78	2.06	4.22	3.38	0.64	0.87
	c110860f1p05049	-4.68	4.96e-06	0.00524	3.36	7.91	4.48	6.38	1.56	5.1	4.85	1.37	0.66	0.43	2.33	1.55	0.53	0.33
	c110862f1p04608	-8.66	1.15e-05	0.00464	3.28	16.06	8.98	7.97	1.92	13.46	15.5	1.16	0.57	1.9	1.43	1.2	0.63	0.85
	c11086f7p1917	-4.9	4.22e-05	0.01	13.9	73.94	34.24	54.11	8.18	52.86	46.59	5.11	6.38	6.76	20.45	12.54	3.42	3.24
	c11088f2p31225	-5.59	8.95e-06	0.00658	4.96	15.39	11.41	9.44	1.28	6.29	8.56	2.25	0.64	1.55	3.24	1.85	0.46	0.27
	c110920f1p012171	-6.06	4.37e-06	0.00679	1.67	5.65	3.82	3.87	0.76	6.89	4.37	0.35	0.45	0.59	1.58	0.71	0.3	0.48
	c110941f1p04681	-5.64	3.51e-06	0.01	1.15	4.4	2.8	4.18	0.83	3.59	5.82	0.4	0.2	0.52	1.12	0.99	0.29	0.52
	c110951f1p04824	-5.58	5.14e-06	0.00672	1.8	7.81	5.66	6.4	0.73	5.08	5.08	0.33	0.53	1.09	2.07	1.15	0.18	0.49
	c110954f1p04188	-7.68	7.07e-06	0.00226	3.58	10.38	7.03	5.32	1.48	6.92	7.01	0.94	0.66	0.85	1.11	0.98	0.37	0.51
	c110957f1p04744	-6.1	3.33e-06	0.01	1.76	2.88	2.26	2.63	0.86	5.29	5.36	0.51	0.26	0.3	0.85	0.8	0.3	0.44
	c11095f3p01227	-9.67	7.51e-06	0.00618	1.01	8.68	8.54	8.74	0.17	7.69	8.79	0.12	0.71	0.62	2.43	0.17	0.09	0.38
	c110997f1p13951	-6.9	6.28e-06	0.00932	0.78	7.46	6.94	7.27	0.54	8.97	6.5	0.11	0.77	0.84	1.84	0.66	0.62	0.73
	c110998f1p13454	-6.4	8.26e-06	0.00483	3.16	12.33	5.78	8.37	1.36	10.01	9.95	0.73	0.76	1.16	2.27	1.58	0.52	0.93
	c111017f1p04997	-6.96	4.05e-06	0.00986	0.92	5.18	2.47	4.57	0.64	4.59	5.97	0.45	0.35	0.42	1.11	0.74	0.09	0.33
	c111021f1p04651	-5.15	1.56e-05	0.0034	6.63	24.99	17.36	15.91	3.63	16.97	17.23	2.61	2.06	2.67	4.96	4.31	1.36	1.98
	c111040f1p04373	-6.73	6.35e-06	0.0088	0.86	7.72	7.28	8.06	0.4	7.31	7.49	0.12	0.61	1.02	2.28	0.47	0.55	0.76
	c11106f3p0654	-4.03	3.45e-05	0.00294	14.78	43.42	44.25	46.3	11.87	45.74	42.3	5.12	7.37	9.15	16.19	18.47	1.2	4.16
	c111075f1p04588	-8.12	6.62e-06	0.00855	1.46	4.35	6.42	5.38	1.45	8.99	11.09	0.34	0.15	0.55	1.55	1.33	0.32	0.58
	c111098f1p04941	-5.6	5.15e-06	0.01	1.48	6.33	3.13	7.3	0.85	5.62	8.05	0.09	0.41	0.89	1.91	1.53	0.2	0.81
	c111114f1p04710	-7.03	2.91e-06	0.01	1.23	5.12	2.54	3.5	0.35	1.58	3.02	0.32	0.23	0.34	0.72	0.54	0.05	0.28
	c111151f1p124446	-7.4	6.13e-06	0.01	1.5	10.93	7.6	6.89	1.11	4.05	4.71	0.65	0.33	0.58	1.8	1.23	0.03	0.37
	c111156f1p04386	-5.64	5.35e-06	0.00972	1.81	7.58	4.32	5.78	0.56	7.97	5.97	0.58	0.52	0.59	2.09	0.95	0.71	0.58
	c111172f1p14394	-6.89	3.4e-06	0.01	1.29	3.17	2.94	2.16	0.63	5.94	4.25	0.24	0.33	0.55	0.77	0.66	0.23	0.18
	c111191f1p14757	-4.86	6.44e-06	0.01	1.67	8.15	6.18	5.75	1.13	10.61	9.51	0.72	0.72	1.53	2.73	1.53	0.71	0.91
	c111193f1p13977	-5.14	1.99e-05	0.00838	7.14	33.49	27.73	21.55	2.39	21.87	18.99	2.67	2.96	5.21	8.04	3.49	1.29	2.23
	c111205f1p04544	-5.07	1.71e-05	0.00315	6.82	27	19.11	19.69	5.55	20.07	14.81	2.24	2.27	3.2	5.26	7.39	0.76	1.18
	c111207f1p04592	-7.84	6.29e-06	0.00395	1.86	7.57	5.42	5.22	1.19	6.62	9.27	0.6	0.45	0.48	1.4	0.92	0.29	0.6
	c111210f1p14423	-5.84	4e-06	0.0074	1.51	5.01	3.27	5.88	0.48	4.63	4.16	0.76	0.78	0.46	1.05	0.81	0.03	0.39
	c111254f1p04292	-4.69	8.6e-06	0.0086	4.98	11.28	8.69	15.77	1.25	7.07	9.11	2.23	0.63	1.76	3.8	2.66	0.49	0.82
	c111260f1p04498	-9.26	1.13e-05	0.00289	3.39	13.83	10.76	8.88	3.08	8.03	17.27	1.04	0.56	0.59	2.64	1.08	0.51	0.62
	c111273f1p14453	-7.02	3.37e-06	0.01	1.25	2.68	4.01	3.84	0.75	3.27	5.17	0.42	0.24	0.42	0.76	0.55	0.18	0.42
	c111277f1p04613	-5.14	6.85e-06	0.00244	3.14	8.17	9.3	8.11	1.98	6.02	7.5	1.03	0.65	1.56	1.86	2.64	0.27	0.6
	c111286f1p04675	-6.77	3.07e-06	0.01	2.03	3.55	2.28	2.69	1.01	4.75	2.4	0.4	0.22	0.16	0.93	0.73	0.19	0.15
	c111287f1p04702	-7.58	4.06e-06	0.00513	1.7	4.33	3.84	4.1	0.93	5.03	4.71	0.45	0.45	0.31	0.64	0.91	0.16	0.33
	c111289f1p04169	-6.3	4.49e-06	0.00551	1.64	4.21	6.84	4.21	0.61	5.05	4.91	0.38	0.36	0.56	1.83	0.67	0.24	0.32
	c111295f1p04412	-7.2	6.04e-06	0.00509	1.47	6.3	5.36	6.17	0.87	7.71	8.48	0.48	0.54	0.49	1.68	0.98	0.28	0.6
	c11129f2p11070	-5.6	7.12e-05	0.00545	26.83	60.92	108.02	62.02	15.14	73.14	121.33	7.54	4.25	13.63	26.82	17.68	3.36	10.21
	c11130f1p01427	-4.97	2.38e-05	0.00335	10.22	26.35	28.24	36.74	4.44	27.97	26.44	3.8	2.56	5.29	9.54	7	1.17	2.9
	c111318f1p04599	-11.96	5.02e-06	0.00627	1.26	7.42	5.85	3.77	0.8	2.66	6.21	0.26	0.21	0.46	0.7	0.32	0.1	0.29
	c11133f1p0638	-7.11	3.22e-06	0.01	1.36	3.48	4.69	1.87	0.65	3.13	4.71	0.35	0.07	0.47	0.65	0.64	0.35	0.26
	c11136f1p11199	-24.78	1.15e-05	0.01	2.27	20.17	6.24	6.24	0.87	11.75	13.37	0.19	0.21	0.32	0.21	0.77	0.56	0.21
	c111372f1p04481	-6.62	3.1e-06	0.01	0.86	3.36	3.67	3.87	0.67	4.27	2.77	0.23	0.39	0.24	0.85	0.74	0.2	0.29
	c111417f1p04808	-7.26	5.1e-06	0.01	0.91	3.68	6.65	6.1	0.42	5.72	7.34	0.2	0.15	0.65	1.85	0.57	0.25	0.58
	c111428f1p21851	-4.27	8.66e-06	0.00487	3.62	15.1	9.7	9.28	3.32	10.56	8.41	2.37	1.03	2.09	3.44	3.22	0.85	1.04
	c111464f1p25065	-6.44	3.82e-06	0.00937	2.24	4.93	2.95	6.6	0.45	2.8	3.32	0.41	0.39	0.33	1.38	0.67	0.18	0.26
	c111487f1p04864	-6.35	5.01e-06	0.01	0.5	6.16	6.17	5.76	0.5	6.25	5.72	0.41	0.5	0.77	1.64	0.66	0.45	0.47
	c11148f1p01267	-9.16	5.99e-06	0.01	0.98	7	10.24	3.76	0.37	6.82	5.9	0.06	0.62	0.78	0.85	0.89	0.27	0.36
	c111515f1p04571	-4.84	1.68e-05	0.00294	6.94	20.13	21.67	22.05	3.32	18.99	20.8	2.47	1.76	4.31	7.15	4.45	1.09	2.32
	c111519f1p05039	-5.29	4.06e-06	0.01	1.6	5.5	5.55	5.5	0.54	2.14	5.34	0.55	0.31	0.74	1.72	0.71	0.27	0.65
	c11151f11p51137	-5.41	6.52e-06	0.01	3.7	8.18	7.01	2.69	1.1	11.44	7.92	0.85	0.77	2.39	0.87	1.71	0.59	0.59
	c111532f1p04661	-7.37	3.73e-06	0.01	0.69	5.18	5.67	4.12	0.47	3.28	2.84	0.02	0.25	0.65	1.24	0.43	0.26	0.17
	c111547f1p04069	-5.98	3.65e-06	0.00956	1.82	6.01	3.22	3.03	0.61	5.11	3.44	0.46	0.43	0.57	0.85	0.69	0.46	0.42
	c11154f1p01883	-4.12	1.32e-05	0.00622	7.36	12.23	18.26	13.98	2.04	19.95	20.63	5.65	1.81	3.94	3.6	4.91	0.83	2.2
	c111570f1p04342	-4.98	0.000324	0.00131	274.93	290.73	383.51	280.96	63.64	433.68	445.25	87.26	32.96	54.9	96.19	110.67	23.3	31.39
	c11157f1p0959	-6	1.02e-05	0.00335	2.46	16.19	8.32	12.77	5.11	8.46	10.29	0.93	1.04	1.11	4.23	1.88	0.47	0.96
	c111595f1p04950	-5.36	7.25e-06	0.00378	3.24	8.23	6.17	8.04	1.39	9.01	10.51	0.86	0.75	1.09	2.7	2.01	0.45	0.83
	c111599f1p04379	-13.33	8.71e-06	0.00482	1.26	9.97	13.3	8	1.4	5.38	9.33	0.2	0.29	0.34	1.35	0.94	0.25	0.27
	c111622f1p05053	-4.95	1.21e-05	0.00956	3.41	15.17	10.3	18.79	2.03	16.38	14.94	1.43	1.7	1.72	6.66	2.62	0.88	1.35
	c111632f1p04830	-5.4	1.57e-05	0.01	4.65	23.98	25.11	21.18	2.08	13.05	13.9	1.91	2.22	2.81	5.89	4.07	1	1.36
	c111633f1p04570	-4.49	4.39e-06	0.01	1.41	5.4	5.47	6.75	0.9	4.46	5.25	0.59	0.46	1.23	1.74	1.74	0.32	0.53
	c111666f1p04376	-8.81	9.41e-06	0.00367	2.91	9.17	11.17	6.25	1.39	13.36	10.86	0.88	0.46	1.47	0.81	1.4	0.51	0.73
	c111668f1p05152	-5.08	4.67e-06	0.01	1.33	6.71	5.26	6.16	0.6	4.58	5.83	0.49	0.66	0.77	2.4	1.02	0.09	0.57
	c11166f7p61493	-5.16	7.98e-05	0.00247	35.02	89.65	87.66	109.44	15.91	106.66	87.87	13.58	7	14.01	33.98	20.05	6.36	8.25
	c11167f1p2932	-4.79	1.26e-05	0.01	9.84	10.47	22.49	5.48	1.57	19.4	16.54	5.19	1.34	3.01	2.13	2.37	1.8	2.07
	c111681f1p14568	-8.69	2.44e-05	0.00444	6.28	25.82	18.41	22.14	3.47	35.94	32.56	1.28	1.06	1.55	6.12	3.36	1.17	2.09
	c111683f1p04529	-9	2.77e-06	0.01	1.39	3.97	2.2	4.62	0.31	2.14	1.67	0.3	0.12	0.07	0.68	0.45	0.02	0.18
	c11169f1p21089	-4.67	1.9e-05	0.00438	8.31	27.5	27.95	23.59	3.92	22.71	16.35	4.1	1.98	2.99	8.35	6.56	2.06	1.88
	c1116f9p2872	-4.49	1.03e-05	0.00283	5.4	10.43	16.02	14.63	3.53	9.45	10.96	2.99	0.43	2.43	3.41	4.72	0.26	1.44
	c111705f1p14797	-6.56	4.14e-06	0.00853	1.47	5.74	6.14	4.12	0.52	4.52	2.73	0.62	0.89	0.43	0.48	0.96	0.3	0.16
	c111735f1p14762	-8.41	1.09e-05	0.00156	4.39	13.16	10.87	7.84	3.45	8.89	15.15	1.03	0.54	0.62	2.46	1.67	0.59	0.68
	c111752f1p14949	-5.68	4.29e-06	0.00621	1.87	6.1	4.27	3.81	1.1	5.47	5.1	0.79	0.38	0.63	1.08	0.93	0.48	0.59
	c111765f1p14596	-7.44	3.75e-06	0.00672	0.83	5.15	2.82	3.51	1.05	4.1	5.25	0.34	0.32	0.28	0.97	0.61	0.1	0.43
	c111773f1p11886	-5.62	4.51e-06	0.00614	1.31	5.87	3.96	5.68	0.88	4.79	5.88	0.28	0.53	0.2	2.37	0.84	0.24	0.6
	c111812f1p14658	-5.56	5.46e-06	0.00534	2.86	6.21	7.94	7.43	0.64	5.55	4.05	0.74	0.71	1.09	1.86	1.3	0.19	0.35
	c111835f1p05066	-5.65	3.32e-05	0.00931	17.61	38.51	63.42	45.56	5.04	17.5	29.79	5.09	2.78	5.52	10.38	10.12	0.66	3.93
	c11186f1p0593	-13.14	1.61e-05	0.00738	1.67	14.56	9.24	22.63	3.07	14.55	24.91	0.38	0.21	0.64	3.48	1.3	0.19	0.71
	c111883f1p05008	-5.51	5.58e-06	0.00626	1.8	8.28	4.85	6.55	0.99	6.41	6.67	0.78	0.57	0.96	2.12	1.26	0.24	0.51
	c111886f1p04644	-9.28	2.35e-05	0.000477	11.63	25.63	28.02	16.58	5.85	19.88	28.9	3	1.13	1.97	4	2.12	1.33	1.15
	c111897f1p04795	-6.02	5.11e-06	0.01	1.47	6.88	5.2	6.09	0.47	7.72	4.16	0.6	0.43	0.9	1.81	0.67	0.54	0.36
	c111902f1p04326	-7.77	2.98e-06	0.01	1.27	3.3	4.3	2.26	1.06	1.7	4.14	0.35	0.09	0.46	0.75	0.1	0.1	0.48
	c111909f1p04776	-9.13	5.04e-06	0.00536	1.82	7.18	4.4	2.43	0.9	5.64	6.61	0.3	0.24	1.08	0.66	0.23	0.26	0.4
	c11191f1p01131	-3.77	6.22e-06	0.0091	3.07	9.02	6.18	7.97	1.47	8.7	9.13	1.05	1.07	1.47	4.02	3.27	0.3	0.89
	c111938f1p04407	-5.6	1.51e-05	0.00395	5.07	21.26	18.61	18.45	2.14	16.07	15.95	1.68	1.78	2.72	5.53	2.89	1.11	1.7
	c111961f1p04967	-8.01	6.12e-06	0.0024	2.85	6.59	6.22	3.3	1.48	8.05	7.31	0.84	0.3	0.55	1.2	0.78	0.44	0.36
	c111967f1p34827	-5.69	0.000317	0.00917	103.37	566.65	404.25	352.97	52.65	241.13	337.68	41.31	21.52	66.6	105.38	86.62	15.96	24.34
	c111970f1p05071	-5.39	2.72e-05	0.00246	11.48	27.14	34.01	27.16	5.46	39.79	33.49	4.39	3.06	6.29	6.35	7.42	2.21	3.39
	c111975f1p04543	-7.74	1.52e-05	0.00515	5.3	21.32	12.04	23.7	2.44	11.4	14.95	1	0.98	1.18	4.48	2.67	0.69	0.77
	c111990f1p94719	-3.66	2.76e-05	0.00864	24.95	36.54	50.92	39.08	4.36	28.63	24.83	10.12	2.51	9.36	12.49	18.42	1.68	2.63
	c111993f1p04785	-4.74	9.27e-06	0.00883	2.51	12.91	8.95	10.96	1.91	14.81	10.56	1.16	1.3	2.1	4.31	2	0.89	1.42
	c111f10p3849	-4.77	3e-05	0.00361	21.84	28.93	51.01	35.18	3.31	34.06	31.51	9.71	3.37	9.97	12.64	3.2	1.32	2.95
	c112006f1p04697	-8.61	1.31e-05	0.00297	3.85	13.49	14.21	10.13	2.57	12.69	20.13	1.04	0.64	1	2.78	1.67	0.52	1.3
	c112008f1p33550	-3.76	2.33e-05	0.00634	10.5	32.05	34.43	31.91	5.11	35.01	26.28	5.98	4.52	7.08	13.67	9.09	2.81	3.44
	c11200f1p0787	-13.84	7.09e-06	0.01	1.7	1.93	10.56	7.42	0.52	9.27	8.35	0.83	0.31	0.38	0.62	0.58	0	0.16
	c112015f1p02429	-5.82	6.21e-06	0.00895	1.43	9.85	5.95	6.15	0.99	7.43	7.41	0.37	0.8	0.84	2.45	1.46	0.09	0.72
	c112036f1p24413	-6.18	3.38e-06	0.01	1.92	4.34	2.8	3.44	1.26	3.76	3.55	0.62	0.19	0.54	0.91	0.79	0.25	0.11
	c112040f1p11120	-5.03	1.59e-05	0.01	4.32	23.02	9.37	21.61	4.06	17.84	25.23	1.07	1.49	1.76	7.69	5.38	0.9	2.66
	c112050f1p04447	-5.44	4.23e-06	0.01	0.98	6.35	5.73	3.49	0.81	5.99	3.7	0.72	0.39	0.6	1.42	1.13	0.4	0.3
	c11205f1p01022	-6.13	8.88e-06	0.00337	3.64	11.53	11.25	10.01	1.02	9.78	8.31	1.09	0.45	1.56	3.65	1.16	0.33	0.82
	c112066f1p05224	3.81	-0.00465	0.00244	2248.98	28.34	91.1	30.55	3912.47	297.96	138.95	3873.78	3998.01	3545.12	2859.08	2814.45	4506.16	4082.04
	c112071f1p24770	-5.07	6.58e-06	0.01	2.17	10.61	9.69	6.18	1.16	8.83	4.73	0.79	1.05	1.58	2.19	1.91	0.42	0.61
	c112073f1p05077	-4.7	4.23e-06	0.00898	2.26	5.27	3.92	5.98	0.84	4.49	6.32	0.86	0.43	0.73	1.88	1.29	0.37	0.61
	c112086f1p04372	-23.79	6.51e-06	0.00862	0.93	7.35	8.55	5.01	1.01	2.22	9.75	0.12	0.11	0.4	0.3	0.25	0.03	0.26
	c112094f1p23634	-6.34	6.86e-06	0.00289	3.37	6.04	5.35	8.93	1.79	10.35	6.27	0.72	0.17	1.02	2.39	1.3	0.4	0.64
	c112102f1p04847	-6.6	1.71e-05	0.00917	3.18	15.64	13.51	24.9	2.19	22.9	25.01	1.2	1.71	1.69	5.3	3.79	0.88	1.68
	c112119f1p04767	-8.78	3.19e-06	0.00972	1.09	3.49	4.81	2.89	0.79	2.81	3.12	0.25	0.24	0.32	0.52	0.43	0.16	0.25
	c112140f1p04398	-7.77	3.79e-06	0.00758	1.06	4.86	4.51	5.23	0.39	3.73	2.51	0.19	0.28	0.87	0.6	0.3	0.43	0.2
	c112142f1p04718	-8.85	3.76e-06	0.00557	1.8	4.43	4.33	1.96	0.95	3.64	5.08	0.53	0.21	0.23	0.57	0.4	0.32	0.25
	c11214f1p01702	-5.69	4.14e-06	0.00915	0.65	5.85	5.26	4.29	0.98	3.74	5.28	0.26	0.58	0.44	1.6	0.96	0.26	0.47
	c112150f1p04597	-7.83	4.93e-06	0.00569	1.45	3.76	4.12	4.84	0.87	6.91	7.15	0.53	0.42	0.53	0.92	0.61	0.39	0.31
	c112154f1p04383	-10.08	5.67e-06	0.007	2	6.31	9.78	2.98	1.26	3.51	6.6	0.68	0.16	0.78	0.48	0.6	0.18	0.34
	c112163f1p04808	-5.28	1.15e-05	0.00723	3.5	16.83	10.99	11.03	1.99	17.41	13.66	1.44	2	1.7	4.19	2.35	1.07	1.53
	c112174f1p35022	-4.75	1.14e-05	0.00281	6.83	15.1	10.53	15.68	2.01	12.25	14.17	2.27	1.46	2.16	4.74	3.3	0.69	1.49
	c112179f1p04390	-5.59	4.86e-06	0.00432	2.43	7.23	5.57	4.5	1.03	6.03	4.74	0.61	0.68	0.76	1.98	0.9	0.28	0.43
	c112205f1p04470	-7	9.76e-06	0.00226	3.49	11.7	11.49	10.92	1.79	10.55	9.22	0.98	0.82	1.29	2.55	1.38	0.5	0.94
	c112207f1p04792	-6.69	3.51e-06	0.00925	1.99	6.46	2.99	3.39	0.59	3.02	3.2	0.27	0.35	0.44	0.94	0.73	0.12	0.39
	c112247f1p04468	-5.7	3.24e-06	0.01	0.55	3.52	2.57	5.14	0.63	4.16	3.72	0.22	0.22	0.32	1.41	0.71	0.2	0.48
	c11224f2p21225	-5.18	8.55e-06	0.01	4.04	9.03	17.47	4.02	2.59	8.99	10.23	1.27	0.71	2.9	2.22	2.39	0.36	1.02
	c112260f1p04746	-6.88	3.96e-06	0.01	1.12	6.99	3.39	3.4	0.43	4.63	4	0.41	0.44	0.53	1.07	0.38	0.3	0.34
	c112263f1p14602	-6.39	3.45e-06	0.01	1.35	3.18	4.77	2.7	0.41	4.8	4.71	0.39	0.23	0.4	1.13	0.72	0.22	0.36
	c112267f1p14384	-10.42	4.81e-06	0.00531	1.83	4.5	3.75	3.18	0.5	5.91	7.5	0.36	0.16	0.21	0.89	0.43	0.08	0.49
	c11227f1p0710	-4.29	1.55e-05	0.01	11.96	13.38	30.1	14.88	2.99	11.63	25.45	4.83	2.45	3.77	4.24	8.22	0.51	1.71
	c112281f1p04700	-5.47	4.59e-05	0.00737	19.33	63.69	47.36	39.19	5.53	46.26	80	6.76	6.22	5.83	17	9.43	3.74	6.09
	c112308f1p05010	-6.02	3.66e-06	0.01	1.14	3.63	5.28	2.92	0.52	3.77	5.41	0.34	0.26	0.48	1.37	0.58	0.22	0.5
	c11230f1p0742	-6.98	6.01e-06	0.00252	5.18	4.48	4.71	5.96	0.42	8.24	7.06	1.61	0.45	0.82	1	0.9	0	0.4
	c112339f1p04664	-6.26	6.87e-06	0.00932	3.06	10.13	10.7	8.54	0.73	5.39	4.36	0.85	0.54	0.88	2.86	0.93	0.36	0.44
	c112357f1p04303	-4.78	5.41e-06	0.00877	1.6	6.05	6.92	8.33	0.96	6.51	5.63	0.88	0.55	0.87	2.75	1.59	0.21	0.68
	c11235f1p2671	-8.41	1.66e-05	0.00746	3.5	25.75	20.05	15.7	1.09	14.05	19.15	1.33	1.36	0.68	5.05	1.91	0.17	1.31
	c112364f1p14654	-5.65	1.07e-05	0.00179	3.88	13.61	11.88	11.21	3.43	12.04	11.97	2.14	1.07	1.35	3.71	2.05	0.55	1.17
	c11236f1p0988	-8.19	7.88e-06	0.00242	2.38	9.64	10.58	6.36	2.37	5.51	9.34	0.3	0.17	1.38	2.17	0.99	0	0.63
	c112375f1p14846	-5.88	7.46e-06	0.00955	2.58	10.82	4.72	10.89	1.03	7.28	9.9	0.87	1.05	0.75	2.4	1.38	0.51	1.08
	c112382f1p05189	-7.16	1.18e-05	0.00413	6.61	14.86	5.76	9.96	1.83	16.41	15.79	1.66	0.52	1.12	3.26	0.93	0.73	1.72
	c112383f1p04917	-8.95	6.24e-06	0.01	2.17	9.65	2.54	4.95	0.79	7.97	8.08	0.42	0.45	0.38	1.13	0.79	0.27	0.59
	c112390f1p24650	-6.6	3.35e-06	0.01	1.52	4.67	3.75	4.42	0.36	3.11	3.21	0.43	0.22	0.85	0.94	0.35	0.19	0.2
	c112392f1p04288	-5.45	3.45e-06	0.01	1.84	3.3	2.55	3.72	0.67	4.91	5.61	0.73	0.2	0.46	1.17	0.81	0.29	0.49
	c112397f1p34364	-5.59	4.3e-06	0.00725	1.36	6.4	3.88	4.52	1.32	6.36	3.26	0.65	0.49	0.83	1.14	0.91	0.49	0.35
	c112410f1p54494	-5	6.03e-06	0.00759	2.42	8.68	7.43	9.3	1.39	4.23	6.18	0.91	0.8	1.26	2.54	1.61	0.12	0.68
	c112419f1p24621	-4.63	6.37e-06	0.01	2.35	7.95	8.08	5.21	1.03	11.45	7.2	1.64	0.81	1.72	1.71	1.95	0.6	0.9
	c112447f1p04736	-10.93	7.9e-06	0.00156	3.17	7.12	11	6.53	1.86	5.8	8.88	0.28	0.17	1.38	1.13	0.59	0.09	0.4
	c112458f1p14765	-6.41	8.12e-06	0.0024	2.94	10.28	9.73	8.1	1.72	8	9.21	0.77	0.81	1.06	2.06	1.8	0.45	0.85
	c112469f1p04571	-5.63	1.38e-05	0.00288	5.52	14.88	17	11.82	4.06	12.81	22.46	2.91	1.53	1.21	4.14	4.11	0.83	1.02
	c112470f1p14647	-4.58	6.97e-06	0.00793	2.49	7.68	9.91	11.11	1.91	6.16	8.23	0.69	0.55	1.59	4.65	1.59	0.57	0.72
	c112472f1p04389	-5.65	6.55e-06	0.00638	1.97	8.88	6.47	6.69	1.14	9.8	6.69	0.64	0.62	0.93	2.18	1.79	0.61	0.59
	c11247f1p3871	-8.62	3.79e-05	0.0023	15.22	43.55	61.3	28.32	7.9	32.51	36.63	4.96	2.53	4.43	4.56	4.78	1.67	3.22
	c112504f1p14468	-6.74	3.34e-06	0.01	1.16	4.26	2.56	3.65	0.66	4.75	3.68	0.22	0.21	0.39	0.96	0.83	0.13	0.35
	c112505f1p13692	-4.27	3.86e-06	0.01	1.88	6.01	3.92	6.31	1.27	2.95	4.9	0.67	0.82	0.49	1.61	2.35	0.18	0.26
	c112507f1p04598	-4.86	4e-06	0.01	1.48	4.78	4.56	6.45	0.7	4.98	3.32	0.47	0.39	0.82	2.07	1	0.27	0.39
	c112513f1p04633	-10.83	1.13e-05	0.0024	2.94	14.24	12.04	7.55	2.27	11.66	13.5	0.82	0.71	0.73	1.66	0.91	0.29	0.81
	c112526f1p04600	-5.5	4.71e-06	0.00654	2.67	4.93	4.67	4.3	0.85	8.28	4.29	1.13	0.7	0.74	1.06	0.75	0.49	0.58
	c112534f1p02064	-5.81	7.74e-06	0.00703	1.61	8.78	6.02	10.02	1.79	8.92	11.9	0.65	0.28	1.35	2.47	2.38	0.22	1.09
	c112539f1p04643	-7.61	6.23e-06	0.00407	1.98	8.41	5.8	5.5	0.95	5.81	8.52	0.75	0.33	0.46	1.73	0.83	0.22	0.54
	c112553f1p05266	-5.46	3.56e-06	0.01	1.36	4.13	3.28	4.06	0.65	5.77	4.09	0.7	0.39	0.65	1.16	0.75	0.25	0.38
	c112556f1p04884	-8.5	4.58e-06	0.00361	1.45	6.08	4.93	3.47	1.38	2.88	6.27	0.48	0.33	0.31	0.9	0.71	0.14	0.24
	c112564f1p14818	-8.67	3.86e-06	0.00525	1.49	4.91	5.27	2.56	1.11	3.08	4.43	0.53	0.16	0.38	0.57	0.62	0.16	0.21
	c11256f1p0861	-8.24	6.46e-06	0.0048	1.94	5.5	10.41	3.33	1.97	6.59	8.34	1.16	0.16	0.79	0.32	1.14	0	1.04
	c112575f1p04714	-5.76	3.68e-06	0.00992	1.41	5.21	4.84	4.8	1.1	3.12	3.24	0.27	0.31	0.55	1.48	0.99	0.1	0.42
	c112589f1p04869	-8.02	3.51e-06	0.0074	1.62	3.59	3.37	2.37	1.63	3.24	5.01	0.59	0.2	0.34	0.44	0.52	0.32	0.19
	c11258f7p01103	-6.73	1e-05	0.01	3.81	16.63	11.72	3.07	2.21	10.21	13.85	1.68	0.86	1.85	0.9	2.79	0.61	0.45
	c112607f1p04868	-8.36	7.34e-06	0.00247	2.96	6.84	7.9	4.23	2.18	7.52	11.19	0.67	0.35	0.44	1.77	1.22	0.25	0.42
	c112619f1p04842	-5.96	5.22e-06	0.00348	2.48	5.84	5.65	5.85	1.14	6.11	6.32	0.53	0.34	0.75	1.37	1.66	0.34	0.6
	c112637f1p04596	3.42	-0.000107	0.00219	52.1	4	5.28	6.01	91.79	10.99	8.26	92.01	91.4	77.23	82.02	67	90.21	110.2
	c112648f1p14821	-4.92	7.2e-06	0.00672	3.51	10.1	10.12	5	1.23	10.21	7.57	1.62	1.13	1.69	1.97	2.21	0.49	0.6
	c112651f1p04788	-8.91	8.32e-06	0.00187	3.13	10.29	8.55	5.76	2.34	7.06	10.89	0.72	0.51	0.66	1.83	0.84	0.4	0.43
	c112655f1p04732	-7.1	5.19e-06	0.00393	1.5	6.57	4.48	5.07	0.92	5.77	6.74	0.67	0.43	0.41	1.16	1	0.23	0.47
	c112658f1p04431	-5.03	5.37e-06	0.01	1.99	9.26	5.12	7.03	0.99	5.34	5.42	0.8	0.84	0.88	2.27	1.42	0.25	0.52
	c112659f1p04697	-5.61	5.19e-06	0.00508	2.32	6.79	7.74	4.92	0.75	4.97	5.39	0.79	0.64	0.79	1.27	1.36	0.5	0.51
	c112662f1p14257	-4.72	5.09e-06	0.00902	1.84	7.88	4.58	6.04	1.03	7.04	5.53	0.65	0.82	1.09	2.2	1.37	0.47	0.6
	c112693f1p04723	-6.57	3.98e-06	0.01	2.16	4.88	3.76	4.21	0.4	7.02	1.82	0.8	0.19	0.67	1.01	0.65	0.31	0.08
	c112701f1p04787	-4.29	4.26e-06	0.01	2.28	5.74	5.15	5.5	0.81	4.89	5.94	1.04	0.62	1.01	1.86	1.71	0.29	0.53
	c112710f1p04517	-6.67	4.15e-06	0.00716	2.06	3.44	2.32	4.89	0.91	4.47	7.02	0.61	0.36	0.17	1.32	0.89	0.17	0.25
	c112727f1p04694	-6.05	7.68e-06	0.00422	2.45	10.58	9.03	8.08	1.05	7.87	9.06	0.71	0.49	1.35	2.66	1.26	0.69	0.79
	c112751f1p04543	-6.45	3.74e-06	0.01	1.38	4	3.67	3.26	0.67	6.87	2.99	0.5	0.31	0.44	1.12	0.54	0.3	0.34
	c112754f1p14284	-4.78	6.34e-06	0.01	2.07	10.56	5.79	9.48	1.5	6.55	6.39	0.73	1.01	1.65	2.44	1.8	0.52	0.71
	c112762f1p01765	-6.14	5.02e-06	0.0038	1.75	6.38	6.75	3.45	1.41	5.32	5.82	0.42	0.4	0.51	2	0.87	0.38	0.45
	c112769f1p03256	-5.63	2.51e-05	0.00972	7.63	44.27	23.2	33.11	3.93	27.64	23.07	2.45	2.96	3.83	9.12	6.16	1.83	2.59
	c11276f1p0892	-11.67	4.28e-06	0.00937	0.42	4.97	4.48	4.01	0.53	2.83	6.74	0.08	0.37	0.17	0.74	0.4	0	0.28
	c112784f1p04802	-8.91	6.4e-06	0.00198	2.22	7.56	6.85	4.24	1.84	6	8.07	0.6	0.28	0.47	1.2	0.72	0.4	0.46
	c112831f1p32437	-4.69	1.96e-05	0.00279	10.1	22.53	22.68	22.36	4.48	29.89	21.52	3.05	1.94	4.71	9.52	5.3	1.47	2.47
	c112860f1p04487	-4.83	4.19e-06	0.01	1.19	5.68	3.78	4.17	1	6.78	5.04	0.51	0.69	1.23	0.98	1.59	0.22	0.49
	c112864f1p04689	-5.59	9.47e-06	0.00239	4.9	14.27	9.06	10.4	2.23	9.86	9.48	1.48	1.1	1.33	2.7	2.75	0.5	0.91
	c112879f1p34669	-5.1	1.85e-05	0.00425	7.97	29.26	18.39	24.47	3.63	18.75	20.46	2.65	2.28	3.37	8.04	4.93	0.74	2.09
	c112884f1p04425	-4.73	5.46e-06	0.01	2.19	6.1	8.91	8.46	1.49	6.58	2.89	1.02	0.62	0.75	2.58	1.99	0.41	0.38
	c11289f2p1705	-11.65	1.18e-05	0.01	5.42	16.58	14.78	1.44	1.91	17.44	9.13	0.84	0.76	1.17	0	2.1	0.32	0.53
	c112904f1p05295	-5.68	6.45e-06	0.00859	2.08	10.79	7.06	7.99	1.01	6.12	5.93	0.72	0.7	0.87	2.75	1.31	0.3	0.58
	c112909f1p04740	-13.92	5.74e-06	0.0046	0.93	7.42	4.28	3.95	0.97	6.28	7.67	0.14	0.22	0.09	1.28	0.09	0.16	0.28
	c112915f1p04174	-4.43	3.98e-06	0.01	1.51	5.65	3.94	5.37	0.59	5.42	4.45	0.57	0.49	0.94	2.16	1.14	0.28	0.51
	c112944f1p04575	-5.1	4.77e-06	0.00569	1.69	5.81	5.71	6.22	1.1	6.38	3.9	0.9	0.45	1.08	1.82	1.22	0.3	0.27
	c112951f1p04320	-4.81	1e-05	0.00244	4.35	12.9	9.56	13.07	2.96	12.67	11.15	2.34	1.21	1.82	3.84	2.82	0.65	1.18
	c112956f1p04993	-7.31	4.35e-06	0.00854	0.92	3.59	6.69	5.58	0.57	4.79	3.9	0.37	0.43	0.3	1.09	0.72	0.22	0.42
	c112976f1p05306	-5.46	4.02e-06	0.0082	2.99	3.55	4.05	2.79	0.69	6.24	5.94	1.18	0.27	0.54	0.8	1.21	0.34	0.47
	c112977f1p14848	-6.13	6.88e-06	0.00376	3.25	10.85	7.52	6.11	1.32	7.57	6.03	0.91	0.51	1.33	1.42	1.96	0.35	0.49
	c112985f1p72743	-5.9	7.27e-06	0.00307	3.92	6.38	10.17	5.26	3.05	11.62	4.99	1	0.85	1.41	1.05	2.66	0.29	0.44
	c113006f1p03883	-5.47	6.9e-06	0.00724	2.22	10.92	9.72	6.98	1.31	7.02	6.26	1.34	1.12	1.28	1.36	1.98	0.37	0.68
	c113007f1p04552	-6.94	8.17e-06	0.00365	2.7	8.18	5.55	12.76	2.16	8.76	9.41	0.44	0.44	0.64	2.94	1.36	0.27	1.05
	c113009f1p04877	-10.49	3.12e-06	0.00874	0.96	4.68	3.37	2.65	0.61	2.26	3.46	0.18	0.14	0.12	0.64	0.45	0.05	0.12
	c113031f1p03372	-8.44	1.06e-05	0.00681	1.98	16.97	11.49	9.4	1.86	12.8	8.01	0.51	0.85	0.98	1.83	2	0.76	0.47
	c113073f1p04462	-4.44	8.04e-06	0.00478	3.41	10.42	8.49	11.19	1.56	9.88	10.23	1.48	1.25	1.68	3.78	2.65	0.73	0.88
	c113079f1p04832	-6.71	5.51e-06	0.00378	1.9	6.98	6.41	5.88	0.7	5.07	6.51	0.69	0.49	1.07	1.32	0.71	0.02	0.68
	c113093f1p11923	-6.56	3.55e-06	0.00951	1.93	2.42	3.37	4.86	0.54	5.46	3.72	0.89	0.09	0.39	1.03	0.51	0.23	0.26
	c113096f1p34755	-6.16	1.87e-05	0.00671	5.18	30.32	17.91	12.75	4.73	20.18	26.63	1.52	1.68	2.58	4.9	5.3	0.82	2.3
	c113101f1p14456	-5.99	3.2e-06	0.01	1.75	3.57	4.8	3.5	0.77	3.45	2.64	0.35	0.28	0.75	1	0.66	0.18	0.22
	c113104f1p04765	-5.37	6.62e-06	0.01	1.8	10.24	5.29	7.22	1.01	7.99	9.22	0.77	0.91	0.72	2.94	1.33	0.47	0.82
	c11310f2p2912	-5.66	9.14e-06	0.01	3.66	11.16	3.28	9.68	1.94	15.13	13.41	1.47	0.91	0.99	2.71	2.64	0.74	0.82
	c113115f1p05136	-7.91	2.93e-06	0.01	1.18	4.06	4.66	3.05	0.55	0.91	2.72	0.19	0.18	0.49	0.66	0.47	0.04	0.14
	c113146f1p14435	-11	8.94e-06	0.00247	2.09	10.79	9.21	7.7	2.71	5.45	12.44	0.7	0.33	0.55	1.43	1.06	0.2	0.3
	c11316f1p01551	-4	1.39e-05	0.00804	12.79	17.21	10.56	15.92	2.67	24.8	15.66	3.63	2.32	2.33	10.29	3.76	1.01	1.58
	c113180f1p05128	-7.46	3.16e-06	0.01	1.17	3.98	2.89	2.23	0.64	3.59	4.71	0.29	0.3	0.31	0.67	0.48	0.22	0.32
	c113239f1p14464	-5.55	1.64e-05	0.00297	8.28	26.18	20.59	13.51	3.87	18.11	14.94	2.78	2.07	2.6	4.5	4.39	1.22	1.47
	c113241f1p04613	-8.9	4.69e-06	0.00305	1.8	4.46	5.12	3.53	1.36	4.26	7.17	0.57	0.35	0.26	0.88	0.53	0.19	0.33
	c113247f1p04529	-8.3	4.57e-06	0.00347	2.4	5.92	3.41	3.98	1.22	3.84	6.27	0.59	0.16	0.33	1.04	0.61	0.22	0.3
	c113277f1p04361	-5.15	3.72e-06	0.01	0.94	5.08	4.8	3.55	0.6	3.84	5.24	0.6	0.46	0.54	1.38	0.82	0.33	0.54
	c11327f2p0560	-5.67	0.0001	0.00988	61.08	60.21	155.93	76.56	8.47	175.21	121.65	25.39	9.13	28.67	24.37	15.6	6	7.11
	c113282f1p04842	-4.81	3.56e-06	0.01	1.66	4.44	3.4	4.81	0.74	4.88	4.28	0.51	0.46	0.58	1.66	1.36	0	0.48
	c113290f1p14644	-6.54	4.44e-06	0.00431	1.6	6.88	3.98	4.73	1	3.92	4.77	0.27	0.26	0.6	1.62	0.82	0.14	0.39
	c113296f1p04528	-4.5	4.74e-06	0.00748	2.36	6.69	5.65	4.28	1	7.32	4.58	0.64	0.46	0.89	2.57	1.69	0.48	0.35
	c113299f1p24864	-5.51	6.6e-06	0.00543	3.06	10.49	6.36	5.91	0.95	7.7	7.68	0.8	0.91	0.82	2.46	1.59	0.23	0.84
	c11329f1p1974	-9.18	3.4e-06	0.00778	0.51	4.1	3.59	2.79	0.27	4.64	3.48	0.15	0.26	0.16	0.68	0.74	0	0.13
	c1132f3p01641	-16.66	3.04e-06	0.01	1.43	2.97	0.61	4.97	0.38	3.88	2.06	0.14	0.03	0.28	0.1	0.31	0	0.13
	c113315f1p32535	-5.43	1.95e-05	0.01	2.49	31.04	17.7	29.17	3.41	18.34	26.03	1.56	2.26	2.33	8.64	5.31	1.41	2.11
	c113352f1p04405	-9.15	7.31e-06	0.01	2.45	13.63	4.98	6.87	1	6.15	7.22	0.54	0.77	0.33	1.44	0.79	0.13	0.62
	c113359f1p04867	-17.63	5.42e-06	0.00372	1.11	7.62	5.65	3.58	0.91	3.99	6.28	0.25	0.12	0.18	0.57	0.22	0.09	0.22
	c11335f1p01037	-4.63	7.68e-06	0.00652	4.42	7.06	10.1	8.86	0.85	12.69	8.1	1.58	1.16	2.12	3.51	1.54	0.32	1.01
	c113370f1p04201	-4.27	7.13e-06	0.01	3.77	11.24	9.38	3.2	1.66	11.04	9.46	1.79	1.38	2.07	1.22	3.33	0.67	1.2
	c113379f1p010648	-5.58	5.2e-06	0.01	2.75	3.79	6.39	4.44	0.77	9.64	5.4	0.66	0.37	1.21	1.66	1.06	0.53	0.45
	c113391f1p04652	-11.11	2.72e-06	0.01	1.07	4.31	1.76	2.74	0.41	1.79	3.43	0.15	0.13	0.2	0.33	0.25	0.07	0.27
	c113393f1p04633	-6.13	3.47e-06	0.01	1.71	4.54	3.65	3.04	0.56	5.87	2.66	0.42	0.36	0.86	0.73	0.61	0.34	0.28
	c113422f1p04572	-30.42	7.63e-06	0.0052	1.22	9.95	11.14	5.29	1.19	3.84	7.71	0.07	0.09	0.27	0.31	0.27	0.02	0.3
	c113428f1p14461	-9.31	2.85e-06	0.01	0.67	3.23	4.81	2.21	0.48	2.02	3.52	0.13	0.24	0.27	0.24	0.44	0.1	0.39
	c113456f1p05253	-8.2	1.13e-05	0.00409	3.14	13.86	7.52	11.55	2.45	10.79	17.52	0.99	0.93	0.52	2.43	1.88	0.49	0.92
	c11345f2p0726	-5.28	1.06e-05	0.01	1.88	7.93	21.96	13.81	4.59	11.7	8.16	0.92	0.8	3.44	2.96	4.1	0.46	0.58
	c113463f1p04563	-5.2	7.03e-06	0.00429	3.17	9.45	7.2	8.92	0.92	8.89	7.14	1.51	0.98	0.86	2.78	1.53	0.44	0.69
	c113472f1p0839	-7.15	4.61e-06	0.00972	3.86	2.92	3.59	8.96	1.19	2.39	4.71	0.8	0.25	0.27	1.19	0.86	0.13	0.35
	c113495f1p14963	-8.62	1.5e-05	0.00395	3.37	15.7	13.67	12.82	3.31	15.15	24.65	1.25	1.03	1	3.13	1.91	0.85	1.12
	c11352f1p51622	-6.49	1.03e-05	0.00407	2.66	10.47	14.37	11.05	1.85	9.61	14.4	1.41	0.89	1.07	2.94	1.95	0.75	0.9
	c113552f1p14672	-5.92	5.94e-06	0.00514	1.98	6.67	4.47	7.29	1.21	6.86	8.76	0.67	0.67	0.89	1.64	1.11	0.6	0.71
	c113559f1p04400	-6.31	3.76e-06	0.00825	1.29	5.91	3.93	3.7	0.69	3.82	4.4	0.4	0.43	0.4	0.9	1.04	0.19	0.4
	c113567f1p14660	-5.92	1.87e-05	0.00639	5.77	26.66	16.7	27.78	2.91	15.72	23.9	1.93	2.22	2.18	7.24	3.25	1.11	2.26
	c113572f1p15291	-6.42	7.87e-06	0.00792	2.56	11.97	4.13	9.37	1.79	11.12	7.46	0.59	0.76	0.91	3.19	1.58	0.15	0.36
	c113602f1p14789	-5.91	9.55e-06	0.00873	2.96	11.15	12.96	7.87	1.09	15.62	9.2	1.09	1.11	1.32	3.14	1.63	1.01	1.01
	c113606f1p04625	-8.4	2.44e-05	0.001	9.87	28.59	25.64	19.87	6.58	20.49	32.77	2.85	1.32	2.08	5.18	2.82	1.23	1.65
	c113626f1p14516	-6.36	5.67e-06	0.00406	2.32	7.15	6.06	7.62	0.62	4.99	6.09	0.39	0.57	1.05	1.9	0.79	0.42	0.35
	c113634f1p04478	-11.57	3.35e-06	0.00625	1.64	3.96	2.97	2.06	1.23	2.52	4.47	0.3	0.17	0.2	0.38	0.42	0	0.17
	c113656f1p04339	-5.51	3.52e-06	0.01	1.76	4.47	3.09	4.41	0.93	3.56	4.63	0.41	0.25	0.68	1.16	0.94	0.23	0.48
	c113663f1p04937	-5.84	4.23e-06	0.00818	1.29	6.11	3.05	4.47	0.79	5.64	5.07	0.15	0.6	0.54	1.43	0.87	0.48	0.44
	c113678f1p24443	4.73	-0.00159	0.00302	415	2.14	2.46	1.91	1306.24	22.71	3.21	1183.01	1376.58	933.32	942.74	877.02	1226.23	1752.71
	c113685f1p04902	-4.78	4.61e-06	0.01	1.8	6.44	3.77	5.04	0.67	6.08	6.82	0.7	1.1	0.62	1.61	1.15	0.29	0.93
	c113687f1p14562	-10.77	2.85e-06	0.01	1.11	3.41	1.86	2.95	0.59	3.65	2.74	0.28	0.13	0.17	0.42	0.34	0.05	0.14
	c113705f1p34357	-6.12	8.07e-06	0.01	2.36	7.21	5.26	12.39	1.09	11.05	11.4	0.55	0.64	0.59	3.47	1.66	0.59	0.81
	c113708f1p04715	-5.2	6.23e-06	0.00284	3.79	6.57	8.99	7.83	1.34	5.06	6.5	0.73	0.5	1.45	2.13	1.94	0.23	0.73
	c113715f1p04643	-5.05	1.58e-05	0.00634	4.2	21.68	16.47	22.76	2.66	20.52	17.35	2.59	2.07	3.23	6.42	3.88	0.96	1.79
	c113728f1p24028	-6.25	4.86e-06	0.00419	1.83	6.83	2.83	6.16	1.49	5.87	4.77	0.35	0.34	0.65	1.41	1.27	0.36	0.39
	c113730f1p04376	3.01	-0.000117	0.00545	83.72	2.46	4.2	0.83	122.56	14.93	5.67	108.29	105.21	101.73	101.26	77.65	107	104.45
	c113761f1p14496	-5.98	5.72e-06	0.00514	2.4	8.14	3.55	7.71	1.18	6.59	6.01	0.51	0.5	0.44	2.26	1.28	0.5	0.47
	c113772f1p45112	-7.65	7.01e-06	0.00304	1.94	9.53	7.31	6.58	1.28	7.45	7.5	0.74	0.4	0.53	1.7	1.11	0.35	0.61
	c113781f1p04301	-6.32	5.24e-06	0.00838	2.14	6.3	3.52	5.38	0.85	8.95	5.15	0.8	0.52	0.59	1.43	1.16	0.25	0.37
	c113806f1p04851	-6.1	3.34e-06	0.01	1.1	4.25	3.7	3.47	0.92	3.65	4.13	0.29	0.21	0.41	0.97	1.06	0.18	0.36
	c113815f1p14683	-5.2	5.08e-06	0.00983	2.08	6.85	4.89	8.33	0.89	3.65	6.2	0.62	0.24	1.03	2.32	1.29	0.21	0.61
	c113830f1p04270	-7.14	3.03e-06	0.01	1.02	2.52	3.18	3.45	0.62	3.54	4.38	0.1	0.2	0.53	0.79	0.42	0.31	0.27
	c11383f1p01178	-5.24	5.89e-06	0.00841	2.62	8.26	5.49	10.08	1.15	5.29	5.29	1.01	0.67	1.15	2.87	0.91	0.28	0.39
	c113855f1p04676	-3.8	9.67e-05	0.00958	58.36	164.34	82.03	161.37	23.17	97.98	130.6	25.74	18.41	21.34	51.05	50.92	7.27	14.37
	c113871f1p14637	-5.38	4.28e-06	0.0069	1.95	5.79	4.09	5.65	0.8	4.27	5.62	0.66	0.54	0.6	1.39	1.38	0.29	0.38
	c113877f1p14828	-6.23	5.16e-06	0.01	0.43	7.72	6.98	5.5	0.8	6.7	4	0.12	0.68	0.94	1.57	1.17	0.37	0.32
	c11390f1p01017	-6	3.7e-06	0.00933	1.83	5.02	5.4	2.84	0.82	3.01	4.77	0.51	0.57	0.45	1.06	0.96	0.11	0.29
	c113925f1p05660	-6.71	5.36e-06	0.01	1.51	9.29	6.34	6.91	0.79	4.24	3.69	0.49	0.48	0.85	1.52	1.03	0.18	0.34
	c113947f1p05289	-5.14	6.81e-06	0.01	1.82	12.67	9.23	6.5	1.93	6.5	5.9	0.57	0.74	1.37	2.51	2.52	0.43	0.53
	c11394f1p1923	-9.8	5.06e-06	0.00888	1.75	4.82	4.33	4.8	0.06	8.66	4.6	0	0.36	0.49	0.99	0.22	0.49	0.41
	c113954f1p04643	-5.32	4.24e-06	0.01	2.8	7.12	2.79	4.03	0.29	6.3	3.9	0.82	0.59	0.59	1.6	0.77	0.34	0.41
	c11398f1p01300	-4.9	7.12e-06	0.00716	3.05	8.53	5.75	11.12	1.12	7.97	9.77	1.26	0.89	1.69	3.12	1.58	0.34	0.77
	c113997f1p04841	-9.44	5.77e-06	0.01	1.83	10.54	4.51	3.92	0.63	5.71	6.04	0.6	0.25	0.72	1	0.26	0.23	0.46
	c11399f17p2926	-4.03	9.7e-05	0.003	74.19	85.43	132.41	112.87	17.65	131.66	154.62	33.57	15.02	26.39	35.78	42.75	9.67	12.88
	c11400f3p11000	-7.52	6.6e-06	0.0098	2.6	11.09	7.48	7.32	0.21	6.51	4.39	0.52	0.67	1.36	2.32	0.05	0.22	0.13
	c114013f1p24581	-7.58	1.04e-05	0.00358	2.87	12.49	10.56	10.73	1.61	14.62	9.45	0.67	0.99	1.14	2.65	1.47	0.56	0.74
	c114020f1p04540	-4.75	1.23e-05	0.00617	5.34	18.88	12.4	16.31	1.81	14.73	13.62	2	1.12	1.98	6.35	3.91	0.76	1.37
	c114022f1p24141	-4.59	3.17e-05	0.00583	15.16	49.25	42.74	46.35	5.26	27.82	32.77	6.34	4.77	8.32	12.79	11.51	1.3	2.78
	c114033f1p24474	-5.46	6.6e-06	0.00862	1.61	10.37	6.36	7.61	1.1	7.19	8.22	0.6	0.44	1.2	2.79	1.51	0.43	0.81
	c11403f9p11827	-4.74	2.21e-05	0.00608	7.05	20.03	40.97	24.86	6.13	25.83	26.95	3.59	2.91	6.88	8.69	7.17	1.16	1.6
	c114048f1p04553	-4.82	4.32e-06	0.00754	2.01	3.3	4.48	6.33	1	4.95	6.39	1.11	0.35	0.56	1.32	1.31	0.34	0.91
	c114069f1p05377	-5.27	4.64e-06	0.00554	2.04	6	4.79	5.42	0.87	5.84	5.75	0.69	0.45	0.74	1.92	1.11	0.41	0.51
	c114076f1p24975	3.4	-5.83e-05	0.00187	34.14	0.49	1.9	0.41	47.44	9.28	5.08	45.91	41.69	47.81	58.35	49.31	41.15	51.31
	c11407f1p01636	-4.96	3.82e-06	0.01	1.74	3.82	2.87	6.3	0.76	5.18	4.23	0.52	0.34	0.43	1.64	1.15	0.5	0.43
	c114082f1p14609	-7	3.79e-06	0.00704	1.71	5	2.84	5.22	0.64	4.13	3.78	0.49	0.17	0.3	1.07	0.53	0.29	0.48
	c1140f15p6808	-7.84	5.36e-05	0.00302	29.26	30.44	48.73	76.34	11.34	42.89	84.97	4.33	2	5.9	10.53	11.12	1.94	5.49
	c114104f1p04371	-6.14	7.05e-06	0.00454	2.33	9.54	7.08	7.36	0.98	9.4	7.19	0.7	0.85	0.95	2.21	1.43	0.38	0.61
	c114105f1p04796	-5.49	6.38e-06	0.00604	2.04	9.03	5.79	8.18	0.99	7.63	7.17	0.68	0.71	0.88	2.51	1.42	0.43	0.81
	c114120f1p04714	-6.6	9.17e-06	0.00338	2.47	10.81	10.05	11.94	1.81	8.09	11.32	0.9	0.66	0.98	2.77	1.81	0.52	0.92
	c114149f1p04838	-6.67	3.96e-06	0.0064	1.36	5.26	2.58	4.4	0.89	4.76	5.34	0.35	0.35	0.62	0.77	0.79	0.41	0.4
	c114150f1p04684	-5.43	3.12e-05	0.00952	7.82	50.57	28.94	41.03	6.58	44.03	24.82	3.94	3.04	5.02	11.73	8.99	1.84	2.95
	c114154f1p04628	-5.6	1.85e-05	0.0038	8.24	28.82	20.92	20.05	3.47	22.88	14.82	2.94	2.04	2.69	6.39	4.86	1.18	1.18
	c114164f1p04711	-5.73	3.9e-06	0.00849	2.4	3.96	4.61	3.87	0.55	4.68	5.23	0.66	0.31	0.57	1.26	1.03	0.19	0.4
	c114171f1p02383	-5.89	5.43e-06	0.00455	1.3	7.54	5.66	6.21	1.29	6.2	5.73	0.56	0.51	0.76	1.7	1.1	0.42	0.7
	c114174f1p04411	-12.38	3.25e-06	0.00671	0.95	3.86	3.05	2	1.16	2.59	4.6	0.17	0.1	0.09	0.64	0.26	0.05	0.17
	c11418f2p11243	-6.69	3.32e-06	0.01	3.19	4.28	3.61	4.37	1.05	3.42	0.37	0.48	0.3	0	0.66	1.11	0.27	0.2
	c114192f1p04402	-3.14	9.84e-05	0.00945	84.42	156.91	188.8	107.76	29.05	148.95	95.25	39.4	23.55	36.48	71.31	61.98	14.8	11.18
	c1141f11p1940	-5.77	4.68e-06	0.00806	1.19	4.72	4.25	6.33	0.72	5.94	6.31	0.55	0.44	0.73	1.5	0.71	0.24	0.94
	c114202f1p14225	-7.23	4.72e-06	0.00842	2.05	6.04	3.19	5.32	0.49	7.58	3.52	0.58	0.25	0.93	1.37	0.5	0.05	0.22
	c114215f1p04481	-6.81	3.19e-06	0.01	1.99	4.11	2.9	2.81	0.38	4.49	3.05	0.42	0.21	0.71	0.59	0.46	0.23	0.28
	c114221f1p03698	-5.69	1.72e-05	0.00358	7.19	24.67	19.8	23.33	3.04	15.22	17.14	2.17	1.3	2.54	6.83	4.19	0.88	1.48
	c11423f1p01082	-5.75	4.39e-06	0.00892	1.39	4.35	6.53	2.86	1.61	3.6	7.2	0.28	0.16	0.64	0.93	2.07	0.1	0.63
	c114248f1p04741	-5.3	5.81e-06	0.00523	2.72	7.9	4.84	5.63	1.12	8.83	6.27	1.51	0.56	0.81	2.06	1.21	0.38	0.5
	c114265f1p14833	-5.97	1.02e-05	0.00545	5.13	15.02	16.74	8.3	1.83	9.55	7.77	1.1	1.67	1.73	2.84	2.07	0.58	0.78
	c114283f1p43649	-10.51	4.16e-05	0.01	9.56	68.18	62.9	48.29	5.33	17.3	30.09	1.87	1.5	2.55	8.84	6.59	0.28	1.36
	c114284f1p04362	-4.02	1.7e-05	0.01	8.46	29.16	26.97	17.92	2.79	15.56	23.35	4.18	3.22	4.42	8.39	6.84	1.44	2.42
	c11428f1p1950	-6.07	7.88e-06	0.01	5.74	13.78	6.3	1.79	2.47	11.06	7.63	1.1	0.57	1.04	0.7	3.41	0.47	0.75
	c114290f1p04565	-5	1.17e-05	0.00478	3.49	15.07	15.58	15.45	2.06	13.74	13.01	1.55	1.42	2.13	5.4	2.77	1.03	1.37
	c114295f1p04320	-12.86	6.25e-06	0.00377	1.82	8.27	6.53	3.32	1.84	3.84	8.9	0.38	0.31	0.24	0.92	0.35	0.15	0.33
	c114319f1p02885	-5.84	5.12e-06	0.00852	1.68	7.73	4.72	6.16	0.63	6.79	4.48	0.88	0.82	0.77	1.57	0.92	0.19	0.37
	c114321f1p34508	-7.31	3.96e-06	0.00948	1.13	6.09	3.54	4.79	0.59	2.47	5.02	0.26	0.64	0.57	0.81	0.56	0	0.4
	c114322f1p04449	-7.77	3.21e-05	0.00387	7.35	48.62	34.74	32.82	5.3	30.81	34.65	2.42	2.15	4	7.39	5.77	1.31	1.96
	c114326f1p05721	-6.52	3.35e-06	0.01	1.37	4.59	5.51	2.15	0.66	2.91	3.91	0.33	0.36	0.54	1.03	0.57	0.18	0.23
	c114361f1p04671	-9.43	3.86e-06	0.0048	2.06	3.31	3.19	3.92	1.16	3.29	5.52	0.44	0.11	0.06	1.13	0.3	0.14	0.2
	c114373f1p14705	-7.21	4.29e-06	0.01	1.02	7.18	4.44	5.01	0.19	4	3.98	0.55	0.53	0.51	0.96	0.4	0.26	0.36
	c114423f1p14503	-9.64	4.8e-06	0.00761	1.32	4.66	4.19	3.87	0.97	3.82	8.62	0.3	0.42	0.37	0.79	0.57	0.1	0.31
	c11442f3p1525	-11.6	0.000146	0.00241	34.1	143.96	179.9	151.4	20.57	114.03	193.61	6.92	1.03	10.78	27.62	17.26	0.43	8.19
	c114443f1p04580	-16.19	7.55e-06	0.00318	1.69	9.53	5.86	5.71	0.89	8.15	9.2	0.22	0.13	0.57	0.72	0.26	0.17	0.46
	c114447f1p04526	-6.9	4.61e-06	0.00614	1.29	7.1	4.19	5.41	0.81	4.02	4.92	0.51	0.48	0.43	1.24	0.83	0.15	0.38
	c114469f1p04847	-4.93	8.74e-06	0.00347	3.88	12.06	8.63	12.09	2.09	8.46	10.62	1.38	1.41	1.45	3.22	2.27	0.76	1.23
	c11446f3p0643	-5.3	2.24e-05	0.00532	9.24	16.19	34.87	22.72	3.8	29.11	33.15	4.74	1.48	4.23	7.45	6.54	0.87	2.8
	c114552f1p83857	-3.96	8.75e-06	0.00818	4.87	12.91	5.94	12.28	2.36	10.87	13.88	1.96	2.05	1.61	4.39	4.22	0.17	1.54
	c114558f1p04531	-5.84	3.97e-06	0.00787	1.18	5.19	5.94	3.64	1.08	4.98	2.7	0.49	0.28	0.67	0.91	1.29	0.32	0.27
	c114566f1p04813	-6.75	3.86e-06	0.00691	2.21	6.25	4.24	3.38	0.57	3.61	3.64	0.46	0.32	0.31	1.15	0.64	0.21	0.45
	c114578f1p04163	-6.79	4.14e-06	0.00522	1.55	4	3.84	6.25	0.7	3.35	5.18	0.25	0.2	0.36	1.73	0.72	0.08	0.32
	c114587f1p14843	-6.23	3.69e-06	0.00877	1.87	6	5.42	2.64	0.97	3.4	2.94	0.51	0.57	0.71	1.09	0.67	0.1	0.09
	c114609f1p04644	-6.14	5.51e-06	0.00981	0.87	9.18	6.46	5.13	1.27	5.96	5.4	0.3	0.63	0.84	1.51	1.39	0.33	0.59
	c114655f1p05056	-5.9	3.69e-06	0.01	0.88	5.44	3.35	3.09	0.67	3.6	6	0.25	0.34	0.46	1.18	0.78	0.22	0.66
	c114675f1p04189	-6.02	6.33e-06	0.00447	1.77	8.01	5.57	6.83	1.25	8.24	7.8	0.67	0.62	1.12	2.06	1.32	0.16	0.61
	c114677f1p04441	-6.06	4.19e-06	0.01	0.75	6.56	3.04	5.53	0.76	4.02	5.39	0.32	0.27	0.46	1.46	1.12	0.28	0.39
	c114681f1p04279	-5.52	9.5e-06	0.00723	1.93	13.47	9.87	11.52	1.41	11.04	12.16	1	1.01	1.71	3.87	2.02	0.52	0.99
	c114716f1p14676	-7.01	5.63e-06	0.00302	1.92	5.65	3.92	7.44	1.6	5.59	7.57	0.49	0.16	0.63	1.7	1.15	0.21	0.47
	c114719f1p04815	-5.35	4.76e-06	0.00463	2.65	7.51	5.18	4.81	0.73	4.56	4.93	0.7	0.55	1.26	0.89	1.2	0.35	0.73
	c114732f1p64690	-5.91	5.88e-06	0.00499	2.77	6.47	5.42	6.6	0.26	7.73	7.68	0.84	0.81	1.26	1.99	0.3	0.43	0.62
	c11473f5p1572	-4.81	2.58e-05	0.00593	8.22	23.23	27	35.33	5.73	39.68	36.72	5.72	4.5	3.3	8.08	10.58	1.56	2.85
	c114744f1p04767	-4.67	1.92e-05	0.00713	7.29	25.85	18.37	29.22	3.13	22.39	25.18	2.79	1.83	3.26	10.88	5.56	1.43	2.42
	c114763f1p14309	-10.18	3.28e-06	0.00865	1.11	4.63	2.86	2.69	0.63	5.04	1.5	0.41	0.3	0.05	0.59	0.27	0.13	0.07
	c114764f1p04385	-8.35	3.38e-06	0.00843	0.8	3.76	2.9	3.88	0.85	3.24	4.72	0.35	0.08	0.2	1.02	0.34	0.2	0.22
	c114774f1p14598	-5.28	7.17e-06	0.00476	2.39	10.08	7.56	9.42	1.4	6.99	8.54	0.63	0.85	1.33	3.38	1.79	0.19	0.61
	c114795f1p04684	-5.51	1.61e-05	0.00318	5.58	21.92	19.98	20.37	3.18	17.68	15.95	1.8	1.85	3.02	6.16	3.73	1	1.43
	c114811f1p15095	-6.07	2.15e-05	0.002	9.71	31.27	23.8	23.45	4.74	20.31	22.22	2.58	2.21	3.32	6.21	4.52	1.17	2.32
	c114831f1p05055	-7.96	4.04e-06	0.00699	1.52	5.5	6.04	2.46	0.85	2.57	4.7	0.44	0.19	0.78	0.9	0.33	0.04	0.29
	c114837f1p03827	-6.01	5.57e-06	0.00413	1.78	6.54	5.47	6.48	0.87	6.91	6.56	0.93	0.53	0.85	1.27	1.37	0.29	0.51
	c114840f1p04355	-23.44	2.39e-06	0.01	0.51	2.27	1.25	2.91	0.26	2.48	3.25	0.1	0.04	0.1	0.06	0.14	0.03	0.09
	c114844f1p05216	-17.59	8.72e-06	0.0041	4.1	7.46	16.01	3.77	2.41	5.82	7.82	0.64	0.24	0.23	0.93	0.3	0.24	0.11
	c11484f7p1968	-6.14	9.79e-06	0.00569	2.94	12.35	15.43	7.72	1.67	9.32	12.31	1.46	0.69	2.26	2.22	2.17	0	1.25
	c114852f1p13753	-5.68	3.61e-06	0.01	3.1	3.84	2.53	2.09	0.42	4.46	6.3	0.91	0.42	0.42	0.71	0.56	0.39	0.59
	c114868f1p14487	-6.26	3.37e-06	0.01	0.94	5.34	2.44	2.69	0.58	4.38	4.24	0.18	0.35	0.25	1.38	0.58	0.25	0.29
	c114885f1p04559	-6.75	6.35e-06	0.00288	1.82	6.97	6.57	6.61	1.33	7.12	8.02	0.6	0.47	0.42	1.78	1.37	0.49	0.57
	c114891f1p04464	-5.49	4.67e-06	0.01	4.02	7.93	2	2.8	1.12	6.2	5.53	1.22	0.75	0.4	1.12	1.37	0.12	0.4
	c114936f1p05251	-4.21	7.34e-06	0.00893	4.08	13.09	7.19	10.6	2.06	5.57	8.59	2.16	1.26	1.39	2.58	3.61	0.5	0.67
	c114939f1p05013	-5.36	3.42e-06	0.01	1.41	5.37	2.5	3.54	0.76	5.16	3.55	0.43	0.39	0.38	1.01	1.29	0.36	0.3
	c11493f2p1742	-8.08	6.72e-06	0.002	3.85	8.99	4.05	6.9	1.34	6.29	7.71	0.5	0.62	0.31	1.45	1.74	0	0.23
	c11494f1p11401	-4.66	9.6e-06	0.0079	3.54	14.58	12.47	12.64	1.71	7.5	12.94	1.22	1.72	2.06	3.9	2.75	1.2	1.17
	c114975f16p2889	-6.56	8.7e-06	0.00415	10.73	3.74	12.35	8.42	0.59	10.02	7.8	2.35	0.28	2.13	1.4	0.93	0.63	0.47
	c115068f2p01138	-5.12	8.02e-06	0.00431	4.46	11.48	6.57	8.66	1.01	9.91	10.34	1.18	0.95	1.93	2.32	2.03	0.59	1.25
	c115130f2p11917	-3.7	2.52e-05	0.01	8.46	41.5	37.18	29.61	6.44	31.94	35.5	6.67	6.11	6.24	12.15	14.84	2.1	3.41
	c115228f3p0920	-5.98	2.88e-05	0.00407	10.24	22.18	30.37	39.2	4.82	34.39	44.31	3.97	2.26	6.5	7.91	4.75	2.31	3.32
	c11524f1p01502	-4.79	4.02e-06	0.01	2.54	5.61	3.41	3.02	0.85	6.36	5.43	0.97	0.74	0.88	1.24	1.02	0.15	0.69
	c115270f2p0635	-5.16	5.91e-05	0.00703	31.81	74.41	85.65	54.65	6.73	41.46	102.79	10.79	8.05	15.03	15.37	13.68	1.94	12.14
	c115285f3p2512	-5.54	0.000165	0.00279	74.93	125.96	185.66	185.95	52.02	166.45	287.64	23.95	9.1	23.04	50.49	58.47	6.51	22.97
	c11529f1p5739	-5.26	6.43e-06	0.00604	1.5	9.27	7.4	5.73	2.11	6.09	9.45	1.3	0.11	0.92	1.78	2.29	0.75	0.73
	c11531f1p0867	-9.07	2.84e-06	0.01	1.29	2.81	4.03	2.94	0.66	1.53	3.56	0.34	0.14	0.35	0.29	0.3	0	0.43
	c115329f2p05021	-5.03	1.8e-05	0.00187	7.48	23.9	22.33	12.16	8.8	17.61	25.87	3.3	2.27	4.12	4.08	5.67	1.51	2.53
	c115357f1p0851	-5.57	4.1e-05	0.00369	17.03	52.04	59.12	46.16	6.11	33.4	54.87	5.91	4.58	5.02	15.68	10.17	1.59	5.26
	c11535f1p11511	-4.36	0.000485	0.0059	180.96	594.39	635.45	702.7	73.76	670.39	594.6	96.69	62.82	99.31	246.38	187.17	50.59	49.74
	c115455f4p1792	-6.12	1.46e-05	0.01	6.26	10.36	12.6	17.18	3.82	12.09	29.77	1.97	1	1.43	8.25	1.3	0.14	0.95
	c115521f2p0622	-4.67	5.46e-06	0.01	2.39	7.85	10.43	6.56	1.68	4.06	3.96	1.08	0.4	1.7	1.33	1.57	0.54	1.28
	c115540f2p04600	-6.88	3.58e-06	0.00877	1.8	3.47	4.55	3.36	0.55	5.28	3.26	0.89	0.22	0.46	0.59	0.6	0.34	0.14
	c11556f5p31197	-7.34	2.06e-05	0.00995	6.52	34.84	20.43	26.44	1.61	17.77	17.83	1.74	1.15	2.28	8.78	1.59	0.37	1.19
	c11558f1p1823	-5.2	9.46e-06	0.01	2.71	12.13	17.58	9.72	1.2	10.82	8.71	0.63	1.41	2.3	3.42	1.81	1.09	1.43
	c115604f3p4878	-5.46	1.1e-05	0.00946	5.63	6.29	15.86	16.03	1.18	9.66	17.76	2.03	1.23	1.89	4.41	2.45	0.25	1
	c11560f3p01649	-5.34	6.72e-06	0.00789	2.33	6.59	7.86	9.69	1.17	5.4	10.56	1.35	0.96	1.01	2.71	1.68	0.07	0.38
	c11565f1p0748	-5.61	1.35e-05	0.00443	4.95	16.25	11.96	17.22	2.01	14.69	20.11	1.39	0.94	2.42	5.18	2.94	0.45	2.23
	c11566f2p0788	-5.7	4.55e-06	0.00877	1.1	5.9	5.06	2.37	2.11	7.58	4.4	0.57	0.11	1.15	1.36	1.5	0	0.32
	c115704f1p2711	-4.9	9.29e-06	0.01	10.11	14.98	5.61	12.2	0.37	11.78	6.72	3.67	1.34	0.53	3.49	0.72	1.73	1.12
	c11571f3p01139	-4.39	1.69e-05	0.0038	10.22	17.9	28.45	16.71	3.52	17.26	24.81	4.51	1.75	5.78	6.82	5.05	1.28	1.87
	c115724f2p11073	-7.83	6.11e-06	0.00404	3.68	3.91	6.49	3.48	1.31	7.53	9.73	1.66	0.31	0.35	0.31	1.05	0.31	0.62
	c115747f2p51675	-4.41	7.15e-06	0.01	5.39	5.82	4.76	10.85	1.46	13.23	7.81	1.11	0.94	1.04	4.14	3.06	0.33	0.55
	c115759f5p51142	-4.38	6.9e-05	0.01	31.47	96.54	134.14	103.68	15.38	49.71	59.65	13.63	3.64	23.94	39.62	17.46	4.61	9.21
	c115761f3p21336	-4.45	8.96e-06	0.00742	2.97	12.94	11.57	12.47	2.18	7.26	12.51	2.78	1.55	1.3	3.16	3.15	0.92	1.03
	c115767f3p01639	-6.33	8.8e-06	0.00848	2.04	11.5	12.18	9.13	1.27	6.08	12.98	0.82	0.94	1.85	1.97	1.88	0.55	0.72
	c115778f2p1688	-4	2.45e-05	0.00311	15.05	24.32	33.26	34.03	6.33	31.51	33.11	8.38	4.68	5.95	14.09	9.37	1.49	0.43
	c11577f1p01008	-9	3.43e-06	0.00742	2.21	3.74	2.48	3.38	0.57	2.11	5.66	0.3	0.25	0.08	0.25	0.76	0.11	0.5
	c115809f1p01333	-4.72	2.82e-05	0.00281	22.57	38.58	27.31	40.94	6.52	35.68	19.12	8.26	2.84	3.46	12.65	9.17	2.02	1.98
	c11580f2p21159	-5.67	2.74e-05	0.00137	22.74	35.58	29.53	24.8	4.56	22.69	35.62	5.56	2.42	2.27	8.09	7.89	0.48	4.24
	c115811f2p3856	-5.59	3.45e-05	0.00669	10.42	34.21	50.13	34.98	4.26	54.98	37.72	5.13	4.32	8.76	12.37	5.7	1.96	2.3
	c11589f1p01500	-6.17	3.62e-06	0.01	1.65	3.84	1.99	3.29	0.69	6.55	4.26	0.2	0.58	0.4	1.38	0.79	0.15	0.11
	c115917f1p11787	-32.64	1.03e-05	0.01	0.07	14.9	15.36	4.76	0.87	10.04	8.75	0.04	0.07	0.64	0.23	0.23	0	0.47
	c115983f3p31615	-6	1.36e-05	0.0029	6.83	16.76	18.54	14.22	1.1	12.68	16.41	2.58	1.11	2.67	3.84	1.69	0.76	1.76
	c11599f1p01502	-5.73	9.73e-06	0.00589	2.47	11.53	10.66	12.36	1.37	14.11	9.82	1.01	1.42	1.35	3.24	2.2	0.56	1.1
	c11600f1p0752	-8.27	1.63e-05	0.000787	10.65	15.85	13.2	22.05	3.52	17.41	12.84	1.67	0.77	0.5	5.58	2.45	0.3	0.28
	c116029f1p21940	-6.32	6.69e-06	0.01	1.59	8.11	10.53	7.09	0.67	4.65	9.24	0.57	0.6	1.21	2.38	0.93	0.46	0.47
	c116037f2p01218	-4.48	5.23e-06	0.00487	5.8	5.46	7.37	7.12	1.84	3.27	5.25	1.47	0.75	0.62	1.36	2.32	0.64	0.89
	c116061f1p4728	-7.33	1.94e-05	0.00252	14.64	17.98	11.65	27.11	1.43	24.84	20.01	2.86	0.51	2.08	3.98	1.48	1.85	3.28
	c11607f4p0893	-9.78	3.61e-06	0.01	2.35	2.23	6.69	3.8	0.06	3.27	2.24	0.5	0.19	0.85	0.28	0.11	0	0.19
	c1160f35p7972	-4.48	0.000188	0.00637	131.57	247.39	343.94	100.99	37.27	195.87	262.18	63.65	32.33	54.62	39.99	66.57	13.14	24.22
	c116148f3p11428	-5.86	4.74e-06	0.00524	2	5.44	5.59	7.51	1.35	2.89	4.81	1.04	0.96	0.58	1.22	0.76	0.08	0.41
	c11614f1p01182	-6.12	7.27e-06	0.01	1.46	11.96	6.73	7.88	1.32	9.63	6.49	0.56	1.12	1.34	2.93	0.82	0.38	0.28
	c116170f3p23039	-5.58	1.42e-05	0.00513	4.93	21.51	17.71	17.17	2.38	10.75	17.58	1.66	1.87	2.46	5.08	3.36	0.63	1.43
	c116183f1p01318	-10.34	3.13e-06	0.00886	1.59	5.18	2.26	2.31	0.2	4.01	2.03	0	0.16	0.29	0.37	0.62	0.17	0.09
	c11631f1p01233	-5.75	4.25e-06	0.00631	2.81	3.59	4.03	4.81	1.18	4.19	6.73	1.14	0.34	0.61	1.07	0.96	0.36	0.27
	c116334f1p02880	-5.81	3.02e-05	0.00775	7.97	44.35	23.77	46.85	5.87	29.31	36.04	2.41	3.19	3.16	12.91	7.02	1.87	2.85
	c11634f2p0573	-7.26	1.42e-05	0.00339	3.89	17.03	13.06	12.47	3.27	21.35	15.2	0.78	0.65	1.72	3.75	3.32	0.2	1.46
	c116379f3p21198	-10.6	2.99e-06	0.00982	0.62	3.89	3.33	3.83	1.13	1.33	3.02	0.06	0.24	0.44	0.62	0.21	0	0.03
	c116425f4p5735	-4.46	3.76e-05	0.00487	15.49	48.22	61.69	36.06	10.69	34.5	56.23	6.47	6.44	11.83	10.34	18.78	0.46	4.55
	c11648f1p01437	-4.34	1.02e-05	0.00714	2.91	12.87	13.09	12.1	2.23	13.5	15.22	1.18	0.66	3.14	4.91	3.83	1.39	1.45
	c11650f1p0822	-8.1	6.02e-06	0.01	1.06	4.05	9.71	9.73	1.39	6.31	3.56	0.36	0.1	0.83	1.81	1.06	0	0.25
	c116526f98p111078	-13.75	1.64e-05	0.01	0.8	16.46	7.41	16.41	1.74	26.64	22.09	1.11	0.19	0.84	2.84	0.81	0.21	0.66
	c116531f3p2608	-4.89	6.92e-06	0.00576	3.66	7.29	9.01	5.31	1.45	11.57	7.59	1.59	0.68	0.75	3.12	1.35	0.92	0.96
	c11653f1p0584	-5.1	4.68e-05	0.01	25.68	52.42	23.07	61.47	5.89	66.25	76.8	7.65	5.13	5.97	27.19	7.48	0.96	6.67
	c116595f2p01372	-5.18	8.36e-06	0.01	4.15	7.28	15.64	10.91	1.67	4.65	11.06	1.03	1.18	2.76	2.41	2.02	0.24	1.04
	c116613f2p41929	-13.24	5.95e-06	0.01	0.32	4.14	3.36	10.93	1.76	5.24	7.23	0.04	0	0.27	1.59	0.53	0.06	0
	c11662f1p0704	-6.37	5.06e-06	0.01	2.6	3.1	2.09	4.76	1.97	7.81	8.62	0.31	0.23	0.21	1.39	2.01	0.47	0.23
	c116782f3p1739	-7.52	8.79e-06	0.00412	3.86	6.6	14.85	7.14	2.05	6.66	11.78	0.71	0.45	2.25	1.46	1.11	0.61	0.45
	c116847f4p0770	-4.05	1.45e-05	0.00721	9.66	13.25	29.16	20.11	3.72	14.68	14.81	3.87	2.59	4.52	7.84	5.01	0.73	1.47
	c11691f2p0672	-6.09	7.38e-06	0.00475	3.32	9.24	6.68	9.87	1.16	5.14	10.66	1.11	0.68	0.9	2.58	1.61	0	0.69
	c116934f29p51001	-4.43	0.000144	0.01	48.48	152.09	265.42	195.59	22.63	195.58	142.66	24.37	14.89	44.67	69.42	52.06	10.95	14.38
	c116944f14p21140	-7.32	1.24e-05	0.01	4.98	12.02	18.32	9.52	0.82	21.62	8.55	1.17	0.87	3.64	1.74	1.8	0.49	0.66
	c116f14p81327	-7.24	7.15e-06	0.00843	5.51	2.34	8.65	6.29	1.41	12.93	6.04	0.79	0.66	1.26	1.06	0.74	0.93	0.54
	c117105f9p397169	7.18	-5.76e-05	3.86e-10	9.97	0.65	3.2	0.59	21.63	1.37	0.91	31.94	39.34	46.84	28.01	36.05	42.54	50.64
	c117168f2p1673	-6.26	1.77e-05	0.00495	6.63	11.87	17.79	21.49	3.72	20.15	30.34	1.66	1.36	1.58	5.78	4.58	1.33	1.62
	c117182f5p6712	-3.98	2.25e-05	0.00749	11.49	38.63	42.05	21.98	8.42	21.29	20.02	6.48	3.74	5.74	7.67	6.28	6.45	4.82
	c117191f3p27034	-6.48	3.8e-06	0.01	2.22	3.37	7.16	1.86	0.82	3.57	4.22	0.71	0.29	0.73	0.46	0.92	0.18	0.3
	c117215f4p35874	-3.87	4.18e-05	0.01	19.62	33.2	68.64	67.11	6.19	58.01	61.75	11.14	4.74	18.31	16.29	20.95	3.09	6.72
	c117246f1p126196	5.08	-2.98e-05	0.00017	6.45	0.39	1.29	1.23	17.48	2.27	0.86	20.76	23.83	19.41	12.97	20.74	26.41	28.1
	c117274f2p17823	-6.36	4.28e-05	0.00535	11.28	63.53	47.23	21.27	18.34	38.88	65.28	3.07	2.02	2.94	10.74	16.97	1.22	4.83
	c1172f11p1655	-6.14	7.1e-05	0.00304	31.6	59.61	94.46	65.97	8.75	98.04	96.47	10.12	6.35	10.41	19.19	14.2	5.13	8.7
	c117355f2p16107	-7.19	9.31e-06	0.0055	2.45	10.78	7.65	9.85	3.15	6.05	16.25	0.5	0.55	0.8	2.64	2.21	0.35	0.76
	c11736f2p0761	-4.52	8.1e-06	0.00307	6.64	12.18	11.74	8.45	1.91	6.78	7.15	2.14	1.52	1.68	2.81	3.22	0	0.77
	c117399f2p06048	-11.55	1.05e-05	0.00241	3.46	13.68	12.54	5.15	3.61	6.88	13.34	0.81	0.3	0.3	1.56	1.16	0.31	0.62
	c11739f8p2707	-6.65	5.1e-06	0.00877	2.28	8.47	4.23	6.26	0.59	3.38	5.89	0.53	0.12	0.43	1.64	1.02	0.48	0.47
	c117400f2p0845	-8.89	1.31e-05	0.01	6.45	20.21	10.63	2.82	1.23	19.35	15.96	2.2	1.72	1.25	0.39	2.19	0.27	0.59
	c117412f2p117132	-5.84	1.56e-05	0.00412	5.37	23.82	13.5	19.13	3.16	19.05	14.97	1.5	1.61	2.79	5.1	3.58	0.91	1.45
	c117434f1p38149	-5.2	1.03e-05	0.0045	3.83	14.5	10.73	13.37	1.58	10.56	12.77	1.7	1.58	1.55	3.84	2.03	0.79	1.45
	c117469f2p07094	-7.69	8.17e-06	0.00242	3.61	10.53	6.54	9.06	1.7	10.77	6.16	1.01	0.45	0.78	1.62	1.25	0.47	0.71
	c117488f2p21305	4.39	-6.74e-05	0.00709	30.39	0	2.68	0	43.49	2.75	2.01	38.17	27.01	90.47	27.57	62.03	40	72.09
	c117512f2p05994	-13.4	2.9e-06	0.00893	1.28	3.02	3.32	0.99	1.43	1.44	4.6	0.24	0.12	0.01	0.49	0.13	0.15	0.06
	c117515f2p56249	-5.16	1.37e-05	0.002	6.26	13.98	15.48	18.26	3.89	17.75	14.57	2.39	1.06	1.57	5.83	4.22	0.97	1.43
	c117527f2p05564	-5.26	4.89e-06	0.01	1.49	4.15	6.81	8.68	1.12	6.09	3.57	0.31	0.16	0.94	2.88	1.03	0.32	0.42
	c117540f1p05636	-5.15	0.000207	0.00409	97.36	200.03	243.5	176.1	49.73	361.39	248.09	33.51	14.98	36.21	87.59	56.35	21.14	17.65
	c117546f1p35738	-5.38	6.8e-06	0.00241	3.1	7.16	7.45	8	1.65	9.07	6.95	0.88	0.66	1.12	2.15	2.02	0.54	0.68
	c11754f1p2962	-7.25	8.34e-06	0.00782	2.32	13.37	6.22	10.61	1.25	9.54	7.13	0.23	0.65	0.94	3.1	1.44	0.12	0.48
	c117556f1p02326	-9.01	1.06e-05	0.01	1.49	11.66	9.66	7.14	1.18	15.94	15.28	0.24	1.23	1.75	1.49	1	0.41	0.81
	c117573f1p03076	-6.36	1.18e-05	0.00404	3.59	16.4	11.7	10.25	2	15.16	13.96	0.85	0.95	1.9	3.93	2.33	0.47	1.05
	c117583f1p0511	-8.66	0.000129	0.00726	38.8	97.68	159.16	116.86	39.37	69.73	248.53	4.08	5.37	22.23	21.85	18.41	3.95	13.03
	c117588f1p12355	-6.42	1.47e-05	0.00304	6.17	21.43	16.84	15.28	1.82	16.09	14.17	1.73	1.47	2.01	3.94	2.88	1.04	1.22
	c117604f1p42209	-5.87	8.95e-05	0.00254	45.23	131.53	91.17	73.41	19.85	125.55	84.28	15.15	10.15	15.79	27.76	14.41	8.11	5.99
	c11761f2p21880	-7.25	6.85e-06	0.01	0.79	6.61	8.23	9.05	0.28	7.71	9.14	0.63	0.69	1.29	1.54	0.57	0.42	0.62
	c117622f1p06305	-6.46	5.21e-06	0.00556	1.2	6.26	6.09	6.53	0.71	4.93	6.22	0.43	0.49	0.68	1.76	0.72	0.32	0.54
	c11762f1p01534	-4.4	1.66e-05	0.01	6.39	28.91	11.52	24.02	4.88	23.11	16.17	2.83	3.19	2.37	8.25	5.58	2.28	1.65
	c117640f1p06003	-5.02	7.89e-06	0.00262	4.09	9.06	12.01	7.34	2.03	8.3	8.81	1.14	1.18	1.92	2.62	2.31	0.33	0.78
	c117643f1p23798	-6.27	7.22e-06	0.01	2.15	12.52	7.2	9.69	0.86	5.27	7.36	0.55	0.72	1.07	2.37	1.32	0.41	0.75
	c117661f1p06292	-6.76	3.2e-06	0.01	0.96	5.18	1.98	2.43	0.57	3.72	4.43	0.38	0.31	0.34	0.89	0.64	0.09	0.21
	c117662f1p0929	3.51	-0.0039	0.00409	2389.09	108.65	109.03	121.23	1850.96	453.23	1239.96	3649.85	1849.15	4501.77	4807.14	2729.27	1076.17	3397.98
	c117667f1p01615	-6.18	5.5e-06	0.00425	2.45	5.9	8.02	4.1	1.19	7.64	4.67	0.6	0.41	0.61	1.48	1.21	0.83	0.36
	c117679f1p05018	-7.48	5.41e-06	0.00289	1.7	5.91	5.45	5.75	0.8	6.1	6.33	0.46	0.43	0.5	1.43	0.65	0.31	0.5
	c117680f1p06124	-5.54	3.34e-06	0.01	1.9	3.91	4.48	3.55	0.57	4.17	3.31	0.52	0.39	0.36	1.07	0.85	0.35	0.42
	c117683f1p86566	-7.8	6.78e-06	0.00549	2.7	6.38	4.33	9.06	0.84	6.53	10.48	0.83	0.43	0.47	1.27	1.15	0.43	0.59
	c117687f1p06866	-5.39	4.07e-06	0.00812	1.42	4.52	4.88	4.42	1.08	5.45	5.08	0.3	0.35	0.83	1.42	1.09	0.4	0.59
	c117689f1p01916	-5.21	2.13e-05	0.0051	6.21	27.56	21.62	24.6	3.86	30.39	26.91	2.95	1.43	3.28	9.5	5.63	1.81	2.47
	c117694f1p02124	-4.6	6.4e-06	0.00724	3.01	5.06	8.16	9.87	1.01	8.24	7.99	1.18	0.43	1.16	2.75	2.83	0.44	0.62
	c117713f2p0746	-8.32	1.32e-05	0.00833	2.66	18.44	15.38	8.44	2.72	20.85	9.81	0.3	0.89	1.52	2	2.55	1.2	0.95
	c117736f1p05912	-8.39	7.38e-06	0.01	2.29	5.63	12.08	3.09	1.6	7.2	11.9	0.59	0.52	0.75	1.17	1.03	0.6	0.56
	c117742f1p42059	-6.94	7.48e-05	0.00244	23.82	95.09	92.04	59.05	15.96	99.58	76.65	9.07	4.68	9.45	17.79	14.55	4.02	7.08
	c117750f1p26451	-6.74	1.54e-05	0.00357	4.93	23.05	16.8	14.47	2.51	16.72	16.42	1.41	1.38	2.67	3.76	2.65	0.81	1.4
	c117762f1p06197	3.52	-0.000768	0.00358	429.2	4.77	14.75	3.55	715.53	51.25	19.04	649.57	702.81	610.88	514.18	500.67	741.55	644.47
	c11776f2p0540	-4.29	1.62e-05	0.00413	13.42	23.2	24.72	19.98	2.68	11.47	18.38	6.97	1.91	3.89	6.53	5.56	0.21	1.46
	c117771f1p06064	-4.19	4.19e-06	0.01	2.66	5.96	4.36	6.06	1.33	4.12	5.37	1.07	0.66	1.06	1.77	1.56	0.57	0.44
	c117774f1p11000	-5.03	4.61e-05	0.00722	45.7	56.89	59.52	7.95	10.41	61.98	63.12	17.47	5.12	10.77	2.22	19.41	3.01	2.79
	c117778f1p06571	-6.85	3.5e-06	0.00943	0.87	4.45	2.75	4.51	0.57	4.2	4.39	0.29	0.32	0.27	1.14	0.5	0.27	0.39
	c117795f1p06197	-6.23	7.16e-06	0.00438	2.38	10.18	6.99	6.99	1.03	8.57	8.33	0.91	0.87	1.5	1.89	1.31	0.16	0.49
	c117798f1p05933	-11.64	3.21e-06	0.0075	1.21	3.03	4.45	1.52	0.74	3.25	4.18	0.41	0.1	0.15	0.45	0.2	0.06	0.21
	c11779f7p31490	-4.3	4.14e-06	0.01	2.41	5.66	6.7	5.25	1.5	3.75	3.98	0.25	0.64	1.47	2	1.72	0.38	0.34
	c117807f1p02696	-5.07	4.93e-06	0.00637	2.2	6.41	3.14	6.75	1.08	6.21	6.17	0.66	0.34	0.53	2.67	1.35	0.08	0.67
	c117810f1p15929	-5.05	1.42e-05	0.00993	5.89	20.01	18.59	24.58	2.27	11.09	12.82	1.81	1.42	2.96	7.04	3.86	0.49	1.26
	c117814f1p55779	-5.76	4.87e-06	0.01	0.69	5.3	5.44	5.92	0.89	4.56	8.07	0.14	0.37	0.8	1.62	1.19	0.45	0.79
	c11782f1p0967	-5.65	1.5e-05	0.00717	4.74	16.27	18.56	24.78	3.18	9.61	20.62	1.92	2.4	2.03	6.58	2.07	1.16	1.13
	c117846f1p26757	-5.25	1.16e-05	0.0038	4.64	13.95	11.37	16.62	2.1	12.49	14.88	1.82	1.11	1.66	5.58	2.2	0.81	1.31
	c11787f1p11212	-5.82	4.62e-06	0.01	1.94	8.04	5.75	2.1	0.86	5.91	4.44	0.12	0.51	1.19	0.89	1.65	0.18	0.45
	c117898f1p01611	-5.19	5.24e-05	0.01	13.76	57.52	45.81	69.87	4.53	83.55	75.68	8.04	10.55	6.15	22.22	15.46	2.78	2.34
	c117913f1p45915	-6.05	6.26e-06	0.00373	1.78	8.43	6.57	7.55	1.37	6.53	6.65	0.64	0.59	0.83	2.28	1.21	0.28	0.59
	c117916f1p06840	-6.23	2.01e-05	0.00294	5.94	28.3	22.4	21.21	4.17	24.77	19.72	1.94	2.19	3.18	6.05	3.87	1.38	1.72
	c117921f1p31803	-5.78	4.87e-06	0.00832	1.88	5.76	4.05	4.97	0.87	8.35	4.75	0.77	0.47	0.41	1.39	1.17	0.67	0.43
	c117928f1p05694	-8.05	1.58e-05	0.00502	4	19.53	9.19	17.19	3.28	16.04	24.64	1.46	1.33	0.86	3.48	2.23	0.88	1.41
	c117938f1p02920	-5.61	5.57e-06	0.00932	1.87	9.98	3.94	5.02	1.72	6.67	6.06	0.84	0.47	1.25	1.53	1.22	0.65	0.32
	c117939f1p02205	-5.39	1.08e-05	0.0043	5.06	13.73	9.38	16.85	1.98	9.45	14.06	1.3	0.86	1.42	4.47	3.06	0.51	1.44
	c117959f1p16290	-5.27	6.75e-06	0.00459	1.99	8.88	8.4	8.57	1.39	7.08	7.41	0.8	0.85	1.26	2.86	1.4	0.41	0.71
	c117982f1p12634	-7.52	3.74e-06	0.00671	1.39	5.73	3.92	2.74	0.92	3.23	4.7	0.17	0.3	0.26	0.9	0.79	0.17	0.44
	c118009f1p06726	-6.14	7.13e-06	0.00597	2.03	11.02	6.85	8.06	1.08	7.86	7.59	0.73	0.76	0.92	2.16	1.46	0.4	0.81
	c118028f1p04009	-12.74	5e-06	0.00291	0.9	6.36	6.35	4.71	1.26	3.35	4.59	0.15	0.11	0.28	0.66	0.64	0.08	0.23
	c118032f1p06232	-5.74	8.49e-06	0.0029	3.32	8.27	12.13	6.54	2.6	8.84	12.02	1.57	0.64	0.81	2.49	2.61	0.65	0.58
	c118041f1p02219	-6.56	7.84e-06	0.01	3.02	10.58	5.45	7.52	1.63	5.68	14.36	1.22	0.6	0.56	2.26	1.76	0.28	0.67
	c118057f1p03615	-4.7	5.15e-06	0.00582	2.95	4.29	7.31	5.41	0.86	7.61	5.82	1.07	0.54	1.47	2.22	1.15	0.5	0.35
	c118082f1p06431	-7.31	3.9e-06	0.00622	1.17	4.4	3.85	3.97	0.74	5.26	4.53	0.39	0.35	0.31	0.85	0.64	0.41	0.34
	c118089f1p06665	-10.84	3.2e-05	0.00236	9.99	40.58	32.8	19.76	9.72	22.53	46.68	2.23	1.49	1.48	5.59	3.14	1.33	1.54
	c118090f1p04394	-5.43	2.86e-05	0.00237	12.37	39.73	37.61	31.77	6.08	31.87	27.8	4.17	2.64	5.29	8.89	8.35	2.43	2.71
	c11810f1p2792	-4.76	5.07e-06	0.0077	2.97	7.56	3.78	6.66	0.99	7.39	4.28	1.13	0.84	0.38	1.78	1.56	0.85	0.53
	c118110f1p06366	-8.42	3.2e-06	0.00909	0.68	4.94	3.37	2.54	0.35	3.78	2.82	0.28	0.17	0.3	0.65	0.4	0.11	0.29
	c118124f1p014224	-17.19	5.18e-06	0.00302	1.3	6.95	6.1	2.6	1.83	2.84	6.14	0.34	0.12	0.15	0.45	0.23	0.15	0.18
	c118126f1p06286	-8.74	2.91e-06	0.01	0.9	4.48	3.39	2.86	0.37	1.95	3.34	0.13	0.15	0.28	0.79	0.29	0.05	0.28
	c118131f1p05794	-10.96	2.95e-06	0.01	1.13	2.74	4.64	1.52	1.1	2.67	3.09	0.4	0.05	0.23	0.38	0.24	0.08	0.16
	c118154f1p05809	-4.05	1.52e-05	0.00373	7.6	17.68	24.76	17.35	4.78	16.44	20.47	2.49	2.13	5.05	5.07	9.21	1.31	1.65
	c118157f1p0605	-22.32	8.67e-05	0.00583	16.18	96.8	93.2	130.19	2.5	45.49	90.18	2.09	1.37	6.01	5.61	1.1	0.37	4.71
	c118179f1p02039	-6.93	3.94e-06	0.01	1.22	1.52	4.41	4.93	0.64	5.22	5.86	0.58	0.14	0.41	0.89	0.98	0.27	0.14
	c11817f1p02034	-5.94	2.03e-05	0.00242	9.75	25.53	19.39	26.86	3.08	19.29	25.66	2.16	1.94	2.76	6.83	4.93	1.16	2.02
	c11822f3p41382	-4.55	1.49e-05	0.00495	9.33	23.77	20.59	9.98	3.02	20.12	15.35	4.15	2.17	3.51	5.33	4.61	1.05	1.61
	c118235f1p02219	-5.73	9.37e-06	0.01	4.8	14.58	13.48	6.82	0.66	6.46	13.36	0.8	0.6	2.11	3.76	1.32	0.45	1.45
	c118237f1p06816	-6.09	4.98e-06	0.00455	1.67	6.55	5.92	5.1	1.11	3.75	6.69	0.39	0.43	0.66	1.52	1.03	0.35	0.68
	c118243f1p06014	-8.02	5.5e-06	0.00344	2.25	4.24	5.98	4.27	1.03	6.19	8.24	0.85	0.28	0.48	0.98	0.82	0.28	0.33
	c118260f1p05785	-5.09	3.97e-06	0.0093	3.04	4.9	4.65	4.79	1.18	4.15	3.55	0.93	0.35	0.78	1.7	1.02	0	0.38
	c118265f1p06034	-10.7	1.45e-05	0.00152	6.54	15	17.28	8.02	4.5	10.38	20.42	1.86	0.38	0.79	2.7	0.86	0.54	0.54
	c118295f1p35711	-5.34	5.42e-06	0.01	1.67	6.82	4.88	8.88	0.92	4.83	6.97	0.61	0.56	1.04	2.2	1.43	0.02	0.69
	c118296f1p01123	3.98	-0.000808	0.000417	423.61	5.68	13.75	9.88	465.42	107.3	80.47	464.61	802.3	688.76	676.02	741.71	474.15	554.25
	c118297f1p21519	-4.01	1.76e-05	0.01	19.2	22.72	17.36	19.1	1.64	32.39	14.47	9.58	2.27	2.69	7.98	5.84	1.69	1.6
	c1182f3p11480	-5.46	1.25e-05	0.00862	5.44	17.54	11.8	10.58	1.16	13.65	21.3	0.8	1.29	1.69	4.3	3.85	0.91	2.07
	c118317f1p01440	-7.41	6.68e-06	0.00362	1.2	7.09	7.62	7.32	1.27	7.85	7.6	0.41	0.72	0.84	1.9	0.86	0.31	0.35
	c118327f1p05709	-5.67	9.56e-06	0.00566	2.87	15.31	8.85	10.72	1.9	11.2	10.12	0.93	1.05	1.68	3.19	2.45	0.37	1.09
	c118332f1p21522	-8.06	4.8e-06	0.00506	1.06	3.92	5.56	5.69	0.55	5.31	6.11	0.39	0.49	0.35	0.92	0.47	0.22	0.66
	c118334f1p02952	-4.49	1.9e-05	0.00379	9.23	20.36	23.33	21.57	4.06	30.62	22.61	2.73	2.02	4.8	8.08	7.37	2.21	2.13
	c118340f1p03500	-4.99	1.26e-05	0.00274	6.23	17.22	15.95	14.38	2.14	13.44	14.59	2.34	1.72	3.01	4.58	3.32	0.48	1.39
	c118343f1p06797	-5.89	1.04e-05	0.00222	4.29	11.56	13.63	12.17	2.17	11.46	10.36	1.05	0.84	1.56	3.9	2.25	0.57	0.97
	c118348f1p0768	-11.06	5.38e-06	0.01	0.81	3.47	9.1	6.2	0.54	3.98	6.62	0.29	0.38	0.79	0.65	0.2	0.15	0.33
	c118361f1p13206	-8.22	5.08e-06	0.00507	2.36	7.47	5.75	5.94	0.73	2.28	5.12	0.28	0.29	0.38	1.19	1.11	0.03	0.34
	c118369f1p05899	-5.96	5.05e-06	0.00354	2.33	6.95	4.99	5.45	1.06	3.96	6.53	0.57	0.35	0.76	1.75	1.04	0.3	0.48
	c118375f1p16226	-8.07	4.52e-06	0.01	0.98	8.41	4.09	3.55	1.35	3.37	4.75	0.23	0.47	0.41	1.01	0.77	0.14	0.25
	c11837f1p01295	-5.13	7.07e-06	0.01	1.82	8.91	10.03	7.76	1.29	4.93	12.03	0.63	0.64	1.35	1.98	2.78	0.87	0.87
	c118382f1p16235	-9.05	5.96e-06	0.00364	2.56	6.22	5.83	4.25	0.7	9.11	5.64	0.46	0.16	0.3	1.43	0.77	0.3	0.36
	c118400f1p12953	-5.27	4.62e-06	0.00847	1.97	7.43	5.74	6.05	0.92	3.96	3.65	0.43	0.65	0.9	1.71	1.04	0.19	0.72
	c118403f1p0826	-8.01	1.44e-05	0.00355	4.37	14.6	11.14	13.19	3	17.19	22.37	1.05	0.24	2.14	4.37	1.51	0.13	1.28
	c118420f1p44620	-6.4	6.31e-06	0.00643	1.26	8.16	7.66	7.73	1.06	4.98	8.14	0.35	0.55	0.95	1.83	1.63	0.34	0.44
	c118425f1p05876	-10.58	2.92e-06	0.01	0.5	4.47	3.21	3.23	0.34	1.37	3.28	0.11	0.25	0.64	0.17	0.13	0.04	0.21
	c118426f1p01978	-5.11	1.43e-05	0.00625	4.11	14.59	20.07	17.57	2.21	14.74	22.11	1.34	2.21	3.5	5.57	2.91	1.1	2.05
	c118427f1p13749	-5.39	5.23e-06	0.00501	2.05	5.44	8.24	6.07	1.11	5.67	4.84	0.58	0.49	0.97	2.16	1.12	0.33	0.56
	c118430f1p06072	-6.78	6.88e-06	0.00955	1.77	10.11	4.35	9.16	0.77	7.31	8.62	0.18	0.77	0.59	2.12	1.4	0.52	0.63
	c118442f1p05620	-5.22	4.02e-06	0.00875	2.13	5.87	4.28	4.47	0.82	6.15	2.82	0.74	0.41	0.84	1.33	1.03	0.43	0.29
	c118458f1p15946	-5.96	4.25e-06	0.00792	1.02	5.39	2.93	5.62	1.17	4.08	6.16	0.51	0.13	0.57	1.5	0.95	0.23	0.54
	c118461f1p05892	-8.6	4.29e-06	0.00759	0.87	5.04	5.2	2.44	0.92	3.9	6.55	0.33	0.43	0.32	0.96	0.26	0.23	0.36
	c118467f1p04333	-8.38	3.29e-06	0.00922	1.7	3.2	4.46	2.96	0.73	2.25	4.38	0.39	0.3	0.4	0.61	0.29	0.03	0.33
	c118483f1p02411	-8.76	1.15e-05	0.00226	3.75	10.67	16.35	12.14	1.92	11.58	11.03	0.71	0.69	1.13	2.3	1.81	0.42	0.64
	c118490f1p06026	-4.98	2.1e-05	0.00225	11.6	19.36	29.53	27.77	4.21	25.86	22.56	4.04	1.87	4.76	6.88	7.15	1.84	1.75
	c118494f1p02305	-5.55	1.38e-05	0.0044	3.9	14.84	13.57	15.13	3.33	20.37	18.39	1.61	0.84	1.57	6.93	2.42	1.31	1.46
	c118495f1p04765	-4.9	4.22e-06	0.0095	1.56	5.02	3.98	5.6	0.57	4.63	6.27	0.37	0.4	0.78	2.34	0.92	0.31	0.52
	c118504f1p13977	-5.36	3.5e-06	0.01	1.5	6.08	2.26	4.45	0.89	3.61	4.03	0.52	0.48	0.36	1.37	0.88	0.28	0.36
	c118517f1p32656	-5.24	1.19e-05	0.00772	3.36	16.35	9.76	15.8	1.67	15.7	15.79	1.62	1.38	2.53	4.76	2.65	0.67	1.35
	c118527f1p25960	-4.8	0.000104	0.00868	42.69	171.51	161.08	126.17	16.54	80.28	114.86	15.23	13.77	21.92	43.69	38.56	4.55	10.76
	c118531f1p01795	-5.41	0.000395	0.00313	154.08	542.35	553.43	471.92	70.75	347.7	473.7	51.03	40.07	88.21	138.39	99.64	29	37.06
	c118534f1p36301	-5.41	7.28e-06	0.00978	10.83	8.47	9.53	2.34	0.43	7.4	7.77	0.66	0.22	0.66	2.6	1.9	1.24	1.38
	c118553f1p22342	-5.78	5.66e-06	0.0064	2.22	6.91	4.05	6.68	0.96	6.02	8.82	0.86	0.51	0.49	1.38	1.93	0.14	0.86
	c118554f1p02277	-9.7	3.57e-06	0.00601	1.24	5.59	3.47	2.66	0.95	2.77	3.95	0.16	0.25	0.07	0.72	0.56	0.1	0.27
	c118560f1p06506	-7.99	5.13e-06	0.00721	2.02	7.04	4.52	3.21	0.3	6.12	7.1	0.42	0.4	0.85	0.77	0.28	0.38	0.7
	c118575f1p12389	-6.75	1.56e-05	0.00858	6.05	8.24	21.45	19.03	1.5	24.08	17.17	1.83	0.43	2.05	7.18	1.69	0.47	0.79
	c118585f1p2450	-5.42	5.35e-05	0.000857	40.67	49.68	73.02	52.43	10.63	72.52	51.09	14.2	6.54	10.24	14.67	9.46	6.21	3.25
	c118589f1p16607	-6.08	2.3e-05	0.00368	6.58	32.6	31.24	22.13	4.55	26.74	22.33	2.8	1.77	4.35	7.04	4.74	1.49	1.86
	c118603f1p14729	-7.8	9.38e-06	0.01	3.49	10.84	6.97	5.22	2.27	18.76	8.2	0.87	0.43	0.88	1.7	1.83	0.57	0.88
	c11862f1p01382	-6.87	1.04e-05	0.00779	3.02	17.52	8.6	13.68	2.43	6.68	11.78	1.07	0.93	0.71	2.91	2.1	0.56	0.99
	c118632f1p16983	-7.13	4.56e-06	0.00946	0.99	5.54	3.99	6.26	0.43	6.36	3.82	0.33	0.39	0.51	1.4	0.81	0.13	0.26
	c118656f1p15928	-5.57	7.32e-06	0.00588	3.08	11.5	10.61	6.41	1.74	5.21	8.24	0.98	0.58	1.37	1.61	2.56	0.38	0.93
	c118671f1p06132	-7.24	4.72e-06	0.00407	3.65	3.95	4.03	2.97	0.53	7.4	5.55	1.06	0.17	0.5	1.22	0.31	0.34	0.27
	c118674f1p11710	-3.98	1.37e-05	0.00288	7.24	15.45	20.62	16.17	4.28	18.84	16.33	3.25	1.72	4.02	5.91	7.04	1.32	1.58
	c118675f1p06068	3.81	-0.00212	0.0023	1011.52	7.89	31.13	6.64	1816.16	137.85	66.66	1725.51	1800.71	1628.55	1460.2	1346	1835.46	1925.96
	c118685f1p02199	-5.27	6.93e-06	0.01	1.81	11.41	7.73	7.67	1.31	5.69	9.58	0.51	0.91	0.93	2.56	1.94	0.87	0.86
	c118700f1p16087	-4.12	3.27e-05	0.01	23.81	47.28	40.65	58.18	3.2	42.63	19.99	6.92	5.42	8.31	21.11	9.06	2.57	3.85
	c118702f1p02142	-6.02	1.34e-05	0.00484	8.62	8.23	13.19	7.65	4.01	20.22	22.15	2.45	0.37	1.26	3.6	4	0.73	1.55
	c118708f1p05606	-6.74	6.42e-06	0.00699	1.65	5.29	5.69	7.27	1.01	8.64	9.78	0.32	0.73	0.54	2.02	1.05	0.46	0.72
	c118721f1p16270	-10.16	7.96e-06	0.0034	2.42	10.08	8.5	4.72	1.91	6.25	11.47	0.72	0.3	0.48	1.45	0.71	0.32	0.5
	c118727f1p12665	-5.51	3.88e-06	0.00919	1.39	4.9	2.62	4.97	0.9	3.73	6.06	0.7	0.34	0.62	0.56	1.44	0.29	0.5
	c118732f1p06336	-5.36	4.03e-06	0.00818	2.38	6.69	3.58	4.55	0.71	4.66	3.78	0.55	0.56	0.64	1.59	1.09	0.2	0.29
	c118751f1p01896	-6.73	3.45e-06	0.01	1.5	4.22	5.75	1.86	0.27	4.29	3.02	0.82	0.24	0.65	0.67	0.15	0.58	0
	c118765f1p16022	-6.21	5.6e-06	0.00409	2.16	5.97	4.83	6.73	0.77	6.46	7.63	0.82	0.36	0.37	1.89	1.21	0.33	0.59
	c118772f1p46702	-5.66	1.29e-05	0.00885	4.55	23.26	11.53	14.11	2.41	11.04	15.76	1.75	1.33	2.03	4.13	3.17	0.57	1.62
	c118779f1p21035	-6.51	3.7e-06	0.01	0.12	4.93	3.37	2.63	1.31	5.65	4.54	0.58	0.8	0.15	0.64	0.7	0.32	0.28
	c118783f1p0368	-7.47	2.21e-05	0.00131	10.78	19.89	32.54	18.95	4.82	26.01	21.15	3.03	2.26	2.06	3.15	2.37	3.04	2.05
	c118806f1p02217	-4.37	1.38e-05	0.00556	5.54	19.14	13.07	19.67	2.75	18.98	17.58	2.89	2.4	2.84	6.58	4.41	1.26	1.76
	c11880f1p01305	-5.05	1.15e-05	0.00318	6.31	17.88	11.38	13.97	2.34	10.31	13.6	2.43	1.42	1.67	4.21	3.63	0.43	1.21
	c118842f1p02642	-6.06	6.5e-06	0.00476	2.9	5.28	6.6	11.11	1.32	6.78	6.61	0.73	0.44	0.94	2.44	1.22	0.3	0.63
	c118849f1p01641	-13.76	2.73e-06	0.01	0.68	4.19	2.13	1.76	0.25	3	3.24	0.14	0.08	0.14	0.4	0.13	0	0.23
	c118873f1p05968	-6.66	7.09e-06	0.00433	1.82	8.12	6.06	8.98	1.14	8.54	8.76	0.63	0.64	0.67	1.93	1.52	0.45	0.68
	c118913f1p26820	-5.97	5.59e-06	0.00688	0.71	7.68	5.69	8.03	1.64	5.73	5.45	0.51	0.46	0.89	2.24	1.1	0.18	0.48
	c118922f1p31901	-4.15	8.36e-06	0.01	7.81	9.91	15.73	7.42	1.26	12.51	4.62	3.91	0.76	2.83	3.3	2.3	0.88	0.29
	c118923f1p01021	-6.74	3.61e-05	0.00683	17.48	45.63	20.53	48.49	4.29	57.69	29.36	4.74	2.65	3.93	11.67	5.13	2.41	2.63
	c118947f1p06339	-7.59	8.73e-06	0.00293	3.26	13.23	5.04	8.45	2.71	9.98	9.03	1.05	0.49	0.33	1.83	2.14	0.55	0.44
	c118949f1p02759	-5.43	9.51e-06	0.00632	2.69	10.12	8.13	12.19	2.06	12.66	13.81	0.92	0.54	0.9	4.91	2.59	0.41	1.09
	c118957f1p15904	-5.48	4.32e-06	0.00642	3.19	4.06	4.9	3.66	1.03	6.3	5	0.97	0.44	0.64	1.09	1.1	0.46	0.44
	c118961f1p26154	-5.62	1.53e-05	0.00704	7.77	8.88	20.38	13.46	4.05	28.62	15.71	3.05	0.8	3.07	3.43	4.32	1.14	1.78
	c118965f1p05984	-6.2	2.09e-05	0.00262	6.96	23.23	23.71	15.09	6.6	22.81	33.04	3.22	2.02	1.97	5.97	4.47	1.74	1.8
	c118971f1p05684	3.58	-0.000206	0.0028	108.85	2.55	4.43	1.78	187.13	13.65	6.74	174.58	169.23	165.91	151.02	128.14	184.58	191.9
	c119010f1p06703	-7.71	2.96e-06	0.01	0.84	3.3	2.42	1.75	1.02	4.17	4.3	0.27	0.2	0.26	0.49	0.56	0.21	0.31
	c119019f1p05679	-7	3.11e-06	0.01	1.51	3.44	3.96	2.85	0.38	3.31	3.82	0.25	0.12	0.51	1.14	0.37	0.12	0.24
	c119040f1p02034	-8.48	1.13e-05	0.0038	3	13.6	16.53	11.69	2.01	7.16	12.65	0.85	0.7	0.97	3.11	1.32	0.17	0.75
	c119041f1p02754	-5.42	4.11e-06	0.01	1.53	3.07	6.53	5.2	0.89	5.85	3.17	0.68	0.14	0.83	2.11	0.62	0.16	0.32
	c119060f1p06150	-4.33	1.57e-05	0.00339	6.66	23.19	17.25	20.03	4.41	19.56	18.9	2.81	2.42	3.82	6.82	6.29	1.23	2.02
	c119062f1p12133	-6.17	8.14e-06	0.00288	2.38	10.3	8.19	10.37	2.13	9.66	7.51	0.24	0.58	1.03	2.95	1.78	0.53	1.08
	c119069f1p06345	-6.13	3.2e-06	0.01	1.3	5.54	2.19	4.17	0.68	3.17	3.11	0.56	0.4	0.13	1.06	0.71	0.14	0.28
	c11907f1p01301	-5.04	5.16e-06	0.01	3.18	9.43	7.2	4.09	1.04	3.94	4.88	0.72	1.37	1.03	1.46	1.52	0.54	0.07
	c119090f1p02833	4.14	-9.14e-06	0.00358	4.19	0	0.18	0	6.38	0.7	0.33	6.42	6.8	6.85	5.97	5.71	7.17	9.77
	c119153f1p05842	-6.58	7.24e-06	0.01	2.33	12.54	7.94	7.89	0.9	9.25	3.8	1.11	0.9	0.92	2.21	0.9	0.51	0.22
	c119157f1p05579	-5.43	5.99e-06	0.00691	2.24	8.76	4.34	5.64	1.33	7.54	8.54	1.05	0.7	1.29	1.3	1.34	0.75	0.63
	c119168f1p07486	-5.46	7.85e-06	0.00271	4.48	10.87	6.46	10.52	1.89	6.5	9.32	1	0.85	1.42	2.75	1.89	0.36	0.88
	c119175f1p275156	-5.19	1.11e-05	0.00425	4.61	16.17	8.13	16	2.83	11.78	13.24	0.94	0.93	1.98	3.67	4.35	0.78	1.37
	c119182f2p01591	-14.35	2.95e-06	0.0088	0.94	1.68	4.1	1.72	0.56	3.53	4.09	0.19	0.29	0.05	0.42	0.06	0.07	0.08
	c119201f1p06237	-7.22	3.02e-06	0.01	1.2	4.79	1.45	3.07	0.73	3.43	3.63	0.3	0.27	0.24	0.89	0.45	0.13	0.25
	c119204f1p01821	-5.23	1.23e-05	0.00661	2.75	15.27	10.81	15.3	2.66	16.46	17.97	1.03	1.5	1.85	4.09	4.68	0.81	1.58
	c11921f2p4740	-5.6	4.22e-05	0.00577	14.23	60.85	24.27	50.81	10.14	50.49	61.65	3.32	4.49	8.39	14.64	9.52	4.69	3.57
	c119222f1p05938	-7.27	4.82e-06	0.00344	1.98	5.98	4.45	4.73	1.01	5.78	5.49	0.44	0.04	0.37	1.67	0.84	0.25	0.44
	c119223f1p16181	-6.07	0.000566	0.01	182.25	1088.13	580.5	631.46	92.78	450.94	574.2	71.59	46.25	89.56	185.63	134.86	23.31	42.35
	c119230f1p0861	-8.45	5.33e-06	0.0078	4.93	7.72	3.1	7.82	0.19	2.64	4.59	0.83	0.05	0.38	1.75	0.19	0	0.47
	c119233f1p06987	-5.44	6.21e-06	0.00309	2.41	8.86	6.28	6.89	1.84	5.48	7.7	0.81	0.68	1.16	1.57	1.99	0.3	0.73
	c119236f7p6860	-13.05	3.56e-05	0.00792	9.94	25.02	53.38	35.41	2.12	21.02	56.99	1.56	0.73	3.26	5.58	1.55	0.13	2.83
	c119261f1p15953	-6.12	3.87e-06	0.00762	2.2	3.63	4.34	2.87	1.26	6.69	3.39	0.49	0.32	0.9	0.75	1.01	0.28	0.24
	c119270f1p06315	-5.25	6.05e-06	0.00329	2.13	6.67	7.14	7	1.49	7.33	7.17	0.68	0.7	1.02	1.95	1.62	0.74	0.7
	c119276f1p05512	-8.81	4.59e-06	0.00421	1.14	4.8	4.25	3.29	1.01	5.09	6.86	0.44	0.25	0.3	0.95	0.67	0.08	0.32
	c11927f2p0797	-7.11	9.01e-06	0.0086	4.66	11.41	16.9	6.19	1.77	4.67	9.48	0.93	0.57	2	1.45	1.23	0.56	1
	c119291f1p05873	-5.69	5.17e-06	0.01	1.92	9.01	5.85	6.48	1.14	2.89	5.44	0.44	0.83	0.7	2	1.08	0.15	0.56
	c119295f1p06030	-7.89	2.98e-06	0.01	0.9	3.23	4.7	3.26	0.53	2.81	2.7	0.36	0.25	0.24	0.72	0.45	0.09	0.18
	c11930f2p2798	-5.89	1.64e-05	0.00481	5.11	15.23	21.18	21.03	2.73	23.57	16.26	2.14	1.51	2.55	8.05	2.18	0.42	0.99
	c119315f1p05791	-7.8	4.07e-06	0.00467	2.13	3.2	3.86	2.66	0.62	6.31	5.01	0.45	0.2	0.3	0.74	0.8	0.31	0.25
	c119316f1p03599	-5.52	1.28e-05	0.00348	4.86	16.03	15.04	15.08	2.68	10.23	18.53	1.66	1.16	2.99	4.07	3.28	0.75	1.04
	c11932f9p1973	-7.95	5.12e-06	0.00922	1.65	3.41	5.12	4.89	0.43	8.45	6.4	0.15	0.17	1.17	0.76	0.63	0.11	0.82
	c119371f1p22078	-4.47	2.73e-05	0.00702	15.56	36.51	41.06	38.97	2.21	31.48	25.89	8.99	4.92	5.03	16.32	3.91	1.89	1.85
	c119400f1p05768	-5.76	9.74e-06	0.00288	3.7	12.99	10.6	11.72	1.81	11.14	9.81	1.21	0.88	1.63	3.68	1.74	0.52	1.06
	c119402f1p05177	3.62	-6.9e-05	0.00312	31.7	0.43	1.34	0.23	66.06	5.29	2.65	56.39	60.08	53.96	50.37	42.68	57.64	69
	c119411f1p06076	-5.31	1.1e-05	0.00586	4.17	17.59	6.73	14.51	3.04	11.69	13.38	1.65	1.24	1.57	3.99	2.86	0.73	1.34
	c119414f1p06867	-8.62	1.02e-05	0.00212	3.59	11.73	12.09	4.95	3.37	11	12.82	1.27	0.49	0.98	1.75	1.25	0.63	0.54
	c119422f1p03429	-6.27	3.36e-06	0.01	0.9	4.13	4.07	3.02	0.91	3.21	5.05	0.35	0.38	0.55	0.89	0.49	0.16	0.57
	c119430f1p02798	-5.44	1.42e-05	0.00341	8.06	22.58	19.09	14.79	4.38	11.9	10.48	2.6	0.99	1.13	6.02	5.23	0.29	0.53
	c119433f1p07141	-12.3	4.28e-06	0.00305	1.06	5.99	2.72	3.35	1.38	4.44	5	0.17	0.12	0.14	0.72	0.48	0.16	0.17
	c119440f1p04725	-5.32	5.45e-06	0.00866	1.26	8.26	5.06	7.19	1.12	6.38	5.83	0.35	0.55	0.94	2.24	1.6	0.28	0.65
	c119443f1p0623	-8.46	2.04e-05	0.00454	4.38	27.77	13.62	21.57	4.94	17.71	30.43	1.08	0.2	2.07	5.31	2.39	0.9	2.29
	c119448f1p67062	-3.64	3.63e-05	0.00813	16.51	57.89	52.39	47.86	10.04	46.16	44.65	6.07	5.3	14.17	20.66	23.23	2.41	3.94
	c11944f1p01120	-10.06	4.09e-06	0.00712	0.99	6.51	4.44	4.69	0.65	2.95	2.95	0.13	0.15	0.13	0.74	0.59	0.3	0.26
	c119456f1p04812	-9.48	9.36e-06	0.01	0.03	12.17	12.09	5.86	0.59	11.9	12.27	0.05	0.49	1.47	1.78	0.84	0.31	0.85
	c119462f1p17124	-5.32	8.81e-06	0.00417	3.73	12.81	10.21	10.68	1.2	9.93	8.61	1.32	1.23	1.68	3.49	1.87	0.44	0.72
	c119463f1p05988	-8.2	5.55e-06	0.01	2.48	6.99	3.97	1.65	1.02	7.86	8.6	0.69	0.08	0.22	0.86	1	0.52	0.59
	c119468f1p07041	-5.64	1.01e-05	0.00416	3.85	15.7	9.14	12.7	2.07	10.04	10.7	1.58	1	1.51	3.28	2.25	0.54	1.21
	c11946f2p0763	-5.04	6.29e-06	0.01	3.24	8.12	7.17	5.11	0.95	11.99	4.84	1.65	0.87	0.89	2.38	1.34	0.59	0.49
	c119500f1p31104	-5.17	1.8e-05	0.00366	5.61	22.71	23.5	20.8	3.59	22.4	21.01	1.89	1.85	3.77	7.57	4.89	1.62	1.56
	c119509f1p35000	-5.92	2.02e-05	0.00311	8.35	28.97	17.66	22.01	3.19	24.62	23.53	1.82	1.97	4.74	5.99	3.56	1.75	1.86
	c119515f1p05135	-9.62	1.49e-05	0.0011	8.11	17.57	17.25	8.39	4.88	9.58	19.87	2.27	1.07	0.79	2.36	1.35	0.43	0.63
	c119520f1p0991	-3.99	1.08e-05	0.00536	6.12	13.86	12.07	17.84	2.52	10.72	14.53	3.45	0.96	4.35	5.09	4.3	0.56	0.76
	c119527f1p02484	-7.02	4.98e-06	0.01	2.35	3.43	9.66	6.15	0.43	3.37	5.07	0.32	0.45	0.94	1.21	0.77	0.34	0.31
	c11952f4p101680	-7.1	1.32e-05	0.00211	4.57	19.54	13.66	13.67	4.62	14.09	9.4	1.46	1.31	1.98	2.26	3	0.33	0.85
	c119539f1p27350	-6.08	8.3e-06	0.01	7.94	7.27	6.99	5.58	1.26	16.94	5.92	2.45	0.53	0.89	1.84	1.2	1.02	0.61
	c119557f1p12158	-4.17	1.12e-05	0.00812	7.86	17.35	9.01	15.27	1.52	16.61	11.45	2.89	1.71	2.45	6.93	3.12	0.83	1.01
	c11955f2p0504	-3.04	0.000593	0.01	376.69	811.18	844.49	978.89	142.6	877.1	995.69	191.9	111.76	187.23	474.61	472.36	76.89	138.3
	c119562f1p04736	-5.37	8.4e-06	0.00555	2.99	12.37	8.79	11.95	1.41	8.75	8.16	1.22	0.94	1.38	2.88	2.19	0.7	0.83
	c119564f1p14330	-5.99	5.86e-06	0.00714	2.01	5.99	4.8	5.73	1.03	7.46	9.63	0.49	0.45	0.71	1.95	1.49	0.36	0.66
	c119583f1p16904	-5.23	6.97e-06	0.00306	4.29	7.94	9.79	6.87	0.97	8.82	6.38	1.48	0.61	1.97	1.81	1.51	0.53	0.69
	c11958f1p0999	-5.46	1.15e-05	0.00276	11.18	16.67	8	9.72	1.46	12.92	13.51	3.06	0.92	1.67	3.07	2.32	1.01	1.43
	c119591f1p11419	-5.33	2.61e-05	0.00318	16.17	33.99	36.58	31.93	4.43	33.53	14.92	4.97	3.66	7.16	6.67	6.22	2.05	1.47
	c119608f1p12636	-4.9	8.15e-06	0.00907	1.13	10	9.64	10.38	1.74	9.77	11.85	0.79	0.69	1.32	3.73	2.82	0.64	1.14
	c119610f1p16110	-6.31	6.45e-06	0.00221	3.06	6.52	6.28	7.36	1.15	7.71	7.39	1.05	0.33	0.88	1.88	1.17	0.31	0.65
	c119622f1p35763	-8.42	6.91e-06	0.00627	2.54	10.51	6.67	6.05	0.71	9.37	4.69	0.44	0.6	0.66	1.31	0.93	0.54	0.34
	c119637f1p15589	-7.91	3.65e-06	0.00687	1.31	4.48	2.32	3.98	0.72	4.25	4.89	0.28	0.39	0.34	0.68	0.61	0.2	0.28
	c119675f1p06737	-6.48	1.29e-05	0.00492	4.94	20.22	18.13	13.09	1.95	10.57	11.59	1.29	1.23	2.88	3.07	2.49	0.66	0.82
	c119681f1p06066	-6.39	4.89e-06	0.00705	1.08	6.3	3.6	6.12	1.04	6.83	5.01	0.53	0.54	0.32	1.51	1.06	0.37	0.36
	c11968f1p0699	-5.78	2.19e-05	0.01	6.33	38.07	15.57	26.06	2.51	24.52	27.76	2.96	3.3	2.15	7.98	3.57	1.43	2.97
	c119716f1p15955	-5.7	1.04e-05	0.00294	5.13	12.76	12.5	14.96	1.86	10.93	7.98	1.46	0.79	1.87	3.76	2.12	0.9	0.7
	c119720f1p32389	-4.72	5.31e-06	0.00941	1.81	9.47	5.64	5.77	1.59	6.12	5.13	0.28	0.59	1.46	3.11	1.46	0.09	0.53
	c119749f1p45772	3.95	-0.00535	0.00131	2825.03	25.31	39.58	4.33	4003.21	323.44	184.9	4332.94	4240.41	4345.29	3361.26	3816.12	4460.6	4671.19
	c119750f1p01541	-4.89	3.89e-06	0.01	1.57	4.15	5.33	6.59	1.04	3.99	3.81	0.7	0.19	0.76	2.43	0.82	0.15	0.36
	c11977f1p11845	-5.38	6e-06	0.00524	1.81	8.78	6.49	6.73	1.21	7.13	6.35	0.77	0.56	0.78	2.24	1.59	0.42	0.79
	c119783f1p06738	-5.12	1.11e-05	0.00458	4.24	14.41	8.97	15.06	2.1	13.11	15.16	1.27	1.28	2.18	4.55	2.91	0.59	1.49
	c119785f1p15831	-5.08	1.36e-05	0.00346	5.75	19.36	14.94	16.01	2.32	16.95	14.7	2.04	1.78	2.09	4.61	4.46	1.25	1.49
	c119787f1p25680	-7.01	3.47e-06	0.00982	1.09	5.54	3.43	1.86	0.7	3.88	4.26	0.33	0.18	0.64	0.51	0.66	0.26	0.38
	c119794f1p15758	-9.94	6.21e-06	0.00263	2.54	8.55	4.94	5.59	1.18	4.43	7.94	0.49	0.11	0.46	1.44	0.54	0.1	0.4
	c119815f1p03115	-4.88	8.52e-06	0.00485	2.82	9.33	9.77	11.63	1.76	9.22	12.3	1.31	0.76	1.29	4.12	2.13	0.76	1.28
	c11981f3p1687	-4.45	5.07e-05	0.00508	18.01	61.91	65.27	77.15	10.3	56.81	66.76	11.15	7.85	8.48	22.6	22.19	2.12	5.72
	c119822f1p21787	-6.12	9.44e-06	0.01	1.02	13.01	9.3	13.33	1.71	13.99	7.14	0.65	0.91	0.87	2.54	3.21	0.98	0.55
	c119826f1p1525	-9	1.79e-05	0.00266	3.78	17.75	24.71	15.88	4.47	14.18	24.37	1.42	1.74	3.17	0.79	3.52	0	1.04
	c119843f1p05985	-5.28	3.94e-06	0.00948	1.59	5.13	5.72	4.7	0.59	4.73	3.81	0.69	0.46	1.32	1.33	0.65	0.19	0.33
	c11988f1p11080	-5.36	5.11e-06	0.00923	1.03	7.77	6.44	4.23	1.3	5.27	6.75	1.03	0.34	1.05	1.68	1.71	0	0.31
	c119895f1p01851	-6.96	6.53e-06	0.00981	2.08	6.11	8.36	4.14	0.87	7.04	11.28	0.76	0.27	1.06	1.65	1.08	0.24	0.66
	c119896f1p06292	-6.33	5.39e-06	0.00594	1.13	5.78	7.16	6.93	1	4.59	6.69	0.56	0.39	0.84	1.71	1	0.23	0.54
	c11990f2p0745	-14.64	2.81e-06	0.01	0.67	1.49	4.69	2.28	0.21	2.5	3.41	0	0.11	0.1	0.33	0.14	0.3	0.06
	c119923f1p22338	-5.53	1.51e-05	0.00305	5.59	18.16	16.78	19.12	2.65	20.35	14.9	1.71	2.08	2.65	5.38	3.21	1.14	1.46
	c119968f1p01496	-5.02	1.1e-05	0.00307	5.38	14.38	11.34	14.9	1.74	12.18	12.88	2.04	1.31	1.77	4.81	2.54	0.82	1.2
	c11997f1p11219	-14.71	2.56e-06	0.01	0.81	4.18	2.04	2.93	0.56	1.31	2.34	0.18	0.07	0	0.2	0.34	0	0.17
	c119981f1p06322	-10.5	5.47e-06	0.00249	1.56	5.92	5.59	3.76	1.34	4.93	7.65	0.33	0.25	0.39	0.89	0.45	0.28	0.33
	c119988f1p15824	-8.24	3.86e-06	0.01	0.51	3.5	5.74	4.29	0.13	4.2	4.28	0.18	0.24	0.65	1.05	0.11	0.19	0.33
	c119993f1p13262	3.65	-0.000965	0.00269	500.1	2.21	14.16	1.8	862.64	71.89	33.02	802.2	820.88	732.21	695.81	627.83	814.66	925.9
	c119f17p71274	-4.96	3.05e-05	0.00942	5.93	47.19	37.21	37.92	6.83	41.64	28.19	3.27	3.98	5.94	13.89	11.42	1.49	1.32
	c120011f1p01388	-8.99	1.13e-05	0.00791	2.77	5.3	15.38	11.27	1.73	17	13	0.86	0	0.88	4.21	0.83	0.52	0.1
	c120034f1p06553	-7.57	5.2e-06	0.00372	1.75	6.77	5.33	6.99	0.88	4.62	4.37	0.35	0.38	0.77	1.31	0.78	0.1	0.37
	c120061f1p06095	-6.94	3.99e-06	0.00717	1.38	6.15	3.76	5.13	0.81	2.38	4.31	0.46	0.42	0.62	0.89	0.71	0.07	0.26
	c120064f1p36210	-6.73	4.25e-06	0.0073	1.84	7.18	2.97	3.4	0.83	4.63	4.82	0.66	0.5	0.59	0.93	0.6	0.23	0.3
	c120071f1p35768	-7.92	1.56e-05	0.00247	4.49	18.01	16.44	15.25	2.79	21.1	15.48	0.74	1.19	0.96	4.68	2.51	0.54	1.2
	c120075f1p02033	-6.58	3.48e-06	0.00934	1.06	5.48	4.02	4.2	0.53	2.55	3.19	0.3	0.34	0.38	1	0.96	0.11	0.11
	c120076f1p02376	-6.84	1.01e-05	0.00432	6.23	11.34	15.4	7.62	2.42	3.99	14.46	1.54	0.26	1.22	3.15	1.93	0.05	0.83
	c120081f1p05701	-5.19	3.61e-06	0.01	1.2	4.25	4.27	4.78	0.37	4.83	4.56	0.68	0.57	0.85	1.2	0.85	0.21	0.32
	c12008f1p01400	-4.69	3.51e-06	0.01	1.21	5.86	4.16	3.79	0.65	3.05	4.56	0.47	0.55	1.05	1.5	0.93	0.23	0.23
	c120097f1p66205	-8.31	7.22e-06	0.00359	2.14	11.08	6.43	7.27	1.44	6.75	7.12	0.49	0.34	0.76	1.41	1.26	0.25	0.57
	c120115f1p05873	-6.53	5.19e-06	0.00548	1.34	6.62	4.4	7.07	1.04	4.58	6.63	0.4	0.54	0.59	1.54	1.05	0.32	0.4
	c12011f1p01076	-3.46	1.31e-05	0.01	17.05	13.19	17.62	10.59	2.76	23.97	15.47	4.22	2.32	5.63	2.08	11.8	1.15	1.91
	c120129f1p05673	-4.16	7.39e-06	0.00784	3.06	10.56	7.51	11.31	1.48	9.51	8.48	1.25	1.29	1.89	3.98	2.72	0.63	0.71
	c120136f1p04019	-6.25	1.07e-05	0.00397	3.01	13.76	9.54	14.57	2.24	13.6	9.72	1.02	0.63	1.41	3.88	2.37	0.36	0.97
	c120161f1p22275	-6.2	2.36e-05	0.00416	8.72	37.56	17.77	25.96	4.54	28.12	25.28	3.08	2.3	4.06	5.86	4.57	1.38	2.62
	c120162f1p06588	-5.25	9.52e-06	0.00859	3.83	15.25	7.3	13.66	1.5	11.47	9.33	1.12	1.17	1.13	4.66	2.19	0.61	1
	c120173f1p05960	-8.54	4.12e-06	0.01	1.27	2.79	6.36	3.83	0.51	2.71	6.65	0.54	0.12	0.58	0.75	0.28	0.19	0.37
	c120175f1p06187	-5.8	2.95e-05	0.00221	15.35	43.83	31.4	27.84	5.8	35.42	28.42	5.4	3.06	4.46	7.92	6.39	1.94	3.26
	c120189f1p01901	-6.58	3.98e-06	0.00665	0.91	4.54	4.71	4.64	0.79	4.74	4.69	0.39	0.39	0.44	1.26	0.81	0.29	0.22
	c120193f1p44484	-3.46	3.55e-05	0.01	21.29	58.44	60.83	51.3	7.7	27.97	52.06	11.68	8.34	15.88	18.27	17.01	3.1	6.46
	c1201f21p91561	-4.17	1.5e-05	0.0096	6.27	22.45	27.81	17.87	3.17	13.8	16.98	3.34	2.42	4.46	6.15	6.65	1.29	1.69
	c120222f1p26837	-5.39	5.19e-06	0.01	1.56	9.03	3.42	5.46	1.31	6.6	5.86	0.57	0.47	0.72	1.9	1.5	0.33	0.69
	c120270f1p11559	-6.2	0.01	0.01	3590.12	21827.2	11035.6	15025.6	2458.35	9983.37	8347.52	1286.56	361.74	1461.99	5511.55	2053.12	494.55	492.49
	c120281f1p15938	-6.97	5.75e-06	0.01	1.87	10.88	4.11	5.2	1.23	4.29	7.17	0.41	0.59	0.38	1.42	1.58	0.13	0.47
	c120299f1p12649	-5.52	2.37e-05	0.00239	8.45	30.44	30.28	25.27	5.25	28.87	25.68	3.56	2.82	5.22	7.42	5.41	1.27	2.26
	c12029f1p01049	-6.02	4.59e-06	0.01	0.95	6.13	8.09	5.51	1.24	3.93	2.94	0.07	0.71	1.16	1.26	0.83	0.43	0.32
	c120308f1p07095	-6.29	6.99e-06	0.0038	2.54	9.67	6.12	8.69	1.35	8.52	6.23	0.75	0.59	0.93	2.15	1.36	0.54	0.54
	c120313f1p16348	-4.56	1.27e-05	0.01	7.37	21.46	9.53	20.88	1.7	16	10.07	3.34	2	2.9	5.88	2.46	1.3	1.17
	c120331f1p02474	-5.43	2.74e-05	0.00354	15.97	42.65	37.28	18.55	5.81	24.59	33.61	4.72	2.72	4.28	8.18	9.11	1.36	2.47
	c120335f1p15916	-5.7	1.86e-05	0.00585	5.88	32.09	18.78	21.13	3.91	19.07	18.73	1.83	2.2	3.39	5.7	5.01	1.21	1.66
	c120342f1p06035	-8.82	3.06e-05	0.000516	12.75	38.58	32.95	25.42	9.38	22.88	37.07	3.38	1.89	2.07	6.92	3.03	1.18	1.83
	c120347f1p15879	-7.49	3.29e-06	0.01	1.81	2.34	3.26	3.7	0.84	2.76	5.35	0.25	0.22	0.56	0.83	0.29	0.08	0.46
	c120350f1p02006	-6.79	6.7e-06	0.00247	2.22	7.41	7.46	8.23	1.33	7.36	6.57	0.45	0.41	0.79	2.02	1.05	0.84	0.42
	c120357f1p02054	-6.33	4.16e-06	0.00981	2.08	5.48	2.22	6.73	0.46	4.4	4.11	0.59	0.1	0.34	1.27	1.12	0.55	0.06
	c120365f1p01032	-5.26	7.88e-06	0.00335	2.84	6.99	10.47	8.6	2.04	10.28	9.85	1.07	0.56	1.95	2.53	2.16	0.53	0.92
	c120368f1p01181	-5.8	3.88e-06	0.00841	1.99	5.06	3.8	3.88	0.35	4.5	5.47	0.44	0.07	0.51	1.61	1.22	0.19	0.28
	c12036f4p2793	-6.27	6.39e-06	0.00523	1.71	7.79	6.26	8.54	1.24	5.5	8.61	0.28	0.52	0.57	2.91	1.68	0	0.37
	c120389f1p06817	-5.43	5.67e-06	0.0068	2.55	6.73	7.96	8.12	1.08	3.2	6.73	0.65	0.57	1.04	2.39	1.35	0.05	0.66
	c12038f2p01434	-5.44	1.66e-05	0.00407	7.43	13.46	19.49	23.37	2.4	18.82	23.65	2.44	0.87	2.64	7.21	4.34	0.94	1.52
	c120410f1p12343	-3.36	0.000656	0.00492	434.92	1011.04	1042.34	873	149.48	862.85	865.13	197.63	127.95	239.64	429.68	337.48	89.93	137.33
	c12041f1p2804	-4.68	7.77e-06	0.00754	4.62	13.52	8.07	7.19	1.23	10.42	7.28	1.67	1.4	1.7	3.5	1.21	0.56	1.15
	c120440f1p22050	-5.92	7.83e-06	0.00882	2.17	8.64	7.05	12.43	1.02	7.12	11.22	0.54	0.57	1.25	3.42	1.48	0.38	0.73
	c120453f2p136326	3.9	-0.00313	0.00131	1603.53	5.64	38.54	1.96	2424.19	232.72	101.64	2349.65	2587.75	2449.93	2191.77	2280.17	2689.41	2633.79
	c120459f1p16290	-6.9	3.41e-06	0.00931	1.52	2.01	4.36	4.48	0.21	4.77	3.1	0.24	0.3	0.46	0.76	0.78	0.09	0.33
	c120467f1p22094	-6.22	3.45e-06	0.01	0.53	4.87	2.38	4.79	0.6	3.56	4.53	0.25	0.28	0.8	1.07	0.42	0.21	0.4
	c120470f1p12234	-6.23	7.19e-06	0.00691	1.94	8.24	10.05	9.29	0.75	8.99	5.69	0.57	0.54	1.25	2.33	1.79	0.3	0.43
	c120513f1p03650	-6.33	1.2e-05	0.00372	4.1	17.78	13.65	10.52	2.02	13.31	13.33	1.3	1.4	2.28	3.37	1.98	0.46	1.01
	c120517f1p06322	-8.37	3.33e-06	0.00884	1.37	2.92	3.21	2.84	0.67	3.93	4.94	0.37	0.27	0.22	0.65	0.47	0.11	0.29
	c120525f1p06102	2.09	-0.000139	0.00187	96.72	41.77	35.8	58.78	153.74	41.72	53.65	142.13	150.21	147.97	138.1	126.8	143.59	157.61
	c120527f1p01425	-4.87	0.000344	0.01	126.44	596.42	519.62	475.78	68.78	271.4	281.5	46.47	50.26	63.57	152.6	128.45	16.97	22.3
	c120535f1p06635	-5.66	8.25e-06	0.01	2.72	13.84	9.2	5.96	0.8	8.38	12.16	0.82	1.34	1.56	2.24	1.56	0.52	1.35
	c120545f1p06377	-5.38	7.13e-06	0.00537	3.06	10.61	6.83	7.02	1.41	10.48	6.44	0.93	0.79	1.2	2.37	1.9	0.51	0.83
	c120557f1p32098	-5.24	1.59e-05	0.0052	5.76	15.69	21.08	26.4	2.8	16.28	17.45	1.87	1.56	3.02	6.4	4.9	1.01	1.37
	c120558f1p02311	-4.09	8.29e-06	0.00901	4	14.32	7.94	8.35	2.09	11.78	10.48	1.35	1.45	1.89	5.09	2.88	0.53	1.24
	c120564f1p08058	-6.1	5.11e-06	0.01	1.99	9.42	3.63	6.21	1.08	4.78	4.62	0.7	0.34	0.94	1.34	1.32	0.21	0.35
	c120574f1p01881	-6.43	7.52e-06	0.01	3.03	6.13	11.13	8.85	0.53	12.92	4.5	1.11	0.53	1.17	2.46	0.6	1.19	0.27
	c120577f1p06238	-5.8	7.42e-06	0.00718	2.32	12.04	7.61	7.49	1.04	8.61	7.96	1.03	0.59	1.19	2.41	1.33	0.81	0.77
	c120578f1p05793	-5.78	2.4e-05	0.00439	7.26	36.47	27.71	22.44	4.11	28.22	28.11	2.49	2.65	4.06	8.59	4.21	1.99	2.7
	c120656f1p06248	-11.86	8.88e-06	0.00187	3.05	10.33	8.4	5.51	2.77	6.8	12.54	0.65	0.18	0.34	1.72	0.7	0.2	0.38
	c120658f1p02381	-7.69	7.07e-06	0.00409	2.24	7.63	6.28	6.42	0.85	9.98	8.73	0.91	0.42	0.48	1.7	0.71	0.56	0.7
	c120669f1p03256	-7.65	3.37e-06	0.00943	0.7	3.91	3.13	5.03	0.53	3.77	3.5	0.2	0.24	0.2	1.06	0.49	0.13	0.36
	c120684f1p04414	-5.47	5.01e-06	0.01	2.33	8.04	2.37	5.4	1.07	7.65	5.08	1.05	0.57	0.65	1.44	1.19	0.36	0.59
	c120695f1p16837	-4.65	9.29e-06	0.01	3.8	13.26	5.47	8.18	3.07	16.07	12.7	1.87	1.43	1.41	1.81	4.95	0.88	1.09
	c120723f1p12224	-5.99	3.97e-06	0.01	0.89	4.58	5.6	3.59	0.4	4.06	5.64	0.3	0.34	0.44	1.37	0.88	0.35	0.45
	c120762f1p14770	-5.44	3.92e-06	0.01	0.7	4.53	3.89	6.05	0.66	3.67	5.55	0.3	0.38	0.61	1.67	1.01	0.19	0.46
	c120775f1p16028	-6.17	6.96e-06	0.00226	2.95	6.56	7.83	8.76	1.53	8.12	7.2	0.71	0.49	0.88	2.12	1.65	0.55	0.56
	c120790f1p07685	-8.98	4.08e-06	0.00433	1.19	3.69	3.83	3.94	1.04	4.41	6.02	0.37	0.2	0.37	0.6	0.57	0.22	0.35
	c120840f1p01803	-5.84	5.01e-06	0.00804	1.24	5.04	4.43	6.13	0.78	6.93	6.88	0.04	0.69	0.84	2.02	1	0.19	0.6
	c120842f1p06559	-5.61	3.78e-06	0.01	1.04	5.12	4.88	4.39	0.74	5.1	2.48	0.3	0.28	0.87	1.47	0.91	0.15	0.26
	c120864f1p05963	-16.67	3.85e-06	0.00359	1.77	3.72	4.89	1.27	1.22	3.6	4.61	0.4	0.04	0.08	0.45	0.12	0.07	0.1
	c120866f1p06411	-14.54	3.34e-06	0.00643	0.31	3.64	4.01	2.57	0.28	2.87	4.45	0.13	0.09	0.17	0.44	0.21	0.05	0.16
	c120890f1p16810	3.97	-0.01	0.00186	5199.08	30.83	156.04	23.33	8709.81	707.71	284.23	8628.86	10009.6	8305.91	6921.71	7153.27	9818.8	9199.97
	c120899f1p05831	-5.59	3.45e-06	0.01	1.42	2.74	3.51	4.05	0.67	6.27	3.05	0.54	0.26	0.61	1.38	0.54	0.36	0.19
	c120901f1p44450	-4.98	5.72e-05	0.00237	32.87	66.06	56.47	82.03	9.27	70.31	67.79	12.74	6.37	11.26	21.23	17.12	3.92	4.57
	c12090f1p01657	-5.46	3.17e-05	0.00407	10.89	45.98	35.99	38.15	5.12	39.32	32.04	3.97	2.95	4.5	12.78	7.63	2.92	3.22
	c120911f1p16715	-6.12	3.84e-06	0.00813	1.31	5.35	3.86	5.09	0.53	4.53	3.85	0.32	0.3	0.53	1.53	0.65	0.37	0.31
	c120912f1p61919	-4.98	1.54e-05	0.00937	7.23	10.86	26.25	25.34	2.66	15.37	16.38	2.56	1.19	5.29	7.06	3.43	0.35	1.03
	c120917f1p25848	-9.93	3.39e-06	0.00735	0.74	3.63	5.02	3.98	0.59	2.93	3.08	0.34	0.16	0.41	0.42	0.27	0.15	0.25
	c120922f1p16373	-6.24	2.14e-05	0.00332	9.64	31.79	19.17	24.43	3.12	27.05	19.63	2.56	1.98	3.28	6.71	3.66	1.57	1.85
	c120923f1p14762	-4.2	3.85e-06	0.01	2.18	5.11	4.7	6.13	0.51	5.21	2.74	1.28	0.52	1.09	1.84	1.06	0.28	0.25
	c120940f1p16500	3.75	-0.02	0.00187	12573.5	137.25	369.67	117.61	18813	1581.24	816.73	18859.4	19433.1	18399.5	15378.5	16385.1	20527.9	20177.7
	c120958f1p01768	-5.18	2.28e-05	0.00219	14.56	35.06	26.08	23.23	4.97	24.77	21.33	5.68	3.63	3.68	8.85	4.05	0.83	2.24
	c120963f1p05887	-6.77	8.36e-06	0.00903	2.55	9.87	5.22	7.86	1.44	9.91	14.45	0.85	0.55	0.68	2.09	1.58	0.45	1.37
	c120966f1p05625	-6.44	1.6e-05	0.00409	4.6	15.61	15.61	16.24	2.7	23.61	21.49	1.97	1.49	1.79	3.82	3.49	1.09	1.85
	c120991f1p15860	-6.84	4.31e-06	0.00683	0.93	4.27	4	6.35	0.67	4.85	4.95	0.46	0.53	0.45	1.14	0.53	0.25	0.45
	c120992f2p11640	-11.87	2.92e-06	0.01	0.91	4.19	3.65	3.32	0.19	1.94	2.53	0.14	0.1	0.32	0.6	0.13	0.07	0.05
	c12099f1p01556	-5	2.25e-05	0.00576	8.14	25.57	26.67	36.81	3.56	25.43	25.75	3.31	2.73	2.73	12.14	3.67	2.52	3.26
	c1209f4p0432	-5.38	0.000286	0.00378	150.03	208.99	393.86	357.58	28.83	385.62	378.71	61.7	21.75	63.64	108.94	50.8	18.93	28.12
	c121011f1p14849	-5.53	3.37e-06	0.01	0.78	4.95	3.23	4.4	0.39	4.41	3.13	0.22	0.53	0.6	1.29	0.68	0.23	0.3
	c121014f1p01933	-6.66	4.14e-05	0.00869	10.52	56.74	54.48	60.84	4.65	27.91	44.63	3.34	0.46	9.75	17.32	5.34	1.12	1.66
	c121016f1p02527	-4.76	3.59e-06	0.01	1.57	3.6	5.33	4.71	1.07	4.26	4.11	0.18	0.54	0.66	1.5	1.52	0.35	0.41
	c121019f1p06280	3.72	-0.000405	0.00398	188.51	0.95	6.57	1.01	377.35	21.81	11.74	318.34	357.45	311.76	255.57	243.71	341.43	432.15
	c121067f1p01983	-6.98	4.84e-06	0.01	0.37	5.26	6.54	7.03	0.6	5.03	4.55	0.11	0.4	1.03	1.46	0.62	0.06	0.53
	c121075f1p01547	3.87	-5.92e-06	0.01	2.41	0	0	0	5.54	0.34	0.15	4.87	5.09	5.6	5.79	3.66	5.15	2.47
	c121090f1p05287	-5.7	1.24e-05	0.00445	3.86	18.41	11.76	11.36	2.6	15.5	15.61	1.32	1.7	1.69	3.31	2.7	1.2	1.96
	c121098f1p02731	-5.36	1.47e-05	0.0039	7.83	19.76	11.11	14.66	2.49	21.89	17.84	1.93	1.65	2.29	5.77	3.88	0.7	1.62
	c12109f3p61178	-4.6	1.08e-05	0.01	4.1	16.01	19.06	14.15	1.86	7	12.56	1.77	2.08	2.19	4.77	3.4	0.86	1.17
	c121112f1p02568	-5.03	4.27e-06	0.00762	2.31	5.78	4.85	4.63	1.22	4.81	4.89	0.61	0.53	1.21	1	1.66	0.35	0.31
	c121120f1p11327	-5.31	9.5e-06	0.0092	1.31	16.05	11.28	12.18	4.08	8.92	7.84	0.22	1.38	1.14	3.68	4.49	0	0.69
	c121121f1p05986	-5.67	3.66e-06	0.00959	1.46	5.22	5	2.5	0.67	4.97	3.12	0.49	0.55	0.52	0.97	1.01	0.25	0.25
	c12112f2p21208	-5.34	6.96e-06	0.01	7.47	4.4	11.12	1.97	5.12	3.29	11.2	3.26	0.14	3.19	0.14	1.49	0	0.14
	c121133f1p06319	-7.69	3.38e-06	0.01	1.2	5.91	2.61	2.94	0.42	3.63	3.13	0.43	0.4	0.3	0.68	0.55	0.04	0.19
	c121135f1p34910	-6.71	3.92e-06	0.00674	1.88	3.5	5.34	3.68	1.03	4.62	4.36	0.42	0.16	0.58	1.29	0.54	0.38	0.26
	c121152f1p36498	-4.29	1.59e-05	0.00378	6.87	20.95	16.78	21.43	3.55	22.22	19.67	3.68	2.8	3.95	6.89	5	1.55	2.11
	c121162f1p03887	-4.96	6.02e-06	0.01	1.51	6.26	6.84	10.08	1.08	7.71	6.32	0.48	0.88	1.04	2.7	2.25	0.2	0.47
	c121173f1p11664	-5.13	6.81e-06	0.01	3.86	11.17	6.28	8.36	1.72	2.55	10.49	1.79	0.65	0.32	2.73	2.4	0.13	0.65
	c121188f2p14626	-5.73	6.38e-06	0.01	1.29	10.64	5.28	7.46	0.72	7.93	7.29	0.43	0.95	0.65	2.25	1.54	0.51	0.74
	c121198f1p12261	-4.71	2.48e-05	0.00531	9.48	36.87	24.93	30.23	4.47	35.27	28.24	4.41	3.64	4.19	10.68	8.13	2.08	2.85
	c1211f4p11063	-6.06	9.07e-06	0.00639	4.31	14.82	11.27	11.36	1.27	6.13	7.83	1.12	1.02	1.85	3.27	1.79	0	0.35
	c121205f1p08134	-5.23	3.66e-06	0.01	2.17	6.21	3.97	3.08	1.22	2.17	5.21	0.87	0.37	0.57	1.01	1.24	0.08	0.46
	c121209f1p05777	-6.46	5.05e-06	0.00977	1.4	8.53	4.06	3.95	1.11	5.39	6.5	0.25	0.81	0.85	1.19	0.94	0.29	0.46
	c12120f3p11204	-6.52	8.29e-06	0.00365	2.88	10.33	9.54	10.46	0.87	8.73	8.26	0.56	0.41	1.01	3.3	1.45	0.37	0.73
	c121219f3p1998	-6.93	5.13e-06	0.00364	2.61	6.67	6.5	2.73	1.15	4.53	6.56	0.67	0.25	0.61	1.33	0.98	0.22	0.38
	c121225f1p75571	-4.16	4.43e-06	0.0098	2.89	6.13	5.82	5.19	1.08	5.34	5.25	1.3	0.78	1.15	2.02	1.75	0.18	0.44
	c121228f1p01568	-6.42	5.82e-06	0.00376	1.42	8.07	4.78	5.76	2.06	5.52	7.97	1.19	0.4	0.39	1.48	0.89	0.43	0.78
	c121237f1p01706	-4.61	5.11e-06	0.01	3.12	5.59	2.34	6.08	1.34	8.72	7.04	0.92	0.41	1.24	2.71	1.45	0.33	0.37
	c121260f1p22251	-6.18	2.42e-05	0.0048	8.42	24.54	32.14	33.86	1.9	31.36	21.98	3.08	1.57	4.17	9	4.25	1.44	1.45
	c121263f1p36936	-3.42	6.42e-05	0.01	35.23	76.39	70.39	122.06	21.81	74.37	102.74	14.26	7.08	15.08	42.44	53.58	4.96	9.88
	c121301f1p12744	-4.59	1.28e-05	0.00352	6.88	19.6	12.21	15.22	2.55	14.76	15.7	3.02	2.85	2.1	5.74	2.5	1.31	1.42
	c121314f1p11322	-9.42	4.56e-06	0.00438	1.12	5.2	4.15	5.4	1.06	2.61	6.47	0.34	0.16	0.4	0.94	0.51	0.17	0.25
	c12132f2p61059	-5.49	6.85e-06	0.00833	4.08	5	5.16	12.79	1.32	7.37	8.33	1.4	0.86	1.14	2.1	1.4	0.74	0.39
	c121349f1p06019	-13.58	4.25e-06	0.00904	1.78	7.24	2.81	4.73	0.12	2.69	3.93	0.44	0.04	0.28	0.33	0.38	0.06	0.19
	c121353f1p05990	-5.37	4.93e-05	0.00335	20.63	72	64.33	53.82	8.48	58.77	46.42	7.14	5.3	10.3	18.62	11.07	3.64	4.32
	c121354f1p05962	-8.51	9.35e-06	0.00302	3.03	9.47	8.45	7.68	1.67	10.55	14.03	0.77	0.77	0.63	1.91	1.15	0.37	0.86
	c121360f1p11558	-7.13	3.37e-06	0.00957	2.15	5.13	2.88	2.07	1.07	3.24	3.81	0.43	0.08	0.58	0.42	0.73	0.07	0.54
	c121363f1p25853	-5.79	7.11e-06	0.00399	2.26	10.19	8.43	8.07	1.44	7.47	7.01	0.72	0.78	1.36	2.53	1.31	0.46	0.59
	c121366f1p11709	-4.7	6.41e-06	0.00704	1.89	6.49	6.72	7.47	2.44	11.28	6.81	1.18	0.46	0.66	2.13	3.64	0.52	0.56
	c121381f1p11558	-10.39	4.48e-06	0.01	1.19	3.83	8.29	2.28	1.13	6.21	2.61	0.76	0	0.53	0.48	0.39	0	0.29
	c121382f1p06086	-6.96	5.64e-06	0.0037	1.4	7.4	4.8	6.12	1.82	7.81	4.51	0.62	0.56	0.57	0.97	1.47	0.04	0.65
	c121387f1p0625	-4.93	4.82e-06	0.00707	0.59	6.74	5.59	5.17	3.92	5.32	4.44	0.12	0.13	2.67	0.79	2.55	0.18	0
	c121388f1p06470	-8.4	3.87e-06	0.00536	1.11	4.7	4.39	2.55	1.08	4.75	4.45	0.26	0.33	0.33	0.7	0.65	0.21	0.25
	c1213f7p31228	-5.41	1.16e-05	0.00745	5.75	15.16	6.09	16.61	1.95	15.69	13.98	1.45	0.78	0.99	6.26	1.84	0.36	2.22
	c121405f1p25867	-5.24	7.79e-06	0.01	3.65	10.83	5.68	13.08	0.43	9.72	7.6	1.46	0.82	1.39	3.54	1.21	0.36	0.95
	c121416f1p21174	-6.37	4.36e-06	0.01	1.48	6.05	5.95	6.81	0.62	3.28	2.63	0.25	0.32	0.32	1.83	1.14	0.1	0.25
	c121442f1p02009	-7.17	7.7e-06	0.01	1.62	11.97	7.37	10.54	0.65	9.06	5.6	1.1	0.76	1.03	2.54	0.44	0.38	0.29
	c121447f1p01848	-4.9	5.22e-06	0.00873	1.81	8.17	7.56	5.34	1.1	4.82	5.63	0.93	0.45	1.56	2.1	1.06	0.3	0.64
	c121458f1p56866	-5.47	7.77e-06	0.00391	4.26	12.14	10.31	8.64	1.68	6.62	6.1	1.63	0.73	1.39	2.35	1.91	0.52	0.59
	c121466f1p11092	-6.4	4.62e-06	0.00762	3.63	4.27	5.94	1.56	0.43	6.45	6	0.95	0.27	1.46	0.83	0.75	0	0.15
	c121469f1p16195	-7.82	9.06e-06	0.0072	2.02	11.1	4.83	11.45	1.32	11.28	12.04	0.55	0.96	0.72	2.47	1.15	0.25	0.8
	c121484f1p76038	-6.65	9.74e-06	0.00377	2.85	11.87	12.89	9.97	1.2	11.34	10.03	1.15	0.79	1.68	2.16	1.75	0.54	0.97
	c121507f1p05968	-8.64	5.69e-06	0.00624	1.39	6.77	7.78	3.85	0.93	8.02	4.48	0.39	0.33	0.44	0.93	0.93	0.34	0.48
	c121511f1p04691	-7.82	5.55e-06	0.00619	3.16	3.35	9.02	3.8	1.04	4.41	8.15	0.44	0.22	1.05	0.91	0.67	0.14	0.78
	c121528f1p16136	-6.17	3.8e-06	0.00821	2.1	4.34	4.88	4.02	0.83	3.46	4.46	0.33	0.31	0.52	1.52	0.92	0.11	0.19
	c121546f1p11388	-4.75	7.47e-06	0.00654	9.56	8.32	12.95	7.6	1.5	6.33	3.72	1.61	1.14	2.29	2.39	1.74	0.48	0.88
	c121548f1p06592	-4.66	6.27e-06	0.01	2.78	7.51	3.63	8.66	1.2	10.65	7.78	0.91	0.76	0.88	3.5	1.62	0.83	0.55
	c121550f1p01214	-5.16	1.41e-05	0.00287	4.8	18.47	16.04	16.69	3.27	17.43	16.01	2.52	1.71	2.12	5.45	3.6	0.74	1.83
	c121552f1p06706	-5.17	5.29e-06	0.00743	1.6	7.74	4.99	6.43	0.91	6.34	6.3	0.57	0.52	0.72	2.29	1.01	0.79	0.73
	c121555f1p05783	-10.43	4.19e-06	0.00361	1.09	3.57	5.09	3	0.98	3.72	6	0.39	0.16	0.16	0.67	0.52	0.14	0.22
	c121569f1p02781	-3.93	1.19e-05	0.0038	10.07	5.48	17.37	17.26	4.76	13.99	17.48	4.26	0.92	3.71	4.68	5.83	0.75	1.82
	c121582f1p05786	-10.08	2.78e-06	0.01	0.24	3.52	3.71	1	0.75	2.82	3.65	0.06	0.27	0.24	0.37	0.24	0.21	0.17
	c121596f1p06141	-15.97	3.03e-05	0.00296	8.37	41.5	36.29	13.69	10.19	17.01	39.02	1.68	0.55	0.77	4.01	1.19	1.06	1.15
	c121601f1p25706	-6.22	6.29e-06	0.00277	2.6	7.49	7.68	8.01	1.38	6.61	4.96	1.04	0.61	0.73	1.68	1.25	0.27	0.64
	c121602f1p35736	-6.75	5.31e-06	0.00411	1.49	6.49	5.65	4.98	1.35	4.33	7.81	0.44	0.33	0.26	1.33	1.5	0.29	0.61
	c121605f1p42945	-6.75	8.17e-05	0.00769	39.11	88.12	50.69	96.5	6.71	86.44	141.62	10.19	4.28	6.13	35.85	4.66	2.84	11.52
	c121610f1p02843	-7.93	2.06e-05	0.0045	6.8	20.9	35.62	17.11	2.14	21.55	20.62	2.85	1.05	2.64	3.49	4.16	0.59	0.94
	c12162f2p1989	-4.04	7.69e-06	0.00347	5.55	10.38	9.64	8.31	2.33	11.9	6.11	2.88	0.8	2.93	3.03	2.35	0.91	0.51
	c121659f1p05554	-6.78	5.75e-06	0.0082	0.71	5.75	7.85	7.82	0.78	5.61	6.71	0.35	0.33	0.96	2.01	0.76	0.3	0.49
	c121686f2p13621	-5.6	1.45e-05	0.01	2.98	20.08	8.4	21.08	2.83	19.34	18.87	1.89	1.14	1.73	5.75	3.25	1.33	1.63
	c121704f6p131107	-5.29	0.000374	0.00814	151.64	398.26	552.06	395.32	27.02	614.52	361.47	71.37	41.38	80.04	174.97	47.6	25.25	31.62
	c121712f5p11071	-4.46	2.9e-05	0.00416	26.15	30.24	56.37	22.72	6.23	28.68	31.73	7.3	3.07	8.56	10.35	12	1.05	2.97
	c121766f1p2987	-5.11	3.85e-06	0.01	2.13	6.5	4.54	4.98	1.05	3.49	2.8	0.23	0.38	1.07	1.34	1.61	0.11	0.25
	c121774f1p31719	-4.44	5.28e-05	0.01	4.6	44.21	74.87	44.35	26.75	87.43	86.13	2.67	5.52	12.37	24.49	27.46	2.53	7.98
	c1217f8p21050	-3.74	7.96e-06	0.01	5.55	9.51	11.88	15.23	2.18	5.44	9.47	1.49	1.94	2.24	2.99	5.43	0.64	1.12
	c121854f1p01804	-5.15	7.69e-06	0.00641	3.78	8.21	13.58	9.08	1.33	8.83	5.79	1.34	0.77	1.86	3.2	1.4	0.79	0.48
	c121868f1p02618	-5.09	7.56e-06	0.00831	2.51	10.84	6.48	9.03	0.96	10.25	9.65	0.8	0.94	0.78	3.79	1.81	0.47	1.18
	c121882f10p5715	-5.42	9.39e-05	0.00791	29.77	89.23	133.8	124.98	8.01	90.43	150.46	16.22	8.94	18.51	37.66	18.09	4.38	11.76
	c12191f2p01122	-4.62	4.49e-06	0.007	2.23	5.98	5.38	6.12	0.52	5.14	4.57	1	0.45	0.95	2.23	0.74	0.5	0.6
	c121922f2p12179	-5.91	1.18e-05	0.01	1.99	15.67	16.02	16.39	2.34	16.95	5.76	1.2	0.88	2.08	4.59	2	1.08	0.88
	c121934f2p01656	-5.44	5.34e-06	0.00472	2.24	6.56	4.82	7.4	0.85	6.74	5.35	1.17	0.43	0.73	2.4	1.06	0.14	0.33
	c12194f17p3841	-6.82	2.06e-05	0.00606	5.75	23.21	14.24	21.64	3.41	26.56	32.8	2.3	0.79	2.34	6.98	3.24	1.07	1.99
	c121955f2p71955	-4.9	4.21e-05	0.00446	16.73	52.08	66.61	48.64	6.9	53.52	42.02	7.01	4.53	8.99	20.35	10.54	3.09	3.96
	c121992f1p0740	-8.58	1.39e-05	0.00293	5	13.14	13.43	13.97	0.98	17.89	18.05	1.8	1.01	2.75	2.12	0.9	0.3	0.73
	c122006f2p81353	-8.45	5.09e-06	0.01	0.92	0.98	7.38	6.29	1.62	6.09	6.72	0.61	0.15	0.45	0.31	1.41	0.17	0.46
	c122013f1p3596	-5.47	1.1e-05	0.00226	7.73	14.96	13.46	9.75	1.67	10.09	13.39	3.64	1.61	0.89	3.63	2.51	0	0.71
	c122021f1p1905	-5.32	4.4e-06	0.00657	3	5.12	7.14	3.56	0.75	4.39	5.34	0.57	0.69	0.92	0.91	0.96	0.86	0.6
	c122026f5p4700	-6.23	1.37e-05	0.00476	4.96	17.43	15.68	15.07	1.79	10.26	20.92	2.02	0.65	1.51	4.73	2.2	1.44	1.26
	c122035f5p21235	-10.66	3.4e-06	0.00932	0.3	4.31	4.85	3.72	0.34	2.69	2.87	0.36	0.17	0	0.4	0.67	0.09	0.1
	c122056f6p3726	-5.16	0.000123	0.01	29.32	94.29	176.39	112.09	23.01	175.01	221.43	13.01	8.12	30.73	36.75	42.06	6.32	24.08
	c122119f4p4850	-6.76	7.26e-06	0.00898	1.31	9.4	5.87	8.01	0.98	7.98	11.15	0.09	0.88	0.53	2.14	2.54	0.13	0.3
	c122136f2p2786	-9.56	2.01e-05	0.00936	5.37	30.52	8.26	26.66	3.19	18.29	23.95	0.66	0.11	1.16	7.59	1.7	0.14	0.8
	c122138f2p02128	-5.36	2.48e-05	0.00551	9.78	40.34	35.88	17.83	6	29.24	23.36	3.08	3.01	4.84	6.84	8.98	1.53	2.01
	c122160f2p11004	-8.87	9.81e-06	0.00219	3.21	12.14	8.44	12.87	2.18	9.79	8.28	1.04	0.62	0.45	2.63	1.23	0.11	0.33
	c122169f7p0960	-4.13	3.87e-05	0.01	21.56	62.39	64.45	20.2	8.47	59.55	42.22	9.93	5.85	16.33	11.03	15.2	5.13	4.1
	c122234f4p4806	-4.75	0.000276	0.00426	114.39	369.08	406.11	351.65	42.16	309.45	311.5	40.65	26.2	76.2	135.56	77.54	14.31	30.51
	c122241f3p01317	-4.08	1.65e-05	0.01	13.86	20.29	10.94	10.54	5.44	27.94	28.48	7.2	3.11	2.46	1.56	9.4	1.78	3.29
	c122244f1p21593	-6	4.25e-06	0.00937	1.24	3.34	5.32	3.95	0.62	5.67	6.33	0.89	0.18	0.57	1.56	0.45	0	0.76
	c122253f5p51079	-5.15	1.11e-05	0.01	3.55	19.49	13.85	10.86	1.21	11.19	13.62	2.34	1.65	2.24	4.59	2.04	0.52	0.93
	c122269f1p3880	-3.28	5.04e-06	0.01	4.51	5.8	6.24	8.51	1.95	3.47	8.67	1.61	1.18	1.55	3.29	2.39	0.64	1.29
	c122275f4p1702	-6.76	6.94e-06	0.01	2.12	6.64	4.98	12.84	0.59	6.63	9	1.38	0.59	0.97	1.65	1.02	0.48	0.24
	c12227f1p01706	-5.46	1.55e-05	0.00413	5	21.53	14.59	14.53	3.38	20.53	21.14	2.31	1.97	2.7	4.55	3.37	1.57	1.98
	c12229f2p0658	-4.65	2.75e-05	0.00434	11.08	41.01	33.26	29.13	5.37	37.87	31.64	6.88	3.53	6.43	12.53	6.15	2.88	2.35
	c12230f1p01383	-4.32	4.98e-06	0.00752	2.24	6.9	3.97	7.63	1.43	6.54	5.35	0.38	0.93	0.77	3.11	1.52	0.57	0.61
	c12231f6p0997	-4.47	2.06e-05	0.0049	11.05	22.23	29.5	30.34	2.82	19.72	28.88	3.73	3.5	5.16	10.44	6.95	1.01	1.55
	c122343f1p01935	-5.39	1.3e-05	0.00591	5.59	17.08	9.35	16.03	2.53	21.35	12.69	1.47	1.81	0.81	5.11	2.71	2.5	1.29
	c122350f1p41366	-4.1	4.57e-06	0.00974	3.64	4.24	8.8	5.38	1.76	2.83	5.27	1.2	1.01	1.17	1.4	2	0.41	0.58
	c12237f1p1905	-4.19	4.12e-06	0.01	2.45	4.38	4.93	7.66	0.57	4.67	3.89	1.72	1	0.67	2.09	1.07	0.12	0.14
	c122385f2p1999	-5.69	1.97e-05	0.00306	23.4	19.28	20.44	5.95	5.36	24.44	26.1	7.36	1.08	4.31	0.58	6.01	0.67	1.97
	c122401f4p21723	-6.25	1.11e-05	0.00576	3.08	17.57	14.13	8.85	2.26	13.3	10.56	1.98	0.87	2.15	2.1	2.38	0.84	0.85
	c122418f6p01275	-5.55	6.24e-06	0.00987	1.55	7.46	9.75	7.05	0.65	8	5.72	1.22	0.42	1.54	1.42	1.77	0.44	0.43
	c122459f10p1645	-5.02	9.16e-06	0.0037	5.19	10.32	13.15	11.08	1.37	12.16	7.29	1.27	1.16	2.23	3.21	1.99	1.04	1.17
	c122487f3p11206	-6.04	1.33e-05	0.00478	5.86	9.93	16.96	9.87	3.59	23.37	14.7	1.91	0.9	0.63	3.15	4.13	1.21	2.01
	c122492f3p11929	-4.72	1.07e-05	0.00389	5.01	16.32	12.93	11.64	2	12.74	11.58	2.12	1.31	2.94	3.56	3.38	0.99	1
	c122505f2p0753	-5.46	5.52e-06	0.00754	3.13	7.66	6.63	1.81	1.45	7.77	6.75	1.09	0.33	1.01	1.65	1.71	0	0.67
	c122527f18p4648	-4.93	1.31e-05	0.0058	6.88	16.43	17.71	15.49	2.25	8.21	21.41	4.02	0.64	3.51	4.6	2.3	1.38	1.49
	c122530f1p01104	-5.57	4.62e-06	0.01	1.39	3.84	6.91	6.48	0.5	5.64	4.73	0.71	0.14	1.38	2.15	0.31	0.39	0.22
	c12256f3p21988	-5.94	2.17e-05	0.00647	6.85	22.74	16.05	36.85	3.9	27.59	25.13	3.03	1.96	2.59	6.9	6.15	0.84	1.94
	c122578f1p11391	-5.72	7.6e-06	0.00291	3.46	7.78	9.64	10.35	1.27	7.14	8.5	0.8	1.04	0.87	3.08	1.58	0.24	0.81
	c122583f2p21318	-5.18	9.1e-06	0.00415	4.13	12.94	9.45	10.18	1.11	11.48	10.22	1.07	1.26	1.72	3.76	2.06	0.51	1.11
	c122612f1p1763	-11.25	2.79e-06	0.01	0.16	4.07	1.96	3.12	0.48	3.66	2.02	0.2	0	0.1	0.54	0.34	0.15	0.05
	c122637f5p41080	-5.52	1.74e-05	0.01	10.89	10.26	23.08	20.3	2.12	32.96	14.54	3.1	0.92	5.46	5.74	1.09	2.38	1.98
	c122640f6p3872	-5.28	1.29e-05	0.01	4.83	13.72	9.14	25.14	3.04	14.32	14.74	3.07	0.38	1.56	3.32	6.59	0.77	0.38
	c12264f2p12105	-3.74	4.32e-05	0.00611	23.41	61.75	55.7	64.03	8.54	63	48.46	13.22	8.36	10.95	26.61	18.76	3.96	4.99
	c122655f12p2806	-4.26	6.08e-06	0.01	4.46	6.88	11.14	3.8	1.68	4.95	9.66	2.4	0.72	1.32	1.44	1.53	0.56	2.03
	c12265f3p41037	-3.73	1.11e-05	0.01	11.1	10.26	19.71	8.69	2.41	20.11	10.62	5.52	0.72	5.18	2.55	4.46	2.37	1.41
	c122665f2p01496	-5.62	4.54e-06	0.00611	0.83	4.89	5.67	6.37	1.25	4.8	4.79	0.35	0.44	0.71	1.94	0.89	0.45	0.31
	c122667f2p41372	-6.21	6.05e-06	0.00969	2.98	9.69	6.18	9.17	0.72	4.84	3.98	1.03	0.51	0.83	1.08	2.13	0.24	0.21
	c122709f1p1834	-8.16	1.02e-05	0.00362	6.38	14.81	11.1	6.57	0.49	8.56	12.54	2.35	0.88	1.42	1.36	0.18	0	1.23
	c12272f4p1994	-5.35	1.2e-05	0.00495	5.72	12.7	22.04	14.01	2.88	12.81	8.74	1.94	1.63	2.05	3.9	4.39	0	0.84
	c122738f2p2611	-5.56	2.61e-05	0.0046	9.74	23.24	37.57	35.08	3.5	35.25	26.49	4.02	2.18	4.09	11.78	4.63	2.75	1.3
	c122746f5p7920	-5.23	1.08e-05	0.00316	9.42	8.43	18.42	11.64	2.6	12.41	7.45	3.64	0.81	0.82	3.68	3.79	0.12	0.59
	c122774f1p01728	-5.06	1.16e-05	0.00288	5.16	11.04	14.15	16.24	2.23	13.77	13.87	1.68	1.25	2.06	4.26	3.3	0.97	1.58
	c122777f1p02395	-4.67	3.73e-06	0.01	0.71	5.21	4.11	4	1.12	5.97	3.65	0.15	0.21	0.5	1.12	2.37	0.55	0.4
[truncated: 10,120 more rows]

## Sheet: Table S9
	TABLE S9. Complete list of DEGs, SUGIT HST VS HSB
[truncated: 22 more rows]
